# Supplementary material for: Single-cell RNA-seq analysis reveals penaeid shrimp hemocyte subpopulations and cell differentiation process
Source: eLife. 2021 Jun 16;10:e66954. doi: 10.7554/eLife.66954 (PMC8266392; doi:10.7554/eLife.66954)
Supplement: Figure 2—figure supplement 1—source data 1. [file elife-66954-fig2-figsupp1-data1.xlsx]

## Sheet: Figure 2-figure supplement 1A
Source data file for Figure 2-figure supplement 1A
Single-cell RNA-seq analysis reveals penaeid shrimp hemocyte subpopulations and cell differentiation process
Keiichiro Koiwai a, b, *, Takashi Koyama c, d, Soichiro Tsuda e, Atsushi Toyoda f, Kiyoshi Kikuchi c, Hiroaki Suzuki g, Ryuji Kawano a
a Department of Biotechnology and Life Science, Tokyo University of Agriculture and Technology, Koganei, Tokyo 184-8588, Japan
b Laboratory of Genome Science, Tokyo University of Marine Science and Technology, Minato, Tokyo, 108-8477, Japan
c Fisheries Laboratory, Graduate School of Agricultural and Life Sciences, The University of Tokyo, Hamamatsu, Shizuoka 431-0214, Japan
d Graduate School of Fisheries and Environmental Sciences, Nagasaki University, Bunkyo-machi, Nagasaki, Nagasaki 852-8521, Japan
e bitBiome Inc., Waseda University Incubation Center, Nishiwaseda, Shinjuku, Tokyo 169-0051, Japan
f Advanced Genomics Center, National Institute of Genetics, Mishima, Shizuoka 411-8540, Japan
g Department of Precision Mechanics, Faculty of Science and Engineering, Chuo University, Bunkyo, Tokyo 112-8551, Japan
*To whom correspondence should be addressed. Email: koiwai@kaiyodai.ac.jp
The number of transcripts per cell
Shrimp 1	Shrimp 2	Shrimp 3
12038	9758	9624
12129	8962	9270
11911	6689	8032
10092	7089	9267
11509	7069	8950
11022	6686	9648
9811	6739	8265
10345	7723	8467
10303	6750	9330
9401	5294	8557
10460	6726	11069
11384	5015	7489
9474	5265	7780
9420	6191	8736
8690	6003	6712
10236	5916	8291
9097	5831	9848
10109	6516	7747
9502	6600	7636
9415	8159	7861
9368	6930	7266
9374	5308	7609
9645	8289	6806
8523	6823	7045
8597	4959	6402
8713	5419	6473
9949	8938	8070
9328	4524	5842
10044	4779	5336
8121	5108	6949
8668	7498	7100
8063	6061	6420
9345	5075	6777
8433	6822	5482
7996	6029	6234
8017	4804	6929
8947	4595	6018
8074	4480	6038
7780	4396	6474
8544	4610	5802
8232	4860	5632
8693	5630	7611
8325	4787	4701
8381	5009	5409
8047	4539	6117
8291	8234	8628
8753	4435	5771
8803	5303	5109
8240	4421	5567
7882	4677	5109
7964	4052	5678
8506	3999	7391
8138	4786	5890
7120	7148	5922
7713	4911	5252
7713	5682	5540
7758	4227	5280
7408	4033	4772
9222	4458	4391
7176	4926	5654
7835	4551	4555
6760	5680	5022
8124	5008	5464
7988	4020	6148
7499	4228	4364
6973	4203	4226
8082	4431	4212
7938	6020	5960
10410	4263	4122
7181	3967	4140
7026	5439	4798
8447	3744	4719
6983	3962	4422
7499	3758	4601
6832	4141	4336
8033	4121	4673
7353	4365	4246
7411	4206	5203
7210	4500	4020
7424	4293	4515
7328	4184	3605
8165	3324	4166
7597	3959	3900
8087	4316	4041
6513	3557	4720
7342	4375	4474
6892	4644	3646
7399	3399	3946
8145	4620	4330
7192	3660	4172
6635	3694	3719
6798	3270	3762
6480	3485	3878
6068	4076	3438
6682	4889	3451
6517	3727	3635
7272	3663	3357
6531	3462	3121
6756	4993	3277
7512	4354	4552
7165	3567	3790
6884	4802	3102
6922	5509	4974
6801	4161	3257
7347	3790	3725
6939	4651	3430
6895	3450	2829
6602	4075	4093
7344	3747	3099
7938	3145	3497
7070	3686	3878
5977	4480	3216
7039	3956	3653
6655	4400	2420
5650	3716	2793
6992	3412	3904
6694	3835	3307
7810	3243	3114
6114	3454	3260
7244	3685	3266
6012	3476	3452
6330	3551	2876
7694	3435	2768
7334	4941	3184
7423	4153	3081
6760	4649	2911
6622	3310	2812
6839	3478	2783
6591	3698	2674
6745	4064	2230
5836	3316	2888
6161	5837	3549
6289	3463	2370
6680	3668	2522
6546	3863	2964
5943	6102	2096
6663	3707	2512
5790	3924	3506
6743	3758	2418
6192	3617	2509
6334	4430	2601
6908	3340	2671
7086	3942	2229
6349	3946	2360
6063	3802	2444
6351	3558	2716
5861	3487	1818
6799	4039	2734
6917	3551	2063
5670	3226	2440
6169	4931	2574
5832	3036	2739
6043	3246	1985
6355	3847	1895
5375	3357	2767
5753	3293	1631
6270	3519	2079
5692	3270	2457
6285	2893	3345
5875	3719	1875
5522	3019	2925
6731	3349	1425
5590	3290	1818
7013	3549	1513
7255	3504	2345
6260	4296	1757
5918	3347	1697
12282	3373	1924
5743	3829	3308
6556	4151	2018
5751	4963	2243
6382	3384	1884
5072	3246	1361
5522	3739	1285
5817	3388	3465
6692	2991	2080
5524	3253	3710
5662	4330	3374
6055	3295	1412
6015	3065	1437
6120	3133	1592
5644	5718	2993
5393	3614	1663
6524	3529	2040
6561	4101	1743
5480	4610	1766
5524	3813	2063
5346	3756	1763
5884	3162	2112
5864	3460	2145
6275	2985	1228
6307	4106	2405
5464	3537	1910
5200	3179	1696
6198	3658	2141
5281	3506	2856
5658	3327	3210
5777	3058	1047
5606	5772	2027
5766	3392	3160
6366	3511	2877
6634	3190	2137
5088	3694	1755
5611	3536	1493
6149	3833	1779
5428	3174	2088
6024	3413	2774
5421	3741	2404
5725	2836	2012
6017	3405	1577
5616	3140	1946
6231	3411	1296
5569	2754	2145
5141	3249	2615
6741	3167	2565
5810	3346	1616
5858	2901	2170
6179	3302	1677
7057	3210	2069
6067	3290	1711
5430	3978	1950
5245	3428	2503
6007	3036	1264
5784	3118	1551
5543	3957	2290
5342	2947	2183
5347	2798	1100
6449	2922	1282
5387	3076	1161
5275	3072	2322
5280	3332	2085
4589	3134	1062
5013	5211	1395
5278	3702	2155
5243	3322	2303
5293	3000	2432
5139	3343	2342
5189	2731	2059
5116	3105	1857
4789	3315	1986
4662	3796	1569
5268	3530	2021
5559	3079	1680
4980	3390	1279
4977	3469	1810
5297	2839	2441
4954	2832	1895
5287	3135	2007
5458	2572	2265
5829	3821	1845
4630	3139	1560
4733	2783	1831
5410	3116	1837
5740	3174	1803
5189	3729	1809
6668	2924	1720
5129	3661	1482
5555	3461	1577
5292	2561	1667
4316	2695	1875
5246	2847	1028
5657	2768	2097
5860	2392	1627
5782	3146	2082
5013	2940	1721
4784	3295	1192
4847	3666	1679
5910	2741	2149
5277	2766	2040
5168	3044	1723
4387	3890	1847
5010	3072	1134
5044	3688	1856
4425	2974	1929
5363	2973	2089
5141	3085	1613
5445	3574	867
4554	3559	1330
5086	2744	2176
4879	3374	1831
4736	2518	1965
5415	3802	1778
4946	3164	1870
5200	2667	1666
5259	2832	999
4809	3396	1774
4848	3099	1464
4491	3202	1332
5045	2527	1816
4766	2975	2021
4663	2744	2280
4359	3532	1007
4332	2598	1536
4888	2872	1806
6181	3252	2110
4540	3361	1750
4775	2621	2141
4872	3208	1073
4602	2888	1285
4163	2633	2089
4561	2665	1686
4726	2854	1351
4730	2702	1825
4647	2851	1052
4688	3155	1093
4661	2772	882
4404	3089	1798
6412	3613	1547
4431	2629	1834
5041	2320	1471
4138	2846	1718
4885	4275	1111
3883	3169	1164
4623	3018	1316
4918	2904	1985
4364	3796	1919
4462	2716	1991
4443	3819	895
4252	3560	1571
4235	2932	2217
4488	2695	1342
4989	2695	1868
4983	3557	933
4565	2563	1755
5109	2641	1702
4190	2934	858
5075	2932	1728
4320	2726	872
4135	3243	1546
4992	2640	1460
4177	2692	1530
4389	2784	1427
5144	2949	1524
4151	2176	1372
4747	2490	1574
3898	2922	1733
4525	2528	1795
5074	2395	1511
4161	3066	1506
4184	2843	1144
5219	4653	1687
4154	3043	1516
3849	3192	1575
4522	2695	932
4568	2653	1805
4098	2514	1912
4423	2983	1272
4570	2687	1433
5343	3327	1671
4129	2635	1596
3961	2363	1600
4694	2756	1478
4303	2290	1524
4470	3246	2039
4210	2823	1779
3623	2482	1284
4113	2649	1856
5004	2555	1493
4367	2706	1711
3698	2751	1713
4107	3585	1364
3582	2871	1215
3742	2743	1832
3727	2975	1487
4417	2444	1937
3805	2723	1325
3533	2447	1537
3961	2560	1591
3416	2948	1784
3938	3130	1921
4343	3316	1695
4003	2608	1657
4151	3644	1440
4316	4001	1186
4043	3048
3746	2469
4149	2289
4393	2358
4068	3146
3788	2287
4139	2378
3703	2305
4197	3442
4519	2559
3919	2389
3491	3124
4405	2647
3598	2721
4105	2629
3820	4233
4354	2840
4116	2642
3839	2474
4447	2834
3883	2902
4473	2565
4142	2458
3853	2186
3770	2737
3555	2414
3646	2139
4047	2744
4523	2285
3599	2298
3856	2882
4037	2796
4337	2568
3630	2804
3387	2431
5783	2578
3323	2806
3236	2356
3538	3279
4069	2184
3386	2919
4963	2898
4159	2402
3496	2952
3378	2368
4403	2101
4510	2368
3330	2617
3443	2451
4124	2505
3689	3572
3694	2412
3852	2907
3490	2314
3471	2549
4291	2617
4372	2357
3641	3869
4663	3030
3336	2683
3745	2726
3698	2680
3471	2452
3174	2898
3354	2246
3906	2419
3357	2247
4688	2886
3779	2188
3782	2115
2912	2197
3100	2201
3251	2661
3621	2161
4626	2294
2903	2350
4179	2490
3590	2554
3744	2310
3132	2602
3348	2244
3185	2917
3391	3337
3676	2211
3244	2271
3490	2246
2933	1958
3350	2434
2867	2265
3542	2079
3842	2316
3662	2547
3433	2220
3615	2531
3364	2097
3147	2802
3681	1990
3372	2215
3093	2252
3279	2174
3984	3376
3997	2216
3442	2021
2911	2821
3452	2423
2777	2229
3662	2447
3501	2498
3958	2014
4095	1997
3283	2282
2978	3960
2851	2505
2996	2832
3008	3162
3794	2301
3766	3461
3888	3130
3327	2427
2867	2451
3237	2134
4158	2673
3684	2605
2858	2204
3432	2395
3404	2180
3050	3173
3540	2247
3110	2468
2999	2193
3288	2894
2722	2620
3958	2970
2897	1995
3358	1912
3401	2032
3379	2245
3879	2266
3973	2115
4107	2497
3243	2746
2752	2279
3334	2347
3182	2309
2694	2574
2932	1948
3322	1910
3299	3532
3785	2099
3657	1938
3195	1958
2780	2071
3282	2087
2764	2270
2985	2408
3429	2601
2894	3300
2963	2094
3156	2386
2990	2131
2893	2571
3830	2051
3065	2375
3033	2126
4314	2427
2603	1999
2789	1871
2638	2137
2922	2209
2828	2234
2917	2268
3619	2354
2836	2197
3185	2117
2658	2382
2529	1956
3145	2101
3372	2439
2672	1832
3430	2689
3247	1862
3230	2447
2719	2341
3398	2227
3469	2424
2614	3004
2750	1711
2936	2714
2758	2126
2697	2361
2885	1778
3304	2185
2777	2451
3018	2384
2527	2278
3012	1998
3022	2135
2649	2200
3100	2426
2913	2034
2853	2485
2560	2167
2787	1982
3682	2854
2668	1940
2635	1849
2830	1932
2677	2341
2523	2017
2525	1812
3085	2456
3481	2484
2980	2259
2893	2077
3229	2223
2466	1960
2836	2043
2641	1809
2427	1976
2667	1928
2846	2262
2429	1905
2588	1749
2812	1893
2746	2890
2599	2314
2796	1988
2779	2017
2341	1702
2979	1993
2494	1985
2371	2390
2212	1685
2497	2152
2754	2039
2829	2184
2634	2001
2665	2795
2760	2354
2347	1982
2459	2312
2260	1840
2779	2132
2217	1669
2896	2505
2824	1723
2146	2151
2289	1808
3030	2189
2596	2080
2103	1952
2337	1759
2516	2076
6651	1907
2755	1667
2588	2126
1929	1945
2511	2406
2118	1997
2729	2133
2430	2035
2433	1629
2830	1962
2808	2036
2513	1901
2705	1785
2633	1974
2167	1782
2754	2137
2573	2015
1992	1688
4005	2125
1850	1894
2309	1979
2055	1989
2112	1860
2558	2428
3889	1993
2281	1835
2346	2116
2132	1585
2207	2703
3184	1852
1996	1821
1876	1885
2710	1956
2540	1850
1988	1854
2217	1861
2203	1688
2416	2592
2657	2465
2434	1623
2059	1994
2304	2066
2460	1724
1985	1772
2026	2171
2275	1748
2086	1531
2470	1999
1838	1833
2518	1676
2215	2028
2283	2300
1897	2066
2616	2041
2034	1448
2046	1968
2037	1815
1778	1747
2441	2026
2123	1629
1904	2117
1688	1884
2705	2383
3380	1964
1982	2052
2029	1851
2059	2157
2187	1600
2143	1841
1689	2346
1815	1900
1545	1728
1890	2006
1912	1967
2230	2052
2747	1813
2120	2691
1750	2342
1669	2133
1702	1991
1836	1896
1962	2198
2013	2065
1563	2421
1847	1668
1969	1467
1841	1793
1754	1614
1748	2138
1618	1966
2500	1731
1623	1778
2009	1920
1884	1840
1577	1789
1801	1481
1539	1960
1827	1814
1424	2516
1644	1886
1481	1770
1948	1930
1820	1764
1548	1862
1632	1827
1660	1566
1781	1760
1646	2089
1684	1978
1621	1797
1987	2002
1769	1859
1397	1689
2004	2093
1457	2183
1670	1929
1461	2091
1591	1674
1509	1779
1766	1877
1913	2071
1917	1927
1348	2143
1663	1580
1773	1751
1276	1925
1420	1560
1558	1931
1275	1993
1483	2254
1922	1912
1940	2272
1335	1813
1650	1665
1415	1530
1630	2450
1613	1525
1554	1681
2563	1816
1531	1852
1394	1834
1611	1687
1405	1837
1694	2400
1484	1626
1830	1759
1304	1593
1601	1675
1369	1607
1319	1597
1036	1673
1434	1681
2009	2024
1303	1725
1582	1880
1299	1677
1461	2058
2084	1560
1277	1790
985	1567
2009	1562
2766	1944
1432	1487
1307	1426
1971	1937
1335	1798
1652	1682
1198	1448
1070	2179
1112	1851
1351	1592
1159	1336
1427	1540
1002	1807
1580	1688
912	1717
1721	1481
951	2174
1410	1645
1351	1563
887	1796
1665	2129
1145	1426
1340	1543
1285	1819
1138	1380
1231	1527
1783	1616
821	1601
1690	1750
1391	1517
770	2001
2282	1810
1722	1648
937	1786
985	1394
1070	1536
1301	1343
2293	1675
1085	1457
1380	2229
1745	1376
1159	2002
1939	1739
1485	1493
865	1689
826	1659
1314	1721
1052	1657
877	1494
744	1549
1015	1687
829	1704
973	1602
819	1362
1073	1724
1711	2126
995	1522
1067	1515
878	1669
1141	1519
1265	1818
877	1667
1479	2069
1019	1674
1884	1597
1662	1344
1030	1580
1715	1652
1099	1347
1577	1793
1906	1568
1613	1807
994	1490
1096	1722
839	1491
1299	1617
1862	1662
1196	1332
997	1627
1000	1910
1101	1815
872	1703
1009	1553
1685	1512
1076	1444
1102	1420
1456	1892
1300	1899
1639	1561
1258	1829
1689	1141
981	1362
1619	1890
901	1778
1375	1884
1169	2153
1286	2146
1145	1342
1195	1657
1341	1461
1349	1667
1181	1162
1179	1290
1632	1579
	1453
	1400
	1256
	1775
	1432
	1723
	1874
	1385
	1513
	1829
	1382
	1321
	1432
	1731
	2261
	1384
	1570
	1562
	1570
	1387
	1434
	1449
	1589
	1275
	1728
	1244
	1393
	1343
	1504
	1490
	1381
	1682
	1419
	1399
	1322
	1126
	1702
	1950
	1718
	1238
	2066
	1302
	1686
	2064
	1614
	1387
	1943
	1557
	1538
	1549
	1508
	1442
	1446
	1582
	1433
	1417
	1570
	1370
	1356
	1238
	1384
	1470
	1279
	1655
	1331
	1329
	1217
	1746
	1613
	1464
	1732
	1228
	1972
	1807
	1186
	1260
	1966
	1416
	1928
	1717
	1547
	1335
	1741
	1801
	1264
	1422
	1249
	1300
	1442
	1675
	1377
	2030
	1314
	1148
	1187
	1584
	1314
	1297
	2479
	2278
	1609
	1226
	1447
	1407
	1340
	1204
	1221
	1370
	1499
	1572
	1452
	1425
	1250
	1371
	1306
	1524
	1381
	1474
	1054
	2058
	1564
	1478
	1678
	1574
	1262
	1218
	1350
	1433
	1875
	1355
	1386
	1394
	1629
	1486
	1207
	1487
	1373
	1945
	1385
	1287
	1366
	1274
	1267
	1384
	1304
	1566
	1199
	1150
	2027
	1367
	1358
	1474
	1388
	1196
	1528
	1717
	1455
	1825
	1587
	1394
	1492
	2127
	1394
	1442
	1339
	1252
	1187
	1040
	1681
	1216
	1545
	1444
	1519
	1237
	1391
	1635
	1484
	1350
	1422
	942
	1770
	1312
	1333
	1617
	1251
	1350
	1317
	1226
	1308
	1412
	1176
	1453
	1325
	959
	1283
	1364
	1282
	1215
	1096
	1357
	1227
	1188
	1454
	1164
	1484
	1313
	1687
	1166
	1610
	1938
	1421
	1400
	1324
	1278
	1011
	1161
	1332
	1140
	1251
	1096
	1329
	1273
	1509
	1103
	1212
	1173
	1299
	1156
	1087
	1182
	1195
	1315
	1464
	1133
	1136
	1207
	1233
	1369
	1218
	1063
	1128
	1275
	1567
	1089
	1180
	1181
	2199
	1202
	1114
	1359
	1379
	1134
	1045
	1354
	1251
	1206
	1392
	1122
	1043
	1260
	1274
	1088
	1099
	1151
	1152
	1295
	1163
	990
	1223
	1104
	1340
	1013
	1253
	1229
	1019
	1145
	1046
	1622
	1265
	1128
	1199
	1478
	1200
	1474
	1099
	1319
	1298
	1415
	1421
	1265
	921
	1164
	1268
	1277
	1326
	1129
	1032
	1235
	1168
	1248
	975
	1113
	1360
	1197
	1255
	1154
	1057
	1078
	1498
	1260
	1290
	1454
	1018
	1225
	1268
	1262
	1047
	1033
	1167
	1128
	1300
	1262
	1138
	1248
	1088
	937
	966
	1134
	1693
	1309
	1114
	1624
	1420
	1046
	1421
	1289
	860
	1101
	1086
	1019
	998
	1202
	1035
	1022
	1109
	1297
	1241
	1426
	1274
	1447
	1388
	1198
	1275
	1012
	933
	1167
	1039
	1063
	1057
	1160
	913
	1275
	1039
	1247
	992
	983
	809
	1184
	1081
	1100
	1285
	1177
	1258
	921
	1113
	1352
	1106
	1251
	1178
	1404
	1093
	939
	906
	1035
	986
	1252
	1079
	1853
	1102
	1055
	1123
	1145
	1084
	1520
	1046
	1045
	1156
	1032
	925
	1129
	913
	1312
	1077
	1318
	1077
	1029
	918
	942

## Sheet: Figure 2-figure supplement 1B
Source data file for Figure 2-figure supplement 1B
Single-cell RNA-seq analysis reveals penaeid shrimp hemocyte subpopulations and cell differentiation process
Keiichiro Koiwai a, b, *, Takashi Koyama c, d, Soichiro Tsuda e, Atsushi Toyoda f, Kiyoshi Kikuchi c, Hiroaki Suzuki g, Ryuji Kawano a
a Department of Biotechnology and Life Science, Tokyo University of Agriculture and Technology, Koganei, Tokyo 184-8588, Japan
b Laboratory of Genome Science, Tokyo University of Marine Science and Technology, Minato, Tokyo, 108-8477, Japan
c Fisheries Laboratory, Graduate School of Agricultural and Life Sciences, The University of Tokyo, Hamamatsu, Shizuoka 431-0214, Japan
d Graduate School of Fisheries and Environmental Sciences, Nagasaki University, Bunkyo-machi, Nagasaki, Nagasaki 852-8521, Japan
e bitBiome Inc., Waseda University Incubation Center, Nishiwaseda, Shinjuku, Tokyo 169-0051, Japan
f Advanced Genomics Center, National Institute of Genetics, Mishima, Shizuoka 411-8540, Japan
g Department of Precision Mechanics, Faculty of Science and Engineering, Chuo University, Bunkyo, Tokyo 112-8551, Japan
*To whom correspondence should be addressed. Email: koiwai@kaiyodai.ac.jp
The number of genes per cell
Shrimp 1	Shrimp 2	Shrimp 3
3767	3591	3558
3724	2783	2857
3896	2589	3043
3694	2910	3247
3989	2534	2937
3768	2720	3111
3680	2387	3283
3415	3066	3498
3862	2270	2785
3296	2181	2626
3917	2401	3242
3839	2257	2808
3361	2333	2778
3938	2547	3188
3649	2426	2604
3536	2527	2956
3522	2345	3782
3630	2722	2514
3697	2664	2876
3746	2450	2536
3770	2234	2800
3447	2399	2866
3576	2860	2904
3468	2283	2400
3443	1526	2777
3506	2373	2680
3676	2573	2652
3188	1807	2521
3539	2082	2167
3010	1989	2636
3481	2595	2493
3541	1864	2453
3234	1689	2569
3336	2130	2296
3828	2109	2611
2988	2048	2495
3785	1963	2512
3622	2036	2114
3635	2064	2460
3648	1873	2682
3368	2290	2389
3813	2067	2584
3203	2215	2305
3462	2173	2474
3384	2062	2697
3099	2312	2706
3291	1883	2235
3346	2128	2275
3448	2115	2425
3251	2301	2503
3143	1963	2590
3608	1931	2575
3648	2012	1907
2872	2434	1991
3381	2133	2708
3168	2544	2360
3500	2001	1645
3146	1673	2466
3720	2352	2003
3317	1929	2110
3558	1706	2270
2852	2213	2242
3239	1993	2086
3625	1806	2201
3263	1981	1916
3055	2001	1953
3323	2017	2019
3321	2065	2344
3936	1841	1763
3355	1464	1864
3014	1969	1774
3201	2030	1819
2685	1835	1830
2860	1703	1874
2517	1653	1717
3789	1857	1985
3442	2015	1242
3551	1666	1454
3232	1987	1910
3037	1988	1866
3160	1724	1751
2615	1411	1939
2896	1722	1972
2987	1867	1732
2789	1655	1913
3421	2070	1839
3094	1786	1731
2710	1596	1951
3244	1926	1758
3140	1883	1895
2476	1635	1752
3170	1430	1792
2840	1663	1937
2565	2038	1480
2585	2049	1494
2795	1677	1438
3349	1728	1594
2835	1335	1560
3166	1811	1353
2470	1700	1822
2723	1822	1839
2995	1920	1323
3159	2025	1834
3248	1665	1641
2934	1700	1427
3426	1724	1676
3112	1554	1446
2478	1705	1878
2763	1472	1279
3119	1239	1708
2731	1608	1762
2500	2030	1522
2851	1736	1686
2956	1694	1288
2714	1831	1594
3011	1718	1593
2807	1600	1706
3648	1503	1385
2470	1798	1572
2834	1399	1888
2562	1629	1656
2666	1652	1273
3485	1357	1450
3114	2213	1615
3334	2017	1206
2189	1663	1551
2508	1632	1410
3161	1553	1399
2927	1791	1467
3194	1983	1230
2442	1763	1636
2736	1922	1569
2806	1402	983
2764	1650	1190
2818	1437	1514
2887	1693	1183
3002	1710	1080
2819	1705	1242
2659	1623	1094
2461	1676	1026
2669	1898	1222
2925	1677	1299
3031	2014	1198
2848	1675	1248
2952	1787	1151
2703	1594	1387
2683	1230	957
2474	1379	1308
2765	1492	1129
2399	1594	1007
2733	1825	1277
2501	1407	1275
2779	1474	755
2526	1588	1112
2328	1358	1229
2253	1189	1128
3146	1411	1133
2312	1534	1232
2921	1571	1375
2666	1582	819
2591	1535	1200
2860	1484	729
2558	1720	983
2915	1640	780
2694	1583	1091
2842	1980	717
2384	1359	960
3450	1665	1010
2696	1551	1300
2585	1826	1069
2674	1880	1009
2626	1699	986
2446	1439	783
2366	1663	707
2418	1580	1126
2995	1317	1032
2180	1478	1329
2528	1724	1175
2772	1260	749
2354	1557	754
2765	1513	886
2573	1629	1116
2214	1708	884
2877	1657	971
2771	1925	993
2629	1575	919
2219	1836	980
2400	1747	950
2852	1280	971
2648	1738	1047
2687	1430	868
2451	1737	1101
2742	1619	959
2601	1643	776
2442	1524	913
2530	1810	991
2547	1465	1109
2804	1537	637
2802	1727	924
2701	1462	1066
2199	1494	1116
2768	1552	968
2404	1736	894
2575	1675	796
2206	1676	897
2390	1275	866
2924	1378	1016
2700	1530	973
2120	1371	910
2666	1602	819
2325	1484	858
2657	1426	763
2575	1226	862
2292	1501	984
2500	1513	951
2385	1691	817
2670	1327	933
2206	1472	865
2830	1323	837
2219	1566	786
2252	1699	864
2327	1558	872
2631	1592	703
2638	1628	782
2568	1693	827
2495	1613	896
2412	1240	677
2736	1508	785
2320	1151	641
2238	1426	854
2513	1321	842
1889	1318	612
2686	1669	822
2335	1356	844
2441	1629	891
2366	1344	836
2309	1627	849
2575	1480	822
2515	1723	860
2227	1799	895
2171	1722	675
2101	1652	879
2274	1456	706
2398	1583	730
1996	1588	729
2443	1333	791
2451	1414	811
2143	1619	803
2415	1238	841
2395	1640	736
2260	1605	702
1903	1329	791
2706	1387	734
2424	1508	766
2534	1751	798
2736	1282	763
2532	1518	727
2212	1686	785
2396	1201	754
1990	1349	750
2652	1473	664
2667	1437	744
2772	1252	665
2567	1541	805
2434	1335	711
2133	1648	652
2264	1491	736
2776	1245	822
2527	1321	819
2294	994	712
1886	1749	770
2457	1477	631
2295	1572	780
2069	1288	765
2551	1358	769
2390	1286	686
2566	1570	661
2057	1560	648
2257	1404	792
2308	1229	750
2288	1357	768
2105	1398	730
2374	1487	778
2503	1459	755
2411	1235	582
2395	1407	758
2143	1601	679
2130	1749	698
2494	1172	755
2418	1045	737
2170	1375	867
2210	1527	609
2254	1166	732
2408	1417	712
2548	1505	705
1985	1301	763
2284	1260	769
2483	1417	612
2002	1382	653
1737	1415	750
2145	1102	708
2455	1590	637
2186	1662	762
2155	1151	584
2095	1533	592
2167	1355	538
2290	1436	698
2663	1541	685
2001	1427	737
2225	1084	769
1998	1344	726
2179	1437	628
1861	1516	584
2222	1524	693
2326	1530	812
2149	1585	753
1676	1185	724
1720	1535	583
2224	1444	690
2211	1379	780
2285	1402	700
2117	1297	768
2338	1529	593
2481	1376	732
2346	1404	693
2240	1605	577
2325	1244	729
2145	1356	554
1818	1282	656
2159	1219	626
1916	1405	742
2212	1283	639
2518	1454	646
1785	1186	653
2075	1226	757
2064	1342	644
2114	1289	701
2310	1289	678
1926	1370	653
1929	1457	563
2147	1450	685
2095	1476	673
2112	1426	724
2183	1076	538
2199	1374	702
1986	1297	798
2007	1488	623
2013	1210	615
2555	1692	697
2104	1305	657
1995	1211	683
2347	1503	629
1818	1107	630
2082	1258	780
2110	1549	647
1954	1202	622
1873	1431	705
2412	1298	692
2118	1539	741
1684	1426	685
2060	1455	591
1820	1470	603
1738	1325	690
2092	1545	652
2078	1338	722
1872	1394	612
2043	1089	636
1516	1343	712
1707	1368	729
1673	1371	675
2202	1356	728
1889	1278	639
2122	1590	636
2147	1297	631
1927	1375
1787	1396
1582	1049
1642	1312
1895	1583
1942	1154
1830	1338
1983	978
1976	1354
2062	1492
1913	1083
1916	1380
2151	1268
1822	1168
1945	1170
1702	1569
2027	1324
2220	1288
1736	1411
2113	1351
1811	1304
2007	994
1729	1293
2031	1232
1911	1099
1718	1052
2013	1196
1815	1484
2126	1034
1829	1054
2065	1351
2049	1091
2021	1102
1940	1428
1401	1286
2138	1182
1801	1306
1595	1116
1837	1423
1944	1023
1986	1500
2399	1372
2095	1198
1875	1078
1509	1286
2063	1083
2105	1337
1354	1341
1690	1062
1800	1272
1780	1266
1819	1305
1931	1251
1684	1144
1806	1273
2101	1336
2209	1122
1774	1400
2142	1398
1840	1320
1323	1285
1717	1323
1548	1037
1736	1198
1611	1239
1928	993
1867	1050
2017	1357
1693	1329
1929	1046
1483	1042
1343	1237
1690	1366
2004	1221
1920	1095
1567	1012
1761	1209
1860	1106
1920	1342
1731	1267
1731	1314
1587	1491
1777	1384
1750	1234
1401	1252
1785	961
1486	1048
1690	1283
1447	1093
1542	1208
1953	1034
1535	1176
1734	1276
1885	1192
1708	1000
1610	1359
1824	1054
1507	1187
1432	1054
1742	1133
1940	1357
1925	1188
1501	1152
1556	1189
1813	1268
1468	1347
1683	1147
1855	1279
2046	1116
2051	1041
1633	1230
1450	1259
1582	1091
1568	1360
1533	1238
2002	1224
1579	1308
1845	1319
1695	1133
1503	1159
1385	1086
1694	1329
1746	1190
1551	1162
1674	1218
1800	1112
1558	1354
1851	1310
1430	1044
1500	1073
1493	1162
1309	1313
1656	1226
1258	1220
1724	953
1781	1316
1735	1211
1898	1069
1844	1099
2026	1229
1828	1259
1444	1204
1691	1302
1846	1043
1316	1290
1513	1054
1714	1051
1405	1287
1919	1015
1738	1125
1695	1087
1410	1201
1643	971
1352	1182
1458	1180
1684	1326
1484	1285
1577	912
1450	1175
1426	1182
1266	1263
1720	1164
1740	1254
1762	1189
1816	1032
1388	975
1468	1002
1548	964
1541	1197
1488	1066
1588	1023
1712	1176
1338	877
1806	912
1420	1100
1349	883
1503	961
1651	1193
1445	1029
1691	1205
1622	944
1694	1202
1478	1144
1561	1149
1777	1160
1263	1277
1291	954
1596	1168
1199	1080
1328	1169
1298	977
1684	735
1469	1031
1570	1084
1462	1088
1551	1097
1600	1134
1527	1181
1577	1095
1662	828
1554	1236
1408	982
1498	942
1807	1222
1524	1050
1519	1117
1428	1098
1555	1199
1334	1058
1437	1025
1675	1329
1685	1136
1273	1071
1506	931
1532	1203
1390	1118
1492	966
1381	1060
1490	1026
1461	953
1493	1031
1468	1096
1314	806
1562	1114
1375	1206
1359	1050
1523	942
1529	1059
1246	739
1497	1096
1188	901
1200	1192
1095	831
1215	1033
1563	1140
1456	989
1458	1191
1389	1169
1386	1299
1329	1047
1388	960
1415	1006
1412	1108
1061	878
1452	1262
1210	958
1295	904
1206	946
1419	1152
1291	934
1185	930
1241	1045
1326	1160
1525	977
1477	948
1375	1076
1025	1149
1504	1073
1199	956
1391	1014
1342	1017
1469	911
1392	991
1346	1076
1397	1050
1431	856
1513	942
1248	990
1499	1063
1429	995
1223	773
1553	989
1008	967
1145	879
1191	887
1229	1051
1276	1169
1482	1036
1378	851
1315	1129
1231	928
1314	1221
1569	1004
1118	928
1126	1124
1423	1029
1316	978
1045	1063
917	1086
1274	910
1197	1079
1189	1065
1271	957
1028	989
1148	986
1396	919
1118	1053
941	932
1420	962
1308	908
1244	1103
1161	859
1293	1025
1221	1060
1184	1153
1234	1081
1284	1112
1251	769
1170	899
1058	1120
1086	1051
1302	1109
1153	943
1171	1025
930	1003
1360	1086
1316	998
1070	1055
1156	978
1092	1062
1266	892
1213	971
1021	1085
1049	1005
924	1042
1103	999
1084	990
1111	950
1287	1065
1048	1109
1013	1098
975	1137
1047	1078
1108	1057
1076	1060
878	1104
1054	1169
993	745
958	760
1060	973
1000	962
1036	1029
944	1006
1156	1005
882	1134
1142	1075
1037	892
917	920
794	902
945	964
966	1026
913	974
1008	947
951	803
1161	998
891	970
950	838
945	1041
957	841
1115	894
1015	1156
832	918
957	899
1071	1042
926	1012
949	862
1163	1103
853	1048
980	880
898	1040
971	884
827	909
1018	961
940	1096
1073	863
828	1115
994	897
1055	890
895	1009
766	835
902	653
774	1063
958	1056
974	949
1020	905
828	950
1033	932
854	905
1035	1059
961	780
933	922
1203	909
918	1040
706	880
994	972
780	972
911	1113
811	896
919	1010
700	928
865	966
708	984
944	898
681	824
918	1016
1002	966
826	878
898	950
752	926
862	1075
932	925
817	1001
673	763
888	960
1082	818
782	867
741	764
902	977
828	1044
917	706
687	753
859	1088
737	1039
769	872
724	814
770	788
687	898
796	904
631	936
820	746
628	1015
809	919
782	795
570	779
835	1056
725	826
795	812
705	1062
713	654
753	826
819	850
587	961
860	976
772	781
522	914
781	816
812	848
571	916
653	746
712	885
735	850
803	860
654	839
711	930
788	593
655	987
739	979
674	897
626	973
544	926
681	902
582	992
527	822
502	799
601	921
568	889
534	936
515	782
602	852
736	938
573	735
608	728
561	1009
623	910
715	970
591	945
684	1027
617	1035
718	848
705	810
635	947
783	988
638	785
669	859
752	795
707	910
569	810
652	808
550	888
664	929
734	925
601	824
557	880
575	1000
575	975
525	861
536	852
686	895
593	743
540	813
627	932
583	1034
645	882
552	1019
620	635
550	819
638	1074
533	958
602	983
611	942
612	963
590	772
566	886
611	788
604	802
555	644
568	808
661	650
	766
	842
	569
	863
	821
	863
	1000
	779
	931
	827
	857
	742
	877
	990
	942
	795
	940
	781
	741
	659
	794
	801
	892
	815
	885
	783
	803
	809
	853
	789
	748
	808
	760
	832
	811
	679
	983
	906
	896
	739
	943
	792
	972
	921
	893
	821
	1002
	888
	706
	870
	858
	851
	841
	821
	761
	683
	850
	766
	540
	769
	867
	912
	772
	857
	695
	685
	691
	934
	824
	874
	891
	715
	1001
	831
	636
	775
	832
	839
	946
	895
	704
	622
	941
	898
	674
	835
	691
	811
	752
	853
	630
	913
	745
	613
	580
	858
	763
	716
	831
	947
	763
	576
	819
	690
	749
	775
	732
	841
	806
	776
	846
	780
	726
	683
	746
	794
	811
	868
	593
	859
	843
	766
	761
	787
	729
	652
	731
	793
	837
	793
	781
	788
	877
	791
	645
	780
	748
	819
	798
	757
	765
	751
	756
	610
	579
	866
	763
	711
	817
	824
	827
	861
	768
	685
	836
	791
	790
	861
	848
	783
	767
	841
	768
	787
	747
	694
	725
	565
	883
	696
	802
	767
	781
	707
	753
	787
	754
	760
	794
	580
	849
	697
	709
	864
	764
	714
	683
	673
	680
	869
	677
	782
	790
	640
	696
	779
	734
	710
	670
	784
	576
	634
	840
	581
	695
	703
	761
	661
	722
	854
	722
	756
	737
	559
	609
	682
	782
	695
	747
	603
	780
	812
	779
	538
	729
	682
	710
	624
	663
	574
	750
	789
	776
	645
	777
	733
	672
	776
	784
	696
	709
	747
	783
	696
	511
	538
	851
	658
	640
	729
	760
	563
	710
	725
	712
	658
	786
	630
	590
	673
	743
	509
	660
	565
	707
	728
	764
	581
	693
	705
	739
	586
	736
	700
	603
	703
	670
	717
	759
	737
	697
	724
	681
	744
	640
	768
	732
	720
	790
	712
	615
	649
	764
	763
	748
	654
	663
	682
	610
	578
	624
	683
	760
	693
	534
	731
	676
	672
	829
	604
	682
	772
	684
	716
	707
	732
	636
	555
	673
	663
	739
	683
	659
	671
	626
	538
	577
	739
	809
	714
	676
	809
	733
	518
	693
	759
	530
	756
	637
	645
	730
	682
	610
	720
	645
	628
	701
	683
	705
	747
	733
	710
	691
	586
	511
	679
	520
	652
	689
	618
	533
	647
	663
	699
	637
	622
	531
	615
	648
	650
	712
	512
	672
	537
	584
	708
	658
	796
	709
	675
	595
	509
	613
	615
	573
	707
	633
	636
	706
	578
	713
	605
	626
	825
	643
	578
	624
	626
	558
	691
	510
	699
	559
	667
	677
	558
	581
	600

## Sheet: Figure 2-figure supplement  1C
Source data file for Figure 2-figure supplement 1C
Single-cell RNA-seq analysis reveals penaeid shrimp hemocyte subpopulations and cell differentiation process
Keiichiro Koiwai a, b, *, Takashi Koyama c, d, Soichiro Tsuda e, Atsushi Toyoda f, Kiyoshi Kikuchi c, Hiroaki Suzuki g, Ryuji Kawano a
a Department of Biotechnology and Life Science, Tokyo University of Agriculture and Technology, Koganei, Tokyo 184-8588, Japan
b Laboratory of Genome Science, Tokyo University of Marine Science and Technology, Minato, Tokyo, 108-8477, Japan
c Fisheries Laboratory, Graduate School of Agricultural and Life Sciences, The University of Tokyo, Hamamatsu, Shizuoka 431-0214, Japan
d Graduate School of Fisheries and Environmental Sciences, Nagasaki University, Bunkyo-machi, Nagasaki, Nagasaki 852-8521, Japan
e bitBiome Inc., Waseda University Incubation Center, Nishiwaseda, Shinjuku, Tokyo 169-0051, Japan
f Advanced Genomics Center, National Institute of Genetics, Mishima, Shizuoka 411-8540, Japan
g Department of Precision Mechanics, Faculty of Science and Engineering, Chuo University, Bunkyo, Tokyo 112-8551, Japan
*To whom correspondence should be addressed. Email: koiwai@kaiyodai.ac.jp
The percentage of mitochondrial genes per cell
Shrimp 1	Shrimp 2	Shrimp 3
2.76624	4.99078	5.94595
2.39921	5.06583	3.10009
2.03174	5.56137	1.42388
3.3591	1.87615	4.26829
3.5103	2.85755	4.73538
2.65832	3.57463	3.56601
1.89583	3.96201	4.54968
3.00628	4.53192	6.02527
3.4456	3.3037	5.66449
2.88267	3.55119	1.4862
2.90631	1.87333	2.7847
3.2941	3.23031	2.2438
1.15052	1.80437	4.46962
3.1104	2.72977	4.46747
2.96893	3.29835	3.77654
3.79054	3.5835	4.5709
3.00099	3.61859	4.45251
2.35434	2.76243	5.7045
2.77836	2.01515	5.59486
3.12268	1.61785	3.43578
3.41588	1.91919	3.6137
3.81907	3.44763	3.28482
3.81545	1.9544	5.14139
2.37006	1.02594	2.9533
2.40782	2.44001	3.21812
4.48755	4.81639	1.74888
3.13599	2.39427	2.12226
2.0476	3.71353	2.32348
3.64397	3.41076	3.41802
2.85679	2.66249	1.9972
3.34564	1.45372	1.9956
3.53466	1.5509	2.98331
1.71215	2.38424	3.23244
3.64046	1.39255	3.70476
2.86393	1.69182	4.17057
1.08519	3.74688	4.09393
2.86129	4.15669	2.41636
4.14912	2.38839	3.8343
3.40617	3.73066	3.26087
2.75047	2.45119	2.8925
2.74538	2.73663	4.6338
3.38203	2.41563	2.67913
1.42943	5.91184	2.06581
3.9852	2.25594	1.75119
1.11843	2.02688	3.81777
3.5822	1.28735	5.77284
2.19353	2.32244	3.67232
2.8513	3.97888	2.2524
3.78641	2.62384	1.96169
3.70464	3.80586	3.32644
1.31843	2.44324	2.4858
3.17423	4.30108	1.51097
4.03047	5.80861	3.70134
2.28933	1.73475	2.69921
7.81797	1.3032	3.98888
3.81175	3.32629	2.05146
2.21707	4.06908	4.60925
3.18575	3.91768	2.99472
2.42897	3.54419	2.17352
2.02062	3.06537	2.95557
4.28845	2.48297	2.64178
3.09172	1.93662	1.24476
3.54505	4.35304	2.03735
1.69004	4.10448	2.80311
2.89372	3.76064	2.39909
3.44185	3.44992	4.45848
1.47241	2.75333	3.25758
1.29756	1.86047	3.37385
2.58405	3.49519	3.64382
2.75728	2.92412	3.39583
2.74694	1.76503	2.72228
3.26743	3.20513	4.67941
1.40341	3.23069	2.89165
2.29364	4.68334	2.81392
2.62002	1.9802	4.14757
2.96278	2.83912	2.31898
3.65837	3.06987	4.77208
3.06301	4.92154	1.37584
4.50763	2.44444	1.38282
4.45851	6.05637	2.43961
4.08024	2.72467	5.81492
1.77587	2.55716	3.60246
1.57957	4.82445	1.40208
1.36021	1.64504	2.21691
2.7637	3.12061	2.7214
1.13048	3.77143	5.34988
1.9733	5.08183	2.1903
1.82457	3.00088	1.65289
2.45549	2.85714	4.70149
1.80756	3.30601	4.93909
2.14017	1.32648	2.77393
4.41306	3.0581	1.96831
3.14815	5.25108	5.05128
3.62558	4.31796	3.19228
1.90063	1.98405	4.61864
3.29906	3.38074	4.93965
3.64411	3.9585	3.34613
2.35798	3.11958	2.99037
3.93724	1.86261	1.70901
1.69063	3.55994	2.61266
1.85625	4.34539	3.63001
3.86403	3.70679	3.16321
2.45594	1.41586	3.30067
2.27908	2.33117	2.64689
2.39554	3.48285	3.94089
2.10405	2.8596	2.36589
3.29224	2.52174	3.39589
1.80248	5.12883	9.51618
2.23312	3.57619	2.41074
2.28017	3.27504	1.47188
2.843	2.76723	2.77045
2.50962	1.22768	1.80529
1.9463	3.53893	1.66868
3.60631	3.47727	4.20632
3.15044	2.93326	3.03356
4.04748	3.72216	6.50146
2.94293	2.45111	4.48922
2.79129	2.99106	3.90911
2.895	5.21135	2.90416
2.76091	3.4464	3.77466
3.80905	4.74684	1.03146
4.62875	3.46381	3.04726
1.20873	2.99854	1.66986
3.12244	1.90245	3.55372
3.07153	3.94895	5.40637
1.36095	1.26909	5.43033
1.96315	4.32024	1.23979
3.23147	2.6452	3.53243
4.06615	4.08329	6.28834
4.46256	3.93701	2.44948
1.83345	3.64897	3.65006
4.67457	1.11359	1.94715
3.24376	3.72509	2.85405
2.93413	3.84406	3.48618
2.84143	2.66632	3.63518
2.33889	1.75352	2.98866
3.61699	3.31805	2.84495
2.17617	4.17941	5.46173
3.08468	3.35285	3.14136
2.03488	2.18413	6.81614
2.9839	3.90519	3.42798
3.76375	3.17365	4.95914
3.58453	2.56215	3.24895
3.79587	3.49721	5.74941
3.89246	5.07628	2.66532
2.55078	3.59753	3.76908
3.75363	1.14712	1.87102
2.1915	3.83758	3.02339
2.8336	3.23852	1.81969
1.71076	1.92188	4.3045
1.6048	2.73778	2.34525
2.88066	3.85375	4.08087
4.46798	1.41713	4.53118
3.58773	2.85937	3.81356
1.24651	2.77033	2.74141
1.16461	2.6116	2.46686
2.71132	1.36402	2.75028
2.35418	3.24159	1.75567
2.32299	2.4542	4.41105
2.60426	2.04356	1.7623
2.73452	1.78867	5.47786
3.66959	4.50881	2.04454
2.54025	4.10334	3.12343
1.28333	1.69062	5.85752
2.72915	4.28082	1.62631
3.72204	3.3054	2.20723
2.17979	2.33045	4.4733
1.50627	3.88378	1.5466
3.09943	2.50718	1.88341
1.49481	2.77042	2.82667
4.78178	1.49103	1.4359
3.88593	4.04846	6.66667
2.68139	2.55699	1.65017
2.22745	3.93153	1.32188
4.53842	4.04368	1.70576
4.57262	2.60782	1.53671
1.97321	3.84261	3.47672
2.71989	3.74134	4.00208
2.19653	2.27618	1.29988
2.36076	1.40294	5.15362
2.30392	2.2662	4.01248
2.99433	1.15425	2.54777
3.13369	3.12673	5.6576
1.60944	2.862	2.87938
4.03902	3.04804	1.84704
4.17883	1.12798	1.29808
2.95076	3.09468	1.72507
1.14104	4.17998	1.39301
3.87492	1.99241	1.91218
3.12074	2.63006	1.60056
4.14343	1.94305	3.95729
3.94799	3.58013	1.00234
4.72182	1.32881	6.67468
1.82692	3.52312	7.10784
2.4524	2.02296	5.62249
3.12441	2.08214	3.62401
3.53482	1.65314	3.82937
4.29289	4.31655	7.82757
3.44274	1.28205	2.13068
3.71141	3.41981	1.11888
2.15206	2.96212	2.76873
2.41182	2.25705	1.91268
1.98506	5.17055	3.71728
2.85154	3.47851	1.76887
3.13872	3.99165	1.68146
3.35298	3.90674	1.19048
2.67264	2.51978	1.86916
3.44955	1.30981	4.58453
1.48472	4.47814	2.02269
4.20475	4.17034	1.77215
2.75997	3.12102	1.49461
3.43444	1.84697	1.26345
4.2557	2.90487	1.9943
3.01498	4.61681	2.61219
2.09168	5.20998	1.40528
3.54561	2.15182	1.24521
3.43121	2.9645	1.51406
2.31429	3.42217	1.45591
2.25308	1.80685	1.59046
2.6537	3.7386	2.79011
1.84162	2.43841	6.73176
3.39371	3.32555	3.3179
3.19627	2.23979	1.1655
4.35685	4.45799	1.6826
2.72416	4.70053	1.1306
2.63946	3.39328	5.32178
3.85263	2.9664	1.29032
3.56644	4.38056	1.19261
3.23	2.73082	2.17496
1.51659	5.27344	2.22092
3.6553	1.89076	4.20513
2.46241	2.04212	1.11866
2.67305	1.24736	6.25
1.57257	3.10643	2.06319
2.9754	4.06382	1.22271
2.645	3.3	2.10719
2.70481	2.36315	4.63636
3.0449	6.22483	6.00624
2.15012	1.67472	8.9578
3.32011	2.26244	1.55039
5.31961	2.79241	1.39089
1.68945	3.82436	4.04896
1.69095	2.82559	6.02151
3.83534	4.77876	1.02088
2.1298	1.1819	1.12896
2.86955	1.62029	1.15132
3.49213	5.29661	1.57985
1.64555	2.36045	1.21418
2.60169	1.08865	1.18471
1.11511	1.98901	1.10775
2.65659	3.2813	4.97132
1.58462	3.37765	1.53389
2.90203	1.86136	1.13095
1.82927	4.2218	2.42377
3.39179	3.43256	1.38122
2.27954	1.50479	1.26997
2.20316	1.93936	1.10818
3.22232	2.65819	2.59093
1.09599	2.8895	1.01545
3.29008	3.74768	1.08401
3.60274	4.39059	1.02564
3.99505	4.04624	1.25614
3.12287	6.47993	1.41535
3.94327	2.73363	1.22019
2.41372	1.4966	2.26645
1.54682	1.03187	3.66279
3.77553	1.77305	1.01215
2.40271	2.1525	1.01458
4.26379	2.06074	1.73965
2.74768	2.66097	1.06667
1.48165	2.75064	6.80934
4.83034	2.3763	1.28755
5.82871	2.52169	3.1346
4.0226	2.7236	1.15274
2.75965	1.41271	3.31203
5.3297	4.66775	1.0906
5.17906	3.02182	1.19119
1.11989	2.86597	1.34946
3.38183	5.3207	1.32353
1.0043	2.01541	1.10273
1.92145	4.16998	1.0287
1.58818	1.60442	8.55379
1.69834	2.74968	1.18534
4.19231	4.16198	1.03681
3.02339	3.38983	2.72858
2.74485	2.09069	1.05394
3.09406	5.16296	2.07612
2.11534	3.24797	1.95489
3.01288	5.57974	1.47059
3.56693	2.08403	1.25614
1.30817	2.40525	1.27226
1.76646	3.79388	1.1811
1.52355	2.65589	1.28342
4.27578	3.72563	1.14046
1.8929	3.99754	2.8028
3.61233	1.84469	1.35287
4.94241	4.15872	1.29781
3.07882	1.80798	1.2012
2.75967	1.35042	1.21145
1.5854	4.36764	1.08857
3.92458	1.95122	1.27193
1.39653	3.25858	2.97915
3.63636	2.77572	1.10677
3.05573	3.15679	2.1041
1.15188	2.9794	2.32227
2.85346	1.26263	1.2
3.65577	2.68695	1.49463
1.54398	1.4946	2.7959
2.75333	4.4884	1.63424
2.53918	4.39655	1.53183
3.60077	3.09206	1.18624
2.1085	1.12281	1.40637
1.39068	2.39823	1.20548
1.34112	2.75017	6.93916
4.27003	4.7865	2.37877
2.7956	2.18651	6.34921
1.9498	2.31959	1.00111
1.41796	2.01623	1.0989
1.31703	3.31461	1.30862
3.35301	4.09277	3.19511
1.55971	2.26345	1.16414
1.92423	4.86085	5.31053
1.50512	1.63059	1.03093
4.84118	1.87281	1.44377
2.74026	3.74858	1.20907
1.43198	3.2379	1.25065
1.7931	2.69441	1.10497
1.52778	4.0719	8.26816
2.99879	1.51095	1.97327
3.16506	2.08333	2.02977
1.10127	2.30312	2.01192
3.4632	1.93966	1.2848
3.51866	3.7979	2.89389
4.11949	2.34375	2.39316
2.94923	3.29317	1.17509
4.13032	2.49829	5.94406
1.65746	2.33386	1.27315
3.17304	4.30063	4.58716
2.93199	3.58774	1.42303
3.80019	4.11537	1.23288
3.27649	1.13905	1.11111
3.29803	1.84029	1.47162
3.97506	2.34962	1.04987
3.18443	5.56586	1.31195
4.26883	2.67622	1.39771
2.92826	3.18218	1.78881
4.06964	3.98927	2.39554
1.85996	2.94008	1.19126
3.20045	3.93748	1.99203
3.39065	3.94687	2.0979
2.32265	2.07364	2.5489
2.32211	3.7373	1.91293
3.16059	3.40611	1.14286
1.31991	3.4504	2.14592
2.58907	2.40878	1.66205
4.33343	1.81305	1.41213
4.32774	1.77425	1.33648
3.51719	5.28376	1.32589
4.16762	2.84553	1.6158
1.86587	1.52672	3.82206
3.50621	2.98466	2.0625
3.01508	2.82132	2.84168
1.4698	2.29676	5.11811
3.30024	3.05882	1.17705
3.10165	6.62848	3.14784
2.57556	1.68931	2.49221
1.8681	1.51206	1.07759
1.28755	3.4375	1.33958
2.28337	2.20488	1.11046
2.33621	2.65176	1.16754
3.20055	3.40772	1.53959
2.14839	2.68405	1.39918
3.97495	2.22283	1.41921
2.75718	1.34966	1.61399
2.49814	2.75591	1.60041
1.46823	4.81977	1.58491
1.15691	2.62123	1.10605
2.77715	3.51993	1.00566
2.0649	4.64081	2.1861
3.1679	5.02842	1.19729
1.20802	4.96215	1.12094
2.6195	2.55965	4.28485
1.1675	2.41139	1.52778
3.98318	4.25948	1.77066
2.70477	3.39054
3.40877	2.84891
4.10897	2.6445
2.08449	1.4333
3.06943	2.39635
1.41361	2.19702
4.06523	1.23239
2.79397	3.63361
1.58896	5.69927
3.1257	3.70501
1.80273	6.82288
3.44288	3.7037
5.84259	4.4345
2.82896	3.33943
3.28912	2.77676
2.44726	2.07125
2.63302	3.17906
2.07561	3.207
3.97966	1.57549
3.0564	2.4369
2.8527	3.26162
3.46792	3.46924
3.27415	1.75234
2.97521	2.85307
2.5096	4.36035
2.55923	2.94802
2.2269	1.71062
1.97775	4.49915
3.5896	2.65325
3.36692	2.38095
2.3036	1.78143
2.74028	3.1401
3.31811	4.9542
2.57437	2.67615
1.98342	2.95608
3.22507	3.04617
2.52772	4.09628
1.08108	4.35613
1.01656	2.08078
1.62464	1.07784
5.15045	2.35162
3.95236	2.15589
1.50571	1.92638
3.61032	2.59291
3.05387	3.29541
4.63761	2.06343
3.06496	2.20619
2.80143	1.21478
3.36693	4.45545
2.93765	2.79538
1.09479	2.05429
1.05462	3.0597
3.63008	2.28385
1.85885	1.00069
2.23614	3.69546
2.30415	2.27367
2.74054	3.02626
2.45307	4.53915
1.74649	2.01097
2.16816	2.74232
2.1978	2.4579
1.64516	4.04362
3.78345	4.43442
2.8169	2.22119
3.30739	2.39756
2.20462	2.55319
2.08184	3.05221
3.98329	3.21065
3.33868	1.42857
3.32056	1.72944
2.68817	4.72371
1.69545	1.67981
4.12858	1.82799
3.1556	7.327
1.84957	3.08234
3.81089	2.31523
2.93215	5.15832
5.73134	3.65653
4.49948	2.82561
2.06098	1.4911
2.29047	4.70639
2.10268	1.96309
3.99068	2.7027
4.78562	1.93599
3.0321	1.57368
2.28789	2.42684
3.55882	3.21608
1.7497	2.61851
1.9722	2.48668
3.78164	3.21987
3.86546	2.81398
2.60195	5.41516
2.35328	4.65116
4.05359	2.12691
1.41947	3.13661
3.27692	3.94796
1.69306	3.31018
4.28449	1.64131
2.04649	5.61072
3.2967	3.65548
4.08163	4.73269
3.32438	1.43939
2.52543	2.79441
3.80507	3.24859
3.09176	1.67615
2.74117	4.47631
1.72597	1.24242
3.4465	1.98083
3.12594	2.84302
1.63934	1.10159
1.01946	3.60825
1.94805	1.15975
2.06298	4.76008
3.28901	2.58621
2.88462	3.00626
3.29025	5.59633
3.77049	2.89946
4.91525	3.91633
4.66238	1.49919
2.46749	2.50798
4.28832	1.6586
2.46143	2.32824
3.00657	2.12121
2.34726	5.51378
3.18642	2.19665
4.64569	2.85433
3.72891	4.81069
2.62954	3.61871
2.76869	2.55319
3.92014	2.84341
3.76195	2.91333
3.77907	3.59807
3.20936	4.13294
2.48272	1.9922
3.19228	3.45765
2.04638	4.8768
2.43829	1.72775
3.42528	1.21744
3.03831	1.47689
3.69155	3.86997
3.50548	5.82227
3.02158	3.28344
3.22974	4.21658
3.32851	3.78855
1.94305	2.24252
2.44969	1.84544
4.28473	3.09091
2.96996	2.29226
2.37643	3.43671
2.47492	4.73956
1.79744	3.81175
2.08877	3.2667
2.18597	3.07368
1.05506	3.7159
2.27167	4.73836
2.76604	2.85143
1.47006	3.0465
2.76725	1.02948
2.8063	2.94251
2.68741	2.41719
1.30271	2.51323
2.98425	1.9966
1.58674	2.00273
2.73155	2.17289
3.34838	1.30143
2.45156	3.06748
4.32432	4.09329
2.72835	2.91103
2.54491	3.54803
3.00292	2.56601
3.29535	2.68528
4.24149	3.55537
3.34682	2.60572
1.70689	3.99641
2.10435	2.88779
4.89671	2.26365
3.34545	2.63004
2.41826	1.95284
1.34155	2.35183
1.96515	3.51546
4.78336	5.6243
3.54116	1.5103
3.09687	2.36638
3.97614	4.23658
2.0182	2.98507
2.52324	3.55355
2.97816	2.38876
3.09551	3.90909
2.22581	3.13273
5.62993	2.35988
5.32773	3.13883
3.32031	2.26119
4.09042	3.27952
2.0641	1.64681
4.04798	5.30928
3.79507	2.10925
3.32155	3.62319
3.36197	3.75908
1.03052	3.66882
2.77228	4.85651
3.24149	3.82736
2.61419	1.52979
1.37584	3.23152
2.4542	3.08137
1.76525	1.03464
2.91971	2.29592
2.53879	3.76897
3.36994	4.14594
2.14256	3.28947
2.51219	3.26763
3.33802	3.31565
2.676	1.83727
5.7187	2.00114
3.4495	4.33175
3.96941	2.97578
2.88573	3.93258
3.36195	3.31992
3.34653	3.81755
3.58821	3.23149
2.55119	2.60913
1.12269	3.07305
3.79587	2.00837
1.7179	6.2908
2.84341	3.20632
3.48584	4.31584
3.74691	3.89194
3.94837	3.04848
4.72795	1.6458
3.33333	3.18607
1.40605	5.80222
2.19601	1.51384
3.36283	3.31522
2.23102	3.79925
2.02977	3.65488
2.24448	3.07385
1.52266	5.80383
4.79963	2.69642
2.31542	4.59071
2.14521	3.28917
3.85208	2.11538
3.61388	1.43443
3.33761	3.18363
5.04769	4.19075
1.14269	1.04877
2.64973	3.95921
3.74807	2.06961
2.17729	1.79949
2.07089	1.24688
2.07743	3.20481
2.89483	2.34412
3.74486	5.79853
3.49363	2.70104
2.75618	1.37615
3.84615	4.3222
4.41703	5.3656
3.65989	4.20168
2.20281	2.43161
3.09183	4.54545
3.44953	3.88395
2.75942	1.04218
3.41365	1.77725
1.1985	6.21176
2.64865	2.69271
1.77566	1.71804
2.6764	2.71493
3.17235	1.29032
3.08835	1.11203
3.39419	2.55896
4.29636	3.9782
4.17732	3.54442
3.47092	2.64984
4.12324	2.14576
1.63317	2.59179
3.20641	6.75453
2.29211	5.19894
4.50185	3.27198
3.4252	3.72973
1.45875	3.77562
1.62382	2.20312
6.1734	4.02844
3.76656	2.43056
4.21528	4.98986
3.94412	2.34134
1.65129	4.86459
4.16667	2.27493
1.34146	2.43619
2.56927	3.61174
1.33268	3.17826
3.20879	5.03432
2.58869	4.70281
3.11741	1.70085
3.64527	3.70977
2.62113	1.55131
2.57336	3.00789
2.67192	2.04348
3.37375	2.85576
2.75229	3.57668
2.11406	6.56077
4.59433	4.21748
5.49828	4.40771
2.81215	1.03034
6.14502	2.61599
3.34432	3.31492
1.15546	4.95985
7.28673	5.52017
2.51386	1.38481
1.50888	3.46232
3.78406	2.38791
5.22425	3.18747
4.51676	5.28512
4.75537	2.9375
1.11993	2.00978
4.02605	1.02302
4.02204	5.10526
5.24272	2.1412
3.7037	2.09372
3.39958	2.08439
3.40807	3.80117
1.41973	1.37893
4.95283	2.52694
2.57143	2.9035
3.65488	3.32865
3.93655	4.41989
4.08497	3.05907
2.34455	2.00182
1.68902	2.51816
3.135	2.14787
2.86952	2.03837
1.62519	2.59032
2.55296	4.51757
5.98632	4.83271
3.14645	3.27409
3.02843	4.93388
2.04	4.85269
4.00493	3.03712
3.43454	1.04167
1.69851	2.5
3.67787	3.8569
3.33148	2.09318
5.65302	3.67347
2.46305	5.01654
4.56461	3.33863
2.49392	3.3404
3.44362	3.10734
3.8501	3.67876
1.81319	2.77778
3.35917	1.28894
2.94118	2.79146
2.83133	4.02299
4.26727	3.97727
3.70595	2.5371
1.66271	3.18504
1.48057	1.39121
1.05687	3.54645
2.65687	3.38892
2.29062	3.07874
3.24351	3.24892
1.09815	3.48145
2.27545	2.12545
5.54415	5.45194
4.4626	4.00239
4.04241	4.27206
2.77463	3.35642
9.77522	3.28344
3.12989	5.24131
4.00593	3.31311
2.58569	5
2.48167	4.11194
3.29154	3.42857
2.74648	1.79487
1.73299	2.38219
1.17647	3.01054
4.18071	2.35138
1.97711	3.66109
3.04124	1.58451
5.09363	3.14396
2.06061	1.38138
4.09894	1.76471
3.31288	1.63265
2.35586	4.52459
4.1184	2.08209
2.02887	2.80837
4.18027	3.61771
2.08034	1.79935
3.97269	2.37107
4.41281	5.38922
1.71192	2.66667
2.62803	5.84256
2.02186	3.63843
1.38037	2.25989
1.4366	2.86567
2.48356	5.78718
1.44049	3.06825
2.79923	2.80932
1.74338	3.92623
1.4435	5.97826
2.30238	5.85507
1.64349	3.88298
1.84758	3.69708
2.05339	4.71331
1.15163	4.55128
1.64448	4.30168
2.33503	2.99936
1.69238	3.77721
1.01229	2.4177
3.07263	4.43847
2.37184	3.01543
1.82648	2.83944
1.79775	2.66963
1.27119	2.9132
3.25543	3.31492
1.30841	2.52409
1.16906	3.94381
1.40637	3.39196
1.72563	3.81737
1.33146	5.97403
3.19361	4.59325
1.83544	3.08057
2.85088	4.65929
1.91749	5.46928
1.9979	1.10396
5.53191	3.16109
4.95929	3.71081
2.70575	2.44989
1.14114	4.03946
6.9869	3.64656
2.16418	3.11082
1.63424	1.42936
2.81195	1.88406
3.08692	3.60183
2.46775	7.73515
4.01949	1.24922
1.18343	2.51429
1.22214	2.43902
1.16883	1.69915
2.2787	2.54144
1.74216	2.48786
1.92102	5.87906
1.01523	4.01722
1.21495	4.29688
2.30592	2.53165
1.83166	4.71642
2.94931	4.04942
1.01449	2.15343
1.08883	2.97965
2.50216	3.64635
3.61011	3.45026
5.92593	2.41125
1.7341	5.21018
2.42131	3.67691
1.14155	2.67286
1.14068	4.4659
2.62258	4.88621
1.6129	5.93932
2.95567	4.14938
3.25694	3.81455
1.84995	2.12235
4.1514	4.18502
1.95713	4.29234
1.11046	3.48071
2.81407	1.18265
2.53046	1.45215
2.3918	3.11564
1.92813	5.72745
1.73913	2.80528
4.78905	3.65927
2.0284	2.51329
2.15898	3.7037
1.38004	3.31872
1.1432	2.08333
2.81553	3.22785
1.98251	1.08959
1.54686	3.86043
2.2194	2.39822
1.36411	2.35969
1.42591	3.87382
1.71026	2.61745
2.18978	1.39373
3.33731	3.08518
1.38568	4.94743
2.57787	2.76775
2.00669	4.87988
2.40722	2.27412
1.8	3.4555
1.18074	2.92011
2.29358	3.05344
1.68484	2.12492
1.60237	1.91799
1.57993	7.75623
1.17967	4.08451
1.0989	2.21987
2.46154	5.00263
1.15924	2.37028
1.43084	3.44451
1.12493	2.97984
2.44648	7.04846
1.05003	1.21693
1.7758	2.98088
1.6	2.9724
1.02652	2.9726
1.78849	1.11836
1.39738	3.20417
4.85356	5.7936
1.34228	1.98494
1.18606	3.89922
1.27011	2.32358
1.52672	6.27907
1.16422	2.59658
	2.20234
	1.92857
	3.50318
	2.59155
	4.88827
	3.54034
	2.56137
	3.1769
	2.57766
	6.23291
	6.07815
	2.42241
	5.72626
	2.83073
	2.38832
	1.30058
	2.54777
	4.22535
	2.03822
	1.22567
	5.16039
	2.00138
	3.71303
	3.52941
	2.66204
	4.58199
	4.16368
	4.39315
	4.05585
	5.30201
	2.5344
	3.86445
	8.17477
	3.1451
	3.10136
	5.68384
	1.70388
	3.74359
	3.31781
	4.6042
	2.32333
	3.68664
	2.78766
	2.61628
	3.03594
	3.17231
	3.39681
	3.91779
	2.21066
	2.00129
	3.71353
	1.04022
	4.426
	4.17193
	9.76971
	3.17572
	5.73248
	4.9635
	2.35988
	4.36187
	3.3237
	3.19728
	3.20563
	2.05438
	5.86026
	3.23552
	1.31471
	2.46277
	5.0217
	3.21038
	4.50346
	1.38436
	1.21704
	3.20974
	3.79427
	5.63492
	1.16989
	4.73164
	2.59336
	3.08678
	2.32708
	1.64794
	3.04423
	1.61022
	3.16456
	3.16456
	2.40192
	3
	3.67545
	2.32836
	2.54176
	1.28079
	1.06545
	1.0453
	2.52738
	3.09343
	4.71842
	4.62606
	1.00847
	1.05356
	4.66128
	5.70962
	3.2481
	2.55864
	2.53731
	7.0598
	5.07781
	5.47445
	3.93596
	3.62595
	2.75482
	5.33333
	7.04
	5.83516
	3.98162
	2.55906
	4.27227
	3.52782
	6.35674
	1.26336
	2.8133
	2.16509
	2.80095
	3.11309
	2.13946
	3.94089
	1.18519
	3.34962
	1.6
	4.13284
	3.3189
	2.86944
	4.17434
	1.00942
	3.23115
	2.01748
	3.64166
	1.54242
	1.22744
	4.5843
	4.31918
	6.51491
	1.49961
	2.89017
	1.30368
	3.38442
	4.08674
	5.30435
	1.18402
	3.51134
	3.60825
	5.63094
	3.24207
	5.10033
	3.66492
	1.74723
	5.49828
	4.27397
	3.27662
	4.73458
	2.47989
	1.17536
	1.0043
	2.21914
	4.33159
	5.35144
	2.35889
	3.36538
	3.50982
	4.11184
	2.00647
	3.4626
	3.02831
	2.74859
	2.58807
	4.09786
	2.62803
	3.77778
	3.79747
	6.05096
	2.54237
	4.64939
	2.77569
	1.85529
	4.23661
	1.40741
	3.49279
	1.30506
	1.37615
	4.74504
	2.04082
	2.75292
	3.01887
	4.48384
	2.5721
	3.15249
	3.74415
	2.30453
	4.10584
	6.85335
	3.66748
	4.88215
	2.81981
	2.4055
	2.89757
	4.87433
	1.36337
	2.22985
	2.98137
	2.06398
	2.88529
	4
	4.22961
	2.34742
	7.12166
	3.78984
	4.65465
	3.33333
	4.79616
	6.38686
	4.06321
	4.55617
	4.17495
	1.9039
	2.9703
	2.6428
	2.92533
	1.90311
	5.88776
	3.13029
	3.01255
	3.11787
	3.4153
	4.41306
	3.96127
	4.971
	1.45985
	2.77575
	3.61248
	3.29257
	3.45745
	4.23529
	2.87173
	5.87695
	5.50847
	2.37087
	1.54616
	3.66057
	6.82226
	4.78293
	2.17549
	2.20459
	3.34928
	1.92024
	4.55635
	4.22886
	3.73563
	1.78253
	2.87632
	2.77778
	3.61068
	3.40074
	3.73066
	1.65074
	3.125
	3.55212
	1.89166
	4.0404
	2.86182
	2.62681
	6.1194
	3.75123
	2.95291
	4.80065
	8.83219
	5.24017
	2.67686
	2.03453
	3.00395
	3.81206
	5.08757
	1.55616
	4.83333
	2.84939
	5.18653
	2.65353
	1.54083
	2.68551
	3.16678
	5.13834
	4.23453
	1.37457
	4.88959
	2.97572
	4.14781
	5.84588
	3.10078
	4.2915
	2.91096
	3.44551
	3.79487
	1.16801
	2.5
	3.84294
	2.15139
	4.15945
	2.36518
	3.71058
	3.40454
	1.03175
	1.47287
	2.95736
	6.28684
	4.40816
	3.15457
	3.72425
	5.06208
	2.32333
	5.82691
	6.02837
	3.76923
	2.53566
	4.48155
	6.00962
	5.23897
	1.38741
	1.34576
	4.93827
	1.5948
	4.81283
	2.693
	1.78571
	2.53521
	3.34608
	2.39268
	4.65477
	8.95349
	4.4505
	4.14365
	3.63101
	4.80962
	2.91181
	8.4058
	2.83757
	2.25428
	1.77332
	7.01048
	2.45442
	4.00314
	3.04077
	2.73775
	1.91987
	5.96078
	3.85375
	3.53698
	5.14139
	2.30991
	3.95108
	3.40587
	2.06897
	5.80504
	2.43137
	5.10106
	4.33039
	6.65323
	3.4588
	1.60692
	3.29392
	2.31267
	2.18182
	2.49027
	2.54885
	2.22576
	3.25733
	1.43756
	2.2929
	2.71248
	4.31655
	3.3107
	1.06838
	5.94694
	3.51438
	3.86313
	3.18841
	5.07099
	3.99361
	3.4291
	4.31732
	2.81307
	2.8436
	2.40427
	4.19214
	2.95203
	1.90789
	3.05927
	8.32536
	4.32526
	2.81008
