# Supplementary material for: Single-cell RNA-seq analysis reveals penaeid shrimp hemocyte subpopulations and cell differentiation process
Source: eLife. 2021 Jun 16;10:e66954. doi: 10.7554/eLife.66954 (PMC8266392; doi:10.7554/eLife.66954)
Supplement: Figure 2—source data 1. [file elife-66954-fig2-data1.xlsx]

## Sheet: Figure 2ABC
Source data file for Figure 2A,B,C
Single-cell RNA-seq analysis reveals penaeid shrimp hemocyte subpopulations and cell differentiation process
Keiichiro Koiwai a, b, *, Takashi Koyama c, d, Soichiro Tsuda e, Atsushi Toyoda f, Kiyoshi Kikuchi c, Hiroaki Suzuki g, Ryuji Kawano a
a Department of Biotechnology and Life Science, Tokyo University of Agriculture and Technology, Koganei, Tokyo 184-8588, Japan
b Laboratory of Genome Science, Tokyo University of Marine Science and Technology, Minato, Tokyo, 108-8477, Japan
c Fisheries Laboratory, Graduate School of Agricultural and Life Sciences, The University of Tokyo, Hamamatsu, Shizuoka 431-0214, Japan
d Graduate School of Fisheries and Environmental Sciences, Nagasaki University, Bunkyo-machi, Nagasaki, Nagasaki 852-8521, Japan
e bitBiome Inc., Waseda University Incubation Center, Nishiwaseda, Shinjuku, Tokyo 169-0051, Japan
f Advanced Genomics Center, National Institute of Genetics, Mishima, Shizuoka 411-8540, Japan
g Department of Precision Mechanics, Faculty of Science and Engineering, Chuo University, Bunkyo, Tokyo 112-8551, Japan
*To whom correspondence should be addressed. Email: koiwai@kaiyodai.ac.jp
The number of transcripts per cell	The number of genes per cell	The percentage of mitochondrial genes per cell
12038	3767	2.76624
12129	3724	2.39921
11911	3896	2.03174
10092	3694	3.3591
11509	3989	3.5103
11022	3768	2.65832
9811	3680	1.89583
10345	3415	3.00628
10303	3862	3.4456
9401	3296	2.88267
10460	3917	2.90631
11384	3839	3.2941
9474	3361	1.15052
9420	3938	3.1104
8690	3649	2.96893
10236	3536	3.79054
9097	3522	3.00099
10109	3630	2.35434
9502	3697	2.77836
9415	3746	3.12268
9368	3770	3.41588
9374	3447	3.81907
9645	3576	3.81545
8523	3468	2.37006
8597	3443	2.40782
8713	3506	4.48755
9949	3676	3.13599
9328	3188	2.0476
10044	3539	3.64397
8121	3010	2.85679
8668	3481	3.34564
8063	3541	3.53466
9345	3234	1.71215
8433	3336	3.64046
7996	3828	2.86393
8017	2988	1.08519
8947	3785	2.86129
8074	3622	4.14912
7780	3635	3.40617
8544	3648	2.75047
8232	3368	2.74538
8693	3813	3.38203
8325	3203	1.42943
8381	3462	3.9852
8047	3384	1.11843
8291	3099	3.5822
8753	3291	2.19353
8803	3346	2.8513
8240	3448	3.78641
7882	3251	3.70464
7964	3143	1.31843
8506	3608	3.17423
8138	3648	4.03047
7120	2872	2.28933
7713	3381	7.81797
7713	3168	3.81175
7758	3500	2.21707
7408	3146	3.18575
9222	3720	2.42897
7176	3317	2.02062
7835	3558	4.28845
6760	2852	3.09172
8124	3239	3.54505
7988	3625	1.69004
7499	3263	2.89372
6973	3055	3.44185
8082	3323	1.47241
7938	3321	1.29756
10410	3936	2.58405
7181	3355	2.75728
7026	3014	2.74694
8447	3201	3.26743
6983	2685	1.40341
7499	2860	2.29364
6832	2517	2.62002
8033	3789	2.96278
7353	3442	3.65837
7411	3551	3.06301
7210	3232	4.50763
7424	3037	4.45851
7328	3160	4.08024
8165	2615	1.77587
7597	2896	1.57957
8087	2987	1.36021
6513	2789	2.7637
7342	3421	1.13048
6892	3094	1.9733
7399	2710	1.82457
8145	3244	2.45549
7192	3140	1.80756
6635	2476	2.14017
6798	3170	4.41306
6480	2840	3.14815
6068	2565	3.62558
6682	2585	1.90063
6517	2795	3.29906
7272	3349	3.64411
6531	2835	2.35798
6756	3166	3.93724
7512	2470	1.69063
7165	2723	1.85625
6884	2995	3.86403
6922	3159	2.45594
6801	3248	2.27908
7347	2934	2.39554
6939	3426	2.10405
6895	3112	3.29224
6602	2478	1.80248
7344	2763	2.23312
7938	3119	2.28017
7070	2731	2.843
5977	2500	2.50962
7039	2851	1.9463
6655	2956	3.60631
5650	2714	3.15044
6992	3011	4.04748
6694	2807	2.94293
7810	3648	2.79129
6114	2470	2.895
7244	2834	2.76091
6012	2562	3.80905
6330	2666	4.62875
7694	3485	1.20873
7334	3114	3.12244
7423	3334	3.07153
6760	2189	1.36095
6622	2508	1.96315
6839	3161	3.23147
6591	2927	4.06615
6745	3194	4.46256
5836	2442	1.83345
6161	2736	4.67457
6289	2806	3.24376
6680	2764	2.93413
6546	2818	2.84143
5943	2887	2.33889
6663	3002	3.61699
5790	2819	2.17617
6743	2659	3.08468
6192	2461	2.03488
6334	2669	2.9839
6908	2925	3.76375
7086	3031	3.58453
6349	2848	3.79587
6063	2952	3.89246
6351	2703	2.55078
5861	2683	3.75363
6799	2474	2.1915
6917	2765	2.8336
5670	2399	1.71076
6169	2733	1.6048
5832	2501	2.88066
6043	2779	4.46798
6355	2526	3.58773
5375	2328	1.24651
5753	2253	1.16461
6270	3146	2.71132
5692	2312	2.35418
6285	2921	2.32299
5875	2666	2.60426
5522	2591	2.73452
6731	2860	3.66959
5590	2558	2.54025
7013	2915	1.28333
7255	2694	2.72915
6260	2842	3.72204
5918	2384	2.17979
12282	3450	1.50627
5743	2696	3.09943
6556	2585	1.49481
5751	2674	4.78178
6382	2626	3.88593
5072	2446	2.68139
5522	2366	2.22745
5817	2418	4.53842
6692	2995	4.57262
5524	2180	1.97321
5662	2528	2.71989
6055	2772	2.19653
6015	2354	2.36076
6120	2765	2.30392
5644	2573	2.99433
5393	2214	3.13369
6524	2877	1.60944
6561	2771	4.03902
5480	2629	4.17883
5524	2219	2.95076
5346	2400	1.14104
5884	2852	3.87492
5864	2648	3.12074
6275	2687	4.14343
6307	2451	3.94799
5464	2742	4.72182
5200	2601	1.82692
6198	2442	2.4524
5281	2530	3.12441
5658	2547	3.53482
5777	2804	4.29289
5606	2802	3.44274
5766	2701	3.71141
6366	2199	2.15206
6634	2768	2.41182
5088	2404	1.98506
5611	2575	2.85154
6149	2206	3.13872
5428	2390	3.35298
6024	2924	2.67264
5421	2700	3.44955
5725	2120	1.48472
6017	2666	4.20475
5616	2325	2.75997
6231	2657	3.43444
5569	2575	4.2557
5141	2292	3.01498
6741	2500	2.09168
5810	2385	3.54561
5858	2670	3.43121
6179	2206	2.31429
7057	2830	2.25308
6067	2219	2.6537
5430	2252	1.84162
5245	2327	3.39371
6007	2631	3.19627
5784	2638	4.35685
5543	2568	2.72416
5342	2495	2.63946
5347	2412	3.85263
6449	2736	3.56644
5387	2320	3.23
5275	2238	1.51659
5280	2513	3.6553
4589	1889	2.46241
5013	2686	2.67305
5278	2335	1.57257
5243	2441	2.9754
5293	2366	2.645
5139	2309	2.70481
5189	2575	3.0449
5116	2515	2.15012
4789	2227	3.32011
4662	2171	5.31961
5268	2101	1.68945
5559	2274	1.69095
4980	2398	3.83534
4977	1996	2.1298
5297	2443	2.86955
4954	2451	3.49213
5287	2143	1.64555
5458	2415	2.60169
5829	2395	1.11511
4630	2260	2.65659
4733	1903	1.58462
5410	2706	2.90203
5740	2424	1.82927
5189	2534	3.39179
6668	2736	2.27954
5129	2532	2.20316
5555	2212	3.22232
5292	2396	1.09599
4316	1990	3.29008
5246	2652	3.60274
5657	2667	3.99505
5860	2772	3.12287
5782	2567	3.94327
5013	2434	2.41372
4784	2133	1.54682
4847	2264	3.77553
5910	2776	2.40271
5277	2527	4.26379
5168	2294	2.74768
4387	1886	1.48165
5010	2457	4.83034
5044	2295	5.82871
4425	2069	4.0226
5363	2551	2.75965
5141	2390	5.3297
5445	2566	5.17906
4554	2057	1.11989
5086	2257	3.38183
4879	2308	1.0043
4736	2288	1.92145
5415	2105	1.58818
4946	2374	1.69834
5200	2503	4.19231
5259	2411	3.02339
4809	2395	2.74485
4848	2143	3.09406
4491	2130	2.11534
5045	2494	3.01288
4766	2418	3.56693
4663	2170	1.30817
4359	2210	1.76646
4332	2254	1.52355
4888	2408	4.27578
6181	2548	1.8929
4540	1985	3.61233
4775	2284	4.94241
4872	2483	3.07882
4602	2002	2.75967
4163	1737	1.5854
4561	2145	3.92458
4726	2455	1.39653
4730	2186	3.63636
4647	2155	3.05573
4688	2095	1.15188
4661	2167	2.85346
4404	2290	3.65577
6412	2663	1.54398
4431	2001	2.75333
5041	2225	2.53918
4138	1998	3.60077
4885	2179	2.1085
3883	1861	1.39068
4623	2222	1.34112
4918	2326	4.27003
4364	2149	2.7956
4462	1676	1.9498
4443	1720	1.41796
4252	2224	1.31703
4235	2211	3.35301
4488	2285	1.55971
4989	2117	1.92423
4983	2338	1.50512
4565	2481	4.84118
5109	2346	2.74026
4190	2240	1.43198
5075	2325	1.7931
4320	2145	1.52778
4135	1818	2.99879
4992	2159	3.16506
4177	1916	1.10127
4389	2212	3.4632
5144	2518	3.51866
4151	1785	4.11949
4747	2075	2.94923
3898	2064	4.13032
4525	2114	1.65746
5074	2310	3.17304
4161	1926	2.93199
4184	1929	3.80019
5219	2147	3.27649
4154	2095	3.29803
3849	2112	3.97506
4522	2183	3.18443
4568	2199	4.26883
4098	1986	2.92826
4423	2007	4.06964
4570	2013	1.85996
5343	2555	3.20045
4129	2104	3.39065
3961	1995	2.32265
4694	2347	2.32211
4303	1818	3.16059
4470	2082	1.31991
4210	2110	2.58907
3623	1954	4.33343
4113	1873	4.32774
5004	2412	3.51719
4367	2118	4.16762
3698	1684	1.86587
4107	2060	3.50621
3582	1820	3.01508
3742	1738	1.4698
3727	2092	3.30024
4417	2078	3.10165
3805	1872	2.57556
3533	2043	1.8681
3961	1516	1.28755
3416	1707	2.28337
3938	1673	2.33621
4343	2202	3.20055
4003	1889	2.14839
4151	2122	3.97495
4316	2147	2.75718
4043	1927	2.49814
3746	1787	1.46823
4149	1582	1.15691
4393	1642	2.77715
4068	1895	2.0649
3788	1942	3.1679
4139	1830	1.20802
3703	1983	2.6195
4197	1976	1.1675
4519	2062	3.98318
3919	1913	2.70477
3491	1916	3.40877
4405	2151	4.10897
3598	1822	2.08449
4105	1945	3.06943
3820	1702	1.41361
4354	2027	4.06523
4116	2220	2.79397
3839	1736	1.58896
4447	2113	3.1257
3883	1811	1.80273
4473	2007	3.44288
4142	1729	5.84259
3853	2031	2.82896
3770	1911	3.28912
3555	1718	2.44726
3646	2013	2.63302
4047	1815	2.07561
4523	2126	3.97966
3599	1829	3.0564
3856	2065	2.8527
4037	2049	3.46792
4337	2021	3.27415
3630	1940	2.97521
3387	1401	2.5096
5783	2138	2.55923
3323	1801	2.2269
3236	1595	1.97775
3538	1837	3.5896
4069	1944	3.36692
3386	1986	2.3036
4963	2399	2.74028
4159	2095	3.31811
3496	1875	2.57437
3378	1509	1.98342
4403	2063	3.22507
4510	2105	2.52772
3330	1354	1.08108
3443	1690	1.01656
4124	1800	1.62464
3689	1780	5.15045
3694	1819	3.95236
3852	1931	1.50571
3490	1684	3.61032
3471	1806	3.05387
4291	2101	4.63761
4372	2209	3.06496
3641	1774	2.80143
4663	2142	3.36693
3336	1840	2.93765
3745	1323	1.09479
3698	1717	1.05462
3471	1548	3.63008
3174	1736	1.85885
3354	1611	2.23614
3906	1928	2.30415
3357	1867	2.74054
4688	2017	2.45307
3779	1693	1.74649
3782	1929	2.16816
2912	1483	2.1978
3100	1343	1.64516
3251	1690	3.78345
3621	2004	2.8169
4626	1920	3.30739
2903	1567	2.20462
4179	1761	2.08184
3590	1860	3.98329
3744	1920	3.33868
3132	1731	3.32056
3348	1731	2.68817
3185	1587	1.69545
3391	1777	4.12858
3676	1750	3.1556
3244	1401	1.84957
3490	1785	3.81089
2933	1486	2.93215
3350	1690	5.73134
2867	1447	4.49948
3542	1542	2.06098
3842	1953	2.29047
3662	1535	2.10268
3433	1734	3.99068
3615	1885	4.78562
3364	1708	3.0321
3147	1610	2.28789
3681	1824	3.55882
3372	1507	1.7497
3093	1432	1.9722
3279	1742	3.78164
3984	1940	3.86546
3997	1925	2.60195
3442	1501	2.35328
2911	1556	4.05359
3452	1813	1.41947
2777	1468	3.27692
3662	1683	1.69306
3501	1855	4.28449
3958	2046	2.04649
4095	2051	3.2967
3283	1633	4.08163
2978	1450	3.32438
2851	1582	2.52543
2996	1568	3.80507
3008	1533	3.09176
3794	2002	2.74117
3766	1579	1.72597
3888	1845	3.4465
3327	1695	3.12594
2867	1503	1.63934
3237	1385	1.01946
4158	1694	1.94805
3684	1746	2.06298
2858	1551	3.28901
3432	1674	2.88462
3404	1800	3.29025
3050	1558	3.77049
3540	1851	4.91525
3110	1430	4.66238
2999	1500	2.46749
3288	1493	4.28832
2722	1309	2.46143
3958	1656	3.00657
2897	1258	2.34726
3358	1724	3.18642
3401	1781	4.64569
3379	1735	3.72891
3879	1898	2.62954
3973	1844	2.76869
4107	2026	3.92014
3243	1828	3.76195
2752	1444	3.77907
3334	1691	3.20936
3182	1846	2.48272
2694	1316	3.19228
2932	1513	2.04638
3322	1714	2.43829
3299	1405	3.42528
3785	1919	3.03831
3657	1738	3.69155
3195	1695	3.50548
2780	1410	3.02158
3282	1643	3.22974
2764	1352	3.32851
2985	1458	1.94305
3429	1684	2.44969
2894	1484	4.28473
2963	1577	2.96996
3156	1450	2.37643
2990	1426	2.47492
2893	1266	1.79744
3830	1720	2.08877
3065	1740	2.18597
3033	1762	1.05506
4314	1816	2.27167
2603	1388	2.76604
2789	1468	1.47006
2638	1548	2.76725
2922	1541	2.8063
2828	1488	2.68741
2917	1588	1.30271
3619	1712	2.98425
2836	1338	1.58674
3185	1806	2.73155
2658	1420	3.34838
2529	1349	2.45156
3145	1503	4.32432
3372	1651	2.72835
2672	1445	2.54491
3430	1691	3.00292
3247	1622	3.29535
3230	1694	4.24149
2719	1478	3.34682
3398	1561	1.70689
3469	1777	2.10435
2614	1263	4.89671
2750	1291	3.34545
2936	1596	2.41826
2758	1199	1.34155
2697	1328	1.96515
2885	1298	4.78336
3304	1684	3.54116
2777	1469	3.09687
3018	1570	3.97614
2527	1462	2.0182
3012	1551	2.52324
3022	1600	2.97816
2649	1527	3.09551
3100	1577	2.22581
2913	1662	5.62993
2853	1554	5.32773
2560	1408	3.32031
2787	1498	4.09042
3682	1807	2.0641
2668	1524	4.04798
2635	1519	3.79507
2830	1428	3.32155
2677	1555	3.36197
2523	1334	1.03052
2525	1437	2.77228
3085	1675	3.24149
3481	1685	2.61419
2980	1273	1.37584
2893	1506	2.4542
3229	1532	1.76525
2466	1390	2.91971
2836	1492	2.53879
2641	1381	3.36994
2427	1490	2.14256
2667	1461	2.51219
2846	1493	3.33802
2429	1468	2.676
2588	1314	5.7187
2812	1562	3.4495
2746	1375	3.96941
2599	1359	2.88573
2796	1523	3.36195
2779	1529	3.34653
2341	1246	3.58821
2979	1497	2.55119
2494	1188	1.12269
2371	1200	3.79587
2212	1095	1.7179
2497	1215	2.84341
2754	1563	3.48584
2829	1456	3.74691
2634	1458	3.94837
2665	1389	4.72795
2760	1386	3.33333
2347	1329	1.40605
2459	1388	2.19601
2260	1415	3.36283
2779	1412	2.23102
2217	1061	2.02977
2896	1452	2.24448
2824	1210	1.52266
2146	1295	4.79963
2289	1206	2.31542
3030	1419	2.14521
2596	1291	3.85208
2103	1185	3.61388
2337	1241	3.33761
2516	1326	5.04769
6651	1525	1.14269
2755	1477	2.64973
2588	1375	3.74807
1929	1025	2.17729
2511	1504	2.07089
2118	1199	2.07743
2729	1391	2.89483
2430	1342	3.74486
2433	1469	3.49363
2830	1392	2.75618
2808	1346	3.84615
2513	1397	4.41703
2705	1431	3.65989
2633	1513	2.20281
2167	1248	3.09183
2754	1499	3.44953
2573	1429	2.75942
1992	1223	3.41365
4005	1553	1.1985
1850	1008	2.64865
2309	1145	1.77566
2055	1191	2.6764
2112	1229	3.17235
2558	1276	3.08835
3889	1482	3.39419
2281	1378	4.29636
2346	1315	4.17732
2132	1231	3.47092
2207	1314	4.12324
3184	1569	1.63317
1996	1118	3.20641
1876	1126	2.29211
2710	1423	4.50185
2540	1316	3.4252
1988	1045	1.45875
2217	917	1.62382
2203	1274	6.1734
2416	1197	3.76656
2657	1189	4.21528
2434	1271	3.94412
2059	1028	1.65129
2304	1148	4.16667
2460	1396	1.34146
1985	1118	2.56927
2026	941	1.33268
2275	1420	3.20879
2086	1308	2.58869
2470	1244	3.11741
1838	1161	3.64527
2518	1293	2.62113
2215	1221	2.57336
2283	1184	2.67192
1897	1234	3.37375
2616	1284	2.75229
2034	1251	2.11406
2046	1170	4.59433
2037	1058	5.49828
1778	1086	2.81215
2441	1302	6.14502
2123	1153	3.34432
1904	1171	1.15546
1688	930	7.28673
2705	1360	2.51386
3380	1316	1.50888
1982	1070	3.78406
2029	1156	5.22425
2059	1092	4.51676
2187	1266	4.75537
2143	1213	1.11993
1689	1021	4.02605
1815	1049	4.02204
1545	924	5.24272
1890	1103	3.7037
1912	1084	3.39958
2230	1111	3.40807
2747	1287	1.41973
2120	1048	4.95283
1750	1013	2.57143
1669	975	3.65488
1702	1047	3.93655
1836	1108	4.08497
1962	1076	2.34455
2013	878	1.68902
1563	1054	3.135
1847	993	2.86952
1969	958	1.62519
1841	1060	2.55296
1754	1000	5.98632
1748	1036	3.14645
1618	944	3.02843
2500	1156	2.04
1623	882	4.00493
2009	1142	3.43454
1884	1037	1.69851
1577	917	3.67787
1801	794	3.33148
1539	945	5.65302
1827	966	2.46305
1424	913	4.56461
1644	1008	2.49392
1481	951	3.44362
1948	1161	3.8501
1820	891	1.81319
1548	950	3.35917
1632	945	2.94118
1660	957	2.83133
1781	1115	4.26727
1646	1015	3.70595
1684	832	1.66271
1621	957	1.48057
1987	1071	1.05687
1769	926	2.65687
1397	949	2.29062
2004	1163	3.24351
1457	853	1.09815
1670	980	2.27545
1461	898	5.54415
1591	971	4.4626
1509	827	4.04241
1766	1018	2.77463
1913	940	9.77522
1917	1073	3.12989
1348	828	4.00593
1663	994	2.58569
1773	1055	2.48167
1276	895	3.29154
1420	766	2.74648
1558	902	1.73299
1275	774	1.17647
1483	958	4.18071
1922	974	1.97711
1940	1020	3.04124
1335	828	5.09363
1650	1033	2.06061
1415	854	4.09894
1630	1035	3.31288
1613	961	2.35586
1554	933	4.1184
2563	1203	2.02887
1531	918	4.18027
1394	706	2.08034
1611	994	3.97269
1405	780	4.41281
1694	911	1.71192
1484	811	2.62803
1830	919	2.02186
1304	700	1.38037
1601	865	1.4366
1369	708	2.48356
1319	944	1.44049
1036	681	2.79923
1434	918	1.74338
2009	1002	1.4435
1303	826	2.30238
1582	898	1.64349
1299	752	1.84758
1461	862	2.05339
2084	932	1.15163
1277	817	1.64448
985	673	2.33503
2009	888	1.69238
2766	1082	1.01229
1432	782	3.07263
1307	741	2.37184
1971	902	1.82648
1335	828	1.79775
1652	917	1.27119
1198	687	3.25543
1070	859	1.30841
1112	737	1.16906
1351	769	1.40637
1159	724	1.72563
1427	770	1.33146
1002	687	3.19361
1580	796	1.83544
912	631	2.85088
1721	820	1.91749
951	628	1.9979
1410	809	5.53191
1351	782	4.95929
887	570	2.70575
1665	835	1.14114
1145	725	6.9869
1340	795	2.16418
1285	705	1.63424
1138	713	2.81195
1231	753	3.08692
1783	819	2.46775
821	587	4.01949
1690	860	1.18343
1391	772	1.22214
770	522	1.16883
2282	781	2.2787
1722	812	1.74216
937	571	1.92102
985	653	1.01523
1070	712	1.21495
1301	735	2.30592
2293	803	1.83166
1085	654	2.94931
1380	711	1.01449
1745	788	1.08883
1159	655	2.50216
1939	739	3.61011
1485	674	5.92593
865	626	1.7341
826	544	2.42131
1314	681	1.14155
1052	582	1.14068
877	527	2.62258
744	502	1.6129
1015	601	2.95567
829	568	3.25694
973	534	1.84995
819	515	4.1514
1073	602	1.95713
1711	736	1.11046
995	573	2.81407
1067	608	2.53046
878	561	2.3918
1141	623	1.92813
1265	715	1.73913
877	591	4.78905
1479	684	2.0284
1019	617	2.15898
1884	718	1.38004
1662	705	1.1432
1030	635	2.81553
1715	783	1.98251
1099	638	1.54686
1577	669	2.2194
1906	752	1.36411
1613	707	1.42591
994	569	1.71026
1096	652	2.18978
839	550	3.33731
1299	664	1.38568
1862	734	2.57787
1196	601	2.00669
997	557	2.40722
1000	575	1.8
1101	575	1.18074
872	525	2.29358
1009	536	1.68484
1685	686	1.60237
1076	593	1.57993
1102	540	1.17967
1456	627	1.0989
1300	583	2.46154
1639	645	1.15924
1258	552	1.43084
1689	620	1.12493
981	550	2.44648
1619	638	1.05003
901	533	1.7758
1375	602	1.6
1169	611	1.02652
1286	612	1.78849
1145	590	1.39738
1195	566	4.85356
1341	611	1.34228
1349	604	1.18606
1181	555	1.27011
1179	568	1.52672
1632	661	1.16422
9758	3591	4.99078
8962	2783	5.06583
6689	2589	5.56137
7089	2910	1.87615
7069	2534	2.85755
6686	2720	3.57463
6739	2387	3.96201
7723	3066	4.53192
6750	2270	3.3037
5294	2181	3.55119
6726	2401	1.87333
5015	2257	3.23031
5265	2333	1.80437
6191	2547	2.72977
6003	2426	3.29835
5916	2527	3.5835
5831	2345	3.61859
6516	2722	2.76243
6600	2664	2.01515
8159	2450	1.61785
6930	2234	1.91919
5308	2399	3.44763
8289	2860	1.9544
6823	2283	1.02594
4959	1526	2.44001
5419	2373	4.81639
8938	2573	2.39427
4524	1807	3.71353
4779	2082	3.41076
5108	1989	2.66249
7498	2595	1.45372
6061	1864	1.5509
5075	1689	2.38424
6822	2130	1.39255
6029	2109	1.69182
4804	2048	3.74688
4595	1963	4.15669
4480	2036	2.38839
4396	2064	3.73066
4610	1873	2.45119
4860	2290	2.73663
5630	2067	2.41563
4787	2215	5.91184
5009	2173	2.25594
4539	2062	2.02688
8234	2312	1.28735
4435	1883	2.32244
5303	2128	3.97888
4421	2115	2.62384
4677	2301	3.80586
4052	1963	2.44324
3999	1931	4.30108
4786	2012	5.80861
7148	2434	1.73475
4911	2133	1.3032
5682	2544	3.32629
4227	2001	4.06908
4033	1673	3.91768
4458	2352	3.54419
4926	1929	3.06537
4551	1706	2.48297
5680	2213	1.93662
5008	1993	4.35304
4020	1806	4.10448
4228	1981	3.76064
4203	2001	3.44992
4431	2017	2.75333
6020	2065	1.86047
4263	1841	3.49519
3967	1464	2.92412
5439	1969	1.76503
3744	2030	3.20513
3962	1835	3.23069
3758	1703	4.68334
4141	1653	1.9802
4121	1857	2.83912
4365	2015	3.06987
4206	1666	4.92154
4500	1987	2.44444
4293	1988	6.05637
4184	1724	2.72467
3324	1411	2.55716
3959	1722	4.82445
4316	1867	1.64504
3557	1655	3.12061
4375	2070	3.77143
4644	1786	5.08183
3399	1596	3.00088
4620	1926	2.85714
3660	1883	3.30601
3694	1635	1.32648
3270	1430	3.0581
3485	1663	5.25108
4076	2038	4.31796
4889	2049	1.98405
3727	1677	3.38074
3663	1728	3.9585
3462	1335	3.11958
4993	1811	1.86261
4354	1700	3.55994
3567	1822	4.34539
4802	1920	3.70679
5509	2025	1.41586
4161	1665	2.33117
3790	1700	3.48285
4651	1724	2.8596
3450	1554	2.52174
4075	1705	5.12883
3747	1472	3.57619
3145	1239	3.27504
3686	1608	2.76723
4480	2030	1.22768
3956	1736	3.53893
4400	1694	3.47727
3716	1831	2.93326
3412	1718	3.72216
3835	1600	2.45111
3243	1503	2.99106
3454	1798	5.21135
3685	1399	3.4464
3476	1629	4.74684
3551	1652	3.46381
3435	1357	2.99854
4941	2213	1.90245
4153	2017	3.94895
4649	1663	1.26909
3310	1632	4.32024
3478	1553	2.6452
3698	1791	4.08329
4064	1983	3.93701
3316	1763	3.64897
5837	1922	1.11359
3463	1402	3.72509
3668	1650	3.84406
3863	1437	2.66632
6102	1693	1.75352
3707	1710	3.31805
3924	1705	4.17941
3758	1623	3.35285
3617	1676	2.18413
4430	1898	3.90519
3340	1677	3.17365
3942	2014	2.56215
3946	1675	3.49721
3802	1787	5.07628
3558	1594	3.59753
3487	1230	1.14712
4039	1379	3.83758
3551	1492	3.23852
3226	1594	1.92188
4931	1825	2.73778
3036	1407	3.85375
3246	1474	1.41713
3847	1588	2.85937
3357	1358	2.77033
3293	1189	2.6116
3519	1411	1.36402
3270	1534	3.24159
2893	1571	2.4542
3719	1582	2.04356
3019	1535	1.78867
3349	1484	4.50881
3290	1720	4.10334
3549	1640	1.69062
3504	1583	4.28082
4296	1980	3.3054
3347	1359	2.33045
3373	1665	3.88378
3829	1551	2.50718
4151	1826	2.77042
4963	1880	1.49103
3384	1699	4.04846
3246	1439	2.55699
3739	1663	3.93153
3388	1580	4.04368
2991	1317	2.60782
3253	1478	3.84261
4330	1724	3.74134
3295	1260	2.27618
3065	1557	1.40294
3133	1513	2.2662
5718	1629	1.15425
3614	1708	3.12673
3529	1657	2.862
4101	1925	3.04804
4610	1575	1.12798
3813	1836	3.09468
3756	1747	4.17998
3162	1280	1.99241
3460	1738	2.63006
2985	1430	1.94305
4106	1737	3.58013
3537	1619	1.32881
3179	1643	3.52312
3658	1524	2.02296
3506	1810	2.08214
3327	1465	1.65314
3058	1537	4.31655
5772	1727	1.28205
3392	1462	3.41981
3511	1494	2.96212
3190	1552	2.25705
3694	1736	5.17055
3536	1675	3.47851
3833	1676	3.99165
3174	1275	3.90674
3413	1378	2.51978
3741	1530	1.30981
2836	1371	4.47814
3405	1602	4.17034
3140	1484	3.12102
3411	1426	1.84697
2754	1226	2.90487
3249	1501	4.61681
3167	1513	5.20998
3346	1691	2.15182
2901	1327	2.9645
3302	1472	3.42217
3210	1323	1.80685
3290	1566	3.7386
3978	1699	2.43841
3428	1558	3.32555
3036	1592	2.23979
3118	1628	4.45799
3957	1693	4.70053
2947	1613	3.39328
2798	1240	2.9664
2922	1508	4.38056
3076	1151	2.73082
3072	1426	5.27344
3332	1321	1.89076
3134	1318	2.04212
5211	1669	1.24736
3702	1356	3.10643
3322	1629	4.06382
3000	1344	3.3
3343	1627	2.36315
2731	1480	6.22483
3105	1723	1.67472
3315	1799	2.26244
3796	1722	2.79241
3530	1652	3.82436
3079	1456	2.82559
3390	1583	4.77876
3469	1588	1.1819
2839	1333	1.62029
2832	1414	5.29661
3135	1619	2.36045
2572	1238	1.08865
3821	1640	1.98901
3139	1605	3.2813
2783	1329	3.37765
3116	1387	1.86136
3174	1508	4.2218
3729	1751	3.43256
2924	1282	1.50479
3661	1518	1.93936
3461	1686	2.65819
2561	1201	2.8895
2695	1349	3.74768
2847	1473	4.39059
2768	1437	4.04624
2392	1252	6.47993
3146	1541	2.73363
2940	1335	1.4966
3295	1648	1.03187
3666	1491	1.77305
2741	1245	2.1525
2766	1321	2.06074
3044	994	2.66097
3890	1749	2.75064
3072	1477	2.3763
3688	1572	2.52169
2974	1288	2.7236
2973	1358	1.41271
3085	1286	4.66775
3574	1570	3.02182
3559	1560	2.86597
2744	1404	5.3207
3374	1229	2.01541
2518	1357	4.16998
3802	1398	1.60442
3164	1487	2.74968
2667	1459	4.16198
2832	1235	3.38983
3396	1407	2.09069
3099	1601	5.16296
3202	1749	3.24797
2527	1172	5.57974
2975	1045	2.08403
2744	1375	2.40525
3532	1527	3.79388
2598	1166	2.65589
2872	1417	3.72563
3252	1505	3.99754
3361	1301	1.84469
2621	1260	4.15872
3208	1417	1.80798
2888	1382	1.35042
2633	1415	4.36764
2665	1102	1.95122
2854	1590	3.25858
2702	1662	2.77572
2851	1151	3.15679
3155	1533	2.9794
2772	1355	1.26263
3089	1436	2.68695
3613	1541	1.4946
2629	1427	4.4884
2320	1084	4.39655
2846	1344	3.09206
4275	1437	1.12281
3169	1516	2.39823
3018	1524	2.75017
2904	1530	4.7865
3796	1585	2.18651
2716	1185	2.31959
3819	1535	2.01623
3560	1444	3.31461
2932	1379	4.09277
2695	1402	2.26345
2695	1297	4.86085
3557	1529	1.63059
2563	1376	1.87281
2641	1404	3.74858
2934	1605	3.2379
2932	1244	2.69441
2726	1356	4.0719
3243	1282	1.51095
2640	1219	2.08333
2692	1405	2.30312
2784	1283	1.93966
2949	1454	3.7979
2176	1186	2.34375
2490	1226	3.29317
2922	1342	2.49829
2528	1289	2.33386
2395	1289	4.30063
3066	1370	3.58774
2843	1457	4.11537
4653	1450	1.13905
3043	1476	1.84029
3192	1426	2.34962
2695	1076	5.56586
2653	1374	2.67622
2514	1297	3.18218
2983	1488	3.98927
2687	1210	2.94008
3327	1692	3.93748
2635	1305	3.94687
2363	1211	2.07364
2756	1503	3.7373
2290	1107	3.40611
3246	1258	3.4504
2823	1549	2.40878
2482	1202	1.81305
2649	1431	1.77425
2555	1298	5.28376
2706	1539	2.84553
2751	1426	1.52672
3585	1455	2.98466
2871	1470	2.82132
2743	1325	2.29676
2975	1545	3.05882
2444	1338	6.62848
2723	1394	1.68931
2447	1089	1.51206
2560	1343	3.4375
2948	1368	2.20488
3130	1371	2.65176
3316	1356	3.40772
2608	1278	2.68405
3644	1590	2.22283
4001	1297	1.34966
3048	1375	2.75591
2469	1396	4.81977
2289	1049	2.62123
2358	1312	3.51993
3146	1583	4.64081
2287	1154	5.02842
2378	1338	4.96215
2305	978	2.55965
3442	1354	2.41139
2559	1492	4.25948
2389	1083	3.39054
3124	1380	2.84891
2647	1268	2.6445
2721	1168	1.4333
2629	1170	2.39635
4233	1569	2.19702
2840	1324	1.23239
2642	1288	3.63361
2474	1411	5.69927
2834	1351	3.70501
2902	1304	6.82288
2565	994	3.7037
2458	1293	4.4345
2186	1232	3.33943
2737	1099	2.77676
2414	1052	2.07125
2139	1196	3.17906
2744	1484	3.207
2285	1034	1.57549
2298	1054	2.4369
2882	1351	3.26162
2796	1091	3.46924
2568	1102	1.75234
2804	1428	2.85307
2431	1286	4.36035
2578	1182	2.94802
2806	1306	1.71062
2356	1116	4.49915
3279	1423	2.65325
2184	1023	2.38095
2919	1500	1.78143
2898	1372	3.1401
2402	1198	4.9542
2952	1078	2.67615
2368	1286	2.95608
2101	1083	3.04617
2368	1337	4.09628
2617	1341	4.35613
2451	1062	2.08078
2505	1272	1.07784
3572	1266	2.35162
2412	1305	2.15589
2907	1251	1.92638
2314	1144	2.59291
2549	1273	3.29541
2617	1336	2.06343
2357	1122	2.20619
3869	1400	1.21478
3030	1398	4.45545
2683	1320	2.79538
2726	1285	2.05429
2680	1323	3.0597
2452	1037	2.28385
2898	1198	1.00069
2246	1239	3.69546
2419	993	2.27367
2247	1050	3.02626
2886	1357	4.53915
2188	1329	2.01097
2115	1046	2.74232
2197	1042	2.4579
2201	1237	4.04362
2661	1366	4.43442
2161	1221	2.22119
2294	1095	2.39756
2350	1012	2.55319
2490	1209	3.05221
2554	1106	3.21065
2310	1342	1.42857
2602	1267	1.72944
2244	1314	4.72371
2917	1491	1.67981
3337	1384	1.82799
2211	1234	7.327
2271	1252	3.08234
2246	961	2.31523
1958	1048	5.15832
2434	1283	3.65653
2265	1093	2.82561
2079	1208	1.4911
2316	1034	4.70639
2547	1176	1.96309
2220	1276	2.7027
2531	1192	1.93599
2097	1000	1.57368
2802	1359	2.42684
1990	1054	3.21608
2215	1187	2.61851
2252	1054	2.48668
2174	1133	3.21987
3376	1357	2.81398
2216	1188	5.41516
2021	1152	4.65116
2821	1189	2.12691
2423	1268	3.13661
2229	1347	3.94796
2447	1147	3.31018
2498	1279	1.64131
2014	1116	5.61072
1997	1041	3.65548
2282	1230	4.73269
3960	1259	1.43939
2505	1091	2.79441
2832	1360	3.24859
3162	1238	1.67615
2301	1224	4.47631
3461	1308	1.24242
3130	1319	1.98083
2427	1133	2.84302
2451	1159	1.10159
2134	1086	3.60825
2673	1329	1.15975
2605	1190	4.76008
2204	1162	2.58621
2395	1218	3.00626
2180	1112	5.59633
3173	1354	2.89946
2247	1310	3.91633
2468	1044	1.49919
2193	1073	2.50798
2894	1162	1.6586
2620	1313	2.32824
2970	1226	2.12121
1995	1220	5.51378
1912	953	2.19665
2032	1316	2.85433
2245	1211	4.81069
2266	1069	3.61871
2115	1099	2.55319
2497	1229	2.84341
2746	1259	2.91333
2279	1204	3.59807
2347	1302	4.13294
2309	1043	1.9922
2574	1290	3.45765
1948	1054	4.8768
1910	1051	1.72775
3532	1287	1.21744
2099	1015	1.47689
1938	1125	3.86997
1958	1087	5.82227
2071	1201	3.28344
2087	971	4.21658
2270	1182	3.78855
2408	1180	2.24252
2601	1326	1.84544
3300	1285	3.09091
2094	912	2.29226
2386	1175	3.43671
2131	1182	4.73956
2571	1263	3.81175
2051	1164	3.2667
2375	1254	3.07368
2126	1189	3.7159
2427	1032	4.73836
1999	975	2.85143
1871	1002	3.0465
2137	964	1.02948
2209	1197	2.94251
2234	1066	2.41719
2268	1023	2.51323
2354	1176	1.9966
2197	877	2.00273
2117	912	2.17289
2382	1100	1.30143
1956	883	3.06748
2101	961	4.09329
2439	1193	2.91103
1832	1029	3.54803
2689	1205	2.56601
1862	944	2.68528
2447	1202	3.55537
2341	1144	2.60572
2227	1149	3.99641
2424	1160	2.88779
3004	1277	2.26365
1711	954	2.63004
2714	1168	1.95284
2126	1080	2.35183
2361	1169	3.51546
1778	977	5.6243
2185	735	1.5103
2451	1031	2.36638
2384	1084	4.23658
2278	1088	2.98507
1998	1097	3.55355
2135	1134	2.38876
2200	1181	3.90909
2426	1095	3.13273
2034	828	2.35988
2485	1236	3.13883
2167	982	2.26119
1982	942	3.27952
2854	1222	1.64681
1940	1050	5.30928
1849	1117	2.10925
1932	1098	3.62319
2341	1199	3.75908
2017	1058	3.66882
1812	1025	4.85651
2456	1329	3.82736
2484	1136	1.52979
2259	1071	3.23152
2077	931	3.08137
2223	1203	1.03464
1960	1118	2.29592
2043	966	3.76897
1809	1060	4.14594
1976	1026	3.28947
1928	953	3.26763
2262	1031	3.31565
1905	1096	1.83727
1749	806	2.00114
1893	1114	4.33175
2890	1206	2.97578
2314	1050	3.93258
1988	942	3.31992
2017	1059	3.81755
1702	739	3.23149
1993	1096	2.60913
1985	901	3.07305
2390	1192	2.00837
1685	831	6.2908
2152	1033	3.20632
2039	1140	4.31584
2184	989	3.89194
2001	1191	3.04848
2795	1169	1.6458
2354	1299	3.18607
1982	1047	5.80222
2312	960	1.51384
1840	1006	3.31522
2132	1108	3.79925
1669	878	3.65488
2505	1262	3.07385
1723	958	5.80383
2151	904	2.69642
1808	946	4.59071
2189	1152	3.28917
2080	934	2.11538
1952	930	1.43443
1759	1045	3.18363
2076	1160	4.19075
1907	977	1.04877
1667	948	3.95921
2126	1076	2.06961
1945	1149	1.79949
2406	1073	1.24688
1997	956	3.20481
2133	1014	2.34412
2035	1017	5.79853
1629	911	2.70104
1962	991	1.37615
2036	1076	4.3222
1901	1050	5.3656
1785	856	4.20168
1974	942	2.43161
1782	990	4.54545
2137	1063	3.88395
2015	995	1.04218
1688	773	1.77725
2125	989	6.21176
1894	967	2.69271
1979	879	1.71804
1989	887	2.71493
1860	1051	1.29032
2428	1169	1.11203
1993	1036	2.55896
1835	851	3.9782
2116	1129	3.54442
1585	928	2.64984
2703	1221	2.14576
1852	1004	2.59179
1821	928	6.75453
1885	1124	5.19894
1956	1029	3.27198
1850	978	3.72973
1854	1063	3.77562
1861	1086	2.20312
1688	910	4.02844
2592	1079	2.43056
2465	1065	4.98986
1623	957	2.34134
1994	989	4.86459
2066	986	2.27493
1724	919	2.43619
1772	1053	3.61174
2171	932	3.17826
1748	962	5.03432
1531	908	4.70281
1999	1103	1.70085
1833	859	3.70977
1676	1025	1.55131
2028	1060	3.00789
2300	1153	2.04348
2066	1081	2.85576
2041	1112	3.57668
1448	769	6.56077
1968	899	4.21748
1815	1120	4.40771
1747	1051	1.03034
2026	1109	2.61599
1629	943	3.31492
2117	1025	4.95985
1884	1003	5.52017
2383	1086	1.38481
1964	998	3.46232
2052	1055	2.38791
1851	978	3.18747
2157	1062	5.28512
1600	892	2.9375
1841	971	2.00978
2346	1085	1.02302
1900	1005	5.10526
1728	1042	2.1412
2006	999	2.09372
1967	990	2.08439
2052	950	3.80117
1813	1065	1.37893
2691	1109	2.52694
2342	1098	2.9035
2133	1137	3.32865
1991	1078	4.41989
1896	1057	3.05907
2198	1060	2.00182
2065	1104	2.51816
2421	1169	2.14787
1668	745	2.03837
1467	760	2.59032
1793	973	4.51757
1614	962	4.83271
2138	1029	3.27409
1966	1006	4.93388
1731	1005	4.85269
1778	1134	3.03712
1920	1075	1.04167
1840	892	2.5
1789	920	3.8569
1481	902	2.09318
1960	964	3.67347
1814	1026	5.01654
2516	974	3.33863
1886	947	3.3404
1770	803	3.10734
1930	998	3.67876
1764	970	2.77778
1862	838	1.28894
1827	1041	2.79146
1566	841	4.02299
1760	894	3.97727
2089	1156	2.5371
1978	918	3.18504
1797	899	1.39121
2002	1042	3.54645
1859	1012	3.38892
1689	862	3.07874
2093	1103	3.24892
2183	1048	3.48145
1929	880	2.12545
2091	1040	5.45194
1674	884	4.00239
1779	909	4.27206
1877	961	3.35642
2071	1096	3.28344
1927	863	5.24131
2143	1115	3.31311
1580	897	5
1751	890	4.11194
1925	1009	3.42857
1560	835	1.79487
1931	653	2.38219
1993	1063	3.01054
2254	1056	2.35138
1912	949	3.66109
2272	905	1.58451
1813	950	3.14396
1665	932	1.38138
1530	905	1.76471
2450	1059	1.63265
1525	780	4.52459
1681	922	2.08209
1816	909	2.80837
1852	1040	3.61771
1834	880	1.79935
1687	972	2.37107
1837	972	5.38922
2400	1113	2.66667
1626	896	5.84256
1759	1010	3.63843
1593	928	2.25989
1675	966	2.86567
1607	984	5.78718
1597	898	3.06825
1673	824	2.80932
1681	1016	3.92623
2024	966	5.97826
1725	878	5.85507
1880	950	3.88298
1677	926	3.69708
2058	1075	4.71331
1560	925	4.55128
1790	1001	4.30168
1567	763	2.99936
1562	960	3.77721
1944	818	2.4177
1487	867	4.43847
1426	764	3.01543
1937	977	2.83944
1798	1044	2.66963
1682	706	2.9132
1448	753	3.31492
2179	1088	2.52409
1851	1039	3.94381
1592	872	3.39196
1336	814	3.81737
1540	788	5.97403
1807	898	4.59325
1688	904	3.08057
1717	936	4.65929
1481	746	5.46928
2174	1015	1.10396
1645	919	3.16109
1563	795	3.71081
1796	779	2.44989
2129	1056	4.03946
1426	826	3.64656
1543	812	3.11082
1819	1062	1.42936
1380	654	1.88406
1527	826	3.60183
1616	850	7.73515
1601	961	1.24922
1750	976	2.51429
1517	781	2.43902
2001	914	1.69915
1810	816	2.54144
1648	848	2.48786
1786	916	5.87906
1394	746	4.01722
1536	885	4.29688
1343	850	2.53165
1675	860	4.71642
1457	839	4.04942
2229	930	2.15343
1376	593	2.97965
2002	987	3.64635
1739	979	3.45026
1493	897	2.41125
1689	973	5.21018
1659	926	3.67691
1721	902	2.67286
1657	992	4.4659
1494	822	4.88621
1549	799	5.93932
1687	921	4.14938
1704	889	3.81455
1602	936	2.12235
1362	782	4.18502
1724	852	4.29234
2126	938	3.48071
1522	735	1.18265
1515	728	1.45215
1669	1009	3.11564
1519	910	5.72745
1818	970	2.80528
1667	945	3.65927
2069	1027	2.51329
1674	1035	3.7037
1597	848	3.31872
1344	810	2.08333
1580	947	3.22785
1652	988	1.08959
1347	785	3.86043
1793	859	2.39822
1568	795	2.35969
1807	910	3.87382
1490	810	2.61745
1722	808	1.39373
1491	888	3.08518
1617	929	4.94743
1662	925	2.76775
1332	824	4.87988
1627	880	2.27412
1910	1000	3.4555
1815	975	2.92011
1703	861	3.05344
1553	852	2.12492
1512	895	1.91799
1444	743	7.75623
1420	813	4.08451
1892	932	2.21987
1899	1034	5.00263
1561	882	2.37028
1829	1019	3.44451
1141	635	2.97984
1362	819	7.04846
1890	1074	1.21693
1778	958	2.98088
1884	983	2.9724
2153	942	2.9726
2146	963	1.11836
1342	772	3.20417
1657	886	5.7936
1461	788	1.98494
1667	802	3.89922
1162	644	2.32358
1290	808	6.27907
1579	650	2.59658
1453	766	2.20234
1400	842	1.92857
1256	569	3.50318
1775	863	2.59155
1432	821	4.88827
1723	863	3.54034
1874	1000	2.56137
1385	779	3.1769
1513	931	2.57766
1829	827	6.23291
1382	857	6.07815
1321	742	2.42241
1432	877	5.72626
1731	990	2.83073
2261	942	2.38832
1384	795	1.30058
1570	940	2.54777
1562	781	4.22535
1570	741	2.03822
1387	659	1.22567
1434	794	5.16039
1449	801	2.00138
1589	892	3.71303
1275	815	3.52941
1728	885	2.66204
1244	783	4.58199
1393	803	4.16368
1343	809	4.39315
1504	853	4.05585
1490	789	5.30201
1381	748	2.5344
1682	808	3.86445
1419	760	8.17477
1399	832	3.1451
1322	811	3.10136
1126	679	5.68384
1702	983	1.70388
1950	906	3.74359
1718	896	3.31781
1238	739	4.6042
2066	943	2.32333
1302	792	3.68664
1686	972	2.78766
2064	921	2.61628
1614	893	3.03594
1387	821	3.17231
1943	1002	3.39681
1557	888	3.91779
1538	706	2.21066
1549	870	2.00129
1508	858	3.71353
1442	851	1.04022
1446	841	4.426
1582	821	4.17193
1433	761	9.76971
1417	683	3.17572
1570	850	5.73248
1370	766	4.9635
1356	540	2.35988
1238	769	4.36187
1384	867	3.3237
1470	912	3.19728
1279	772	3.20563
1655	857	2.05438
1331	695	5.86026
1329	685	3.23552
1217	691	1.31471
1746	934	2.46277
1613	824	5.0217
1464	874	3.21038
1732	891	4.50346
1228	715	1.38436
1972	1001	1.21704
1807	831	3.20974
1186	636	3.79427
1260	775	5.63492
1966	832	1.16989
1416	839	4.73164
1928	946	2.59336
1717	895	3.08678
1547	704	2.32708
1335	622	1.64794
1741	941	3.04423
1801	898	1.61022
1264	674	3.16456
1422	835	3.16456
1249	691	2.40192
1300	811	3
1442	752	3.67545
1675	853	2.32836
1377	630	2.54176
2030	913	1.28079
1314	745	1.06545
1148	613	1.0453
1187	580	2.52738
1584	858	3.09343
1314	763	4.71842
1297	716	4.62606
2479	831	1.00847
2278	947	1.05356
1609	763	4.66128
1226	576	5.70962
1447	819	3.2481
1407	690	2.55864
1340	749	2.53731
1204	775	7.0598
1221	732	5.07781
1370	841	5.47445
1499	806	3.93596
1572	776	3.62595
1452	846	2.75482
1425	780	5.33333
1250	726	7.04
1371	683	5.83516
1306	746	3.98162
1524	794	2.55906
1381	811	4.27227
1474	868	3.52782
1054	593	6.35674
2058	859	1.26336
1564	843	2.8133
1478	766	2.16509
1678	761	2.80095
1574	787	3.11309
1262	729	2.13946
1218	652	3.94089
1350	731	1.18519
1433	793	3.34962
1875	837	1.6
1355	793	4.13284
1386	781	3.3189
1394	788	2.86944
1629	877	4.17434
1486	791	1.00942
1207	645	3.23115
1487	780	2.01748
1373	748	3.64166
1945	819	1.54242
1385	798	1.22744
1287	757	4.5843
1366	765	4.31918
1274	751	6.51491
1267	756	1.49961
1384	610	2.89017
1304	579	1.30368
1566	866	3.38442
1199	763	4.08674
1150	711	5.30435
2027	817	1.18402
1367	824	3.51134
1358	827	3.60825
1474	861	5.63094
1388	768	3.24207
1196	685	5.10033
1528	836	3.66492
1717	791	1.74723
1455	790	5.49828
1825	861	4.27397
1587	848	3.27662
1394	783	4.73458
1492	767	2.47989
2127	841	1.17536
1394	768	1.0043
1442	787	2.21914
1339	747	4.33159
1252	694	5.35144
1187	725	2.35889
1040	565	3.36538
1681	883	3.50982
1216	696	4.11184
1545	802	2.00647
1444	767	3.4626
1519	781	3.02831
1237	707	2.74859
1391	753	2.58807
1635	787	4.09786
1484	754	2.62803
1350	760	3.77778
1422	794	3.79747
942	580	6.05096
1770	849	2.54237
1312	697	4.64939
1333	709	2.77569
1617	864	1.85529
1251	764	4.23661
1350	714	1.40741
1317	683	3.49279
1226	673	1.30506
1308	680	1.37615
1412	869	4.74504
1176	677	2.04082
1453	782	2.75292
1325	790	3.01887
959	640	4.48384
1283	696	2.5721
1364	779	3.15249
1282	734	3.74415
1215	710	2.30453
1096	670	4.10584
1357	784	6.85335
1227	576	3.66748
1188	634	4.88215
1454	840	2.81981
1164	581	2.4055
[truncated: 578 more rows]
