# Supplementary material for: Single-cell RNA-seq analysis reveals penaeid shrimp hemocyte subpopulations and cell differentiation process
Source: eLife. 2021 Jun 16;10:e66954. doi: 10.7554/eLife.66954 (PMC8266392; doi:10.7554/eLife.66954)
Supplement: Figure 5—source data 1. [file elife-66954-fig5-data1.xlsx]

## Sheet: Figure 5A
Source data file for Figure 5A
Single-cell RNA-seq analysis reveals penaeid shrimp hemocyte subpopulations and cell differentiation process
Keiichiro Koiwai a, b, *, Takashi Koyama c, d, Soichiro Tsuda e, Atsushi Toyoda f, Kiyoshi Kikuchi c, Hiroaki Suzuki g, Ryuji Kawano a
a Department of Biotechnology and Life Science, Tokyo University of Agriculture and Technology, Koganei, Tokyo 184-8588, Japan
b Laboratory of Genome Science, Tokyo University of Marine Science and Technology, Minato, Tokyo, 108-8477, Japan
c Fisheries Laboratory, Graduate School of Agricultural and Life Sciences, The University of Tokyo, Hamamatsu, Shizuoka 431-0214, Japan
d Graduate School of Fisheries and Environmental Sciences, Nagasaki University, Bunkyo-machi, Nagasaki, Nagasaki 852-8521, Japan
e bitBiome Inc., Waseda University Incubation Center, Nishiwaseda, Shinjuku, Tokyo 169-0051, Japan
f Advanced Genomics Center, National Institute of Genetics, Mishima, Shizuoka 411-8540, Japan
g Department of Precision Mechanics, Faculty of Science and Engineering, Chuo University, Bunkyo, Tokyo 112-8551, Japan
*To whom correspondence should be addressed. Email: koiwai@kaiyodai.ac.jp
	Hem1			Hem2			Hem3			Hem4			Hem5			Hem6
Cell state	G1	G2M	S	G1	G2M	S	G1	G2M	S	G1	G2M	S	G1	G2M	S	G1	G2M	S
Counts	78	87	3	599	99	152	347	25	161	272	10	186	84	6	44	313	9	91
Percentage per cluster	0.464286	0.517857	0.0178571	0.704706	0.116471	0.178824	0.651032	0.0469043	0.302064	0.581197	0.0213675	0.397436	0.626866	0.0447761	0.328358	0.757869	0.0217918	0.220339
