# Supplementary material for: Single-cell RNA-seq analysis reveals penaeid shrimp hemocyte subpopulations and cell differentiation process
Source: eLife. 2021 Jun 16;10:e66954. doi: 10.7554/eLife.66954 (PMC8266392; doi:10.7554/eLife.66954)
Supplement: Figure 9—source data 1. [file elife-66954-fig9-data1.xlsx]

## Sheet: Figure 6F
Source data file for Figure 9F
Single-cell RNA-seq analysis reveals penaeid shrimp hemocyte subpopulations and cell differentiation process
Keiichiro Koiwai a, b, *, Takashi Koyama c, d, Soichiro Tsuda e, Atsushi Toyoda f, Kiyoshi Kikuchi c, Hiroaki Suzuki g, Ryuji Kawano a
a Department of Biotechnology and Life Science, Tokyo University of Agriculture and Technology, Koganei, Tokyo 184-8588, Japan
b Laboratory of Genome Science, Tokyo University of Marine Science and Technology, Minato, Tokyo, 108-8477, Japan
c Fisheries Laboratory, Graduate School of Agricultural and Life Sciences, The University of Tokyo, Hamamatsu, Shizuoka 431-0214, Japan
d Graduate School of Fisheries and Environmental Sciences, Nagasaki University, Bunkyo-machi, Nagasaki, Nagasaki 852-8521, Japan
e bitBiome Inc., Waseda University Incubation Center, Nishiwaseda, Shinjuku, Tokyo 169-0051, Japan
f Advanced Genomics Center, National Institute of Genetics, Mishima, Shizuoka 411-8540, Japan
g Department of Precision Mechanics, Faculty of Science and Engineering, Chuo University, Bunkyo, Tokyo 112-8551, Japan
*To whom correspondence should be addressed. Email: koiwai@kaiyodai.ac.jp
Region from FACS sorting	Biological replicates	Target genes	CT values
Total	Shrimp1	EF-1alpha	19.67
Total	Shrimp2	EF-1alpha	19.37
Total	Shrimp3	EF-1alpha	19.58
Total	Shrimp4	EF-1alpha	19
R1	Shrimp1	EF-1alpha	31.29
R1	Shrimp2	EF-1alpha	33.88
R1	Shrimp3	EF-1alpha	26.09
R1	Shrimp4	EF-1alpha	25.65
R2	Shrimp1	EF-1alpha	29.26
R2	Shrimp2	EF-1alpha	29.31
R2	Shrimp3	EF-1alpha	26.4
R2	Shrimp4	EF-1alpha	25.23
Total	Shrimp1	HemTGase	19.16
Total	Shrimp2	HemTGase	19.72
Total	Shrimp3	HemTGase	18.75
Total	Shrimp4	HemTGase	19.26
R1	Shrimp1	HemTGase	32.03
R1	Shrimp2	HemTGase	34.94
R1	Shrimp3	HemTGase	24.38
R1	Shrimp4	HemTGase	25.52
R2	Shrimp1	HemTGase	30.86
R2	Shrimp2	HemTGase	29.74
R2	Shrimp3	HemTGase	26.4
R2	Shrimp4	HemTGase	26.41
Total	Shrimp1	Penaeidin	15.97
Total	Shrimp2	Penaeidin	15.57
Total	Shrimp3	Penaeidin	15.94
Total	Shrimp4	Penaeidin	16.24
R1	Shrimp1	Penaeidin	27.08
R1	Shrimp2	Penaeidin	31.14
R1	Shrimp3	Penaeidin	23.05
R1	Shrimp4	Penaeidin	22.96
R2	Shrimp1	Penaeidin	24.59
R2	Shrimp2	Penaeidin	25.06
R2	Shrimp3	Penaeidin	22.3
R2	Shrimp4	Penaeidin	21.55
Total	Shrimp1	Crustin	18.86
Total	Shrimp2	Crustin	18.8
Total	Shrimp3	Crustin	19.05
Total	Shrimp4	Crustin	18.63
R1	Shrimp1	Crustin	30.22
R1	Shrimp2	Crustin	33.44
R1	Shrimp3	Crustin	26.89
R1	Shrimp4	Crustin	25.76
R2	Shrimp1	Crustin	27.75
R2	Shrimp2	Crustin	28.46
R2	Shrimp3	Crustin	26.12
R2	Shrimp4	Crustin	24.72
Total	Shrimp1	Stylicin	20.57
Total	Shrimp2	Stylicin	20.98
Total	Shrimp3	Stylicin	20.36
Total	Shrimp4	Stylicin	21.34
R1	Shrimp1	Stylicin	33.6
R1	Shrimp2	Stylicin	39.95
R1	Shrimp3	Stylicin	27.94
R1	Shrimp4	Stylicin	29.82
R2	Shrimp1	Stylicin	30.24
R2	Shrimp2	Stylicin	31.05
R2	Shrimp3	Stylicin	27.26
R2	Shrimp4	Stylicin	26.55
Total	Shrimp1	proPO	20.3
Total	Shrimp2	proPO	18.8
Total	Shrimp3	proPO	20.72
Total	Shrimp4	proPO	19.52
R1	Shrimp1	proPO	31.83
R1	Shrimp2	proPO	34.34
R1	Shrimp3	proPO	27.11
R1	Shrimp4	proPO	25.93
R2	Shrimp1	proPO	28.62
R2	Shrimp2	proPO	27.96
R2	Shrimp3	proPO	27.38
R2	Shrimp4	proPO	24.35
Total	Shrimp1	SOD	24.55
Total	Shrimp2	SOD	25.05
Total	Shrimp3	SOD	24.34
Total	Shrimp4	SOD	25.09
R1	Shrimp1	SOD	35.6
R1	Shrimp2	SOD	40
R1	Shrimp3	SOD	32.21
R1	Shrimp4	SOD	33.11
R2	Shrimp1	SOD	33.53
R2	Shrimp2	SOD	34.72
R2	Shrimp3	SOD	31.39
R2	Shrimp4	SOD	30.83
Total	Shrimp1	C-lysozyme	20.75
Total	Shrimp2	C-lysozyme	21.4
Total	Shrimp3	C-lysozyme	23.96
Total	Shrimp4	C-lysozyme	20.87
R1	Shrimp1	C-lysozyme	32.71
R1	Shrimp2	C-lysozyme	32.93
R1	Shrimp3	C-lysozyme	29.48
R1	Shrimp4	C-lysozyme	28.34
R2	Shrimp1	C-lysozyme	30.65
R2	Shrimp2	C-lysozyme	30.98
R2	Shrimp3	C-lysozyme	30.39
R2	Shrimp4	C-lysozyme	27.96
Total	Shrimp1	VRP	25.87
Total	Shrimp2	VRP	27.94
Total	Shrimp3	VRP	22.45
Total	Shrimp4	VRP	29.01
R1	Shrimp1	VRP	35.73
R1	Shrimp2	VRP	40
R1	Shrimp3	VRP	29.28
R1	Shrimp4	VRP	35.56
R2	Shrimp1	VRP	35.93
R2	Shrimp2	VRP	36.82
R2	Shrimp3	VRP	29.69
R2	Shrimp4	VRP	35.05
