# Supplementary material for: Single-cell RNA-seq analysis reveals penaeid shrimp hemocyte subpopulations and cell differentiation process
Source: eLife. 2021 Jun 16;10:e66954. doi: 10.7554/eLife.66954 (PMC8266392; doi:10.7554/eLife.66954)
Supplement: Supplementary file 1. [file elife-66954-supp1.xlsx]

## Sheet: Supplementary file 1
Table representing Blastx researching of assembled genes against penaeid shrimp's proteins.
Single-cell RNA-seq analysis reveals penaeid shrimp hemocyte subpopulations and cell differentiation process
Keiichiro Koiwai a, b, *, Takashi Koyama c, d, Soichiro Tsuda e, Atsushi Toyoda f, Kiyoshi Kikuchi c, Hiroaki Suzuki g, Ryuji Kawano a
a Department of Biotechnology and Life Science, Tokyo University of Agriculture and Technology, Koganei, Tokyo 184-8588, Japan
b Laboratory of Genome Science, Tokyo University of Marine Science and Technology, Minato, Tokyo, 108-8477, Japan
c Fisheries Laboratory, Graduate School of Agricultural and Life Sciences, The University of Tokyo, Hamamatsu, Shizuoka 431-0214, Japan
d Graduate School of Fisheries and Environmental Sciences, Nagasaki University, Bunkyo-machi, Nagasaki, Nagasaki 852-8521, Japan
e bitBiome Inc., Waseda University Incubation Center, Nishiwaseda, Shinjuku, Tokyo 169-0051, Japan
f Advanced Genomics Center, National Institute of Genetics, Mishima, Shizuoka 411-8540, Japan
g Department of Precision Mechanics, Faculty of Science and Engineering, Chuo University, Bunkyo, Tokyo 112-8551, Japan
*To whom correspondence should be addressed. Email: koiwai@kaiyodai.ac.jp
Query	accession No.	protein name [scientific name]	Identity	e-value	Bit Score	GO annotation	KOG annotation	Prediced function
Mj-1	XP_027225002.1	dystonin-like [Penaeus vannamei]	94.19	0	10240	#N/A	Z
Mj-1002	#N/A	#N/A	#N/A	#N/A	#N/A	#N/A	#N/A
Mj-10024	#N/A	#N/A	#N/A	#N/A	#N/A	#N/A	#N/A
Mj-10040	QDX01885.1	ML protein [Penaeus japonicus]	100	5e-98	297	#N/A	#N/A	immune-related
Mj-10041	#N/A	#N/A	#N/A	#N/A	#N/A	#N/A	#N/A
Mj-10051	#N/A	#N/A	#N/A	#N/A	#N/A	#N/A	#N/A
Mj-10053	#N/A	#N/A	#N/A	#N/A	#N/A	#N/A	#N/A
Mj-10059	ROT73014.1	hypothetical protein C7M84_008575 [Penaeus vannamei]	99.34	1e-76	230	GO:0000028,GO:0003674,GO:0003735,GO:0005198,GO:0005575,GO:0005622,GO:0005623,GO:0005737,GO:0005829,GO:0005840,GO:0006996,GO:0008150,GO:0009987,GO:0015935,GO:0016043,GO:0022607,GO:0022613,GO:0022618,GO:0022626,GO:0022627,GO:0032991,GO:0034622,GO:0042254,GO:0042255,GO:0042274,GO:0043226,GO:0043228,GO:0043229,GO:0043232,GO:0043933,GO:0044085,GO:0044391,GO:0044422,GO:0044424,GO:0044444,GO:0044445,GO:…	J
Mj-10071	XP_027218158.1	uncharacterized protein LOC113810727 [Penaeus vannamei]	97.16	0	860	GO:0003674,GO:0005488,GO:0005515,GO:0006457,GO:0008150,GO:0009987,GO:0051082	O
Mj-10077	XP_027228996.1	LOW QUALITY PROTEIN: mucin-17-like [Penaeus vannamei]	93.44	0	2502	#N/A	#N/A
Mj-10083	XP_027238511.1	AF4/FMR2 family member 4-like isoform X1 [Penaeus vannamei]	92.86	0	1973	GO:0000785,GO:0000910,GO:0000912,GO:0000915,GO:0001085,GO:0001654,GO:0001745,GO:0001751,GO:0001754,GO:0003002,GO:0003008,GO:0003674,GO:0003676,GO:0003677,GO:0003700,GO:0005488,GO:0005515,GO:0005575,GO:0005622,GO:0005623,GO:0005634,GO:0005654,GO:0005694,GO:0006355,GO:0006357,GO:0006996,GO:0007010,GO:0007049,GO:0007275,GO:0007350,GO:0007365,GO:0007366,GO:0007389,GO:0007399,GO:0007423,GO:0007444,GO:…	K
Mj-10086	XP_027231412.1	LOW QUALITY PROTEIN: WW domain-containing adapter protein with coiled-coil-like [Penaeus vannamei]	99.16	0	672	GO:0000323,GO:0003008,GO:0005575,GO:0005622,GO:0005623,GO:0005634,GO:0005737,GO:0005764,GO:0005773,GO:0006325,GO:0006464,GO:0006513,GO:0006807,GO:0006996,GO:0007610,GO:0007611,GO:0007612,GO:0008150,GO:0008152,GO:0009892,GO:0009894,GO:0009895,GO:0009966,GO:0009967,GO:0009987,GO:0010390,GO:0010506,GO:0010507,GO:0010646,GO:0010647,GO:0016043,GO:0016567,GO:0016569,GO:0016570,GO:0016574,GO:0019222,GO:…	A
Mj-10126	XP_027233969.1	uncharacterized protein LOC113825354 [Penaeus vannamei]	88.59	0	1060	GO:0005575,GO:0005622,GO:0005623,GO:0005737,GO:0005829,GO:0006605,GO:0006622,GO:0006623,GO:0006725,GO:0006726,GO:0006727,GO:0006810,GO:0006886,GO:0007034,GO:0007041,GO:0008055,GO:0008104,GO:0008150,GO:0008152,GO:0009058,GO:0009893,GO:0009987,GO:0010468,GO:0010604,GO:0010628,GO:0015031,GO:0015833,GO:0018130,GO:0019222,GO:0019438,GO:0019748,GO:0031082,GO:0031084,GO:0032991,GO:0033036,GO:0033060,GO:…	S
Mj-10154	#N/A	#N/A	#N/A	#N/A	#N/A	#N/A	#N/A
Mj-1016	XP_027219813.1	uncharacterized protein LOC113812174 [Penaeus vannamei]	90.23	9e-92	309	#N/A	S
Mj-1020	XP_027239364.1	LOW QUALITY PROTEIN: uncharacterized protein LOC113830349 [Penaeus vannamei]	89.13	0	1051	#N/A	K
Mj-10216	ROT67066.1	hypothetical protein C7M84_014874 [Penaeus vannamei]	91.9	0	608	#N/A	#N/A
Mj-10252	ROT65507.1	hypothetical protein C7M84_016538 [Penaeus vannamei]	99.77	0	922	GO:0000003,GO:0000932,GO:0002064,GO:0002065,GO:0002066,GO:0002682,GO:0002697,GO:0002831,GO:0003006,GO:0003008,GO:0003674,GO:0003676,GO:0003723,GO:0003724,GO:0003824,GO:0004004,GO:0004386,GO:0005488,GO:0005515,GO:0005575,GO:0005622,GO:0005623,GO:0005634,GO:0005730,GO:0005737,GO:0006139,GO:0006725,GO:0006807,GO:0006996,GO:0007275,GO:0007276,GO:0007277,GO:0007279,GO:0007281,GO:0007292,GO:0007349,GO:…	A
Mj-1026	XP_027236878.1	mucin-19-like isoform X2 [Penaeus vannamei]	76.6	0	1122	#N/A	#N/A
Mj-10291	XP_027212983.1	myosin-2 essential light chain-like [Penaeus vannamei]	99.32	4e-98	298	GO:0003674,GO:0005488,GO:0005515,GO:0005575,GO:0005622,GO:0005623,GO:0005856,GO:0006928,GO:0008092,GO:0008150,GO:0009987,GO:0015629,GO:0016459,GO:0016460,GO:0016461,GO:0017022,GO:0030029,GO:0030048,GO:0031475,GO:0031476,GO:0031477,GO:0032036,GO:0032991,GO:0043226,GO:0043228,GO:0043229,GO:0043232,GO:0044422,GO:0044424,GO:0044430,GO:0044446,GO:0044464	Z
Mj-10294	#N/A	#N/A	#N/A	#N/A	#N/A	#N/A	#N/A
Mj-10331	ROT82820.1	Transcription initiation factor IIB [Penaeus vannamei]	99.68	0	608	GO:0001173,GO:0001174,GO:0003674,GO:0005488,GO:0005515,GO:0005575,GO:0005622,GO:0005623,GO:0005634,GO:0006139,GO:0006351,GO:0006352,GO:0006355,GO:0006357,GO:0006366,GO:0006367,GO:0006725,GO:0006807,GO:0008134,GO:0008150,GO:0008152,GO:0009058,GO:0009059,GO:0009889,GO:0009987,GO:0010467,GO:0010468,GO:0010556,GO:0016070,GO:0018130,GO:0019219,GO:0019222,GO:0019438,GO:0031323,GO:0031326,GO:0032774,GO:…	K
Mj-10335	XP_027227584.1	putative polypeptide N-acetylgalactosaminyltransferase 9 isoform X2 [Penaeus vannamei]	97.29	0	1172	GO:0000003,GO:0003674,GO:0003824,GO:0004653,GO:0005575,GO:0005622,GO:0005623,GO:0005737,GO:0005794,GO:0005795,GO:0006464,GO:0006486,GO:0006493,GO:0006807,GO:0008150,GO:0008152,GO:0008194,GO:0008376,GO:0009058,GO:0009059,GO:0009100,GO:0009101,GO:0009987,GO:0012505,GO:0016020,GO:0016021,GO:0016740,GO:0016757,GO:0016758,GO:0019538,GO:0031224,GO:0031984,GO:0031985,GO:0032501,GO:0032504,GO:0034645,GO:…	O
Mj-10366	ROT79491.1	putative leucine-rich repeat and calponin-likey domain-containing protein 1 isoform X2 [Penaeus vannamei]	97.05	0	1422	GO:0005575,GO:0005622,GO:0005623,GO:0005737,GO:0005886,GO:0005938,GO:0007154,GO:0007165,GO:0008150,GO:0009987,GO:0016020,GO:0023052,GO:0032153,GO:0032154,GO:0032155,GO:0044424,GO:0044425,GO:0044444,GO:0044459,GO:0044464,GO:0050789,GO:0050794,GO:0050896,GO:0051716,GO:0065007,GO:0071944,GO:0098590,GO:0099568	Z
Mj-10368	XP_027220958.1	uncharacterized protein LOC113813198 [Penaeus vannamei]	80.13	3e-109	346	GO:0000298,GO:0003674,GO:0003824,GO:0004551,GO:0005575,GO:0005622,GO:0005623,GO:0005634,GO:0005737,GO:0006066,GO:0006139,GO:0006163,GO:0006195,GO:0006725,GO:0006753,GO:0006793,GO:0006796,GO:0006807,GO:0006950,GO:0008150,GO:0008152,GO:0008486,GO:0009056,GO:0009058,GO:0009117,GO:0009123,GO:0009125,GO:0009126,GO:0009128,GO:0009150,GO:0009154,GO:0009158,GO:0009161,GO:0009166,GO:0009167,GO:0009169,GO:…	T
Mj-10383	XP_027231073.1	mucin-5AC-like isoform X3 [Penaeus vannamei]	74.95	0	558	#N/A	#N/A
Mj-10473	#N/A	#N/A	#N/A	#N/A	#N/A	#N/A	#N/A
Mj-10476	ROT83391.1	septin [Penaeus vannamei]	98.84	7e-118	365	GO:0000003,GO:0000278,GO:0000281,GO:0000910,GO:0003006,GO:0003674,GO:0003824,GO:0003924,GO:0005488,GO:0005515,GO:0005575,GO:0005622,GO:0005623,GO:0005737,GO:0005856,GO:0005938,GO:0005940,GO:0007049,GO:0007275,GO:0007276,GO:0007281,GO:0007292,GO:0007295,GO:0007349,GO:0007444,GO:0008150,GO:0009653,GO:0009888,GO:0009987,GO:0016462,GO:0016787,GO:0016817,GO:0016818,GO:0017111,GO:0019953,GO:0022402,GO:…	D
Mj-10489	XP_027233300.1	protein split ends-like, partial [Penaeus vannamei]	85.69	0	3397	#N/A	A
Mj-10497	#N/A	#N/A	#N/A	#N/A	#N/A	#N/A	#N/A
Mj-10499	XP_027223621.1	vesicle-associated membrane protein 3-like isoform X1 [Penaeus vannamei]	90.74	5e-41	143	#N/A	U
Mj-105	XP_027213384.1	serine-rich adhesin for platelets-like [Penaeus vannamei]	97.37	0	2201	#N/A	T
Mj-10514	XP_027236503.1	serine/threonine-protein kinase 10-like isoform X2 [Penaeus vannamei]	94.1	0	2242	GO:0000132,GO:0000226,GO:0000278,GO:0000281,GO:0000902,GO:0000910,GO:0001932,GO:0001934,GO:0003674,GO:0003824,GO:0004672,GO:0004674,GO:0005575,GO:0005622,GO:0005623,GO:0005737,GO:0005819,GO:0005856,GO:0005886,GO:0005938,GO:0006464,GO:0006468,GO:0006793,GO:0006796,GO:0006807,GO:0006950,GO:0006996,GO:0007010,GO:0007017,GO:0007049,GO:0007051,GO:0007052,GO:0007088,GO:0007091,GO:0007154,GO:0007163,GO:…	T
Mj-10536	XP_027237511.1	uncharacterized protein LOC113828695 isoform X4 [Penaeus vannamei]	99.25	0	1285	GO:0001654,GO:0002009,GO:0002165,GO:0003674,GO:0003824,GO:0004672,GO:0004674,GO:0005488,GO:0005515,GO:0005575,GO:0005622,GO:0005623,GO:0005634,GO:0006464,GO:0006468,GO:0006793,GO:0006796,GO:0006807,GO:0007275,GO:0007423,GO:0007444,GO:0007472,GO:0007476,GO:0007552,GO:0007560,GO:0008013,GO:0008134,GO:0008150,GO:0008152,GO:0008586,GO:0008587,GO:0008589,GO:0008593,GO:0009605,GO:0009628,GO:0009629,GO:…	T
Mj-1054	#N/A	#N/A	#N/A	#N/A	#N/A	#N/A	#N/A
Mj-10633	XP_027234641.1	LOW QUALITY PROTEIN: protein phosphatase 1 regulatory subunit 37-like [Penaeus vannamei]	85.41	0	1783	GO:0008150,GO:0009892,GO:0010563,GO:0010921,GO:0010923,GO:0019220,GO:0019222,GO:0031323,GO:0031324,GO:0035303,GO:0035305,GO:0043086,GO:0044092,GO:0045936,GO:0048519,GO:0048523,GO:0050789,GO:0050790,GO:0050794,GO:0051174,GO:0051336,GO:0051346,GO:0065007,GO:0065009	A
Mj-10815	#N/A	#N/A	#N/A	#N/A	#N/A	#N/A	#N/A
Mj-1086	#N/A	#N/A	#N/A	#N/A	#N/A	#N/A	#N/A
Mj-10863	XP_027228708.1	uncharacterized protein LOC113820575 [Penaeus vannamei]	86.36	6e-62	197	#N/A	#N/A
Mj-10872	ROT76605.1	histone H3.3 [Penaeus vannamei]	100	6e-89	273	#N/A	B
Mj-10913	#N/A	#N/A	#N/A	#N/A	#N/A	#N/A	#N/A
Mj-10950	ROT78153.1	putative adenosine deaminase-like protein [Penaeus vannamei]	88.67	0	628	GO:0003674,GO:0003824,GO:0004000,GO:0005575,GO:0005622,GO:0005623,GO:0005737,GO:0005829,GO:0006139,GO:0006152,GO:0006154,GO:0006725,GO:0006807,GO:0008150,GO:0008152,GO:0009056,GO:0009058,GO:0009116,GO:0009119,GO:0009163,GO:0009164,GO:0009987,GO:0016787,GO:0016810,GO:0016814,GO:0017144,GO:0018130,GO:0019239,GO:0019438,GO:0019439,GO:0034404,GO:0034641,GO:0034654,GO:0034655,GO:0034656,GO:0042278,GO:…	F
Mj-10968	XP_027207887.1	KAT8 regulatory NSL complex subunit 1-like isoform X2 [Penaeus vannamei]	96.63	0	825	GO:0000003,GO:0000123,GO:0002164,GO:0003006,GO:0003674,GO:0003682,GO:0005488,GO:0005515,GO:0005575,GO:0005622,GO:0005623,GO:0005634,GO:0005654,GO:0005694,GO:0005700,GO:0005705,GO:0005737,GO:0006355,GO:0007275,GO:0007276,GO:0007281,GO:0007292,GO:0007293,GO:0007525,GO:0007526,GO:0007528,GO:0008150,GO:0008283,GO:0009653,GO:0009791,GO:0009889,GO:0009891,GO:0009893,GO:0009987,GO:0010468,GO:0010556,GO:…	S
Mj-1100	XP_027232148.1	uncharacterized protein LOC113823669 [Penaeus vannamei]	92.59	7e-24	102	#N/A	#N/A
Mj-11009	XP_027221530.1	DNA damage-binding protein 2-like [Penaeus vannamei]	83.25	2e-104	313	#N/A	S
Mj-11031	ROT64766.1	putative 60S ribosomal protein L14 [Penaeus vannamei]	86.39	1e-94	280	#N/A	J
Mj-11051	XP_027217743.1	40S ribosomal protein S13 [Penaeus vannamei]	99.34	5e-105	303	GO:0002181,GO:0003674,GO:0003676,GO:0003723,GO:0003735,GO:0005198,GO:0005488,GO:0005575,GO:0005622,GO:0005623,GO:0005634,GO:0005730,GO:0005737,GO:0005829,GO:0005840,GO:0006412,GO:0006518,GO:0006807,GO:0008150,GO:0008152,GO:0009058,GO:0009059,GO:0009987,GO:0010467,GO:0015935,GO:0019538,GO:0019843,GO:0022626,GO:0022627,GO:0031974,GO:0031981,GO:0032991,GO:0034641,GO:0034645,GO:0043043,GO:0043170,GO:…	J
Mj-11105	#N/A	#N/A	#N/A	#N/A	#N/A	#N/A	#N/A
Mj-11111	XP_027234076.1	arginine and glutamate-rich protein 1-A-like isoform X1 [Penaeus vannamei]	88.66	2e-61	208	#N/A	#N/A
Mj-11118	XP_027213881.1	protein lingerer-like isoform X2 [Penaeus vannamei]	100	2e-57	199	GO:0000003,GO:0000932,GO:0002009,GO:0002064,GO:0002065,GO:0002066,GO:0003002,GO:0003006,GO:0003674,GO:0005488,GO:0005515,GO:0005575,GO:0005622,GO:0005623,GO:0005634,GO:0005737,GO:0006355,GO:0007163,GO:0007275,GO:0007276,GO:0007281,GO:0007292,GO:0007338,GO:0007339,GO:0007389,GO:0007610,GO:0007617,GO:0007618,GO:0007620,GO:0008037,GO:0008069,GO:0008150,GO:0009566,GO:0009653,GO:0009798,GO:0009888,GO:…	S
Mj-11119	XP_027237177.1	filamin-A-like [Penaeus vannamei]	66.54	0	1934	GO:0000003,GO:0000902,GO:0000904,GO:0002009,GO:0002064,GO:0002065,GO:0002066,GO:0002682,GO:0002683,GO:0003006,GO:0003008,GO:0003674,GO:0003779,GO:0005488,GO:0005515,GO:0005575,GO:0005576,GO:0005622,GO:0005623,GO:0005737,GO:0005856,GO:0005886,GO:0006810,GO:0006928,GO:0006935,GO:0006996,GO:0007010,GO:0007015,GO:0007275,GO:0007276,GO:0007281,GO:0007292,GO:0007293,GO:0007300,GO:0007301,GO:0007303,GO:…	Z
Mj-11122	ROT73164.1	RhoA [Penaeus vannamei]	100	5e-124	375	GO:0000003,GO:0000278,GO:0000281,GO:0000902,GO:0000904,GO:0000910,GO:0000912,GO:0000915,GO:0001654,GO:0001655,GO:0001667,GO:0001700,GO:0001703,GO:0001736,GO:0001738,GO:0001745,GO:0001932,GO:0001934,GO:0002009,GO:0002064,GO:0002065,GO:0002066,GO:0002165,GO:0002376,GO:0002520,GO:0003006,GO:0003674,GO:0003824,GO:0003924,GO:0005488,GO:0005515,GO:0005575,GO:0005622,GO:0005623,GO:0005737,GO:0005911,GO:…	U	phagocytosis-related
Mj-11124	XP_027228199.1	moesin/ezrin/radixin homolog 1-like isoform X3 [Penaeus vannamei]	99.13	0	1035	GO:0000003,GO:0000226,GO:0000578,GO:0000785,GO:0000902,GO:0000904,GO:0001654,GO:0001745,GO:0001751,GO:0001754,GO:0002009,GO:0002164,GO:0002165,GO:0002168,GO:0003002,GO:0003006,GO:0003674,GO:0003779,GO:0005488,GO:0005515,GO:0005543,GO:0005546,GO:0005575,GO:0005622,GO:0005623,GO:0005634,GO:0005694,GO:0005700,GO:0005703,GO:0005737,GO:0005819,GO:0005829,GO:0005856,GO:0005886,GO:0005911,GO:0005912,GO:…	Z
Mj-11132	XP_027234322.1	tax1-binding protein 1 homolog [Penaeus vannamei]	94.13	0	621	#N/A	A
Mj-11138	ROT61424.1	ribosomal protein S24 [Penaeus vannamei]	99.23	3e-91	266	GO:0002181,GO:0003674,GO:0003735,GO:0005198,GO:0005575,GO:0005622,GO:0005623,GO:0005737,GO:0005829,GO:0005840,GO:0006412,GO:0006518,GO:0006807,GO:0008150,GO:0008152,GO:0009058,GO:0009059,GO:0009987,GO:0010467,GO:0015935,GO:0019538,GO:0022626,GO:0022627,GO:0032991,GO:0034641,GO:0034645,GO:0043043,GO:0043170,GO:0043226,GO:0043228,GO:0043229,GO:0043232,GO:0043603,GO:0043604,GO:0044237,GO:0044238,GO:…	J
Mj-11145	XP_027236253.1	thymosin beta-like isoform X2 [Penaeus vannamei]	78.93	1e-120	361	#N/A	#N/A
Mj-11149	XP_027217905.1	prickle planar cell polarity protein 3-like [Penaeus vannamei]	96.9	0	1117	#N/A	TZ
Mj-11157	#N/A	#N/A	#N/A	#N/A	#N/A	#N/A	#N/A
Mj-11168	ROT79482.1	hypothetical protein C7M84_001797 [Penaeus vannamei]	95.12	0	764	#N/A	Q
Mj-11183	ROT80578.1	Integrin-linked protein kinase [Penaeus vannamei]	98.22	0	928	GO:0000902,GO:0000904,GO:0002009,GO:0002165,GO:0003674,GO:0003824,GO:0004672,GO:0005488,GO:0005515,GO:0005575,GO:0005622,GO:0005623,GO:0005737,GO:0005912,GO:0005924,GO:0005925,GO:0006464,GO:0006468,GO:0006793,GO:0006796,GO:0006807,GO:0006996,GO:0007010,GO:0007016,GO:0007154,GO:0007155,GO:0007160,GO:0007165,GO:0007166,GO:0007229,GO:0007275,GO:0007444,GO:0007472,GO:0007475,GO:0007476,GO:0007517,GO:…	T	phagocytosis-related
Mj-11186	AXK59836.1	laminin binding protein [Penaeus vannamei]	98.78	8e-142	410	GO:0000028,GO:0000447,GO:0000460,GO:0000461,GO:0000462,GO:0000466,GO:0000469,GO:0000478,GO:0000479,GO:0002181,GO:0003674,GO:0003735,GO:0005198,GO:0005488,GO:0005575,GO:0005622,GO:0005623,GO:0005737,GO:0005829,GO:0005840,GO:0006139,GO:0006364,GO:0006396,GO:0006403,GO:0006405,GO:0006407,GO:0006412,GO:0006518,GO:0006611,GO:0006725,GO:0006807,GO:0006810,GO:0006886,GO:0006913,GO:0006996,GO:0008104,GO:…	J
Mj-11192	ROT75919.1	ribosomal protein L17 [Penaeus vannamei]	99.46	1e-114	330	GO:0002181,GO:0003674,GO:0003735,GO:0005198,GO:0005575,GO:0005622,GO:0005623,GO:0005737,GO:0005829,GO:0005840,GO:0006412,GO:0006518,GO:0006807,GO:0008150,GO:0008152,GO:0009058,GO:0009059,GO:0009987,GO:0010467,GO:0015934,GO:0019538,GO:0022625,GO:0022626,GO:0032991,GO:0034641,GO:0034645,GO:0043043,GO:0043170,GO:0043226,GO:0043228,GO:0043229,GO:0043232,GO:0043603,GO:0043604,GO:0044237,GO:0044238,GO:…	J
Mj-11197	ROT79514.1	hypothetical protein C7M84_001778 [Penaeus vannamei]	78.29	1e-70	232	#N/A	#N/A
Mj-1121	#N/A	#N/A	#N/A	#N/A	#N/A	#N/A	#N/A
Mj-11215	#N/A	#N/A	#N/A	#N/A	#N/A	#N/A	#N/A
Mj-1133	XP_037779996.1	tumor necrosis factor alpha-induced protein 8-like protein [Penaeus monodon]	96.89	9e-97	311	GO:0001932,GO:0001934,GO:0003674,GO:0004857,GO:0004866,GO:0004869,GO:0005575,GO:0005622,GO:0005623,GO:0005737,GO:0006915,GO:0007275,GO:0007431,GO:0007435,GO:0008150,GO:0008219,GO:0009653,GO:0009887,GO:0009892,GO:0009893,GO:0009894,GO:0009966,GO:0009967,GO:0009987,GO:0010466,GO:0010506,GO:0010562,GO:0010604,GO:0010605,GO:0010646,GO:0010647,GO:0010941,GO:0010942,GO:0010951,GO:0012501,GO:0019220,GO:…	S
Mj-11351	#N/A	#N/A	#N/A	#N/A	#N/A	#N/A	#N/A
Mj-11359	ROT83394.1	putative pre-mRNA-splicing factor 18 isoform X1 [Penaeus vannamei]	97.13	0	662	GO:0000350,GO:0000375,GO:0000377,GO:0000393,GO:0000398,GO:0000956,GO:0005575,GO:0005622,GO:0005623,GO:0005634,GO:0005681,GO:0005682,GO:0005684,GO:0006139,GO:0006396,GO:0006397,GO:0006401,GO:0006402,GO:0006403,GO:0006725,GO:0006807,GO:0008150,GO:0008152,GO:0008298,GO:0008380,GO:0009056,GO:0009057,GO:0009892,GO:0009987,GO:0010467,GO:0010468,GO:0010605,GO:0010629,GO:0016043,GO:0016070,GO:0016071,GO:…	A
Mj-11392	XP_027229510.1	40S ribosomal protein S24-like isoform X3 [Penaeus vannamei]	93.75	4e-79	247	GO:0000462,GO:0002181,GO:0003674,GO:0003735,GO:0005198,GO:0005575,GO:0005622,GO:0005623,GO:0005737,GO:0005829,GO:0005840,GO:0006139,GO:0006364,GO:0006396,GO:0006412,GO:0006518,GO:0006725,GO:0006807,GO:0008150,GO:0008152,GO:0009058,GO:0009059,GO:0009987,GO:0010467,GO:0015935,GO:0016070,GO:0016072,GO:0019538,GO:0022613,GO:0022626,GO:0022627,GO:0030490,GO:0032991,GO:0034470,GO:0034641,GO:0034645,GO:…	J
Mj-11450	ROT82228.1	putative 60S ribosomal protein L28 [Penaeus vannamei]	92.97	3e-71	216	GO:0002181,GO:0003674,GO:0003735,GO:0005198,GO:0005575,GO:0005622,GO:0005623,GO:0005737,GO:0005829,GO:0005840,GO:0006412,GO:0006518,GO:0006807,GO:0008150,GO:0008152,GO:0009058,GO:0009059,GO:0009987,GO:0010467,GO:0015934,GO:0019538,GO:0022625,GO:0022626,GO:0032991,GO:0034641,GO:0034645,GO:0043043,GO:0043170,GO:0043226,GO:0043228,GO:0043229,GO:0043232,GO:0043603,GO:0043604,GO:0044237,GO:0044238,GO:…	J
Mj-11455	ROT85429.1	putative 60S ribosomal protein L38 [Penaeus vannamei]	100	1e-43	141	GO:0002181,GO:0003674,GO:0003676,GO:0003723,GO:0003735,GO:0005198,GO:0005488,GO:0005575,GO:0005622,GO:0005623,GO:0005737,GO:0005829,GO:0005840,GO:0006412,GO:0006518,GO:0006807,GO:0008150,GO:0008152,GO:0009058,GO:0009059,GO:0009987,GO:0010467,GO:0015934,GO:0016043,GO:0019538,GO:0022607,GO:0022613,GO:0022618,GO:0022625,GO:0022626,GO:0032991,GO:0034622,GO:0034641,GO:0034645,GO:0043043,GO:0043170,GO:…	J
Mj-11478	ROT73282.1	putative beclin-1-like protein isoform X1 [Penaeus vannamei]	99.53	0	811	GO:0000045,GO:0000272,GO:0000407,GO:0002165,GO:0002376,GO:0002520,GO:0002790,GO:0005575,GO:0005622,GO:0005623,GO:0005737,GO:0005942,GO:0005975,GO:0005976,GO:0005977,GO:0005980,GO:0006073,GO:0006091,GO:0006112,GO:0006810,GO:0006897,GO:0006914,GO:0006950,GO:0006979,GO:0006995,GO:0006996,GO:0007033,GO:0007034,GO:0007154,GO:0007275,GO:0007399,GO:0007552,GO:0008104,GO:0008150,GO:0008152,GO:0008219,GO:…	T
Mj-1157	#N/A	#N/A	#N/A	#N/A	#N/A	#N/A	#N/A
Mj-11613	ROT74187.1	hypothetical protein C7M84_007304, partial [Penaeus vannamei]	96.66	0	643	GO:0000226,GO:0001654,GO:0001745,GO:0001751,GO:0001754,GO:0002164,GO:0003674,GO:0005488,GO:0005515,GO:0005575,GO:0005622,GO:0005623,GO:0005634,GO:0005635,GO:0005640,GO:0005737,GO:0006810,GO:0006869,GO:0006928,GO:0006996,GO:0006997,GO:0007010,GO:0007017,GO:0007018,GO:0007097,GO:0007275,GO:0007317,GO:0007399,GO:0007423,GO:0007424,GO:0007517,GO:0007522,GO:0007523,GO:0007591,GO:0007593,GO:0008092,GO:…	S
Mj-1162	XP_027206851.1	plasminogen activator inhibitor 1 RNA-binding protein-like [Penaeus vannamei]	93.65	1e-135	419	GO:0003674,GO:0003676,GO:0003723,GO:0003729,GO:0005488,GO:0005515,GO:0005575,GO:0005622,GO:0005623,GO:0005634,GO:0005694,GO:0005700,GO:0005701,GO:0005703,GO:0005737,GO:0006325,GO:0006355,GO:0006464,GO:0006479,GO:0006807,GO:0006996,GO:0008150,GO:0008152,GO:0008213,GO:0009889,GO:0009892,GO:0009987,GO:0010369,GO:0010468,GO:0010556,GO:0010605,GO:0010608,GO:0010629,GO:0016043,GO:0016246,GO:0016441,GO:…	S
Mj-11646	ROT67240.1	Round spermatid basic protein 1 [Penaeus vannamei]	97.88	0	780	#N/A	S
Mj-11668	ROT84576.1	putative rRNA-processing protein FCF1-like [Penaeus vannamei]	91.75	4e-126	368	GO:0000462,GO:0005575,GO:0005622,GO:0005623,GO:0005634,GO:0005730,GO:0006139,GO:0006364,GO:0006396,GO:0006725,GO:0006807,GO:0008150,GO:0008152,GO:0009987,GO:0010467,GO:0016070,GO:0016072,GO:0022613,GO:0030490,GO:0030684,GO:0031974,GO:0031981,GO:0032040,GO:0032991,GO:0034470,GO:0034641,GO:0034660,GO:0042254,GO:0042274,GO:0043170,GO:0043226,GO:0043227,GO:0043228,GO:0043229,GO:0043231,GO:0043232,GO:…	S
Mj-11673	#N/A	#N/A	#N/A	#N/A	#N/A	GO:0000902,GO:0000904,GO:0001932,GO:0001933,GO:0003674,GO:0003824,GO:0004812,GO:0004830,GO:0004857,GO:0005488,GO:0005515,GO:0005575,GO:0005622,GO:0005623,GO:0005634,GO:0005737,GO:0005829,GO:0006082,GO:0006139,GO:0006399,GO:0006412,GO:0006418,GO:0006436,GO:0006469,GO:0006518,GO:0006520,GO:0006725,GO:0006807,GO:0007275,GO:0007399,GO:0008150,GO:0008152,GO:0008285,GO:0009058,GO:0009059,GO:0009653,GO:…	J
Mj-11677	XP_027213980.1	uncharacterized protein LOC113807006 [Penaeus vannamei]	94.87	9e-25	106	#N/A	#N/A
Mj-11678	BAH98112.1	GTP binding protein alpha subunit Gs [Penaeus japonicus]	100	0	759	GO:0001664,GO:0002009,GO:0002165,GO:0003008,GO:0003674,GO:0003824,GO:0003924,GO:0005102,GO:0005488,GO:0005515,GO:0005575,GO:0005576,GO:0005604,GO:0005622,GO:0005623,GO:0005834,GO:0005886,GO:0007154,GO:0007165,GO:0007186,GO:0007187,GO:0007188,GO:0007189,GO:0007191,GO:0007212,GO:0007267,GO:0007268,GO:0007275,GO:0007444,GO:0007472,GO:0007476,GO:0007528,GO:0007552,GO:0007560,GO:0007600,GO:0007606,GO:…	T
Mj-1181	#N/A	#N/A	#N/A	#N/A	#N/A	#N/A	#N/A
Mj-11828	XP_027235384.1	LOW QUALITY PROTEIN: uncharacterized protein LOC113826695 [Penaeus vannamei]	86.87	2e-51	178	GO:0002009,GO:0002165,GO:0003674,GO:0005198,GO:0005201,GO:0005575,GO:0005576,GO:0007275,GO:0007424,GO:0007444,GO:0007472,GO:0007475,GO:0007476,GO:0007552,GO:0007560,GO:0007591,GO:0008150,GO:0008362,GO:0008587,GO:0009653,GO:0009791,GO:0009886,GO:0009887,GO:0009888,GO:0022404,GO:0031012,GO:0032501,GO:0032502,GO:0035107,GO:0035114,GO:0035120,GO:0035220,GO:0035239,GO:0035295,GO:0040003,GO:0040005,GO:…	T
Mj-1184	XP_027220723.1	CXXC-type zinc finger protein 1-like [Penaeus vannamei]	96.08	0	968	GO:0005575,GO:0005622,GO:0005623,GO:0005634,GO:0005654,GO:0006325,GO:0006464,GO:0006479,GO:0006807,GO:0006996,GO:0008150,GO:0008152,GO:0008213,GO:0009987,GO:0016043,GO:0016569,GO:0016570,GO:0016571,GO:0018022,GO:0018193,GO:0018205,GO:0019538,GO:0031974,GO:0031981,GO:0032259,GO:0032991,GO:0034708,GO:0034968,GO:0035097,GO:0036211,GO:0043170,GO:0043226,GO:0043227,GO:0043229,GO:0043231,GO:0043233,GO:…	O
Mj-11947	ROT73271.1	transcription factor ATF-b [Penaeus vannamei]	64.08	0	629	#N/A	#N/A
Mj-11980	XP_027210626.1	mRNA-capping enzyme-like [Penaeus vannamei]	94.38	0	955	GO:0003674,GO:0003824,GO:0004484,GO:0004721,GO:0005575,GO:0005622,GO:0005623,GO:0005634,GO:0005737,GO:0006139,GO:0006370,GO:0006396,GO:0006397,GO:0006464,GO:0006470,GO:0006725,GO:0006793,GO:0006796,GO:0006807,GO:0008138,GO:0008150,GO:0008152,GO:0008192,GO:0008589,GO:0009452,GO:0009966,GO:0009967,GO:0009987,GO:0010467,GO:0010646,GO:0010647,GO:0016070,GO:0016071,GO:0016311,GO:0016740,GO:0016772,GO:…	A
Mj-12	XP_027232699.1	titin-like [Penaeus vannamei]	68.29	0	3326	#N/A	#N/A
Mj-121	ROT67998.1	putative angiopoietin-1 receptor [Penaeus vannamei]	59	0	851	#N/A	T
Mj-12124	XP_027228278.1	E3 ubiquitin-protein ligase RING1-like [Penaeus vannamei]	99.16	0	603	GO:0000003,GO:0000151,GO:0000152,GO:0000228,GO:0000785,GO:0000790,GO:0000902,GO:0000904,GO:0002009,GO:0002064,GO:0002065,GO:0002066,GO:0003006,GO:0003674,GO:0005488,GO:0005515,GO:0005575,GO:0005622,GO:0005623,GO:0005634,GO:0005635,GO:0005694,GO:0005730,GO:0006325,GO:0006342,GO:0006355,GO:0006464,GO:0006513,GO:0006807,GO:0006996,GO:0007275,GO:0007276,GO:0007281,GO:0007292,GO:0007293,GO:0007399,GO:…	O
Mj-1214	XP_027211117.1	type-2 ice-structuring protein-like [Penaeus vannamei]	77.02	3e-134	411	#N/A	TV
Mj-12161	#N/A	#N/A	#N/A	#N/A	#N/A	#N/A	#N/A
Mj-1218	XP_037780508.1	Krueppel-like factor 6 [Penaeus monodon]	100	2e-70	231	GO:0000902,GO:0000904,GO:0000976,GO:0000977,GO:0000978,GO:0000981,GO:0000982,GO:0000987,GO:0001012,GO:0001067,GO:0001077,GO:0001228,GO:0003674,GO:0003676,GO:0003677,GO:0003690,GO:0003700,GO:0003712,GO:0003713,GO:0005488,GO:0006139,GO:0006351,GO:0006355,GO:0006357,GO:0006366,GO:0006725,GO:0006807,GO:0006928,GO:0006935,GO:0007275,GO:0007399,GO:0007409,GO:0007411,GO:0008150,GO:0008152,GO:0008270,GO:…	K
Mj-1222	XP_027236925.1	protein kintoun-like [Penaeus vannamei]	83.22	0	1100	GO:0003674,GO:0005488,GO:0005515,GO:0008157,GO:0019899,GO:0019902,GO:0019903	Z
Mj-1229	#N/A	#N/A	#N/A	#N/A	#N/A	#N/A	#N/A
Mj-1231	ROT76299.1	Cdc42-like protein [Penaeus vannamei]	100	3e-129	394	GO:0000003,GO:0000165,GO:0000902,GO:0000904,GO:0001700,GO:0001763,GO:0001932,GO:0001934,GO:0002009,GO:0002064,GO:0002065,GO:0002066,GO:0002165,GO:0002252,GO:0002376,GO:0002520,GO:0003006,GO:0003008,GO:0003014,GO:0003674,GO:0003824,GO:0003924,GO:0005488,GO:0005515,GO:0005575,GO:0005622,GO:0005623,GO:0005634,GO:0005737,GO:0005912,GO:0005938,GO:0006464,GO:0006468,GO:0006582,GO:0006725,GO:0006793,GO:…	U
Mj-12431	XP_027217105.1	nucleolar protein 4-like [Penaeus vannamei]	96.24	4e-109	322	GO:0005575,GO:0005622,GO:0005623,GO:0005634,GO:0005654,GO:0031974,GO:0031981,GO:0043226,GO:0043227,GO:0043229,GO:0043231,GO:0043233,GO:0044422,GO:0044424,GO:0044428,GO:0044446,GO:0044464,GO:0070013	S
Mj-12440	XP_027209256.1	forkhead box protein N3-like [Penaeus vannamei]	96.46	0	897	GO:0000075,GO:0000077,GO:0000278,GO:0000976,GO:0000981,GO:0001067,GO:0001666,GO:0003674,GO:0003676,GO:0003677,GO:0003690,GO:0003700,GO:0005488,GO:0005575,GO:0005622,GO:0005623,GO:0005634,GO:0006355,GO:0006357,GO:0006950,GO:0006974,GO:0007049,GO:0007093,GO:0007275,GO:0007346,GO:0007507,GO:0008150,GO:0009628,GO:0009653,GO:0009790,GO:0009888,GO:0009889,GO:0009987,GO:0010468,GO:0010556,GO:0010564,GO:…	K
Mj-12473	XP_037779894.1	proteoglycan 4-like isoform X4 [Penaeus monodon]	82.88	1e-93	301	GO:0002009,GO:0003674,GO:0005102,GO:0005178,GO:0005488,GO:0005515,GO:0005575,GO:0005576,GO:0007275,GO:0008150,GO:0009653,GO:0009888,GO:0031012,GO:0032501,GO:0032502,GO:0035239,GO:0035295,GO:0044421,GO:0044877,GO:0048729,GO:0048856,GO:0050839,GO:0060429,GO:0060562	S
Mj-12512	XP_027234195.1	CDC42 small effector protein 2-like [Penaeus vannamei]	96.7	3e-46	162	#N/A	#N/A
Mj-12516	#N/A	#N/A	#N/A	#N/A	#N/A	#N/A	#N/A
Mj-12560	#N/A	#N/A	#N/A	#N/A	#N/A	#N/A	#N/A
Mj-12603	XP_027226477.1	rho GTPase-activating protein 21-like isoform X8 [Penaeus vannamei]	97.02	0	1168	GO:0002009,GO:0002165,GO:0003674,GO:0005096,GO:0007154,GO:0007165,GO:0007264,GO:0007265,GO:0007266,GO:0007275,GO:0007444,GO:0007478,GO:0007480,GO:0007552,GO:0007560,GO:0008047,GO:0008150,GO:0009653,GO:0009791,GO:0009886,GO:0009887,GO:0009888,GO:0009987,GO:0023052,GO:0030234,GO:0030695,GO:0032501,GO:0032502,GO:0035107,GO:0035114,GO:0035120,GO:0035218,GO:0035239,GO:0035295,GO:0035556,GO:0043085,GO:…	T
Mj-12613	ROT81589.1	60S acidic ribosomal protein P2 [Penaeus vannamei]	91.89	5e-24	94	GO:0000322,GO:0000323,GO:0000324,GO:0001932,GO:0001934,GO:0002181,GO:0002182,GO:0003674,GO:0003735,GO:0005198,GO:0005575,GO:0005622,GO:0005623,GO:0005737,GO:0005773,GO:0005829,GO:0005840,GO:0006412,GO:0006414,GO:0006518,GO:0006807,GO:0008047,GO:0008150,GO:0008152,GO:0009058,GO:0009059,GO:0009893,GO:0009987,GO:0010467,GO:0010562,GO:0010604,GO:0015934,GO:0019207,GO:0019209,GO:0019220,GO:0019222,GO:…	J
Mj-12622	XP_027228783.1	uncharacterized protein LOC113820643 [Penaeus vannamei]	61.16	1e-66	223	#N/A	#N/A
Mj-12623	AGI97279.1	activating transcription factor 4 [Penaeus vannamei]	85.06	0	621	#N/A	#N/A
Mj-12627	ROT61910.1	serine proteinase inhibitor B3 [Penaeus vannamei]	88.78	0	655	GO:0002682,GO:0002683,GO:0003674,GO:0004857,GO:0004866,GO:0004867,GO:0005575,GO:0005576,GO:0005615,GO:0006950,GO:0008150,GO:0009611,GO:0009892,GO:0010466,GO:0010605,GO:0010951,GO:0019222,GO:0030162,GO:0030234,GO:0030414,GO:0031323,GO:0031324,GO:0031347,GO:0031348,GO:0032268,GO:0032269,GO:0035007,GO:0035009,GO:0043086,GO:0043455,GO:0044092,GO:0044421,GO:0045088,GO:0045824,GO:0045861,GO:0048519,GO:…	V
Mj-12638	XP_027229228.1	talin-2-like isoform X1 [Penaeus vannamei]	98.93	0	5222	GO:0000003,GO:0001667,GO:0001700,GO:0001894,GO:0002009,GO:0002064,GO:0002065,GO:0002066,GO:0002164,GO:0002165,GO:0003006,GO:0003674,GO:0003779,GO:0005102,GO:0005178,GO:0005488,GO:0005515,GO:0005575,GO:0005912,GO:0005924,GO:0005925,GO:0006355,GO:0006928,GO:0006996,GO:0007010,GO:0007016,GO:0007155,GO:0007275,GO:0007276,GO:0007281,GO:0007292,GO:0007297,GO:0007298,GO:0007390,GO:0007424,GO:0007444,GO:…	Z
Mj-12651	XP_027217037.1	uncharacterized protein LOC113809601 [Penaeus vannamei]	86.61	0	893	#N/A	G
Mj-12653	ROT82693.1	putative receptor-type tyrosine-protein phosphatase epsilon isoform X4 [Penaeus vannamei]	70.5	0	721	GO:0000902,GO:0000904,GO:0003008,GO:0003674,GO:0003824,GO:0004721,GO:0004725,GO:0004888,GO:0005001,GO:0005575,GO:0005623,GO:0005886,GO:0006464,GO:0006470,GO:0006793,GO:0006796,GO:0006807,GO:0006928,GO:0006935,GO:0007154,GO:0007165,GO:0007275,GO:0007399,GO:0007409,GO:0007411,GO:0007417,GO:0007424,GO:0007610,GO:0007611,GO:0007613,GO:0007616,GO:0008045,GO:0008150,GO:0008152,GO:0009605,GO:0009653,GO:…	T
Mj-12667	XP_037780528.1	serine/threonine-protein phosphatase 2A 55 kDa regulatory subunit B alpha isoform isoform X1 [Penaeus monodon]	97.11	0	983	GO:0000159,GO:0000226,GO:0000278,GO:0001700,GO:0003002,GO:0003674,GO:0003824,GO:0004721,GO:0004722,GO:0005575,GO:0005622,GO:0005623,GO:0005634,GO:0005737,GO:0006464,GO:0006470,GO:0006793,GO:0006796,GO:0006807,GO:0006996,GO:0007010,GO:0007017,GO:0007049,GO:0007088,GO:0007091,GO:0007098,GO:0007099,GO:0007163,GO:0007275,GO:0007346,GO:0007389,GO:0007399,GO:0007405,GO:0007406,GO:0007423,GO:0007444,GO:…	T
Mj-12711	#N/A	#N/A	#N/A	#N/A	#N/A	#N/A	#N/A
Mj-12722	ROT65153.1	hypothetical protein C7M84_016904 [Penaeus vannamei]	99.07	0	2143	GO:0003674,GO:0005096,GO:0005102,GO:0005488,GO:0005515,GO:0007154,GO:0007165,GO:0007264,GO:0007265,GO:0007266,GO:0007275,GO:0007399,GO:0007414,GO:0007415,GO:0007417,GO:0007420,GO:0008037,GO:0008038,GO:0008047,GO:0008150,GO:0008361,GO:0009987,GO:0010769,GO:0010975,GO:0016043,GO:0016319,GO:0022008,GO:0022603,GO:0022604,GO:0023052,GO:0030030,GO:0030154,GO:0030182,GO:0030215,GO:0030234,GO:0030695,GO:…	T
Mj-12728	XP_027227341.1	acetyl-coenzyme A synthetase, cytoplasmic-like [Penaeus vannamei]	95.49	0	1328	GO:0003674,GO:0003824,GO:0006082,GO:0006629,GO:0006631,GO:0006633,GO:0007610,GO:0008150,GO:0008152,GO:0008610,GO:0009058,GO:0009636,GO:0009987,GO:0010033,GO:0015645,GO:0016053,GO:0016874,GO:0016877,GO:0016878,GO:0019752,GO:0030534,GO:0032501,GO:0032787,GO:0042221,GO:0042493,GO:0043436,GO:0044237,GO:0044238,GO:0044249,GO:0044255,GO:0044281,GO:0044283,GO:0045471,GO:0046394,GO:0046677,GO:0048149,GO:…	I
Mj-1275	XP_027228516.1	LOW QUALITY PROTEIN: serine/threonine-protein phosphatase PP1-beta catalytic subunit-like [Penaeus vannamei]	87.78	0	572	#N/A	T
Mj-12837	#N/A	#N/A	#N/A	#N/A	#N/A	#N/A	#N/A
Mj-12862	ROT72679.1	putative 60S ribosomal protein L18a-like [Penaeus vannamei]	97.28	5e-133	377	GO:0002181,GO:0003674,GO:0003676,GO:0003723,GO:0003735,GO:0005198,GO:0005488,GO:0005575,GO:0005622,GO:0005623,GO:0005737,GO:0005829,GO:0005840,GO:0006412,GO:0006518,GO:0006807,GO:0008150,GO:0008152,GO:0009058,GO:0009059,GO:0009987,GO:0010467,GO:0015934,GO:0019538,GO:0022625,GO:0022626,GO:0032991,GO:0034641,GO:0034645,GO:0043043,GO:0043170,GO:0043226,GO:0043228,GO:0043229,GO:0043232,GO:0043603,GO:…	J
Mj-12964	ROT74080.1	hypothetical protein C7M84_007436 [Penaeus vannamei]	96.15	0	4450	GO:0000902,GO:0005575,GO:0005622,GO:0005623,GO:0005737,GO:0005975,GO:0005976,GO:0005977,GO:0006073,GO:0006091,GO:0006112,GO:0006629,GO:0006638,GO:0006639,GO:0006641,GO:0008150,GO:0008152,GO:0008610,GO:0009058,GO:0009653,GO:0009743,GO:0009744,GO:0009987,GO:0010033,GO:0015980,GO:0016043,GO:0019432,GO:0032502,GO:0032989,GO:0034285,GO:0042221,GO:0043170,GO:0044042,GO:0044237,GO:0044238,GO:0044249,GO:…	I
Mj-13047	ROT85761.1	ribosomal protein L13 [Penaeus vannamei]	92.89	2e-113	329	GO:0002181,GO:0003674,GO:0003676,GO:0003723,GO:0003735,GO:0005198,GO:0005488,GO:0005575,GO:0005622,GO:0005623,GO:0005737,GO:0005829,GO:0005840,GO:0006412,GO:0006518,GO:0006807,GO:0008150,GO:0008152,GO:0009058,GO:0009059,GO:0009987,GO:0010467,GO:0015934,GO:0019538,GO:0022625,GO:0022626,GO:0032991,GO:0034641,GO:0034645,GO:0043043,GO:0043170,GO:0043226,GO:0043228,GO:0043229,GO:0043232,GO:0043603,GO:…	J
Mj-13057	XP_027219142.1	pre-mRNA-splicing factor CWC22 homolog isoform X1 [Penaeus vannamei]	82.1	0	1415	GO:0000375,GO:0000377,GO:0000398,GO:0003674,GO:0003676,GO:0003723,GO:0005488,GO:0005515,GO:0005575,GO:0005622,GO:0005623,GO:0005634,GO:0005681,GO:0005684,GO:0006139,GO:0006396,GO:0006397,GO:0006725,GO:0006807,GO:0008150,GO:0008152,GO:0008380,GO:0009987,GO:0010467,GO:0016070,GO:0016071,GO:0032991,GO:0034641,GO:0043170,GO:0043226,GO:0043227,GO:0043229,GO:0043231,GO:0044237,GO:0044238,GO:0044422,GO:…	S
Mj-13067	ROT68229.1	NADH dehydrogenase [Penaeus vannamei]	92.93	2e-63	201	GO:0003674,GO:0003824,GO:0003954,GO:0005575,GO:0005622,GO:0005623,GO:0005737,GO:0005739,GO:0005740,GO:0005743,GO:0005746,GO:0005747,GO:0006091,GO:0006119,GO:0006120,GO:0006139,GO:0006163,GO:0006725,GO:0006753,GO:0006793,GO:0006796,GO:0006807,GO:0008150,GO:0008152,GO:0009117,GO:0009123,GO:0009126,GO:0009141,GO:0009144,GO:0009150,GO:0009161,GO:0009167,GO:0009199,GO:0009205,GO:0009259,GO:0009987,GO:…	C
Mj-13076	AMQ26208.1	Rac1 [Penaeus vannamei]	100	3e-119	350	GO:0000003,GO:0000165,GO:0000768,GO:0000902,GO:0000904,GO:0001558,GO:0001654,GO:0001667,GO:0001700,GO:0001726,GO:0001736,GO:0001737,GO:0001738,GO:0001745,GO:0001751,GO:0001754,GO:0001932,GO:0001934,GO:0001952,GO:0001954,GO:0002009,GO:0002064,GO:0002065,GO:0002066,GO:0002118,GO:0002165,GO:0002252,GO:0002376,GO:0002433,GO:0002520,GO:0002682,GO:0002764,GO:0002768,GO:0003006,GO:0003008,GO:0003014,GO:…	U
Mj-1308	#N/A	#N/A	#N/A	#N/A	#N/A	#N/A	#N/A
Mj-13087	XP_027206404.1	zinc finger protein 609-like [Penaeus vannamei]	95.77	0	1408	GO:0000122,GO:0000902,GO:0000904,GO:0002009,GO:0002165,GO:0003002,GO:0003674,GO:0003712,GO:0003714,GO:0005575,GO:0005622,GO:0005623,GO:0005634,GO:0006355,GO:0006357,GO:0006928,GO:0006935,GO:0007154,GO:0007275,GO:0007389,GO:0007399,GO:0007409,GO:0007411,GO:0007412,GO:0007444,GO:0007447,GO:0007450,GO:0007472,GO:0007476,GO:0007552,GO:0007560,GO:0007610,GO:0007626,GO:0008150,GO:0008345,GO:0008589,GO:…	S
Mj-13116	XP_027234902.1	RING finger protein 141-like isoform X1 [Penaeus vannamei]	98.28	1e-173	537	#N/A	O
Mj-13127	AQY45917.1	mitogen-activated protein kinase kinase 4 [Penaeus vannamei]	98.52	0	694	GO:0000165,GO:0000187,GO:0001932,GO:0001934,GO:0003674,GO:0003824,GO:0004672,GO:0004674,GO:0004708,GO:0004712,GO:0005575,GO:0005622,GO:0005623,GO:0005737,GO:0006464,GO:0006468,GO:0006793,GO:0006796,GO:0006807,GO:0006950,GO:0007154,GO:0007165,GO:0007254,GO:0007257,GO:0007275,GO:0007346,GO:0007399,GO:0007564,GO:0008150,GO:0008152,GO:0009893,GO:0009966,GO:0009967,GO:0009987,GO:0010562,GO:0010604,GO:…	T	Cell growth-related
Mj-13130	#N/A	#N/A	#N/A	#N/A	#N/A	#N/A	#N/A
Mj-13135	XP_027215591.1	uncharacterized protein LOC113808378, partial [Penaeus vannamei]	90.7	0	1130	#N/A	S
Mj-13141	XP_027222761.1	chromobox protein homolog 1-like [Penaeus vannamei]	99.47	1e-97	300	#N/A	B
Mj-13146	XP_027232891.1	ras-related GTP-binding protein A isoform X1 [Penaeus vannamei]	99.69	0	663	GO:0000323,GO:0001101,GO:0001558,GO:0003674,GO:0003824,GO:0003924,GO:0005488,GO:0005515,GO:0005575,GO:0005622,GO:0005623,GO:0005634,GO:0005737,GO:0005764,GO:0005768,GO:0005773,GO:0005774,GO:0006950,GO:0007154,GO:0008150,GO:0009267,GO:0009605,GO:0009719,GO:0009894,GO:0009966,GO:0009967,GO:0009987,GO:0009991,GO:0010033,GO:0010243,GO:0010506,GO:0010646,GO:0010647,GO:0012505,GO:0016020,GO:0016462,GO:…	U
Mj-13171	ROT64661.1	translationally controlled tumor protein [Penaeus vannamei]	92.63	2e-123	358	GO:0000075,GO:0000077,GO:0000278,GO:0001932,GO:0001934,GO:0003674,GO:0005085,GO:0005488,GO:0005509,GO:0005515,GO:0005575,GO:0005622,GO:0005623,GO:0005634,GO:0005694,GO:0005700,GO:0005737,GO:0006139,GO:0006259,GO:0006281,GO:0006302,GO:0006725,GO:0006807,GO:0006950,GO:0006974,GO:0007049,GO:0007093,GO:0007095,GO:0007346,GO:0008017,GO:0008092,GO:0008150,GO:0008152,GO:0008361,GO:0009314,GO:0009628,GO:…	DZ
Mj-13203	#N/A	#N/A	#N/A	#N/A	#N/A	#N/A	#N/A
Mj-13241	ROT67210.1	Cofilin/actin-depolymerizing factor [Penaeus vannamei]	100	2e-96	305	GO:0000003,GO:0000226,GO:0000278,GO:0000281,GO:0000902,GO:0000904,GO:0000910,GO:0000912,GO:0000915,GO:0001654,GO:0001667,GO:0001736,GO:0001737,GO:0001738,GO:0001745,GO:0001751,GO:0001754,GO:0001894,GO:0002009,GO:0002064,GO:0002065,GO:0002066,GO:0002165,GO:0002791,GO:0002793,GO:0003002,GO:0003006,GO:0003674,GO:0003779,GO:0005488,GO:0005515,GO:0006928,GO:0006996,GO:0007010,GO:0007015,GO:0007017,GO:…	Z
Mj-13266	#N/A	#N/A	#N/A	#N/A	#N/A	#N/A	#N/A
Mj-13285	XP_027228505.1	cold shock domain-containing protein E1-like isoform X1 [Penaeus vannamei]	95.69	0	1697	GO:0003674,GO:0003676,GO:0003723,GO:0003729,GO:0003730,GO:0005488,GO:0005515,GO:0005575,GO:0005622,GO:0005623,GO:0005737,GO:0006417,GO:0007549,GO:0008150,GO:0009047,GO:0009889,GO:0009890,GO:0009892,GO:0009987,GO:0010468,GO:0010556,GO:0010558,GO:0010605,GO:0010608,GO:0010629,GO:0016043,GO:0017148,GO:0019222,GO:0022607,GO:0031323,GO:0031324,GO:0031326,GO:0031327,GO:0032268,GO:0032269,GO:0034248,GO:…	S
Mj-13323	ROT60631.1	ribosomal protein S8 [Penaeus vannamei]	94.5	8e-131	372	GO:0000462,GO:0002164,GO:0002181,GO:0002376,GO:0002520,GO:0003674,GO:0003735,GO:0005198,GO:0005575,GO:0005622,GO:0005623,GO:0005737,GO:0005829,GO:0005840,GO:0006139,GO:0006364,GO:0006396,GO:0006412,GO:0006518,GO:0006725,GO:0006807,GO:0007275,GO:0008150,GO:0008152,GO:0009058,GO:0009059,GO:0009791,GO:0009987,GO:0010467,GO:0015935,GO:0016070,GO:0016072,GO:0019538,GO:0022613,GO:0022626,GO:0022627,GO:…	J
Mj-13325	XP_027214620.1	polyubiquitin 8-like isoform X2 [Penaeus vannamei]	58.33	3e-57	188	#N/A	O
Mj-13328	ROT78974.1	suppressor of profilin 2 [Penaeus vannamei]	98.12	0	764	GO:0000902,GO:0000904,GO:0001654,GO:0001700,GO:0001745,GO:0003674,GO:0003779,GO:0005198,GO:0005200,GO:0005488,GO:0005515,GO:0005575,GO:0005622,GO:0005623,GO:0005856,GO:0005885,GO:0006810,GO:0006886,GO:0006996,GO:0007010,GO:0007015,GO:0007049,GO:0007155,GO:0007275,GO:0007399,GO:0007409,GO:0007413,GO:0007423,GO:0008037,GO:0008038,GO:0008064,GO:0008092,GO:0008104,GO:0008150,GO:0008407,GO:0008593,GO:…	Z
Mj-13329	ROT70980.1	putative notchless protein-like 1 [Penaeus vannamei]	24.59	9e-18	89.4	GO:0000003,GO:0001667,GO:0001736,GO:0001738,GO:0002009,GO:0002064,GO:0002065,GO:0002066,GO:0002165,GO:0003006,GO:0003674,GO:0003779,GO:0005488,GO:0005515,GO:0005575,GO:0005622,GO:0005623,GO:0005737,GO:0005856,GO:0005884,GO:0005938,GO:0006928,GO:0006996,GO:0007010,GO:0007015,GO:0007164,GO:0007275,GO:0007276,GO:0007281,GO:0007292,GO:0007297,GO:0007298,GO:0007399,GO:0007444,GO:0007472,GO:0007476,GO:…	Z
Mj-13334	ABN04203.1	ribosomal protein L26 [Penaeus vannamei]	99.31	4e-101	293	GO:0002181,GO:0003674,GO:0003676,GO:0003723,GO:0003735,GO:0005198,GO:0005488,GO:0005575,GO:0005622,GO:0005623,GO:0005737,GO:0005829,GO:0005840,GO:0006412,GO:0006518,GO:0006807,GO:0008150,GO:0008152,GO:0009058,GO:0009059,GO:0009987,GO:0010467,GO:0015934,GO:0019538,GO:0022613,GO:0022625,GO:0022626,GO:0032991,GO:0034641,GO:0034645,GO:0042254,GO:0042273,GO:0043043,GO:0043170,GO:0043226,GO:0043228,GO:…	J
Mj-13336	AEE36481.1	TAR RNA-binding protein isoform 1 [Penaeus japonicus]	100	0	636	GO:0000003,GO:0003006,GO:0003674,GO:0003676,GO:0003723,GO:0003725,GO:0005488,GO:0005515,GO:0005575,GO:0005622,GO:0005623,GO:0005737,GO:0006139,GO:0006396,GO:0006725,GO:0006807,GO:0007275,GO:0007276,GO:0007281,GO:0007292,GO:0007399,GO:0007417,GO:0007549,GO:0008150,GO:0008152,GO:0008356,GO:0009047,GO:0009892,GO:0009987,GO:0010033,GO:0010467,GO:0010468,GO:0010586,GO:0010605,GO:0010608,GO:0010629,GO:…	KU
Mj-13339	QMX42369.1	cystatin-like protein [Penaeus vannamei]	82.11	2e-50	167	#N/A	#N/A
Mj-13348	#N/A	#N/A	#N/A	#N/A	#N/A	#N/A	#N/A
Mj-13349	ROT70331.1	hypothetical protein C7M84_011381 [Penaeus vannamei]	36.06	1e-14	72.8	#N/A	#N/A
Mj-13353	ROT76158.1	putative nucleolar protein 16 [Penaeus vannamei]	78.98	2e-94	283	GO:0005575,GO:0005622,GO:0005623,GO:0005634,GO:0005730,GO:0008150,GO:0022613,GO:0031974,GO:0031981,GO:0042254,GO:0042273,GO:0043226,GO:0043227,GO:0043228,GO:0043229,GO:0043231,GO:0043232,GO:0043233,GO:0044085,GO:0044422,GO:0044424,GO:0044428,GO:0044446,GO:0044464,GO:0070013,GO:0071840	S
Mj-13357	#N/A	#N/A	#N/A	#N/A	#N/A	#N/A	#N/A
Mj-13358	XP_027207114.1	C-terminal-binding protein-like isoform X1 [Penaeus vannamei]	99.04	0	850	GO:0000122,GO:0000228,GO:0000785,GO:0000790,GO:0001700,GO:0001709,GO:0003002,GO:0003674,GO:0003712,GO:0003713,GO:0003714,GO:0003824,GO:0005488,GO:0005515,GO:0005575,GO:0005622,GO:0005623,GO:0005634,GO:0005694,GO:0005737,GO:0005829,GO:0006325,GO:0006338,GO:0006355,GO:0006357,GO:0006996,GO:0007275,GO:0007389,GO:0007423,GO:0007444,GO:0008052,GO:0008134,GO:0008150,GO:0008152,GO:0009653,GO:0009790,GO:…	K
Mj-13362	AGZ89665.1	eukaryotic initiation factor 4A [Penaeus vannamei]	97.23	0	797	GO:0000003,GO:0000381,GO:0002164,GO:0002165,GO:0002168,GO:0003006,GO:0003674,GO:0003676,GO:0003723,GO:0003724,GO:0003743,GO:0003824,GO:0004004,GO:0004386,GO:0005488,GO:0005575,GO:0005622,GO:0005623,GO:0005634,GO:0005730,GO:0005737,GO:0005829,GO:0006139,GO:0006412,GO:0006413,GO:0006518,GO:0006725,GO:0006807,GO:0007275,GO:0007276,GO:0007277,GO:0007279,GO:0007281,GO:0007292,GO:0007349,GO:0007444,GO:…	A
Mj-13369	XP_027215343.1	uncharacterized protein LOC113808203 [Penaeus vannamei]	87.68	0	751	#N/A	#N/A
Mj-13375	XP_027213260.1	uncharacterized protein LOC113806335 [Penaeus vannamei]	85.02	5e-172	490	#N/A	S
Mj-13380	AAR92097.1	protease inhibitor [Penaeus japonicus]	98.75	9e-53	169	#N/A	#N/A
Mj-13381	XP_027226254.1	calcium/calmodulin-dependent protein kinase type 1-like isoform X1 [Penaeus vannamei]	97.6	0	645	GO:0003674,GO:0003824,GO:0004672,GO:0004674,GO:0004683,GO:0005488,GO:0005515,GO:0005516,GO:0005575,GO:0005622,GO:0005623,GO:0005737,GO:0005829,GO:0006464,GO:0006468,GO:0006793,GO:0006796,GO:0006807,GO:0007154,GO:0007165,GO:0008150,GO:0008152,GO:0009987,GO:0016301,GO:0016310,GO:0016740,GO:0016772,GO:0016773,GO:0018105,GO:0018107,GO:0018193,GO:0018209,GO:0018210,GO:0019538,GO:0023052,GO:0035556,GO:…	T
Mj-13382	ALL27930.1	phosphopyruvate hydratase [Penaeus japonicus]	99.54	0	897	GO:0008150,GO:0033500,GO:0042592,GO:0042593,GO:0048878,GO:0065007,GO:0065008	G
Mj-134	XP_027209107.1	transforming acidic coiled-coil-containing protein 3-like, partial [Penaeus vannamei]	80.29	0	1333	GO:0000226,GO:0003674,GO:0005488,GO:0005515,GO:0005575,GO:0005622,GO:0005623,GO:0005737,GO:0005856,GO:0006810,GO:0006996,GO:0007010,GO:0007017,GO:0007097,GO:0007275,GO:0007399,GO:0007417,GO:0007420,GO:0008150,GO:0008283,GO:0009987,GO:0015630,GO:0016043,GO:0019904,GO:0021537,GO:0021543,GO:0021846,GO:0021987,GO:0022008,GO:0022027,GO:0030154,GO:0030900,GO:0032501,GO:0032502,GO:0032886,GO:0043226,GO:…	S
Mj-13402	XP_027216241.1	uncharacterized protein LOC113808957 [Penaeus vannamei]	76.82	2e-152	439	GO:0002376,GO:0003674,GO:0005488,GO:0005515,GO:0005575,GO:0005576,GO:0006950,GO:0006952,GO:0006955,GO:0006959,GO:0007599,GO:0008150,GO:0009611,GO:0032501,GO:0042060,GO:0042381,GO:0042802,GO:0042803,GO:0045087,GO:0046983,GO:0050817,GO:0050878,GO:0050896,GO:0065007,GO:0065008	T
Mj-13403	XP_027218063.1	dnaJ homolog subfamily C member 3-like [Penaeus vannamei]	97.2	0	885	#N/A	O
Mj-13410	#N/A	#N/A	#N/A	#N/A	#N/A	#N/A	#N/A
Mj-13446	#N/A	#N/A	#N/A	#N/A	#N/A	#N/A	#N/A
Mj-13471	BAB85212.1	ATP lipid-binding protein like protein, partial [Penaeus japonicus]	100	1e-37	134	GO:0000276,GO:0003674,GO:0003824,GO:0005215,GO:0005575,GO:0005622,GO:0005623,GO:0005737,GO:0005739,GO:0005740,GO:0005743,GO:0005753,GO:0006139,GO:0006163,GO:0006164,GO:0006725,GO:0006753,GO:0006754,GO:0006793,GO:0006796,GO:0006807,GO:0006810,GO:0006811,GO:0006812,GO:0008150,GO:0008152,GO:0008324,GO:0009058,GO:0009117,GO:0009123,GO:0009124,GO:0009126,GO:0009127,GO:0009141,GO:0009142,GO:0009144,GO:…	C
Mj-13542	ROT76483.1	putative CDGSH iron-sulfur domain-containing protein 3, mitochondrial [Penaeus vannamei]	87.41	1e-82	249	#N/A	S
Mj-13553	#N/A	#N/A	#N/A	#N/A	#N/A	#N/A	#N/A
Mj-13603	#N/A	#N/A	#N/A	#N/A	#N/A	#N/A	#N/A
Mj-13632	XP_027225483.1	aminopeptidase N-like [Penaeus vannamei]	90.18	0	1846	GO:0003674,GO:0003824,GO:0004177,GO:0005488,GO:0005575,GO:0005622,GO:0005623,GO:0005737,GO:0006508,GO:0006518,GO:0006807,GO:0008150,GO:0008152,GO:0008233,GO:0008235,GO:0008237,GO:0008238,GO:0008270,GO:0009056,GO:0009987,GO:0016787,GO:0019538,GO:0033218,GO:0034641,GO:0042277,GO:0043167,GO:0043169,GO:0043170,GO:0043171,GO:0043603,GO:0044237,GO:0044238,GO:0044248,GO:0044424,GO:0044464,GO:0046872,GO:…	EO
Mj-13650	ROT75901.1	hypothetical protein C7M84_005546 [Penaeus vannamei]	34.44	2e-43	159	#N/A	#N/A
Mj-13668	#N/A	#N/A	#N/A	#N/A	#N/A	#N/A	#N/A
Mj-137	XP_027220273.1	neuron navigator 3-like [Penaeus vannamei]	97.58	0	2859	GO:0000902,GO:0000904,GO:0006950,GO:0006952,GO:0006996,GO:0007010,GO:0007015,GO:0007275,GO:0007399,GO:0007409,GO:0008150,GO:0009605,GO:0009607,GO:0009617,GO:0009653,GO:0009987,GO:0016043,GO:0022008,GO:0030029,GO:0030030,GO:0030036,GO:0030154,GO:0030182,GO:0031175,GO:0032501,GO:0032502,GO:0032989,GO:0032990,GO:0042742,GO:0043207,GO:0048468,GO:0048666,GO:0048667,GO:0048699,GO:0048731,GO:0048812,GO:…	O
Mj-13751	#N/A	#N/A	#N/A	#N/A	#N/A	#N/A	#N/A
Mj-1376	XP_027216919.1	polyadenylate-binding protein 4-like [Penaeus vannamei]	99.03	0	1075	#N/A	A
Mj-13776	XP_027221041.1	uncharacterized protein LOC113813269 [Penaeus vannamei]	70.92	8e-144	421	GO:0003674,GO:0003824,GO:0005575,GO:0005622,GO:0005623,GO:0005634,GO:0005730,GO:0005813,GO:0005815,GO:0005856,GO:0006139,GO:0006464,GO:0006725,GO:0006807,GO:0006950,GO:0006974,GO:0007275,GO:0007399,GO:0007417,GO:0007420,GO:0008150,GO:0008152,GO:0009116,GO:0009987,GO:0015630,GO:0016787,GO:0016798,GO:0019213,GO:0019538,GO:0031974,GO:0031981,GO:0032501,GO:0032502,GO:0033554,GO:0034641,GO:0036211,GO:…	BK
Mj-138	XP_027228983.1	heterogeneous nuclear ribonucleoprotein L-like isoform X1 [Penaeus vannamei]	99.61	0	871	GO:0000902,GO:0000904,GO:0003674,GO:0003676,GO:0003723,GO:0003729,GO:0005488,GO:0006928,GO:0006935,GO:0007275,GO:0007399,GO:0007409,GO:0007411,GO:0007568,GO:0007610,GO:0007631,GO:0008150,GO:0008340,GO:0008343,GO:0009605,GO:0009653,GO:0009987,GO:0010259,GO:0016043,GO:0022008,GO:0030030,GO:0030154,GO:0030182,GO:0030534,GO:0031175,GO:0032501,GO:0032502,GO:0032989,GO:0032990,GO:0040011,GO:0042221,GO:…	A
Mj-13815	XP_027217430.1	SH3 and F-BAR domain-containing protein DDB_G0274695-like [Penaeus vannamei]	81.27	0	630	GO:0001725,GO:0003674,GO:0003779,GO:0005488,GO:0005515,GO:0005575,GO:0005622,GO:0005623,GO:0005737,GO:0005826,GO:0005829,GO:0005856,GO:0005886,GO:0005938,GO:0007154,GO:0007155,GO:0007165,GO:0008092,GO:0008150,GO:0009987,GO:0015629,GO:0016020,GO:0019899,GO:0019902,GO:0019903,GO:0022610,GO:0023052,GO:0030863,GO:0030864,GO:0032153,GO:0032154,GO:0032155,GO:0032432,GO:0042641,GO:0042802,GO:0043226,GO:…	T
Mj-13817	ROT82765.1	C type lectin containing domain protein [Penaeus vannamei]	71.43	4e-152	449	GO:0002237,GO:0002376,GO:0003674,GO:0004888,GO:0005488,GO:0005537,GO:0005575,GO:0005622,GO:0005623,GO:0005737,GO:0005768,GO:0005886,GO:0005887,GO:0006810,GO:0006897,GO:0006898,GO:0006950,GO:0006952,GO:0006955,GO:0007154,GO:0007165,GO:0008150,GO:0009605,GO:0009607,GO:0009617,GO:0009986,GO:0009987,GO:0010008,GO:0010033,GO:0012505,GO:0016020,GO:0016021,GO:0016192,GO:0023052,GO:0030246,GO:0031090,GO:…	TV	phagocytosis-related
Mj-13818	XP_027216871.1	uncharacterized protein LOC113809459 [Penaeus vannamei]	48.5	1e-70	239	#N/A	#N/A
Mj-13820	ROT67091.1	putative rho GDP-dissociation inhibitor 2, partial [Penaeus vannamei]	93.24	2e-102	322	#N/A	T
Mj-13829	XP_027207461.1	innexin inx3-like [Penaeus vannamei]	88.89	0	723	#N/A	P
Mj-13832	AXY96617.1	mitochondrial uncoupling protein 5 [Penaeus vannamei]	98.34	0	618	GO:0003008,GO:0003674,GO:0005215,GO:0005575,GO:0005622,GO:0005623,GO:0005737,GO:0005739,GO:0005740,GO:0005743,GO:0006810,GO:0006839,GO:0007600,GO:0007605,GO:0008150,GO:0016020,GO:0016021,GO:0019222,GO:0019866,GO:0022857,GO:0031090,GO:0031224,GO:0031966,GO:0031967,GO:0031975,GO:0032501,GO:0043226,GO:0043227,GO:0043229,GO:0043231,GO:0044422,GO:0044424,GO:0044425,GO:0044429,GO:0044444,GO:0044446,GO:…	C
Mj-13834	XP_027230424.1	uncharacterized protein LOC113822101 [Penaeus vannamei]	99.24	3e-71	227	#N/A	#N/A
Mj-13835	AIF27797.1	cathepsin D [Penaeus japonicus]	100	0	688	GO:0000003,GO:0000323,GO:0003006,GO:0003674,GO:0003824,GO:0004175,GO:0004190,GO:0005575,GO:0005622,GO:0005623,GO:0005737,GO:0005764,GO:0005773,GO:0006508,GO:0006807,GO:0006915,GO:0006950,GO:0006952,GO:0007276,GO:0007281,GO:0007292,GO:0008150,GO:0008152,GO:0008219,GO:0008233,GO:0009056,GO:0009057,GO:0009605,GO:0009607,GO:0009617,GO:0009987,GO:0010623,GO:0012501,GO:0016787,GO:0019538,GO:0019953,GO:…	O
Mj-13867	XP_027207460.1	innexin inx2-like [Penaeus vannamei]	87.15	0	613	GO:0000003,GO:0002009,GO:0003006,GO:0003674,GO:0005215,GO:0005243,GO:0005575,GO:0005623,GO:0005886,GO:0005911,GO:0005921,GO:0006810,GO:0007154,GO:0007275,GO:0007276,GO:0007281,GO:0007283,GO:0007292,GO:0007293,GO:0007440,GO:0008150,GO:0008283,GO:0009653,GO:0009790,GO:0009888,GO:0009987,GO:0010496,GO:0015267,GO:0016020,GO:0016021,GO:0016324,GO:0016327,GO:0016331,GO:0019827,GO:0019953,GO:0022412,GO:…	P
Mj-13868	XP_027229439.1	GTPase HRas [Penaeus vannamei]	100	3e-123	362	GO:0000003,GO:0000082,GO:0000165,GO:0000278,GO:0000578,GO:0000902,GO:0000904,GO:0001558,GO:0001654,GO:0001655,GO:0001667,GO:0001700,GO:0001708,GO:0001709,GO:0001745,GO:0001751,GO:0001752,GO:0001754,GO:0001763,GO:0001932,GO:0001934,GO:0002009,GO:0002064,GO:0002065,GO:0002066,GO:0002164,GO:0002165,GO:0002168,GO:0002252,GO:0002376,GO:0002520,GO:0002682,GO:0002684,GO:0003002,GO:0003006,GO:0003674,GO:…	T
Mj-13872	XP_027228367.1	CCAAT/enhancer-binding protein-like [Penaeus vannamei]	96.61	5e-31	126	#N/A	#N/A
Mj-13876	XP_027229026.1	cleavage and polyadenylation specificity factor subunit 6-like [Penaeus vannamei]	100	2e-74	259	#N/A	#N/A
Mj-13878	XP_027211572.1	zinc finger protein 493-like [Penaeus vannamei]	99.16	0	1648	#N/A	#N/A
Mj-13880	ROT78594.1	clathrin light chain [Penaeus vannamei]	94.98	3e-150	445	GO:0003674,GO:0005198,GO:0005488,GO:0005515,GO:0005575,GO:0005622,GO:0005623,GO:0005737,GO:0005819,GO:0005856,GO:0005886,GO:0005905,GO:0005938,GO:0006810,GO:0006897,GO:0006898,GO:0008150,GO:0012505,GO:0012506,GO:0015630,GO:0016020,GO:0016192,GO:0030117,GO:0030118,GO:0030120,GO:0030125,GO:0030132,GO:0030135,GO:0030136,GO:0030276,GO:0030659,GO:0030662,GO:0030665,GO:0031090,GO:0031410,GO:0031982,GO:…	U
Mj-13884	#N/A	#N/A	#N/A	#N/A	#N/A	#N/A	#N/A
Mj-13885	XP_027237663.1	calmodulin isoform X2 [Penaeus vannamei]	100	4e-94	297	GO:0000226,GO:0000902,GO:0000904,GO:0000922,GO:0001654,GO:0001745,GO:0001751,GO:0001754,GO:0002165,GO:0003008,GO:0003674,GO:0005488,GO:0005509,GO:0005515,GO:0005575,GO:0005622,GO:0005623,GO:0005737,GO:0005813,GO:0005814,GO:0005815,GO:0005819,GO:0005856,GO:0006464,GO:0006468,GO:0006793,GO:0006796,GO:0006807,GO:0006928,GO:0006935,GO:0006996,GO:0007010,GO:0007017,GO:0007049,GO:0007098,GO:0007099,GO:…	T
Mj-13888	ROT61616.1	ribosomal protein rpl6 [Penaeus vannamei]	95.83	3e-146	431	GO:0003674,GO:0005488,GO:0005515,GO:0007275,GO:0007568,GO:0008150,GO:0008340,GO:0010259,GO:0032501,GO:0032502,GO:0048856	J
Mj-13889	XP_027206441.1	leukocyte elastase inhibitor-like [Penaeus vannamei]	79.08	0	555	GO:0002009,GO:0002165,GO:0003674,GO:0004857,GO:0004866,GO:0004867,GO:0005575,GO:0005576,GO:0005615,GO:0007275,GO:0007444,GO:0007472,GO:0007476,GO:0007552,GO:0007560,GO:0008150,GO:0008592,GO:0009605,GO:0009607,GO:0009620,GO:0009653,GO:0009791,GO:0009886,GO:0009887,GO:0009888,GO:0009892,GO:0009966,GO:0009968,GO:0010466,GO:0010605,GO:0010646,GO:0010648,GO:0010951,GO:0019222,GO:0023051,GO:0023057,GO:…	V
Mj-13898	ROT66907.1	hypothetical protein C7M84_015033 [Penaeus vannamei]	98.25	0	580	GO:0000209,GO:0003674,GO:0003824,GO:0004842,GO:0005488,GO:0005515,GO:0006464,GO:0006807,GO:0008092,GO:0008150,GO:0008152,GO:0008270,GO:0009987,GO:0016567,GO:0016740,GO:0017022,GO:0019538,GO:0019787,GO:0032446,GO:0036211,GO:0043167,GO:0043169,GO:0043170,GO:0043412,GO:0044237,GO:0044238,GO:0044260,GO:0044267,GO:0046872,GO:0046914,GO:0050789,GO:0050794,GO:0051445,GO:0051726,GO:0065007,GO:0070647,GO:…	O
Mj-13899	ROT68725.1	hypothetical protein C7M84_013126 [Penaeus vannamei]	88.46	4e-167	487	GO:0000003,GO:0000226,GO:0003006,GO:0005575,GO:0005622,GO:0005623,GO:0005634,GO:0005737,GO:0005813,GO:0005815,GO:0005819,GO:0005829,GO:0005856,GO:0005938,GO:0006996,GO:0007010,GO:0007017,GO:0007163,GO:0007275,GO:0007276,GO:0007281,GO:0007292,GO:0007308,GO:0007309,GO:0007389,GO:0008150,GO:0009798,GO:0009987,GO:0009994,GO:0015630,GO:0016043,GO:0019953,GO:0021700,GO:0022412,GO:0022414,GO:0030010,GO:…	O
Mj-13907	XP_027232069.1	eukaryotic translation initiation factor 3 subunit A-like, partial [Penaeus vannamei]	94.88	0	1637	GO:0001732,GO:0002181,GO:0002183,GO:0002188,GO:0003674,GO:0003676,GO:0003723,GO:0003729,GO:0003743,GO:0005488,GO:0005575,GO:0005622,GO:0005623,GO:0005737,GO:0005829,GO:0005852,GO:0006412,GO:0006413,GO:0006417,GO:0006446,GO:0006518,GO:0006807,GO:0008135,GO:0008150,GO:0008152,GO:0009058,GO:0009059,GO:0009889,GO:0009987,GO:0010467,GO:0010468,GO:0010556,GO:0010608,GO:0016043,GO:0019222,GO:0019538,GO:…	J
Mj-13912	ACT65737.1	Rab7 [Penaeus vannamei]	100	4e-144	429	GO:0000003,GO:0000323,GO:0001555,GO:0001667,GO:0001845,GO:0002064,GO:0002065,GO:0002066,GO:0003002,GO:0003006,GO:0003674,GO:0003824,GO:0003924,GO:0005488,GO:0005575,GO:0005622,GO:0005623,GO:0005737,GO:0005764,GO:0005768,GO:0005770,GO:0005773,GO:0005938,GO:0006403,GO:0006810,GO:0006887,GO:0006897,GO:0006898,GO:0006909,GO:0006928,GO:0006996,GO:0007028,GO:0007033,GO:0007034,GO:0007040,GO:0007041,GO:…	U	phagocytosis-related
Mj-13947	XP_027231299.1	TATA element modulatory factor-like isoform X2 [Penaeus vannamei]	92.59	0	2148	GO:0003674,GO:0005488,GO:0005515,GO:0005575,GO:0005622,GO:0005623,GO:0005737,GO:0005794,GO:0012505,GO:0017016,GO:0017137,GO:0019899,GO:0031267,GO:0043226,GO:0043227,GO:0043229,GO:0043231,GO:0044424,GO:0044444,GO:0044464,GO:0051020	K
Mj-13965	ROT74161.1	putative metalloendopeptidase OMA1 [Penaeus vannamei]	47.46	5e-102	320	#N/A	O
Mj-1403	ROT68058.1	phosphoserine phosphatase [Penaeus vannamei]	94.07	3e-171	503	GO:0000003,GO:0000287,GO:0000902,GO:0000904,GO:0003674,GO:0003824,GO:0004647,GO:0005488,GO:0005509,GO:0005515,GO:0005575,GO:0005622,GO:0005623,GO:0005737,GO:0005829,GO:0006082,GO:0006520,GO:0006563,GO:0006564,GO:0006793,GO:0006796,GO:0006807,GO:0006928,GO:0006935,GO:0007275,GO:0007399,GO:0007409,GO:0007411,GO:0007422,GO:0007610,GO:0007617,GO:0007618,GO:0007619,GO:0008049,GO:0008150,GO:0008152,GO:…	E
Mj-1407	XP_027229527.1	nucleolin-like [Penaeus vannamei]	71.14	6e-42	155	#N/A	#N/A
Mj-14071	XP_027226178.1	60S ribosomal protein L30-like [Penaeus vannamei]	97.39	1e-76	231	GO:0002181,GO:0003674,GO:0003676,GO:0003723,GO:0003735,GO:0005198,GO:0005488,GO:0005575,GO:0005622,GO:0005623,GO:0005737,GO:0005829,GO:0005840,GO:0006412,GO:0006518,GO:0006807,GO:0007275,GO:0007399,GO:0007422,GO:0008150,GO:0008152,GO:0009058,GO:0009059,GO:0009987,GO:0010467,GO:0015934,GO:0019538,GO:0022625,GO:0022626,GO:0032501,GO:0032502,GO:0032991,GO:0034641,GO:0034645,GO:0040007,GO:0043043,GO:…	J
Mj-14139	XP_027229790.1	amyloid-beta-like protein isoform X1 [Penaeus vannamei]	97.84	0	1088	GO:0000902,GO:0003008,GO:0003674,GO:0005488,GO:0005515,GO:0005575,GO:0005576,GO:0005623,GO:0005886,GO:0006950,GO:0007275,GO:0007399,GO:0007417,GO:0007420,GO:0007422,GO:0007610,GO:0007611,GO:0007613,GO:0007614,GO:0007616,GO:0008150,GO:0009611,GO:0009628,GO:0009653,GO:0009987,GO:0010941,GO:0016020,GO:0016043,GO:0016319,GO:0022008,GO:0030030,GO:0030154,GO:0030182,GO:0031175,GO:0032501,GO:0032502,GO:…	S
Mj-14166	ROT78327.1	Gephyrin [Penaeus vannamei]	90.96	0	1151	GO:0003674,GO:0003824,GO:0005575,GO:0005622,GO:0005623,GO:0005737,GO:0006139,GO:0006163,GO:0006464,GO:0006725,GO:0006732,GO:0006753,GO:0006777,GO:0006793,GO:0006796,GO:0006807,GO:0008150,GO:0008152,GO:0009058,GO:0009108,GO:0009116,GO:0009117,GO:0009119,GO:0009141,GO:0009144,GO:0009150,GO:0009199,GO:0009205,GO:0009259,GO:0009987,GO:0016740,GO:0016772,GO:0016779,GO:0018130,GO:0018315,GO:0019538,GO:…	H
Mj-142	XP_027232241.1	NFX1-type zinc finger-containing protein 1-like [Penaeus vannamei]	76.42	0	3012	#N/A	L
Mj-1421	ROT78058.1	hypothetical protein C7M84_003241 [Penaeus vannamei]	94.92	3e-109	340	GO:0001558,GO:0005575,GO:0005622,GO:0005623,GO:0005634,GO:0008150,GO:0040008,GO:0043226,GO:0043227,GO:0043229,GO:0043231,GO:0044424,GO:0044464,GO:0050789,GO:0050794,GO:0051128,GO:0065007	S
Mj-14217	XP_027212927.1	uncharacterized protein LOC113806028 isoform X4 [Penaeus vannamei]	97.05	5e-137	439	#N/A	#N/A
Mj-14230	ROT63023.1	ubiquitin/ribosomal S30 fusion protein [Penaeus vannamei]	98.47	7e-76	231	GO:0000184,GO:0000956,GO:0002181,GO:0002227,GO:0002251,GO:0002376,GO:0002385,GO:0003674,GO:0003676,GO:0003723,GO:0003735,GO:0005198,GO:0005488,GO:0005575,GO:0005576,GO:0005615,GO:0005622,GO:0005623,GO:0005634,GO:0005654,GO:0005737,GO:0005829,GO:0005840,GO:0006139,GO:0006401,GO:0006402,GO:0006412,GO:0006413,GO:0006518,GO:0006605,GO:0006612,GO:0006613,GO:0006614,GO:0006725,GO:0006807,GO:0006810,GO:…	J
Mj-14275	XP_027215548.1	fructose-bisphosphate aldolase-like isoform X1 [Penaeus vannamei]	97.55	0	751	GO:0003674,GO:0003824,GO:0004332,GO:0005575,GO:0005622,GO:0005623,GO:0005737,GO:0005975,GO:0006082,GO:0006090,GO:0006091,GO:0006096,GO:0006139,GO:0006163,GO:0006164,GO:0006165,GO:0006725,GO:0006732,GO:0006733,GO:0006753,GO:0006754,GO:0006757,GO:0006793,GO:0006796,GO:0006807,GO:0007498,GO:0008150,GO:0008152,GO:0009056,GO:0009058,GO:0009108,GO:0009117,GO:0009123,GO:0009124,GO:0009126,GO:0009127,GO:…	G
Mj-1428	ROT69848.1	variable lymphocyte receptor A [Penaeus vannamei]	50.1	8e-152	461	#N/A	#N/A
Mj-14285	XP_027220517.1	uncharacterized protein LOC113812801 [Penaeus vannamei]	97.64	0	1135	GO:0003674,GO:0003824,GO:0005575,GO:0005622,GO:0005623,GO:0006491,GO:0006807,GO:0008150,GO:0008152,GO:0008194,GO:0008378,GO:0009100,GO:0009987,GO:0016740,GO:0016757,GO:0016758,GO:0019538,GO:0035250,GO:0043170,GO:0043226,GO:0043229,GO:0044237,GO:0044238,GO:0044260,GO:0044424,GO:0044464,GO:0071704,GO:1901135,GO:1901564	S
Mj-14297	ROT66292.1	60s ribosomal protein l27a [Penaeus vannamei]	93.88	5e-82	244	GO:0002181,GO:0003674,GO:0003676,GO:0003723,GO:0003735,GO:0005198,GO:0005488,GO:0005575,GO:0005622,GO:0005623,GO:0005737,GO:0005829,GO:0005840,GO:0006412,GO:0006518,GO:0006807,GO:0008150,GO:0008152,GO:0009058,GO:0009059,GO:0009987,GO:0010467,GO:0015934,GO:0019538,GO:0022625,GO:0022626,GO:0032991,GO:0034641,GO:0034645,GO:0043043,GO:0043170,GO:0043226,GO:0043228,GO:0043229,GO:0043232,GO:0043603,GO:…	J
Mj-14302	ROT78778.1	hypothetical protein C7M84_002516 [Penaeus vannamei]	35.53	6e-12	65.1	#N/A	#N/A
Mj-14306	XP_027224414.1	matrix metalloproteinase-2-like [Penaeus vannamei]	74.53	2e-108	355	#N/A	O
Mj-14318	ROT80897.1	S10e ribosomal protein [Penaeus vannamei]	98.71	2e-109	314	GO:0000028,GO:0002181,GO:0003674,GO:0003676,GO:0003723,GO:0003735,GO:0005198,GO:0005488,GO:0005575,GO:0005622,GO:0005623,GO:0005737,GO:0005829,GO:0005840,GO:0006412,GO:0006518,GO:0006807,GO:0006996,GO:0008150,GO:0008152,GO:0009058,GO:0009059,GO:0009987,GO:0010467,GO:0015935,GO:0016043,GO:0019538,GO:0022607,GO:0022613,GO:0022618,GO:0022626,GO:0022627,GO:0032991,GO:0034622,GO:0034641,GO:0034645,GO:…	J
Mj-14319	ROT63010.1	putative 40S ribosomal protein S3-like isoform X1 [Penaeus vannamei]	98.73	3e-173	484	GO:0000702,GO:0002181,GO:0003674,GO:0003676,GO:0003677,GO:0003684,GO:0003735,GO:0003824,GO:0003906,GO:0005198,GO:0005488,GO:0005575,GO:0005622,GO:0005623,GO:0005634,GO:0005737,GO:0005829,GO:0005840,GO:0006139,GO:0006259,GO:0006281,GO:0006412,GO:0006518,GO:0006725,GO:0006807,GO:0006950,GO:0006974,GO:0008150,GO:0008152,GO:0008534,GO:0009058,GO:0009059,GO:0009987,GO:0010467,GO:0010941,GO:0015935,GO:…	J
Mj-14320	#N/A	#N/A	#N/A	#N/A	#N/A	#N/A	#N/A
Mj-14327	ROT65997.1	hypothetical protein C7M84_016004 [Penaeus vannamei]	55.07	1e-46	172	#N/A	#N/A
Mj-1437	ROT68465.1	Tubulin beta-1 chain [Penaeus vannamei]	99.53	0	859	#N/A	Z
Mj-14386	ROT81842.1	60S ribosomal protein L27 [Penaeus vannamei]	97.08	3e-92	272	GO:0000184,GO:0000956,GO:0002181,GO:0002262,GO:0002376,GO:0002520,GO:0003674,GO:0003735,GO:0005198,GO:0005575,GO:0005622,GO:0005623,GO:0005737,GO:0005783,GO:0005789,GO:0005791,GO:0005829,GO:0005840,GO:0006139,GO:0006364,GO:0006396,GO:0006401,GO:0006402,GO:0006412,GO:0006413,GO:0006518,GO:0006605,GO:0006612,GO:0006613,GO:0006614,GO:0006725,GO:0006807,GO:0006810,GO:0006886,GO:0007275,GO:0008104,GO:…	J
Mj-14395	XP_027231701.1	nuclear receptor coactivator 6-like [Penaeus vannamei]	98.03	0	956	GO:0003674,GO:0003682,GO:0005488,GO:0005575,GO:0005622,GO:0005623,GO:0005634,GO:0005694,GO:0010369,GO:0043226,GO:0043227,GO:0043228,GO:0043229,GO:0043231,GO:0043232,GO:0044422,GO:0044424,GO:0044427,GO:0044446,GO:0044464,GO:0098687	S
Mj-14435	ROT63767.1	hypothetical protein C7M84_018329 [Penaeus vannamei]	50.77	2e-26	83.2	#N/A	#N/A
Mj-14439	XP_027230456.1	LOW QUALITY PROTEIN: bestrophin-3-like [Penaeus vannamei]	96.58	0	647	#N/A	P
Mj-14455	XP_027208273.1	hydroxymethylglutaryl-CoA lyase, mitochondrial-like [Penaeus vannamei]	97.92	0	685	GO:0003674,GO:0003824,GO:0004419,GO:0005575,GO:0005622,GO:0005623,GO:0005737,GO:0005739,GO:0005759,GO:0005777,GO:0006082,GO:0006520,GO:0006551,GO:0006807,GO:0008150,GO:0008152,GO:0009081,GO:0009987,GO:0016829,GO:0016830,GO:0016833,GO:0019752,GO:0031974,GO:0042579,GO:0043226,GO:0043227,GO:0043229,GO:0043231,GO:0043233,GO:0043436,GO:0044237,GO:0044238,GO:0044281,GO:0044422,GO:0044424,GO:0044429,GO:…	CE
Mj-14525	ROT73075.1	putative RNA-binding protein 15 [Penaeus vannamei]	99.54	7e-144	435	GO:0000375,GO:0000377,GO:0000381,GO:0000398,GO:0001510,GO:0001654,GO:0003002,GO:0003674,GO:0003676,GO:0003723,GO:0003729,GO:0005488,GO:0005575,GO:0005622,GO:0005623,GO:0005634,GO:0006139,GO:0006396,GO:0006397,GO:0006725,GO:0006807,GO:0007275,GO:0007389,GO:0007423,GO:0007444,GO:0007447,GO:0008150,GO:0008152,GO:0008380,GO:0009451,GO:0009888,GO:0009893,GO:0009966,GO:0009967,GO:0009987,GO:0010467,GO:…	A
Mj-146	XP_027228236.1	ubiquitin carboxyl-terminal hydrolase 7-like [Penaeus vannamei]	99.82	0	2212	GO:0000785,GO:0003674,GO:0003824,GO:0004843,GO:0005575,GO:0005622,GO:0005623,GO:0005634,GO:0005694,GO:0005700,GO:0006325,GO:0006342,GO:0006355,GO:0006464,GO:0006508,GO:0006807,GO:0006996,GO:0008150,GO:0008152,GO:0008233,GO:0008234,GO:0009889,GO:0009890,GO:0009892,GO:0009987,GO:0010468,GO:0010556,GO:0010558,GO:0010605,GO:0010629,GO:0016043,GO:0016458,GO:0016569,GO:0016570,GO:0016578,GO:0016579,GO:…	O
Mj-14621	XP_027221538.1	unc-112-related protein-like isoform X2 [Penaeus vannamei]	99.42	0	1409	GO:0003674,GO:0005488,GO:0005515,GO:0005575,GO:0005622,GO:0005623,GO:0005737,GO:0006950,GO:0006952,GO:0007155,GO:0007160,GO:0007275,GO:0007507,GO:0008150,GO:0009605,GO:0009607,GO:0009617,GO:0009888,GO:0014706,GO:0022610,GO:0031589,GO:0032501,GO:0032502,GO:0042742,GO:0043207,GO:0044424,GO:0044464,GO:0048513,GO:0048731,GO:0048738,GO:0048856,GO:0050829,GO:0050839,GO:0050896,GO:0051704,GO:0051707,GO:…	D
Mj-14622	XP_027216804.1	ras-related protein Rap-1b-like isoform X1 [Penaeus vannamei]	100	6e-121	356	GO:0000003,GO:0000902,GO:0000904,GO:0001654,GO:0001700,GO:0001736,GO:0001738,GO:0001745,GO:0002009,GO:0002064,GO:0002065,GO:0002066,GO:0002376,GO:0002520,GO:0003006,GO:0003674,GO:0003824,GO:0003924,GO:0005488,GO:0005515,GO:0005575,GO:0005623,GO:0006928,GO:0006929,GO:0006930,GO:0007154,GO:0007163,GO:0007164,GO:0007165,GO:0007264,GO:0007265,GO:0007275,GO:0007276,GO:0007281,GO:0007292,GO:0007391,GO:…	S
Mj-14649	XP_027226560.1	LOW QUALITY PROTEIN: 40S ribosomal protein S2-like [Penaeus vannamei]	99.58	1e-160	454	GO:0002181,GO:0003674,GO:0003735,GO:0005198,GO:0005575,GO:0005622,GO:0005623,GO:0005634,GO:0005730,GO:0005737,GO:0005829,GO:0005840,GO:0006412,GO:0006518,GO:0006807,GO:0008150,GO:0008152,GO:0009058,GO:0009059,GO:0009987,GO:0010467,GO:0015935,GO:0019538,GO:0022626,GO:0022627,GO:0031974,GO:0031981,GO:0032991,GO:0034641,GO:0034645,GO:0043043,GO:0043170,GO:0043226,GO:0043227,GO:0043228,GO:0043229,GO:…	J
Mj-14653	XP_027227621.1	LOW QUALITY PROTEIN: receptor-type guanylate cyclase Gyc76C-like [Penaeus vannamei]	90.38	0	2201	GO:0000902,GO:0000904,GO:0001653,GO:0001763,GO:0002009,GO:0002164,GO:0003674,GO:0003824,GO:0004383,GO:0005102,GO:0005488,GO:0005515,GO:0005575,GO:0005623,GO:0005886,GO:0005887,GO:0006139,GO:0006163,GO:0006164,GO:0006182,GO:0006355,GO:0006357,GO:0006725,GO:0006753,GO:0006793,GO:0006796,GO:0006807,GO:0006928,GO:0006935,GO:0006950,GO:0006970,GO:0007154,GO:0007165,GO:0007275,GO:0007399,GO:0007409,GO:…	T
Mj-14657	XP_027224750.1	serine/threonine-protein kinase PAK 2-like [Penaeus vannamei]	98.43	4e-165	489	GO:0000768,GO:0001726,GO:0001932,GO:0001934,GO:0003674,GO:0003824,GO:0004672,GO:0004674,GO:0005488,GO:0005515,GO:0005575,GO:0005622,GO:0005623,GO:0005737,GO:0006464,GO:0006468,GO:0006793,GO:0006796,GO:0006807,GO:0006928,GO:0006949,GO:0006950,GO:0006996,GO:0007010,GO:0007015,GO:0007154,GO:0007165,GO:0007264,GO:0007265,GO:0007266,GO:0007275,GO:0007346,GO:0007399,GO:0007520,GO:0008150,GO:0008152,GO:…	T
Mj-14661	XP_027225036.1	cAMP-responsive element-binding protein-like 2 [Penaeus vannamei]	93.55	1e-53	176	GO:0003674,GO:0003682,GO:0005488,GO:0005515,GO:0005575,GO:0005622,GO:0005623,GO:0005634,GO:0006355,GO:0006950,GO:0007154,GO:0007165,GO:0008150,GO:0009605,GO:0009889,GO:0009891,GO:0009893,GO:0009987,GO:0009991,GO:0010468,GO:0010556,GO:0010557,GO:0010604,GO:0010628,GO:0019219,GO:0019222,GO:0023052,GO:0031323,GO:0031325,GO:0031326,GO:0031328,GO:0031667,GO:0031929,GO:0035556,GO:0038202,GO:0042594,GO:…	K
Mj-1468	XP_027213797.1	protein disulfide-isomerase A4-like [Penaeus vannamei]	90.8	0	1260	GO:0003674,GO:0003756,GO:0003824,GO:0005575,GO:0005622,GO:0005623,GO:0005737,GO:0005783,GO:0006457,GO:0006950,GO:0008150,GO:0009987,GO:0012505,GO:0016853,GO:0016860,GO:0016864,GO:0033554,GO:0034976,GO:0043226,GO:0043227,GO:0043229,GO:0043231,GO:0044424,GO:0044444,GO:0044464,GO:0050896,GO:0051716,GO:0140096	O
Mj-14729	XP_027221544.1	ubiquitin-conjugating enzyme E2 R2-like [Penaeus vannamei]	100	6e-145	427	GO:0000209,GO:0003674,GO:0003824,GO:0004842,GO:0005488,GO:0005515,GO:0005575,GO:0005622,GO:0005623,GO:0005737,GO:0006464,GO:0006508,GO:0006511,GO:0006807,GO:0008150,GO:0008152,GO:0009056,GO:0009057,GO:0009987,GO:0010498,GO:0016567,GO:0016740,GO:0019538,GO:0019787,GO:0019899,GO:0019941,GO:0030163,GO:0031625,GO:0032446,GO:0036211,GO:0043161,GO:0043170,GO:0043412,GO:0043632,GO:0044237,GO:0044238,GO:…	O
Mj-14740	#N/A	#N/A	#N/A	#N/A	#N/A	#N/A	#N/A
Mj-1477	XP_037780823.1	death-associated protein 1-like [Penaeus monodon]	93.14	5e-57	193	GO:0003674,GO:0005488,GO:0005515,GO:0006355,GO:0006915,GO:0006950,GO:0007154,GO:0007165,GO:0008150,GO:0008219,GO:0009267,GO:0009605,GO:0009889,GO:0009890,GO:0009892,GO:0009894,GO:0009895,GO:0009987,GO:0009991,GO:0010468,GO:0010506,GO:0010507,GO:0010556,GO:0010558,GO:0010605,GO:0010629,GO:0012501,GO:0019219,GO:0019222,GO:0019904,GO:0023052,GO:0031323,GO:0031324,GO:0031326,GO:0031327,GO:0031329,GO:…	S
Mj-14778	ROT83878.1	ribosomal protein L12 [Penaeus vannamei]	98.79	2e-114	330	GO:0000027,GO:0002181,GO:0003674,GO:0003676,GO:0003723,GO:0003735,GO:0005198,GO:0005488,GO:0005575,GO:0005622,GO:0005623,GO:0005737,GO:0005829,GO:0005840,GO:0006412,GO:0006518,GO:0006807,GO:0006996,GO:0008150,GO:0008152,GO:0009058,GO:0009059,GO:0009987,GO:0010467,GO:0015934,GO:0016043,GO:0019538,GO:0019843,GO:0022607,GO:0022613,GO:0022618,GO:0022625,GO:0022626,GO:0032991,GO:0034622,GO:0034641,GO:…	J
Mj-14784	XP_027213387.1	protein ELYS-like isoform X3 [Penaeus vannamei]	97.14	0	1867	GO:0003674,GO:0003676,GO:0003677,GO:0003682,GO:0005488,GO:0005575,GO:0005622,GO:0005623,GO:0005634,GO:0006996,GO:0006997,GO:0006999,GO:0008150,GO:0009987,GO:0016043,GO:0022607,GO:0031490,GO:0031974,GO:0031981,GO:0034399,GO:0034622,GO:0043226,GO:0043227,GO:0043229,GO:0043231,GO:0043233,GO:0043933,GO:0044085,GO:0044422,GO:0044424,GO:0044428,GO:0044446,GO:0044464,GO:0046931,GO:0051292,GO:0065003,GO:…	S
Mj-14787	ROT60705.1	Ran protein [Penaeus vannamei]	99.07	7e-148	423	GO:0000003,GO:0000054,GO:0000132,GO:0000166,GO:0000212,GO:0000226,GO:0000278,GO:0001882,GO:0001883,GO:0003674,GO:0003824,GO:0003924,GO:0005488,GO:0005515,GO:0005525,GO:0005575,GO:0005622,GO:0005623,GO:0005634,GO:0005737,GO:0005819,GO:0005856,GO:0005874,GO:0005876,GO:0005938,GO:0006403,GO:0006405,GO:0006606,GO:0006611,GO:0006810,GO:0006886,GO:0006913,GO:0006996,GO:0007010,GO:0007017,GO:0007049,GO:…	U	phagocytosis-related
Mj-14814	XP_027238334.1	elongation factor 1-gamma-like [Penaeus vannamei]	97.42	0	783	GO:0003674,GO:0003676,GO:0003723,GO:0003746,GO:0003824,GO:0004364,GO:0005488,GO:0005575,GO:0005622,GO:0005623,GO:0005634,GO:0005737,GO:0005853,GO:0006412,GO:0006414,GO:0006518,GO:0006575,GO:0006749,GO:0006790,GO:0006807,GO:0008135,GO:0008150,GO:0008152,GO:0009058,GO:0009059,GO:0009987,GO:0010467,GO:0016740,GO:0016765,GO:0019538,GO:0032991,GO:0034641,GO:0034645,GO:0043043,GO:0043170,GO:0043226,GO:…	J
Mj-14822	XP_027236780.1	Fanconi anemia group M protein-like, partial [Penaeus vannamei]	79.28	0	1689	GO:0000003,GO:0000018,GO:0000019,GO:0000280,GO:0000712,GO:0000724,GO:0000725,GO:0003674,GO:0003678,GO:0003682,GO:0003824,GO:0004003,GO:0004386,GO:0005488,GO:0005575,GO:0005622,GO:0005623,GO:0005634,GO:0005654,GO:0006139,GO:0006259,GO:0006260,GO:0006261,GO:0006281,GO:0006302,GO:0006310,GO:0006725,GO:0006807,GO:0006950,GO:0006974,GO:0006996,GO:0007049,GO:0007059,GO:0007127,GO:0007131,GO:0008026,GO:…	A
Mj-1484	XP_037780742.1	EF-hand domain-containing protein D2 homolog [Penaeus monodon]	98.55	3e-75	247	#N/A	#N/A
Mj-14846	XP_027211391.1	genetic suppressor element 1-like [Penaeus vannamei]	83.8	8e-65	229	#N/A	#N/A
Mj-14875	#N/A	#N/A	#N/A	#N/A	#N/A	#N/A	#N/A
Mj-14889	AGY46350.1	pellino [Penaeus vannamei]	100	0	856	GO:0002682,GO:0002683,GO:0002759,GO:0002831,GO:0002832,GO:0002920,GO:0002921,GO:0003674,GO:0003824,GO:0004842,GO:0005575,GO:0005622,GO:0005623,GO:0005737,GO:0005886,GO:0006464,GO:0006807,GO:0007154,GO:0007165,GO:0007166,GO:0008063,GO:0008150,GO:0008152,GO:0008348,GO:0008592,GO:0009893,GO:0009966,GO:0009968,GO:0009987,GO:0010604,GO:0010646,GO:0010648,GO:0016020,GO:0016567,GO:0016740,GO:0019207,GO:…	T	immune-related
Mj-14904	XP_027207020.1	zinc finger protein 37-like isoform X1 [Penaeus vannamei]	94.1	0	760	#N/A	#N/A
Mj-14937	AGJ94439.1	eukaryotic translation initiation factor 5A [Penaeus vannamei]	98.09	1e-103	320	GO:0000003,GO:0002119,GO:0002164,GO:0003006,GO:0003674,GO:0003676,GO:0003723,GO:0003746,GO:0005488,GO:0005515,GO:0005575,GO:0005622,GO:0005623,GO:0005634,GO:0005635,GO:0005642,GO:0005643,GO:0005737,GO:0005783,GO:0005789,GO:0005829,GO:0006403,GO:0006405,GO:0006406,GO:0006412,GO:0006414,GO:0006417,GO:0006448,GO:0006518,GO:0006611,GO:0006807,GO:0006810,GO:0006873,GO:0006874,GO:0006875,GO:0006886,GO:…	J
Mj-14950	#N/A	#N/A	#N/A	#N/A	#N/A	#N/A	#N/A
Mj-14951	XP_027229142.1	tropomyosin isoform X21 [Penaeus vannamei]	93.1	5e-09	59.7	#N/A	#N/A
Mj-14957	XP_027215913.1	protein mothers against dpp-like isoform X2 [Penaeus vannamei]	97.74	0	859	GO:0000003,GO:0000976,GO:0000977,GO:0000980,GO:0000981,GO:0001012,GO:0001067,GO:0001085,GO:0001102,GO:0001158,GO:0001654,GO:0001655,GO:0001700,GO:0001704,GO:0001706,GO:0001708,GO:0001711,GO:0001714,GO:0001745,GO:0002009,GO:0002064,GO:0002065,GO:0002066,GO:0002165,GO:0003002,GO:0003006,GO:0003156,GO:0003674,GO:0003676,GO:0003677,GO:0003690,GO:0003700,GO:0003705,GO:0003712,GO:0003713,GO:0005072,GO:…	KT
Mj-14976	ROT71268.1	Programmed cell death protein 4 [Penaeus vannamei]	96.96	0	786	GO:0000003,GO:0003006,GO:0007276,GO:0007281,GO:0007292,GO:0007293,GO:0008150,GO:0008283,GO:0009653,GO:0009987,GO:0019953,GO:0022412,GO:0022414,GO:0030154,GO:0030727,GO:0032501,GO:0032502,GO:0032504,GO:0044703,GO:0045595,GO:0045597,GO:0048134,GO:0048135,GO:0048468,GO:0048477,GO:0048518,GO:0048522,GO:0048609,GO:0048646,GO:0048856,GO:0048869,GO:0050789,GO:0050793,GO:0050794,GO:0051094,GO:0051704,GO:…	T
Mj-14993	ROT65666.1	putative elongation factor 1-beta [Penaeus vannamei]	94.98	2e-117	340	GO:0003674,GO:0003676,GO:0003723,GO:0003746,GO:0005488,GO:0005575,GO:0005622,GO:0005623,GO:0005737,GO:0005853,GO:0006412,GO:0006414,GO:0006518,GO:0006807,GO:0008135,GO:0008150,GO:0008152,GO:0009058,GO:0009059,GO:0009987,GO:0010467,GO:0019538,GO:0032991,GO:0034641,GO:0034645,GO:0043043,GO:0043170,GO:0043603,GO:0043604,GO:0044237,GO:0044238,GO:0044249,GO:0044260,GO:0044267,GO:0044271,GO:0044424,GO:…	J
Mj-15008	XP_027216449.1	sacsin-like [Penaeus vannamei]	72.37	0	5407	GO:0003674,GO:0005102,GO:0005488,GO:0005515,GO:0005575,GO:0005622,GO:0005623,GO:0005634,GO:0005737,GO:0005739,GO:0006457,GO:0008150,GO:0009987,GO:0030424,GO:0030425,GO:0030544,GO:0031072,GO:0036477,GO:0042995,GO:0043005,GO:0043226,GO:0043227,GO:0043229,GO:0043231,GO:0044087,GO:0044424,GO:0044444,GO:0044463,GO:0044464,GO:0044877,GO:0048519,GO:0048523,GO:0050750,GO:0050789,GO:0050794,GO:0051087,GO:…	S
Mj-15018	ROT78695.1	putative F-box only protein 18-like [Penaeus vannamei]	81.73	0	1506	GO:0000018,GO:0000151,GO:0000724,GO:0000725,GO:0000737,GO:0000785,GO:0001932,GO:0001934,GO:0003674,GO:0003676,GO:0003677,GO:0003678,GO:0003690,GO:0003697,GO:0003824,GO:0004386,GO:0005488,GO:0005575,GO:0005622,GO:0005623,GO:0005634,GO:0005694,GO:0006139,GO:0006259,GO:0006260,GO:0006261,GO:0006275,GO:0006281,GO:0006282,GO:0006302,GO:0006308,GO:0006310,GO:0006464,GO:0006725,GO:0006807,GO:0006950,GO:…	L
Mj-15019	#N/A	#N/A	#N/A	#N/A	#N/A	#N/A	#N/A
Mj-15020	ROT81270.1	hypothetical protein C7M84_025558 [Penaeus vannamei]	36.59	6e-13	69.7	#N/A	S
Mj-15024	ROT68364.1	putative UBA-like domain-containing protein 1 [Penaeus vannamei]	96.77	1e-33	128	#N/A	S
Mj-15036	#N/A	#N/A	#N/A	#N/A	#N/A	#N/A	#N/A
Mj-15047	BAH28836.1	elongation factor 1-alpha [Penaeus japonicus]	99.78	0	924	GO:0003674,GO:0003676,GO:0003723,GO:0003746,GO:0003824,GO:0003924,GO:0005488,GO:0005575,GO:0005622,GO:0005623,GO:0005737,GO:0005853,GO:0006412,GO:0006414,GO:0006518,GO:0006807,GO:0008135,GO:0008150,GO:0008152,GO:0009058,GO:0009059,GO:0009987,GO:0010467,GO:0016462,GO:0016787,GO:0016817,GO:0016818,GO:0017111,GO:0019538,GO:0032991,GO:0034641,GO:0034645,GO:0043043,GO:0043170,GO:0043603,GO:0043604,GO:…	J
Mj-15058	#N/A	#N/A	#N/A	#N/A	#N/A	#N/A	#N/A
Mj-1506	ROT65822.1	hypothetical protein C7M84_016190 [Penaeus vannamei]	94.2	0	887	GO:0000902,GO:0000904,GO:0003008,GO:0003674,GO:0004888,GO:0005488,GO:0005515,GO:0005575,GO:0005623,GO:0005886,GO:0005887,GO:0006928,GO:0006935,GO:0007154,GO:0007165,GO:0007166,GO:0007267,GO:0007275,GO:0007399,GO:0007409,GO:0007411,GO:0007416,GO:0007417,GO:0007420,GO:0007431,GO:0007435,GO:0007444,GO:0007482,GO:0007517,GO:0007610,GO:0007611,GO:0007612,GO:0007613,GO:0007635,GO:0008037,GO:0008038,GO:…	T
Mj-1512	XP_027207122.1	uncharacterized protein LOC113800539 [Penaeus vannamei]	94.03	0	1038	#N/A	L
Mj-15120	XP_027225342.1	uncharacterized protein LOC113817469 [Penaeus vannamei]	57.43	6e-79	253	#N/A	#N/A
Mj-1513	XP_027224908.1	MPN domain-containing protein-like [Penaeus vannamei]	95.26	0	960	#N/A	O
Mj-15154	XP_027210158.1	protein tyrosine phosphatase type IVA 2-like [Penaeus vannamei]	99.44	7e-118	373	GO:0003674,GO:0003824,GO:0004721,GO:0004725,GO:0005575,GO:0005622,GO:0005623,GO:0005634,GO:0005737,GO:0005886,GO:0006464,GO:0006470,GO:0006793,GO:0006796,GO:0006807,GO:0008138,GO:0008150,GO:0008152,GO:0009987,GO:0016020,GO:0016311,GO:0016787,GO:0016788,GO:0016791,GO:0019538,GO:0035335,GO:0036211,GO:0042578,GO:0043170,GO:0043226,GO:0043227,GO:0043229,GO:0043231,GO:0043412,GO:0044237,GO:0044238,GO:…	T
Mj-1523	#N/A	#N/A	#N/A	#N/A	#N/A	#N/A	#N/A
Mj-15286	XP_027233300.1	protein split ends-like, partial [Penaeus vannamei]	85.69	0	3402	#N/A	#N/A
Mj-15292	XP_027216449.1	sacsin-like [Penaeus vannamei]	72.45	0	5266	GO:0003674,GO:0005102,GO:0005488,GO:0005515,GO:0005575,GO:0005622,GO:0005623,GO:0005634,GO:0005737,GO:0005739,GO:0006457,GO:0008150,GO:0009987,GO:0030424,GO:0030425,GO:0030544,GO:0031072,GO:0036477,GO:0042995,GO:0043005,GO:0043226,GO:0043227,GO:0043229,GO:0043231,GO:0044087,GO:0044424,GO:0044444,GO:0044463,GO:0044464,GO:0044877,GO:0048519,GO:0048523,GO:0050750,GO:0050789,GO:0050794,GO:0051087,GO:…	O
Mj-15295	XP_027217940.1	LOW QUALITY PROTEIN: F-actin-monooxygenase MICAL2-like [Penaeus vannamei]	95.9	0	2061	#N/A	Z
Mj-15308	XP_027214456.1	calcium-activated potassium channel slowpoke-like [Penaeus vannamei]	91.14	0	1373	#N/A	P
Mj-15312	XP_027207289.1	ankyrin-1-like [Penaeus vannamei]	37.79	3e-58	218	GO:0001654,GO:0001745,GO:0001751,GO:0001754,GO:0002376,GO:0003674,GO:0005488,GO:0005515,GO:0005575,GO:0005622,GO:0005623,GO:0005737,GO:0006955,GO:0006959,GO:0006996,GO:0007005,GO:0007010,GO:0007154,GO:0007165,GO:0007166,GO:0007167,GO:0007169,GO:0007275,GO:0007399,GO:0007423,GO:0008150,GO:0009605,GO:0009607,GO:0009653,GO:0009887,GO:0009892,GO:0009894,GO:0009895,GO:0009987,GO:0010506,GO:0010507,GO:…	T
Mj-15313	ROT83402.1	putative mitogen-activated protein kinase kinase kinase kinase 5 isoform X4 [Penaeus vannamei]	99.39	0	1632	GO:0000165,GO:0000185,GO:0001932,GO:0001934,GO:0003674,GO:0003824,GO:0004672,GO:0004674,GO:0005575,GO:0005622,GO:0005623,GO:0005737,GO:0005829,GO:0006464,GO:0006468,GO:0006793,GO:0006796,GO:0006807,GO:0006915,GO:0006950,GO:0006996,GO:0007030,GO:0007154,GO:0007165,GO:0007254,GO:0007346,GO:0007610,GO:0008150,GO:0008152,GO:0008219,GO:0008349,GO:0008361,GO:0009636,GO:0009893,GO:0009966,GO:0009967,GO:…	T
Mj-15316	ROT63968.1	hypothetical protein C7M84_018102 [Penaeus vannamei]	94.17	2e-49	191	#N/A	#N/A
Mj-15320	XP_027221314.1	LOW QUALITY PROTEIN: dedicator of cytokinesis protein 2-like [Penaeus vannamei]	93.73	0	1565	GO:0000003,GO:0000768,GO:0000902,GO:0001655,GO:0001667,GO:0001700,GO:0001726,GO:0002009,GO:0002064,GO:0002065,GO:0002066,GO:0002164,GO:0003006,GO:0003674,GO:0005085,GO:0005088,GO:0005089,GO:0005488,GO:0005515,GO:0005575,GO:0005622,GO:0005623,GO:0005737,GO:0005886,GO:0006928,GO:0006949,GO:0006996,GO:0007010,GO:0007275,GO:0007276,GO:0007281,GO:0007292,GO:0007297,GO:0007298,GO:0007391,GO:0007399,GO:…	T
Mj-15346	XP_027219768.1	kalirin-like [Penaeus vannamei]	99.02	0	3277	GO:0000902,GO:0000904,GO:0002009,GO:0002165,GO:0003674,GO:0005085,GO:0005088,GO:0005089,GO:0005488,GO:0005515,GO:0005575,GO:0005622,GO:0005623,GO:0005886,GO:0006928,GO:0006935,GO:0006996,GO:0007010,GO:0007154,GO:0007275,GO:0007399,GO:0007409,GO:0007411,GO:0007412,GO:0007417,GO:0007420,GO:0007422,GO:0007444,GO:0007478,GO:0007480,GO:0007552,GO:0007560,GO:0008150,GO:0008582,GO:0009605,GO:0009653,GO:…	T
Mj-15356	APA16577.1	Dome [Penaeus japonicus]	100	0	2694	GO:0000003,GO:0001654,GO:0001667,GO:0001745,GO:0002064,GO:0002065,GO:0002066,GO:0002376,GO:0003002,GO:0003006,GO:0003008,GO:0003674,GO:0003779,GO:0004888,GO:0004896,GO:0005488,GO:0005515,GO:0005575,GO:0005622,GO:0005623,GO:0005737,GO:0005886,GO:0006928,GO:0006955,GO:0007154,GO:0007165,GO:0007166,GO:0007259,GO:0007275,GO:0007276,GO:0007281,GO:0007292,GO:0007297,GO:0007298,GO:0007350,GO:0007389,GO:…	T
Mj-15365	XP_027213964.1	myocyte-specific enhancer factor 2-like isoform X3 [Penaeus vannamei]	98.1	0	813	GO:0000003,GO:0000768,GO:0000976,GO:0000981,GO:0000982,GO:0001067,GO:0001077,GO:0001158,GO:0001205,GO:0001228,GO:0002064,GO:0002065,GO:0002066,GO:0002376,GO:0003006,GO:0003674,GO:0003676,GO:0003677,GO:0003690,GO:0003700,GO:0003705,GO:0005488,GO:0005575,GO:0005622,GO:0005623,GO:0005634,GO:0006139,GO:0006351,GO:0006355,GO:0006357,GO:0006366,GO:0006725,GO:0006807,GO:0006949,GO:0006955,GO:0006959,GO:…	K
Mj-15369	XP_027231064.1	serine/threonine-protein kinase Genghis Khan-like [Penaeus vannamei]	95.6	0	2936	GO:0003674,GO:0003824,GO:0004672,GO:0004674,GO:0005488,GO:0005515,GO:0005575,GO:0005623,GO:0006464,GO:0006468,GO:0006793,GO:0006796,GO:0006807,GO:0006996,GO:0007010,GO:0007015,GO:0007275,GO:0007399,GO:0008037,GO:0008038,GO:0008039,GO:0008064,GO:0008150,GO:0008152,GO:0008154,GO:0009987,GO:0016043,GO:0016301,GO:0016310,GO:0016740,GO:0016772,GO:0016773,GO:0019538,GO:0022008,GO:0030029,GO:0030036,GO:…	T
Mj-15370	XP_027212328.1	cingulin-like protein 1 isoform X3 [Penaeus vannamei]	86.67	0	1503	#N/A	#N/A
Mj-15381	XP_027209912.1	myocardin-related transcription factor B-like isoform X1 [Penaeus vannamei]	95.11	0	1300	GO:0000003,GO:0001666,GO:0001667,GO:0002009,GO:0002064,GO:0002065,GO:0002066,GO:0002165,GO:0003006,GO:0003674,GO:0003712,GO:0003713,GO:0005488,GO:0005515,GO:0005575,GO:0005622,GO:0005623,GO:0005634,GO:0005737,GO:0006355,GO:0006357,GO:0006928,GO:0006950,GO:0006996,GO:0007010,GO:0007275,GO:0007276,GO:0007281,GO:0007292,GO:0007297,GO:0007298,GO:0007424,GO:0007444,GO:0007472,GO:0007476,GO:0007552,GO:…	S
Mj-15390	XP_027221538.1	unc-112-related protein-like isoform X2 [Penaeus vannamei]	99.42	0	1409	GO:0000003,GO:0000226,GO:0000578,GO:0001709,GO:0002164,GO:0002165,GO:0002168,GO:0003002,GO:0003006,GO:0003674,GO:0003676,GO:0003723,GO:0003729,GO:0005488,GO:0006403,GO:0006417,GO:0006810,GO:0006996,GO:0007010,GO:0007017,GO:0007028,GO:0007097,GO:0007163,GO:0007275,GO:0007276,GO:0007281,GO:0007292,GO:0007293,GO:0007294,GO:0007308,GO:0007309,GO:0007310,GO:0007312,GO:0007314,GO:0007315,GO:0007316,GO:…	L
Mj-15392	ROT84477.1	putative cytoplasmic FMR1-interacting protein [Penaeus vannamei]	96.48	0	2838	GO:0000003,GO:0000902,GO:0000904,GO:0001654,GO:0001667,GO:0001745,GO:0002064,GO:0002065,GO:0002066,GO:0003006,GO:0003674,GO:0005488,GO:0005515,GO:0005575,GO:0005622,GO:0005623,GO:0005737,GO:0006928,GO:0006935,GO:0006996,GO:0007010,GO:0007155,GO:0007275,GO:0007276,GO:0007281,GO:0007292,GO:0007297,GO:0007399,GO:0007409,GO:0007411,GO:0007423,GO:0008150,GO:0008360,GO:0009605,GO:0009653,GO:0009887,GO:…	S
Mj-15410	AEC12821.1	lactate dehydrogenase [Penaeus vannamei]	97.46	1e-142	452	GO:0000768,GO:0006949,GO:0007520,GO:0007525,GO:0008150,GO:0009653,GO:0009987,GO:0014902,GO:0030154,GO:0032502,GO:0042692,GO:0048646,GO:0048856,GO:0048869,GO:0051146,GO:0061061	C
Mj-15421	XP_027236504.1	serine/threonine-protein kinase 10-like isoform X3 [Penaeus vannamei]	93.95	0	2222	GO:0000132,GO:0000226,GO:0000278,GO:0000281,GO:0000902,GO:0000910,GO:0001932,GO:0001934,GO:0003674,GO:0003824,GO:0004672,GO:0004674,GO:0005575,GO:0005622,GO:0005623,GO:0005737,GO:0005819,GO:0005856,GO:0005886,GO:0005938,GO:0006464,GO:0006468,GO:0006793,GO:0006796,GO:0006807,GO:0006950,GO:0006996,GO:0007010,GO:0007017,GO:0007049,GO:0007051,GO:0007052,GO:0007088,GO:0007091,GO:0007154,GO:0007163,GO:…	T
Mj-15431	XP_027226278.1	UV radiation resistance-associated gene protein-like [Penaeus vannamei]	86.27	0	1473	GO:0000003,GO:0000149,GO:0000323,GO:0002009,GO:0002165,GO:0003006,GO:0003674,GO:0005488,GO:0005515,GO:0005575,GO:0005622,GO:0005623,GO:0005737,GO:0005768,GO:0005773,GO:0006810,GO:0006906,GO:0006996,GO:0007275,GO:0007399,GO:0007444,GO:0007483,GO:0007484,GO:0007485,GO:0007548,GO:0007552,GO:0007560,GO:0008150,GO:0008285,GO:0008593,GO:0009653,GO:0009791,GO:0009886,GO:0009887,GO:0009888,GO:0009966,GO:…	S
Mj-15436	XP_027226469.1	rho GTPase-activating protein 21-like isoform X1 [Penaeus vannamei]	98.27	0	1168	GO:0002009,GO:0002165,GO:0003674,GO:0005096,GO:0007154,GO:0007165,GO:0007264,GO:0007265,GO:0007266,GO:0007275,GO:0007444,GO:0007478,GO:0007480,GO:0007552,GO:0007560,GO:0008047,GO:0008150,GO:0009653,GO:0009791,GO:0009886,GO:0009887,GO:0009888,GO:0009987,GO:0023052,GO:0030234,GO:0030695,GO:0032501,GO:0032502,GO:0035107,GO:0035114,GO:0035120,GO:0035218,GO:0035239,GO:0035295,GO:0035556,GO:0043085,GO:…	T
Mj-15438	ROT83579.1	Extracellular sulfatase SULF-1-like protein [Penaeus vannamei]	88.77	0	1614	GO:0000902,GO:0000904,GO:0003002,GO:0003674,GO:0003824,GO:0005575,GO:0005576,GO:0005615,GO:0006022,GO:0006082,GO:0006790,GO:0006807,GO:0006928,GO:0006935,GO:0007275,GO:0007389,GO:0007399,GO:0007409,GO:0007411,GO:0007444,GO:0007447,GO:0007450,GO:0008037,GO:0008038,GO:0008039,GO:0008045,GO:0008150,GO:0008152,GO:0008449,GO:0008484,GO:0008589,GO:0009605,GO:0009653,GO:0009888,GO:0009953,GO:0009966,GO:…	G
Mj-15444	XP_027218030.1	probable phosphorylase b kinase regulatory subunit beta [Penaeus vannamei]	91.44	0	2006	GO:0000003,GO:0000578,GO:0001700,GO:0003002,GO:0003006,GO:0003674,GO:0005215,GO:0005488,GO:0005515,GO:0005575,GO:0005622,GO:0005623,GO:0005737,GO:0005854,GO:0006403,GO:0006810,GO:0007028,GO:0007275,GO:0007276,GO:0007281,GO:0007292,GO:0007308,GO:0007309,GO:0007314,GO:0007315,GO:0007317,GO:0007318,GO:0007350,GO:0007351,GO:0007389,GO:0008104,GO:0008150,GO:0008298,GO:0008358,GO:0008565,GO:0008595,GO:…	K
Mj-15446	ROT62934.1	putative transcription factor BTF3-like 4, partial [Penaeus vannamei]	94.19	5e-78	254	GO:0000003,GO:0000578,GO:0001700,GO:0003002,GO:0003006,GO:0003674,GO:0005215,GO:0005488,GO:0005515,GO:0005575,GO:0005622,GO:0005623,GO:0005737,GO:0005854,GO:0006403,GO:0006810,GO:0007028,GO:0007275,GO:0007276,GO:0007281,GO:0007292,GO:0007308,GO:0007309,GO:0007314,GO:0007315,GO:0007317,GO:0007318,GO:0007350,GO:0007351,GO:0007389,GO:0008104,GO:0008150,GO:0008298,GO:0008358,GO:0008565,GO:0008595,GO:…	K
Mj-15448	XP_027236734.1	uncharacterized protein LOC113827978 isoform X1 [Penaeus vannamei]	68.29	2e-52	189	#N/A	#N/A
Mj-15450	XP_027237935.1	guanine nucleotide-releasing factor 2-like isoform X3 [Penaeus vannamei]	94.44	0	1807	GO:0003674,GO:0005085,GO:0005088,GO:0005488,GO:0005515,GO:0006996,GO:0007010,GO:0007154,GO:0007165,GO:0007264,GO:0007265,GO:0007275,GO:0007517,GO:0007525,GO:0008150,GO:0009653,GO:0009987,GO:0010927,GO:0016043,GO:0016203,GO:0017016,GO:0017034,GO:0019899,GO:0022607,GO:0023052,GO:0030029,GO:0030036,GO:0030154,GO:0030239,GO:0031032,GO:0031267,GO:0032501,GO:0032502,GO:0032989,GO:0035556,GO:0042692,GO:…	T
Mj-15451	XP_027239093.1	myosin heavy chain, non-muscle-like [Penaeus vannamei]	98.96	0	3326	GO:0000003,GO:0000278,GO:0000281,GO:0000910,GO:0001654,GO:0001655,GO:0001667,GO:0001700,GO:0001736,GO:0001738,GO:0001745,GO:0001894,GO:0002009,GO:0002064,GO:0002065,GO:0002066,GO:0002165,GO:0003002,GO:0003006,GO:0003008,GO:0003012,GO:0003674,GO:0003774,GO:0003824,GO:0005488,GO:0005515,GO:0005575,GO:0005622,GO:0005623,GO:0005737,GO:0005826,GO:0005856,GO:0005886,GO:0005911,GO:0005938,GO:0006928,GO:…	Z	phagocytosis-related
Mj-15464	XP_027237383.1	1-phosphatidylinositol 4,5-bisphosphate phosphodiesterase gamma-1-like [Penaeus vannamei]	95.68	0	2454	GO:0000003,GO:0001558,GO:0001667,GO:0002064,GO:0002065,GO:0002066,GO:0003006,GO:0006928,GO:0007276,GO:0007281,GO:0007292,GO:0007297,GO:0007298,GO:0008150,GO:0009719,GO:0009725,GO:0009888,GO:0009966,GO:0009968,GO:0009987,GO:0010033,GO:0010243,GO:0010631,GO:0010646,GO:0010648,GO:0016477,GO:0019953,GO:0022412,GO:0022414,GO:0023051,GO:0023057,GO:0030154,GO:0030307,GO:0030707,GO:0030855,GO:0032501,GO:…	I
Mj-15467	XP_027228429.1	polypyrimidine tract-binding protein 1-like isoform X5 [Penaeus vannamei]	100	0	1061	#N/A	A
Mj-15469	XP_027236571.1	cAMP-dependent protein kinase catalytic subunit 1 isoform X1 [Penaeus vannamei]	100	0	672	GO:0000003,GO:0000226,GO:0000578,GO:0001654,GO:0002009,GO:0002165,GO:0003002,GO:0003006,GO:0003008,GO:0003674,GO:0003824,GO:0004672,GO:0004674,GO:0005488,GO:0005515,GO:0005575,GO:0005622,GO:0005623,GO:0005737,GO:0005886,GO:0006355,GO:0006464,GO:0006468,GO:0006793,GO:0006796,GO:0006807,GO:0006950,GO:0006996,GO:0007010,GO:0007017,GO:0007154,GO:0007163,GO:0007165,GO:0007166,GO:0007224,GO:0007227,GO:…	T
Mj-15474	XP_027231684.1	MICAL-like protein 1 [Penaeus vannamei]	86.83	0	1498	GO:0003674,GO:0003779,GO:0005488,GO:0005515,GO:0008092	Z
Mj-15476	XP_027220273.1	neuron navigator 3-like [Penaeus vannamei]	97.08	0	2833	GO:0000902,GO:0000904,GO:0006950,GO:0006952,GO:0006996,GO:0007010,GO:0007015,GO:0007275,GO:0007399,GO:0007409,GO:0008150,GO:0009605,GO:0009607,GO:0009617,GO:0009653,GO:0009987,GO:0016043,GO:0022008,GO:0030029,GO:0030030,GO:0030036,GO:0030154,GO:0030182,GO:0031175,GO:0032501,GO:0032502,GO:0032989,GO:0032990,GO:0042742,GO:0043207,GO:0048468,GO:0048666,GO:0048667,GO:0048699,GO:0048731,GO:0048812,GO:…	O
Mj-15479	ROT70238.1	Dual 3',5'-cyclic-AMP and -GMP phosphodiesterase 11 [Penaeus vannamei]	93.61	0	1310	GO:0003674,GO:0003824,GO:0004112,GO:0004114,GO:0004115,GO:0006139,GO:0006163,GO:0006725,GO:0006753,GO:0006793,GO:0006796,GO:0006807,GO:0008081,GO:0008150,GO:0008152,GO:0009117,GO:0009150,GO:0009187,GO:0009259,GO:0009987,GO:0016787,GO:0016788,GO:0019637,GO:0019693,GO:0034641,GO:0042578,GO:0044237,GO:0044238,GO:0044281,GO:0046058,GO:0046068,GO:0046483,GO:0047555,GO:0055086,GO:0071704,GO:0072521,GO:…	T
Mj-15487	ROT78483.1	Sarcolemmal membrane-associated protein [Penaeus vannamei]	94.91	0	1465	GO:0003674,GO:0005488,GO:0005515,GO:0005575,GO:0008150,GO:0009966,GO:0009968,GO:0010646,GO:0010648,GO:0019899,GO:0019900,GO:0019901,GO:0023051,GO:0023057,GO:0032991,GO:0035330,GO:0035331,GO:0048519,GO:0048523,GO:0048583,GO:0048585,GO:0050789,GO:0050794,GO:0065007,GO:0090443,GO:1902531,GO:1902532	T
Mj-15492	XP_027209178.1	endoplasmic reticulum junction formation protein lunapark-A-like [Penaeus vannamei]	93.15	1e-170	536	#N/A	S
Mj-15502	XP_027234285.1	putative uncharacterized protein DDB_G0282133 [Penaeus vannamei]	88.49	0	1334	GO:0003674,GO:0005488,GO:0005515,GO:0005575,GO:0005622,GO:0005623,GO:0005634,GO:0032991,GO:0035145,GO:0043226,GO:0043227,GO:0043229,GO:0043231,GO:0044422,GO:0044424,GO:0044428,GO:0044446,GO:0044464	J
Mj-15508	XP_027230751.1	uncharacterized protein LOC113822415 [Penaeus vannamei]	91.64	0	1619	#N/A	#N/A
Mj-15516	XP_027224923.1	LOW QUALITY PROTEIN: otoferlin-like [Penaeus vannamei]	87.49	0	2131	#N/A	M
Mj-15526	ROT80539.1	Serine/threonine-protein kinase mig-15 [Penaeus vannamei]	99.79	0	863	GO:0000003,GO:0000165,GO:0000185,GO:0000902,GO:0000904,GO:0001700,GO:0001736,GO:0001738,GO:0001748,GO:0001932,GO:0001934,GO:0002009,GO:0002165,GO:0003006,GO:0003674,GO:0003824,GO:0004672,GO:0004674,GO:0005575,GO:0005622,GO:0005623,GO:0005737,GO:0005938,GO:0006464,GO:0006468,GO:0006793,GO:0006796,GO:0006807,GO:0006810,GO:0006928,GO:0006935,GO:0006950,GO:0007097,GO:0007154,GO:0007164,GO:0007165,GO:…	T
Mj-15527	ROT71102.1	phosphoinositide 3-kinase isoform b [Penaeus vannamei]	97.98	0	2178	GO:0000003,GO:0000902,GO:0000904,GO:0001558,GO:0001700,GO:0001932,GO:0001934,GO:0002064,GO:0002065,GO:0002066,GO:0002164,GO:0002165,GO:0002168,GO:0002250,GO:0002376,GO:0003006,GO:0003674,GO:0003824,GO:0005488,GO:0005515,GO:0005575,GO:0005622,GO:0005623,GO:0005737,GO:0005886,GO:0005942,GO:0005943,GO:0005975,GO:0006417,GO:0006464,GO:0006468,GO:0006629,GO:0006644,GO:0006650,GO:0006661,GO:0006793,GO:…	T
Mj-15531	XP_027229833.1	uncharacterized protein LOC113821528 isoform X1 [Penaeus vannamei]	49.33	7e-92	316	#N/A	#N/A
Mj-15539	XP_027220189.1	alpha-mannosidase 2x-like [Penaeus vannamei]	95.43	0	1000	#N/A	G
Mj-15545	XP_027217050.1	uncharacterized protein C6orf132 homolog isoform X2 [Penaeus vannamei]	94.37	0	1321	#N/A	#N/A
Mj-15554	ANW81830.1	calcium-calmodulin dependent protein kinase I [Penaeus vannamei]	99.69	0	661	GO:0003674,GO:0003824,GO:0004672,GO:0004674,GO:0004683,GO:0005488,GO:0005515,GO:0005516,GO:0005575,GO:0005622,GO:0005623,GO:0005737,GO:0005829,GO:0006464,GO:0006468,GO:0006793,GO:0006796,GO:0006807,GO:0007154,GO:0007165,GO:0008150,GO:0008152,GO:0009987,GO:0016301,GO:0016310,GO:0016740,GO:0016772,GO:0016773,GO:0018105,GO:0018107,GO:0018193,GO:0018209,GO:0018210,GO:0019538,GO:0023052,GO:0035556,GO:…	T
Mj-1557	#N/A	#N/A	#N/A	#N/A	#N/A	#N/A	#N/A
Mj-15577	XP_027207887.1	KAT8 regulatory NSL complex subunit 1-like isoform X2 [Penaeus vannamei]	96.63	0	825	GO:0000003,GO:0000123,GO:0002164,GO:0003006,GO:0003674,GO:0003682,GO:0005488,GO:0005515,GO:0005575,GO:0005622,GO:0005623,GO:0005634,GO:0005654,GO:0005694,GO:0005700,GO:0005705,GO:0005737,GO:0006355,GO:0007275,GO:0007276,GO:0007281,GO:0007292,GO:0007293,GO:0007525,GO:0007526,GO:0007528,GO:0008150,GO:0008283,GO:0009653,GO:0009791,GO:0009889,GO:0009891,GO:0009893,GO:0009987,GO:0010468,GO:0010556,GO:…	S
Mj-15578	ROT67065.1	putative nuclear pore complex protein [Penaeus vannamei]	77.25	0	695	GO:0001750,GO:0003674,GO:0005049,GO:0005575,GO:0005622,GO:0005623,GO:0005634,GO:0005654,GO:0005737,GO:0005829,GO:0005929,GO:0006403,GO:0006405,GO:0006406,GO:0006611,GO:0006810,GO:0006886,GO:0006913,GO:0008104,GO:0008150,GO:0008152,GO:0010467,GO:0015031,GO:0015833,GO:0015931,GO:0016032,GO:0031503,GO:0031974,GO:0031981,GO:0033036,GO:0034613,GO:0042886,GO:0042995,GO:0043005,GO:0043170,GO:0043226,GO:…	S
Mj-15589	BBC20717.1	integrin alpha ps [Penaeus japonicus]	99.85	0	1346	#N/A	W	phagocytosis-related
Mj-15595	XP_027229247.1	uncharacterized protein LOC113821017 [Penaeus vannamei]	57.79	0	548	GO:0000428,GO:0001817,GO:0001819,GO:0002682,GO:0002684,GO:0003674,GO:0003682,GO:0005488,GO:0005575,GO:0005622,GO:0005623,GO:0005634,GO:0005654,GO:0005666,GO:0005737,GO:0005829,GO:0008150,GO:0016604,GO:0016607,GO:0030880,GO:0031347,GO:0031349,GO:0031974,GO:0031981,GO:0032479,GO:0032481,GO:0032648,GO:0032728,GO:0032991,GO:0043226,GO:0043227,GO:0043229,GO:0043231,GO:0043233,GO:0044422,GO:0044424,GO:…	K
Mj-15606	ROT84324.1	hypothetical protein C7M84_022486 [Penaeus vannamei]	73.73	0	646	#N/A	#N/A
Mj-15620	XP_027211554.1	LOW QUALITY PROTEIN: probable Ras GTPase-activating protein [Penaeus vannamei]	96.95	0	2016	GO:0003674,GO:0005096,GO:0005575,GO:0005623,GO:0005886,GO:0008047,GO:0008150,GO:0009898,GO:0009966,GO:0009968,GO:0010646,GO:0010648,GO:0016020,GO:0023051,GO:0023057,GO:0030234,GO:0030695,GO:0031224,GO:0031226,GO:0031235,GO:0043085,GO:0043087,GO:0043547,GO:0044093,GO:0044425,GO:0044459,GO:0044464,GO:0046578,GO:0046580,GO:0048519,GO:0048523,GO:0048583,GO:0048585,GO:0050789,GO:0050790,GO:0050794,GO:…	T
Mj-15628	ROT81261.1	putative myosin light chain kinase [Penaeus vannamei]	91.48	0	1316	GO:0003674,GO:0003779,GO:0003824,GO:0004672,GO:0004674,GO:0004683,GO:0004687,GO:0005198,GO:0005200,GO:0005488,GO:0005515,GO:0005575,GO:0005622,GO:0005623,GO:0005737,GO:0006464,GO:0006468,GO:0006793,GO:0006796,GO:0006807,GO:0006996,GO:0007010,GO:0008092,GO:0008150,GO:0008152,GO:0009987,GO:0016043,GO:0016301,GO:0016310,GO:0016740,GO:0016772,GO:0016773,GO:0019538,GO:0030016,GO:0030017,GO:0030018,GO:…	T
Mj-15641	ROT79804.1	putative cytoplasmic polyadenylation element-binding protein 2 [Penaeus vannamei]	98.94	0	712	#N/A	#N/A
Mj-15647	XP_027217241.1	transcriptional repressor p66-beta-like, partial [Penaeus vannamei]	98.94	6e-159	506	GO:0000118,GO:0000122,GO:0000228,GO:0000785,GO:0000790,GO:0001708,GO:0003008,GO:0003674,GO:0005488,GO:0005515,GO:0005575,GO:0005622,GO:0005623,GO:0005634,GO:0005654,GO:0005694,GO:0006355,GO:0006357,GO:0007275,GO:0007507,GO:0007610,GO:0007611,GO:0007612,GO:0008150,GO:0008582,GO:0009889,GO:0009890,GO:0009892,GO:0009987,GO:0010468,GO:0010556,GO:0010558,GO:0010605,GO:0010629,GO:0016581,GO:0017053,GO:…	S
Mj-15657	XP_027207510.1	arginine/serine-rich protein PNISR-like isoform X2 [Penaeus vannamei]	95.2	0	785	#N/A	S
Mj-1566	XP_027231138.1	protein ABHD16A-like [Penaeus vannamei]	96.28	0	1093	GO:0003674,GO:0003824,GO:0006082,GO:0006629,GO:0006631,GO:0006638,GO:0006639,GO:0006690,GO:0006692,GO:0006693,GO:0008150,GO:0008152,GO:0009056,GO:0009062,GO:0009987,GO:0016042,GO:0016054,GO:0016298,GO:0016787,GO:0016788,GO:0019752,GO:0032787,GO:0033559,GO:0043436,GO:0044237,GO:0044238,GO:0044242,GO:0044248,GO:0044255,GO:0044281,GO:0044282,GO:0046395,GO:0046461,GO:0046462,GO:0046464,GO:0046486,GO:…	S
Mj-15663	XP_027209580.1	protein tramtrack, alpha isoform-like, partial [Penaeus vannamei]	87.96	2e-143	461	#N/A	S
Mj-15683	ROT68626.1	Na+/K+-ATPase alpha subunit [Penaeus vannamei]	99.09	0	1957	#N/A	P
Mj-15709	ROT81270.1	hypothetical protein C7M84_025558 [Penaeus vannamei]	78.38	7e-31	125	#N/A	#N/A
Mj-15729	XP_027228670.1	heterogeneous nuclear ribonucleoprotein K-like isoform X1 [Penaeus vannamei]	99.5	7e-115	372	GO:0000785,GO:0003674,GO:0003676,GO:0003723,GO:0003729,GO:0005488,GO:0005515,GO:0005575,GO:0005622,GO:0005623,GO:0005634,GO:0005654,GO:0005694,GO:0005737,GO:0007275,GO:0007444,GO:0007446,GO:0008134,GO:0008150,GO:0008283,GO:0009653,GO:0009888,GO:0009987,GO:0016604,GO:0016607,GO:0030154,GO:0031974,GO:0031981,GO:0032501,GO:0032502,GO:0032991,GO:0035062,GO:0035107,GO:0035265,GO:0035295,GO:0040007,GO:…	A
Mj-15730	XP_037780562.1	ETS-like protein pointed isoform X2 [Penaeus monodon]	98.9	0	800	GO:0000003,GO:0000578,GO:0000981,GO:0001067,GO:0001654,GO:0001655,GO:0001667,GO:0001736,GO:0001738,GO:0001742,GO:0001745,GO:0001751,GO:0001752,GO:0001754,GO:0001763,GO:0002009,GO:0002064,GO:0002065,GO:0002066,GO:0002165,GO:0002682,GO:0003002,GO:0003006,GO:0003674,GO:0003676,GO:0003677,GO:0003700,GO:0005488,GO:0005515,GO:0005575,GO:0005622,GO:0005623,GO:0005634,GO:0006355,GO:0006357,GO:0006928,GO:…	K
Mj-15739	XP_027224120.1	uncharacterized protein LOC113816281 [Penaeus vannamei]	95.38	0	736	#N/A	EI
Mj-15767	XP_027231548.1	LOW QUALITY PROTEIN: cartilage oligomeric matrix protein-like [Penaeus vannamei]	94.96	0	1458	GO:0003674,GO:0005488,GO:0005539,GO:0005575,GO:0005576,GO:0005912,GO:0005924,GO:0005927,GO:0007155,GO:0007275,GO:0007517,GO:0008150,GO:0008201,GO:0016203,GO:0022610,GO:0030054,GO:0030055,GO:0031012,GO:0032501,GO:0032502,GO:0032991,GO:0033627,GO:0043167,GO:0043168,GO:0044421,GO:0048513,GO:0048731,GO:0048856,GO:0060538,GO:0061061,GO:0062023,GO:0070161,GO:0097367,GO:1901681	O
Mj-15770	XP_027228505.1	cold shock domain-containing protein E1-like isoform X1 [Penaeus vannamei]	95.69	0	1697	GO:0003674,GO:0003676,GO:0003723,GO:0003729,GO:0003730,GO:0005488,GO:0005515,GO:0005575,GO:0005622,GO:0005623,GO:0005737,GO:0006417,GO:0007549,GO:0008150,GO:0009047,GO:0009889,GO:0009890,GO:0009892,GO:0009987,GO:0010468,GO:0010556,GO:0010558,GO:0010605,GO:0010608,GO:0010629,GO:0016043,GO:0017148,GO:0019222,GO:0022607,GO:0031323,GO:0031324,GO:0031326,GO:0031327,GO:0032268,GO:0032269,GO:0034248,GO:…	S
Mj-1578	XP_027235580.1	drebrin-like protein B isoform X1 [Penaeus vannamei]	90.16	0	1034	GO:0001786,GO:0003674,GO:0003779,GO:0005488,GO:0005515,GO:0005543,GO:0005546,GO:0005547,GO:0005575,GO:0005622,GO:0005623,GO:0005737,GO:0005856,GO:0005938,GO:0007275,GO:0007423,GO:0008092,GO:0008150,GO:0008289,GO:0008582,GO:0009987,GO:0016043,GO:0022416,GO:0030424,GO:0030426,GO:0030427,GO:0031594,GO:0032501,GO:0032502,GO:0033267,GO:0035091,GO:0040008,GO:0042995,GO:0043005,GO:0043167,GO:0043168,GO:…	Z
Mj-15802	XP_027208804.1	DNA ligase 1-like [Penaeus vannamei]	92	2e-70	243	#N/A	TZ
Mj-15803	XP_027223225.1	excitatory amino acid transporter 3-like isoform X1 [Penaeus vannamei]	93.47	0	883	#N/A	P
Mj-15820	ROT67998.1	putative angiopoietin-1 receptor [Penaeus vannamei]	59	0	851	#N/A	T
Mj-15826	XP_027232060.1	caspase-1-like isoform X2 [Penaeus vannamei]	80.38	0	1140	GO:0000003,GO:0000902,GO:0000904,GO:0001654,GO:0001700,GO:0002165,GO:0002376,GO:0003006,GO:0003674,GO:0003824,GO:0004175,GO:0004197,GO:0005488,GO:0005515,GO:0005575,GO:0005622,GO:0005623,GO:0005737,GO:0005829,GO:0006508,GO:0006582,GO:0006725,GO:0006807,GO:0006915,GO:0006919,GO:0006950,GO:0006952,GO:0006955,GO:0007154,GO:0007165,GO:0007275,GO:0007276,GO:0007281,GO:0007283,GO:0007286,GO:0007291,GO:…	D
Mj-15828	XP_027234590.1	RNA-binding protein 25-like isoform X3 [Penaeus vannamei]	99.21	3e-143	466	GO:0000375,GO:0000377,GO:0000398,GO:0003674,GO:0003676,GO:0003723,GO:0003729,GO:0005488,GO:0005575,GO:0005622,GO:0005623,GO:0005634,GO:0006139,GO:0006396,GO:0006397,GO:0006725,GO:0006807,GO:0008150,GO:0008152,GO:0008380,GO:0009987,GO:0010467,GO:0016070,GO:0016071,GO:0034641,GO:0043170,GO:0043226,GO:0043227,GO:0043229,GO:0043231,GO:0044237,GO:0044238,GO:0044424,GO:0044464,GO:0046483,GO:0071704,GO:…	A
Mj-15849	ROT73203.1	hypothetical protein C7M84_008367 [Penaeus vannamei]	97.9	0	681	#N/A	S
Mj-15851	XP_027220532.1	phenoloxidase-activating factor 2-like [Penaeus vannamei]	86.32	0	834	#N/A	O	melanization-related
Mj-15867	XP_027222075.1	uncharacterized protein LOC113814241, partial [Penaeus vannamei]	75.32	0	1690	GO:0003674,GO:0005215,GO:0005216,GO:0005261,GO:0005262,GO:0005575,GO:0006810,GO:0006811,GO:0006812,GO:0006813,GO:0006816,GO:0006950,GO:0008150,GO:0008324,GO:0009266,GO:0009408,GO:0009605,GO:0009628,GO:0009629,GO:0009987,GO:0015075,GO:0015085,GO:0015267,GO:0015318,GO:0015672,GO:0016020,GO:0016021,GO:0016043,GO:0022607,GO:0022803,GO:0022838,GO:0022857,GO:0022890,GO:0030001,GO:0031224,GO:0032991,GO:…	S
Mj-15873	ROT78695.1	putative F-box only protein 18-like [Penaeus vannamei]	81.73	0	1504	GO:0000018,GO:0000151,GO:0000724,GO:0000725,GO:0000737,GO:0000785,GO:0001932,GO:0001934,GO:0003674,GO:0003676,GO:0003677,GO:0003678,GO:0003690,GO:0003697,GO:0003824,GO:0004386,GO:0005488,GO:0005575,GO:0005622,GO:0005623,GO:0005634,GO:0005694,GO:0006139,GO:0006259,GO:0006260,GO:0006261,GO:0006275,GO:0006281,GO:0006282,GO:0006302,GO:0006308,GO:0006310,GO:0006464,GO:0006725,GO:0006807,GO:0006950,GO:…	L
Mj-15875	XP_027232069.1	eukaryotic translation initiation factor 3 subunit A-like, partial [Penaeus vannamei]	99.34	0	1218	GO:0001732,GO:0002181,GO:0002183,GO:0002188,GO:0003674,GO:0003676,GO:0003723,GO:0003729,GO:0003743,GO:0005488,GO:0005575,GO:0005622,GO:0005623,GO:0005737,GO:0005829,GO:0005852,GO:0006412,GO:0006413,GO:0006417,GO:0006446,GO:0006518,GO:0006807,GO:0008135,GO:0008150,GO:0008152,GO:0009058,GO:0009059,GO:0009889,GO:0009987,GO:0010467,GO:0010468,GO:0010556,GO:0010608,GO:0016043,GO:0019222,GO:0019538,GO:…	J
Mj-15894	ANA91274.1	dual oxidase [Penaeus japonicus]	99.86	0	2861	#N/A	PQ
Mj-15906	ROT63850.1	hypothetical protein C7M84_018231 [Penaeus vannamei]	98.53	7e-106	286	#N/A	TU
Mj-15929	XP_027216152.1	LIM domain-binding protein 2-like isoform X1 [Penaeus vannamei]	96.03	0	703	GO:0000902,GO:0000904,GO:0001085,GO:0001654,GO:0002009,GO:0002165,GO:0003002,GO:0003674,GO:0005488,GO:0005515,GO:0005575,GO:0005622,GO:0005623,GO:0005634,GO:0006355,GO:0006357,GO:0006928,GO:0006935,GO:0007275,GO:0007350,GO:0007389,GO:0007399,GO:0007409,GO:0007411,GO:0007423,GO:0007444,GO:0007472,GO:0007476,GO:0007507,GO:0007552,GO:0007560,GO:0007563,GO:0008134,GO:0008150,GO:0008407,GO:0008593,GO:…	K
Mj-15930	XP_027214182.1	synaptogyrin-like [Penaeus vannamei]	96.12	3e-105	337	#N/A	TU
Mj-15949	XP_027228199.1	moesin/ezrin/radixin homolog 1-like isoform X3 [Penaeus vannamei]	99.13	0	1035	GO:0000003,GO:0000226,GO:0000578,GO:0000785,GO:0000902,GO:0000904,GO:0001654,GO:0001745,GO:0001751,GO:0001754,GO:0002009,GO:0002164,GO:0002165,GO:0002168,GO:0003002,GO:0003006,GO:0003674,GO:0003779,GO:0005488,GO:0005515,GO:0005543,GO:0005546,GO:0005575,GO:0005622,GO:0005623,GO:0005634,GO:0005694,GO:0005700,GO:0005703,GO:0005737,GO:0005819,GO:0005829,GO:0005856,GO:0005886,GO:0005911,GO:0005912,GO:…	Z
Mj-15959	XP_027236258.1	LOW QUALITY PROTEIN: nidogen-2-like [Penaeus vannamei]	90.23	0	1025	GO:0005575,GO:0005576,GO:0005604,GO:0031012,GO:0044421,GO:0062023	MW
Mj-15960	BAD36808.1	transglutaminase, partial [Penaeus japonicus]	95.53	0	823	#N/A	S	clotting-related
Mj-15985	XP_027216919.1	polyadenylate-binding protein 4-like [Penaeus vannamei]	98.81	0	1009	#N/A	A
Mj-15987	XP_027217905.1	prickle planar cell polarity protein 3-like [Penaeus vannamei]	99.33	0	617	#N/A	TZ
Mj-15989	XP_027216152.1	LIM domain-binding protein 2-like isoform X1 [Penaeus vannamei]	96.06	0	710	GO:0000902,GO:0000904,GO:0001085,GO:0001654,GO:0002009,GO:0002165,GO:0003002,GO:0003674,GO:0005488,GO:0005515,GO:0005575,GO:0005622,GO:0005623,GO:0005634,GO:0006355,GO:0006357,GO:0006928,GO:0006935,GO:0007275,GO:0007350,GO:0007389,GO:0007399,GO:0007409,GO:0007411,GO:0007423,GO:0007444,GO:0007472,GO:0007476,GO:0007507,GO:0007552,GO:0007560,GO:0007563,GO:0008134,GO:0008150,GO:0008407,GO:0008593,GO:…	K
Mj-15999	ROT70691.1	putative E3 ubiquitin-protein ligase TRIM32 [Penaeus vannamei]	48.09	2e-137	436	GO:0000209,GO:0001558,GO:0001817,GO:0001819,GO:0001894,GO:0001959,GO:0001961,GO:0002376,GO:0003674,GO:0003676,GO:0003712,GO:0003713,GO:0003723,GO:0003824,GO:0004842,GO:0005488,GO:0005515,GO:0005575,GO:0005622,GO:0005623,GO:0005634,GO:0005737,GO:0005829,GO:0005856,GO:0005859,GO:0005863,GO:0006355,GO:0006464,GO:0006508,GO:0006511,GO:0006807,GO:0006950,GO:0006952,GO:0006955,GO:0006996,GO:0007010,GO:…	O
Mj-1602	XP_027215532.1	uncharacterized peptidase C1-like protein F26E4.3, partial [Penaeus vannamei]	82.11	0	608	GO:0003674,GO:0005488,GO:0005515,GO:0005575,GO:0005576,GO:0005615,GO:0005623,GO:0007155,GO:0008104,GO:0008150,GO:0009966,GO:0009967,GO:0010646,GO:0010647,GO:0017147,GO:0022610,GO:0023051,GO:0023056,GO:0030111,GO:0030177,GO:0030312,GO:0033036,GO:0035592,GO:0035593,GO:0042600,GO:0044421,GO:0044464,GO:0045184,GO:0048518,GO:0048522,GO:0048583,GO:0048584,GO:0050789,GO:0050794,GO:0051179,GO:0051234,GO:…	S
Mj-16104	#N/A	#N/A	#N/A	#N/A	#N/A	#N/A	#N/A
Mj-16106	XP_027231626.1	uncharacterized protein LOC113823205 [Penaeus vannamei]	59.18	0	875	#N/A	S
Mj-16119	ROT66296.1	putative calcium release-activated calcium channel protein [Penaeus vannamei]	91.95	8e-105	335	GO:0002115,GO:0003674,GO:0005215,GO:0005216,GO:0005261,GO:0005262,GO:0005575,GO:0005623,GO:0005886,GO:0005887,GO:0006810,GO:0006811,GO:0006812,GO:0006816,GO:0007275,GO:0007399,GO:0008150,GO:0008324,GO:0009966,GO:0009967,GO:0010646,GO:0010647,GO:0010959,GO:0015075,GO:0015085,GO:0015267,GO:0015279,GO:0015318,GO:0016020,GO:0016021,GO:0022803,GO:0022838,GO:0022857,GO:0022890,GO:0023051,GO:0023056,GO:…	A
Mj-16123	XP_027227964.1	FAST kinase domain-containing protein 3, mitochondrial-like [Penaeus vannamei]	94.21	0	1317	GO:0003674,GO:0003824,GO:0004177,GO:0006508,GO:0006807,GO:0008150,GO:0008152,GO:0008233,GO:0008238,GO:0008239,GO:0016787,GO:0019538,GO:0043170,GO:0044238,GO:0070011,GO:0071704,GO:0140096,GO:1901564	E
Mj-16125	XP_027238274.1	uncharacterized protein LOC113829325 [Penaeus vannamei]	78.26	0	947	#N/A	K
Mj-16128	XP_027224368.1	serine/threonine-protein kinase 3-like isoform X3 [Penaeus vannamei]	90.82	4e-150	476	GO:0000003,GO:0001654,GO:0001667,GO:0001708,GO:0001745,GO:0001751,GO:0001752,GO:0001754,GO:0001932,GO:0001934,GO:0002009,GO:0002011,GO:0002064,GO:0002065,GO:0002066,GO:0003006,GO:0003674,GO:0003824,GO:0004672,GO:0004674,GO:0005488,GO:0005515,GO:0005575,GO:0005622,GO:0005623,GO:0005737,GO:0005829,GO:0005911,GO:0005938,GO:0006464,GO:0006468,GO:0006508,GO:0006793,GO:0006796,GO:0006807,GO:0006915,GO:…	T
Mj-16135	XP_027209847.1	protein NDRG3-like [Penaeus vannamei]	97.86	0	772	GO:0005575,GO:0005622,GO:0005623,GO:0005737,GO:0008150,GO:0009966,GO:0009967,GO:0010646,GO:0010647,GO:0023051,GO:0023056,GO:0044424,GO:0044464,GO:0046578,GO:0046579,GO:0048518,GO:0048522,GO:0048583,GO:0048584,GO:0050789,GO:0050794,GO:0051056,GO:0051057,GO:0065007,GO:1902531,GO:1902533	S
Mj-16160	XP_027213873.1	microtubule-associated serine/threonine-protein kinase 2-like [Penaeus vannamei]	89.19	0	987	#N/A	T
Mj-16168	ROT72176.1	hypothetical protein C7M84_009419 [Penaeus vannamei]	94.29	2e-61	208	GO:0000276,GO:0005575,GO:0005622,GO:0005623,GO:0005737,GO:0005739,GO:0005740,GO:0005743,GO:0005753,GO:0006810,GO:0006811,GO:0006812,GO:0008150,GO:0015672,GO:0016020,GO:0016469,GO:0019866,GO:0031090,GO:0031966,GO:0031967,GO:0031975,GO:0032991,GO:0033177,GO:0034220,GO:0043226,GO:0043227,GO:0043229,GO:0043231,GO:0044422,GO:0044424,GO:0044425,GO:0044429,GO:0044444,GO:0044446,GO:0044455,GO:0044464,GO:…	C
Mj-16178	ROT82693.1	putative receptor-type tyrosine-protein phosphatase epsilon isoform X4 [Penaeus vannamei]	68.17	0	682	#N/A	T
Mj-16190	XP_027210177.1	titin-like isoform X3 [Penaeus vannamei]	98.22	4e-61	233	#N/A	Z
Mj-16193	XP_027234284.1	protein SON-like [Penaeus vannamei]	99.22	0	758	GO:0003674,GO:0003676,GO:0003723,GO:0003725,GO:0005488,GO:0097159,GO:1901363	A
Mj-16205	ROT80797.1	putative sodium-coupled monocarboxylate transporter 1-like [Penaeus vannamei]	79.17	0	855	#N/A	P
Mj-16223	XP_027214069.1	src substrate cortactin-like isoform X4 [Penaeus vannamei]	80.36	0	694	GO:0000902,GO:0001558,GO:0001726,GO:0002102,GO:0003674,GO:0005488,GO:0005515,GO:0005522,GO:0005575,GO:0005622,GO:0005623,GO:0005737,GO:0005794,GO:0005819,GO:0005829,GO:0005856,GO:0005886,GO:0005905,GO:0005938,GO:0006810,GO:0006886,GO:0006897,GO:0006898,GO:0006928,GO:0006929,GO:0006930,GO:0006937,GO:0006940,GO:0006996,GO:0007010,GO:0007044,GO:0007045,GO:0007155,GO:0007160,GO:0007275,GO:0007399,GO:…	T
Mj-16265	XP_027224375.1	serine/threonine-protein kinase 4-like isoform X4 [Penaeus vannamei]	94.05	0	1065	GO:0000003,GO:0001654,GO:0001667,GO:0001708,GO:0001745,GO:0001751,GO:0001752,GO:0001754,GO:0001932,GO:0001934,GO:0002009,GO:0002011,GO:0002064,GO:0002065,GO:0002066,GO:0003006,GO:0003674,GO:0003824,GO:0004672,GO:0004674,GO:0005488,GO:0005515,GO:0005575,GO:0005622,GO:0005623,GO:0005737,GO:0005829,GO:0005911,GO:0005938,GO:0006464,GO:0006468,GO:0006508,GO:0006793,GO:0006796,GO:0006807,GO:0006915,GO:…	T
Mj-16268	#N/A	#N/A	#N/A	#N/A	#N/A	#N/A	#N/A
Mj-1627	ROT71629.1	Mediator of RNA polymerase II transcription subunit 16 [Penaeus vannamei]	76.4	2e-119	392	#N/A	#N/A
Mj-16280	ABD92928.1	hemocyte transglutaminase [Penaeus japonicus]	99.74	0	1557	#N/A	S	clotting-related
Mj-16281	ROT75901.1	hypothetical protein C7M84_005546 [Penaeus vannamei]	34.44	5e-42	159	#N/A	#N/A
Mj-16290	ABD92928.1	hemocyte transglutaminase [Penaeus japonicus]	99.74	0	1557	#N/A	S	clotting-related
Mj-16291	#N/A	#N/A	#N/A	#N/A	#N/A	#N/A	#N/A
Mj-16301	XP_027218371.1	delta(7)-sterol 5(6)-desaturase-like [Penaeus vannamei]	91.54	0	696	#N/A	I
Mj-16308	BAB70485.1	prophenoloxidase [Penaeus japonicus]	99.68	0	645	GO:0002252,GO:0002376,GO:0003674,GO:0003824,GO:0004097,GO:0004497,GO:0004503,GO:0005575,GO:0005576,GO:0005615,GO:0006082,GO:0006520,GO:0006570,GO:0006582,GO:0006583,GO:0006584,GO:0006725,GO:0006807,GO:0006950,GO:0006952,GO:0006955,GO:0008150,GO:0008152,GO:0009058,GO:0009072,GO:0009605,GO:0009607,GO:0009617,GO:0009620,GO:0009712,GO:0009987,GO:0016491,GO:0016679,GO:0016682,GO:0016705,GO:0016716,GO:…	E	melanization-related
Mj-16309	XP_027216397.1	uncharacterized protein LOC113809109 [Penaeus vannamei]	70.86	0	707	#N/A	#N/A
Mj-16325	#N/A	#N/A	#N/A	#N/A	#N/A	#N/A	#N/A
Mj-16328	XP_027218158.1	uncharacterized protein LOC113810727 [Penaeus vannamei]	98.65	0	862	GO:0003674,GO:0005488,GO:0005515,GO:0006457,GO:0008150,GO:0009987,GO:0051082	O
Mj-1633	XP_027219589.1	ubiquitin carboxyl-terminal hydrolase MINDY-1-like [Penaeus vannamei]	90.07	0	962	#N/A	S
Mj-16347	ROT75502.1	hypothetical protein C7M84_005959 [Penaeus vannamei]	98.82	0	1184	GO:0003674,GO:0003824,GO:0005575,GO:0005622,GO:0005623,GO:0006491,GO:0006807,GO:0008150,GO:0008152,GO:0008194,GO:0008378,GO:0009100,GO:0009987,GO:0016740,GO:0016757,GO:0016758,GO:0019538,GO:0035250,GO:0043170,GO:0043226,GO:0043229,GO:0044237,GO:0044238,GO:0044260,GO:0044424,GO:0044464,GO:0071704,GO:1901135,GO:1901564	S
Mj-16351	#N/A	#N/A	#N/A	#N/A	#N/A	#N/A	#N/A
Mj-16352	XP_027220594.1	peroxisome biogenesis factor 1-like [Penaeus vannamei]	75.89	0	1571	GO:0000166,GO:0003674,GO:0003824,GO:0005488,GO:0005515,GO:0005524,GO:0005575,GO:0005622,GO:0005623,GO:0005737,GO:0005777,GO:0005778,GO:0005829,GO:0006605,GO:0006625,GO:0006810,GO:0006886,GO:0006996,GO:0007017,GO:0007031,GO:0008022,GO:0008104,GO:0008144,GO:0008150,GO:0009987,GO:0015031,GO:0015833,GO:0015919,GO:0016020,GO:0016043,GO:0016462,GO:0016558,GO:0016787,GO:0016817,GO:0016818,GO:0016887,GO:…	O
Mj-16354	ROT65997.1	hypothetical protein C7M84_016004 [Penaeus vannamei]	55.07	4e-45	172	#N/A	#N/A
Mj-16360	XP_027218808.1	intracellular protein transport protein USO1-like isoform X2 [Penaeus vannamei]	83.81	0	1226	#N/A	#N/A
Mj-16378	XP_027213861.1	LOW QUALITY PROTEIN: MOG interacting and ectopic P-granules protein 1-like [Penaeus vannamei]	89.44	0	1177	GO:0000118,GO:0000122,GO:0000228,GO:0000785,GO:0000790,GO:0003674,GO:0003682,GO:0005488,GO:0005515,GO:0005575,GO:0005622,GO:0005623,GO:0005634,GO:0005654,GO:0005694,GO:0005700,GO:0006355,GO:0006357,GO:0008150,GO:0009889,GO:0009890,GO:0009892,GO:0010468,GO:0010556,GO:0010558,GO:0010605,GO:0010629,GO:0016581,GO:0017053,GO:0019219,GO:0019222,GO:0031323,GO:0031324,GO:0031326,GO:0031327,GO:0031974,GO:…	A
Mj-16440	XP_027239590.1	calcium-activated chloride channel regulator 1-like [Penaeus vannamei]	86.79	0	1323	#N/A	S
Mj-16442	XP_027212137.1	uncharacterized protein LOC113805345 [Penaeus vannamei]	70.38	0	836	#N/A	S
Mj-16463	ROT82820.1	Transcription initiation factor IIB [Penaeus vannamei]	99.68	0	617	GO:0001173,GO:0001174,GO:0003674,GO:0005488,GO:0005515,GO:0005575,GO:0005622,GO:0005623,GO:0005634,GO:0006139,GO:0006351,GO:0006352,GO:0006355,GO:0006357,GO:0006366,GO:0006367,GO:0006725,GO:0006807,GO:0008134,GO:0008150,GO:0008152,GO:0009058,GO:0009059,GO:0009889,GO:0009987,GO:0010467,GO:0010468,GO:0010556,GO:0016070,GO:0018130,GO:0019219,GO:0019222,GO:0019438,GO:0031323,GO:0031326,GO:0032774,GO:…	K
Mj-16465	XP_027213060.1	poly [ADP-ribose] polymerase 12-like isoform X1 [Penaeus vannamei]	67.24	0	1105	#N/A	S
Mj-16479	XP_027208341.1	uncharacterized protein LOC113802078 isoform X1 [Penaeus vannamei]	91.83	0	978	GO:0000003,GO:0001775,GO:0007338,GO:0007343,GO:0008150,GO:0009566,GO:0009987,GO:0019953,GO:0022414,GO:0044703,GO:0051704	L
Mj-16501	XP_027219572.1	mediator of RNA polymerase II transcription subunit 16-like [Penaeus vannamei]	96.71	0	1630	GO:0002237,GO:0003674,GO:0003712,GO:0003713,GO:0005575,GO:0005622,GO:0005623,GO:0005634,GO:0005654,GO:0006139,GO:0006351,GO:0006352,GO:0006355,GO:0006357,GO:0006366,GO:0006367,GO:0006725,GO:0006807,GO:0006950,GO:0008150,GO:0008152,GO:0009058,GO:0009059,GO:0009266,GO:0009408,GO:0009605,GO:0009607,GO:0009617,GO:0009628,GO:0009889,GO:0009891,GO:0009893,GO:0009987,GO:0010033,GO:0010467,GO:0010468,GO:…	K
Mj-16516	XP_027229675.1	dual oxidase maturation factor 1-like isoform X1 [Penaeus vannamei]	83.9	2e-174	520	#N/A	S
Mj-16518	ROT69248.1	hypothetical protein C7M84_012564 [Penaeus vannamei]	89.53	0	666	GO:0005575,GO:0005576,GO:0005615,GO:0007155,GO:0007275,GO:0007399,GO:0008037,GO:0008038,GO:0008039,GO:0008150,GO:0009987,GO:0016043,GO:0022008,GO:0022610,GO:0030154,GO:0030182,GO:0030198,GO:0032501,GO:0032502,GO:0043062,GO:0044421,GO:0048468,GO:0048666,GO:0048699,GO:0048731,GO:0048856,GO:0048869,GO:0071840	S
Mj-16521	XP_027217037.1	uncharacterized protein LOC113809601 [Penaeus vannamei]	86.17	0	796	#N/A	G
Mj-16527	ROT74380.1	fructose 1,6-biphosphate-aldolase A [Penaeus vannamei]	96.15	0	782	GO:0000027,GO:0002181,GO:0003674,GO:0003676,GO:0003723,GO:0003735,GO:0005198,GO:0005488,GO:0005515,GO:0005575,GO:0005622,GO:0005623,GO:0005737,GO:0005829,GO:0005840,GO:0006412,GO:0006518,GO:0006807,GO:0006996,GO:0008097,GO:0008150,GO:0008152,GO:0009058,GO:0009059,GO:0009987,GO:0010467,GO:0015934,GO:0016043,GO:0019538,GO:0019843,GO:0022607,GO:0022613,GO:0022618,GO:0022625,GO:0022626,GO:0032991,GO:…	J
Mj-1653	ROT77957.1	hypothetical protein C7M84_003331 [Penaeus vannamei]	64.23	2e-95	303	#N/A	#N/A
Mj-16547	XP_027221172.1	G-protein coupled receptor moody-like [Penaeus vannamei]	81.14	0	861	GO:0003674,GO:0004888,GO:0004930,GO:0005575,GO:0005623,GO:0005886,GO:0005911,GO:0005918,GO:0005919,GO:0006996,GO:0007010,GO:0007043,GO:0007154,GO:0007165,GO:0007186,GO:0007272,GO:0007275,GO:0007399,GO:0007417,GO:0007419,GO:0007610,GO:0008150,GO:0008366,GO:0009410,GO:0009636,GO:0009987,GO:0010001,GO:0010033,GO:0010243,GO:0014070,GO:0016020,GO:0016021,GO:0016043,GO:0019991,GO:0021782,GO:0022008,GO:…	T
Mj-16561	XP_027231140.1	uncharacterized protein LOC113822805 [Penaeus vannamei]	70.26	2e-113	365	#N/A	#N/A
Mj-16604	XP_027224750.1	serine/threonine-protein kinase PAK 2-like [Penaeus vannamei]	98.43	1e-163	489	GO:0000768,GO:0001726,GO:0001932,GO:0001934,GO:0003674,GO:0003824,GO:0004672,GO:0004674,GO:0005488,GO:0005515,GO:0005575,GO:0005622,GO:0005623,GO:0005737,GO:0006464,GO:0006468,GO:0006793,GO:0006796,GO:0006807,GO:0006928,GO:0006949,GO:0006950,GO:0006996,GO:0007010,GO:0007015,GO:0007154,GO:0007165,GO:0007264,GO:0007265,GO:0007266,GO:0007275,GO:0007346,GO:0007399,GO:0007520,GO:0008150,GO:0008152,GO:…	T
Mj-16606	XP_027218132.1	uncharacterized protein LOC113810692 [Penaeus vannamei]	92.02	9e-132	405	#N/A	#N/A
Mj-16611	XP_027217676.1	uncharacterized protein ZK1073.1-like [Penaeus vannamei]	99.13	0	713	#N/A	S
Mj-16612	XP_027227483.1	chloride intracellular channel exc-4-like [Penaeus vannamei]	98.92	1e-122	381	GO:0003674,GO:0005215,GO:0005216,GO:0005253,GO:0005254,GO:0005488,GO:0005509,GO:0005575,GO:0005622,GO:0005623,GO:0005737,GO:0005739,GO:0006810,GO:0006811,GO:0006820,GO:0006821,GO:0008150,GO:0008289,GO:0008509,GO:0009605,GO:0009628,GO:0009629,GO:0010033,GO:0015075,GO:0015103,GO:0015108,GO:0015267,GO:0015318,GO:0015698,GO:0016020,GO:0022803,GO:0022838,GO:0022857,GO:0034220,GO:0040011,GO:0042221,GO:…	P
Mj-16634	ROT83048.1	putative M-phase inducer phosphatase [Penaeus vannamei]	91.19	0	1050	GO:0000086,GO:0000226,GO:0000278,GO:0002009,GO:0002165,GO:0003674,GO:0003824,GO:0004721,GO:0004725,GO:0005575,GO:0005622,GO:0005623,GO:0005634,GO:0005694,GO:0006464,GO:0006470,GO:0006793,GO:0006796,GO:0006807,GO:0006996,GO:0007010,GO:0007017,GO:0007030,GO:0007049,GO:0007098,GO:0007099,GO:0007275,GO:0007346,GO:0007369,GO:0007399,GO:0007422,GO:0007424,GO:0007444,GO:0007488,GO:0007498,GO:0007552,GO:…	D
Mj-16640	XP_027231412.1	LOW QUALITY PROTEIN: WW domain-containing adapter protein with coiled-coil-like [Penaeus vannamei]	99.16	0	674	GO:0000323,GO:0003008,GO:0005575,GO:0005622,GO:0005623,GO:0005634,GO:0005737,GO:0005764,GO:0005773,GO:0006325,GO:0006464,GO:0006513,GO:0006807,GO:0006996,GO:0007610,GO:0007611,GO:0007612,GO:0008150,GO:0008152,GO:0009892,GO:0009894,GO:0009895,GO:0009966,GO:0009967,GO:0009987,GO:0010390,GO:0010506,GO:0010507,GO:0010646,GO:0010647,GO:0016043,GO:0016567,GO:0016569,GO:0016570,GO:0016574,GO:0019222,GO:…	A
Mj-16643	XP_027232480.1	tumor necrosis factor alpha-induced protein 8-like protein [Penaeus vannamei]	98.4	2e-95	305	GO:0001932,GO:0001934,GO:0003674,GO:0004857,GO:0004866,GO:0004869,GO:0005575,GO:0005622,GO:0005623,GO:0005737,GO:0006915,GO:0007275,GO:0007431,GO:0007435,GO:0008150,GO:0008219,GO:0009653,GO:0009887,GO:0009892,GO:0009893,GO:0009894,GO:0009966,GO:0009967,GO:0009987,GO:0010466,GO:0010506,GO:0010562,GO:0010604,GO:0010605,GO:0010646,GO:0010647,GO:0010941,GO:0010942,GO:0010951,GO:0012501,GO:0019220,GO:…	S
Mj-16649	ROT84015.1	hypothetical protein C7M84_022804 [Penaeus vannamei]	78.68	8e-154	470	#N/A	#N/A
Mj-16656	XP_027235203.1	membrane metallo-endopeptidase-like 1 isoform X6 [Penaeus vannamei]	75.55	0	737	#N/A	E
Mj-16672	XP_027212146.1	zinc transporter foi-like [Penaeus vannamei]	97.97	0	747	GO:0000003,GO:0000041,GO:0001763,GO:0002009,GO:0003006,GO:0003674,GO:0005215,GO:0005385,GO:0005575,GO:0005623,GO:0005886,GO:0005887,GO:0006810,GO:0006811,GO:0006812,GO:0006829,GO:0006873,GO:0006875,GO:0006882,GO:0006928,GO:0007275,GO:0007276,GO:0007280,GO:0007399,GO:0007417,GO:0007424,GO:0007498,GO:0007506,GO:0007548,GO:0008150,GO:0008324,GO:0008354,GO:0008406,GO:0009653,GO:0009887,GO:0009888,GO:…	P
Mj-16699	ROT67869.1	taurine transporter [Penaeus vannamei]	95.07	3e-144	449	#N/A	T
Mj-1670	ROT65488.1	putative protein BTG3-like [Penaeus vannamei]	94.58	5e-163	491	#N/A	T
Mj-16705	ROT63220.1	putative long-chain-fatty-acid--CoA ligase 4 isoform X1 [Penaeus vannamei]	94.35	0	1294	GO:0000902,GO:0000904,GO:0001676,GO:0003002,GO:0003674,GO:0003824,GO:0004467,GO:0005575,GO:0005622,GO:0005623,GO:0005737,GO:0005777,GO:0005783,GO:0006082,GO:0006139,GO:0006163,GO:0006164,GO:0006355,GO:0006357,GO:0006629,GO:0006631,GO:0006633,GO:0006637,GO:0006644,GO:0006650,GO:0006655,GO:0006725,GO:0006732,GO:0006753,GO:0006790,GO:0006793,GO:0006796,GO:0006807,GO:0006810,GO:0006928,GO:0006935,GO:…	I
Mj-16712	BAB83773.1	prophenoloxidase [Penaeus japonicus]	99.4	0	1386	GO:0002252,GO:0002376,GO:0003674,GO:0003824,GO:0004097,GO:0004497,GO:0004503,GO:0005575,GO:0005576,GO:0005615,GO:0006082,GO:0006520,GO:0006570,GO:0006582,GO:0006583,GO:0006584,GO:0006725,GO:0006807,GO:0006950,GO:0006952,GO:0006955,GO:0008150,GO:0008152,GO:0009058,GO:0009072,GO:0009605,GO:0009607,GO:0009617,GO:0009620,GO:0009712,GO:0009987,GO:0016491,GO:0016679,GO:0016682,GO:0016705,GO:0016716,GO:…	Q	melanization-related
Mj-16731	XP_027229734.1	coagulation factor IX-like [Penaeus vannamei]	81.09	0	813	#N/A	O	clotting-related
Mj-16761	XP_027231701.1	nuclear receptor coactivator 6-like [Penaeus vannamei]	97.28	0	647	#N/A	#N/A
Mj-16764	AKM12661.1	syntenin [Penaeus japonicus]	99.06	0	572	#N/A	K
Mj-16769	XP_027239003.1	nucleolar protein 58-like [Penaeus vannamei]	100	9e-27	109	#N/A	#N/A
Mj-16794	XP_027216871.1	uncharacterized protein LOC113809459 [Penaeus vannamei]	48.5	2e-69	239	#N/A	#N/A
Mj-16810	XP_027227483.1	chloride intracellular channel exc-4-like [Penaeus vannamei]	99.6	2e-180	529	GO:0003674,GO:0005215,GO:0005216,GO:0005253,GO:0005254,GO:0005488,GO:0005509,GO:0005575,GO:0005622,GO:0005623,GO:0005737,GO:0005739,GO:0006810,GO:0006811,GO:0006820,GO:0006821,GO:0008150,GO:0008289,GO:0008509,GO:0009605,GO:0009628,GO:0009629,GO:0010033,GO:0015075,GO:0015103,GO:0015108,GO:0015267,GO:0015318,GO:0015698,GO:0016020,GO:0022803,GO:0022838,GO:0022857,GO:0034220,GO:0040011,GO:0042221,GO:…	P
Mj-16832	XP_027235196.1	membrane metallo-endopeptidase-like 1 isoform X1 [Penaeus vannamei]	75.31	0	648	#N/A	E
Mj-16858	XP_027206441.1	leukocyte elastase inhibitor-like [Penaeus vannamei]	79.08	0	555	GO:0002009,GO:0002165,GO:0003674,GO:0004857,GO:0004866,GO:0004867,GO:0005575,GO:0005576,GO:0005615,GO:0007275,GO:0007444,GO:0007472,GO:0007476,GO:0007552,GO:0007560,GO:0008150,GO:0008592,GO:0009605,GO:0009607,GO:0009620,GO:0009653,GO:0009791,GO:0009886,GO:0009887,GO:0009888,GO:0009892,GO:0009966,GO:0009968,GO:0010466,GO:0010605,GO:0010646,GO:0010648,GO:0010951,GO:0019222,GO:0023051,GO:0023057,GO:…	V
Mj-16868	XP_027231626.1	uncharacterized protein LOC113823205 [Penaeus vannamei]	59.03	0	743	#N/A	S
Mj-16869	XP_027237553.1	LOW QUALITY PROTEIN: phenoloxidase 3-like [Penaeus vannamei]	86.15	0	1263	GO:0002252,GO:0002376,GO:0003674,GO:0003824,GO:0004097,GO:0004497,GO:0004503,GO:0005575,GO:0005576,GO:0005615,GO:0006082,GO:0006520,GO:0006570,GO:0006582,GO:0006583,GO:0006584,GO:0006725,GO:0006807,GO:0006950,GO:0006952,GO:0006955,GO:0008150,GO:0008152,GO:0009058,GO:0009072,GO:0009605,GO:0009607,GO:0009617,GO:0009620,GO:0009712,GO:0009987,GO:0016491,GO:0016679,GO:0016682,GO:0016705,GO:0016716,GO:…	E	melanization-related
Mj-16878	XP_027209364.1	uncharacterized protein LOC113802913 [Penaeus vannamei]	43.22	8e-55	192	#N/A	S
Mj-16885	XP_027230652.1	zinc finger protein 665-like [Penaeus vannamei]	70.08	0	1009	#N/A	#N/A
Mj-16888	XP_027208479.1	LOW QUALITY PROTEIN: protein phosphatase 1 regulatory subunit 3C-like, partial [Penaeus vannamei]	89.42	4e-173	515	GO:0001871,GO:0003674,GO:0005488,GO:0005515,GO:0006109,GO:0007610,GO:0008150,GO:0008157,GO:0009636,GO:0010033,GO:0010675,GO:0010906,GO:0019222,GO:0019899,GO:0019902,GO:0019903,GO:0030246,GO:0030247,GO:0030534,GO:0031323,GO:0032501,GO:0032881,GO:0042221,GO:0042493,GO:0043467,GO:0045471,GO:0046677,GO:0048149,GO:0050789,GO:0050794,GO:0050896,GO:0060255,GO:0062012,GO:0065007,GO:0070873,GO:0080090,GO:…	OT
Mj-16919	XP_027237553.1	LOW QUALITY PROTEIN: phenoloxidase 3-like [Penaeus vannamei]	86.11	0	1184	GO:0002252,GO:0002376,GO:0003674,GO:0003824,GO:0004097,GO:0004497,GO:0004503,GO:0005575,GO:0005576,GO:0005615,GO:0006082,GO:0006520,GO:0006570,GO:0006582,GO:0006583,GO:0006584,GO:0006725,GO:0006807,GO:0006950,GO:0006952,GO:0006955,GO:0008150,GO:0008152,GO:0009058,GO:0009072,GO:0009605,GO:0009607,GO:0009617,GO:0009620,GO:0009712,GO:0009987,GO:0016491,GO:0016679,GO:0016682,GO:0016705,GO:0016716,GO:…	E	melanization-related
Mj-16935	XP_027227184.1	transmembrane protein 59-like isoform X1 [Penaeus vannamei]	89.81	5e-172	508	#N/A	S
Mj-16937	XP_027210749.1	uncharacterized protein LOC113804113 [Penaeus vannamei]	81.3	6e-88	286	GO:0001736,GO:0001738,GO:0002009,GO:0002165,GO:0005575,GO:0005622,GO:0005623,GO:0005634,GO:0007164,GO:0007275,GO:0007399,GO:0007444,GO:0007472,GO:0007476,GO:0007552,GO:0007560,GO:0008150,GO:0008544,GO:0008589,GO:0009653,GO:0009791,GO:0009886,GO:0009887,GO:0009888,GO:0009913,GO:0009966,GO:0009968,GO:0009987,GO:0010646,GO:0010648,GO:0016043,GO:0022008,GO:0023051,GO:0023057,GO:0030030,GO:0030154,GO:…	S
Mj-16989	ROT62075.1	hypothetical protein C7M84_020096 [Penaeus vannamei]	67.69	7e-09	61.2	#N/A	#N/A
Mj-17	XP_027232250.1	mucin-12-like isoform X1 [Penaeus vannamei]	91.53	0	1642	#N/A	#N/A
Mj-17013	ALI93851.1	DEAD-box RNA helicase variant 2 [Penaeus vannamei]	98.34	0	695	#N/A	A
Mj-17048	XP_027235564.1	annexin B10-like isoform X4 [Penaeus vannamei]	91.76	0	661	GO:0003674,GO:0003779,GO:0005488,GO:0005515,GO:0005543,GO:0005544,GO:0006139,GO:0006351,GO:0006355,GO:0006357,GO:0006725,GO:0006807,GO:0008092,GO:0008150,GO:0008152,GO:0008289,GO:0009058,GO:0009059,GO:0009889,GO:0009987,GO:0010467,GO:0010468,GO:0010556,GO:0016070,GO:0018130,GO:0019219,GO:0019222,GO:0019438,GO:0031323,GO:0031326,GO:0032774,GO:0034641,GO:0034645,GO:0034654,GO:0043167,GO:0043168,GO:…	U
Mj-17063	BAH28836.1	elongation factor 1-alpha [Penaeus japonicus]	99.11	0	917	GO:0003674,GO:0003676,GO:0003723,GO:0003746,GO:0003824,GO:0003924,GO:0005488,GO:0005575,GO:0005622,GO:0005623,GO:0005737,GO:0005853,GO:0006412,GO:0006414,GO:0006518,GO:0006807,GO:0008135,GO:0008150,GO:0008152,GO:0009058,GO:0009059,GO:0009987,GO:0010467,GO:0016462,GO:0016787,GO:0016817,GO:0016818,GO:0017111,GO:0019538,GO:0032991,GO:0034641,GO:0034645,GO:0043043,GO:0043170,GO:0043603,GO:0043604,GO:…	J
Mj-1710	#N/A	#N/A	#N/A	#N/A	#N/A	#N/A	#N/A
Mj-17103	AUS89443.1	sex-lethal variant 1 [Penaeus vannamei]	99.6	5e-148	442	GO:0000003,GO:0000280,GO:0000375,GO:0000377,GO:0000380,GO:0000381,GO:0000398,GO:0000900,GO:0003006,GO:0003674,GO:0003676,GO:0003723,GO:0003727,GO:0003729,GO:0003730,GO:0005488,GO:0005515,GO:0005575,GO:0005622,GO:0005623,GO:0005634,GO:0005737,GO:0006139,GO:0006259,GO:0006310,GO:0006396,GO:0006397,GO:0006417,GO:0006725,GO:0006807,GO:0006950,GO:0006952,GO:0006996,GO:0007049,GO:0007127,GO:0007131,GO:…	A
Mj-17130	XP_027223696.1	protein spinster-like isoform X1 [Penaeus vannamei]	89.39	0	1020	GO:0000003,GO:0000323,GO:0002165,GO:0003006,GO:0003376,GO:0003674,GO:0005215,GO:0005319,GO:0005575,GO:0005622,GO:0005623,GO:0005737,GO:0005764,GO:0005765,GO:0005768,GO:0005770,GO:0005773,GO:0005774,GO:0006810,GO:0006869,GO:0006897,GO:0006915,GO:0006928,GO:0006950,GO:0006996,GO:0007033,GO:0007034,GO:0007040,GO:0007041,GO:0007154,GO:0007165,GO:0007186,GO:0007275,GO:0007276,GO:0007281,GO:0007292,GO:…	G
Mj-17133	XP_027212613.1	serine proteinase stubble-like [Penaeus vannamei]	80	5e-153	467	#N/A	O
Mj-17167	XP_027229320.1	LOW QUALITY PROTEIN: SH3 domain-binding glutamic acid-rich protein homolog [Penaeus vannamei]	91.8	6e-68	229	#N/A	S
Mj-17187	ROT72922.1	actin [Penaeus vannamei]	97.05	0	880	GO:0000003,GO:0000768,GO:0000902,GO:0000904,GO:0001700,GO:0002064,GO:0002065,GO:0002066,GO:0003006,GO:0003674,GO:0005198,GO:0005200,GO:0005575,GO:0005622,GO:0005623,GO:0005856,GO:0005884,GO:0005885,GO:0006810,GO:0006886,GO:0006949,GO:0006996,GO:0007009,GO:0007010,GO:0007015,GO:0007049,GO:0007275,GO:0007276,GO:0007281,GO:0007292,GO:0007399,GO:0007413,GO:0007423,GO:0007520,GO:0008037,GO:0008038,GO:…	Z
Mj-17211	XP_027212241.1	acidic proline-rich protein PRP25-like [Penaeus vannamei]	80.91	1e-53	188	GO:0000823,GO:0003674,GO:0003824,GO:0005575,GO:0005622,GO:0005623,GO:0005634,GO:0005654,GO:0006066,GO:0006793,GO:0006796,GO:0007275,GO:0007444,GO:0008150,GO:0008152,GO:0008440,GO:0009058,GO:0009888,GO:0009987,GO:0016301,GO:0016310,GO:0016740,GO:0016772,GO:0016773,GO:0019637,GO:0019751,GO:0031974,GO:0031981,GO:0032501,GO:0032502,GO:0032958,GO:0035295,GO:0043226,GO:0043227,GO:0043229,GO:0043231,GO:…	G
Mj-17216	AAG16253.1	beta-actin [Penaeus vannamei]	100	0	788	GO:0000228,GO:0000278,GO:0000281,GO:0000785,GO:0000790,GO:0000910,GO:0003674,GO:0005198,GO:0005200,GO:0005575,GO:0005622,GO:0005623,GO:0005634,GO:0005694,GO:0005856,GO:0005884,GO:0006996,GO:0007010,GO:0007049,GO:0008150,GO:0009987,GO:0015629,GO:0016043,GO:0022402,GO:0031974,GO:0031981,GO:0032991,GO:0035060,GO:0043226,GO:0043227,GO:0043228,GO:0043229,GO:0043231,GO:0043232,GO:0043233,GO:0044422,GO:…	Z
Mj-17217	XP_027222278.1	CCAAT/enhancer-binding protein gamma-like [Penaeus vannamei]	86.13	1e-50	176	#N/A	K
Mj-17224	ROT80902.1	14-3-3-like protein [Penaeus vannamei]	100	3e-89	286	GO:0000003,GO:0000226,GO:0000278,GO:0001709,GO:0001932,GO:0001933,GO:0003006,GO:0003008,GO:0003674,GO:0004857,GO:0004860,GO:0005488,GO:0005515,GO:0005575,GO:0005576,GO:0005622,GO:0005623,GO:0005634,GO:0006457,GO:0006469,GO:0006996,GO:0007010,GO:0007017,GO:0007049,GO:0007059,GO:0007163,GO:0007275,GO:0007276,GO:0007281,GO:0007292,GO:0007293,GO:0007294,GO:0007308,GO:0007309,GO:0007389,GO:0007610,GO:…	O
Mj-17263	ROT77823.1	hemocyte kazal-type proteinase inhibitor [Penaeus vannamei]	65.93	1e-109	341	#N/A	#N/A	crayfish hemocyte marker
Mj-17279	XP_027207148.1	regucalcin-like [Penaeus vannamei]	69.58	4e-164	484	#N/A	PT
Mj-17280	XP_027239156.1	ferritin subunit-like [Penaeus vannamei]	57.81	8e-88	282	GO:0000041,GO:0003674,GO:0005488,GO:0005506,GO:0005575,GO:0005576,GO:0005622,GO:0005623,GO:0005737,GO:0005794,GO:0006810,GO:0006811,GO:0006812,GO:0006826,GO:0006873,GO:0006875,GO:0006879,GO:0006880,GO:0007275,GO:0008043,GO:0008150,GO:0008198,GO:0008283,GO:0009605,GO:0009607,GO:0009620,GO:0009636,GO:0009791,GO:0009987,GO:0010035,GO:0010038,GO:0010039,GO:0012505,GO:0019725,GO:0030001,GO:0030003,GO:…	P
Mj-17302	ROT84737.1	calpain B, partial [Penaeus vannamei]	96.24	0	1285	GO:0000003,GO:0000768,GO:0001667,GO:0002064,GO:0002065,GO:0002066,GO:0003002,GO:0003006,GO:0003674,GO:0003824,GO:0004175,GO:0004197,GO:0004198,GO:0005488,GO:0005509,GO:0005575,GO:0005622,GO:0005623,GO:0005737,GO:0005856,GO:0006355,GO:0006357,GO:0006508,GO:0006807,GO:0006928,GO:0006949,GO:0006950,GO:0006952,GO:0007154,GO:0007165,GO:0007166,GO:0007167,GO:0007178,GO:0007275,GO:0007276,GO:0007281,GO:…	OT
Mj-1731	#N/A	#N/A	#N/A	#N/A	#N/A	#N/A	#N/A
Mj-1737	#N/A	#N/A	#N/A	#N/A	#N/A	#N/A	#N/A
Mj-17401	XP_027216005.1	upstream activation factor subunit spp27-like isoform X3 [Penaeus vannamei]	100	5e-94	297	GO:0000226,GO:0000278,GO:0000280,GO:0005575,GO:0005622,GO:0005623,GO:0005634,GO:0005730,GO:0006996,GO:0007010,GO:0007017,GO:0007049,GO:0007051,GO:0007052,GO:0008150,GO:0009987,GO:0016043,GO:0022402,GO:0022607,GO:0031974,GO:0031981,GO:0043226,GO:0043227,GO:0043228,GO:0043229,GO:0043231,GO:0043232,GO:0043233,GO:0044085,GO:0044422,GO:0044424,GO:0044428,GO:0044446,GO:0044464,GO:0048285,GO:0051225,GO:…	K
Mj-17408	AMO44058.1	stylicin protein [Penaeus japonicus]	100	1e-51	162	#N/A	#N/A	AMPs and lysozyme-related
Mj-17452	ROT61910.1	serine proteinase inhibitor B3 [Penaeus vannamei]	88.66	0	646	GO:0002682,GO:0002683,GO:0003674,GO:0004857,GO:0004866,GO:0004867,GO:0005575,GO:0005576,GO:0005615,GO:0006950,GO:0008150,GO:0009611,GO:0009892,GO:0010466,GO:0010605,GO:0010951,GO:0019222,GO:0030162,GO:0030234,GO:0030414,GO:0031323,GO:0031324,GO:0031347,GO:0031348,GO:0032268,GO:0032269,GO:0035007,GO:0035009,GO:0043086,GO:0043455,GO:0044092,GO:0044421,GO:0045088,GO:0045824,GO:0045861,GO:0048519,GO:…	V
Mj-17470	XP_027220315.1	uncharacterized protein LOC113812605 [Penaeus vannamei]	75	0	636	#N/A	S
Mj-17474	AUB30130.1	cytoplasmic-type actin 2 [Penaeus vannamei]	98.94	0	770	GO:0000228,GO:0000278,GO:0000281,GO:0000785,GO:0000790,GO:0000910,GO:0003674,GO:0005198,GO:0005200,GO:0005575,GO:0005622,GO:0005623,GO:0005634,GO:0005694,GO:0005856,GO:0005884,GO:0006996,GO:0007010,GO:0007049,GO:0008150,GO:0009987,GO:0015629,GO:0016043,GO:0022402,GO:0031974,GO:0031981,GO:0032991,GO:0035060,GO:0043226,GO:0043227,GO:0043228,GO:0043229,GO:0043231,GO:0043232,GO:0043233,GO:0044422,GO:…	Z
Mj-17476	XP_037780069.1	uncharacterized protein LOC119576431 [Penaeus monodon]	88.33	4e-58	184	#N/A	#N/A
Mj-17508	XP_027215908.1	matrix metalloproteinase-14-like [Penaeus vannamei]	84.63	0	891	#N/A	O
Mj-17526	XP_027217179.1	uncharacterized protein LOC113809714 [Penaeus vannamei]	58.67	3e-133	409	#N/A	#N/A
Mj-17586	#N/A	#N/A	#N/A	#N/A	#N/A	#N/A	#N/A
Mj-17587	XP_027220534.1	uncharacterized protein LOC113812816 [Penaeus vannamei]	69.34	0	653	#N/A	#N/A
Mj-17602	ROT74161.1	putative metalloendopeptidase OMA1 [Penaeus vannamei]	47.46	5e-101	320	#N/A	O
Mj-17611	XP_027235551.1	uncharacterized protein LOC113826852 [Penaeus vannamei]	79.72	0	739	#N/A	#N/A
Mj-17619	#N/A	#N/A	#N/A	#N/A	#N/A	#N/A	#N/A
Mj-17637	ROT79514.1	hypothetical protein C7M84_001778 [Penaeus vannamei]	78.29	1e-70	232	#N/A	#N/A
Mj-17639	ROT84794.1	prophenoloxidase activating factor [Penaeus vannamei]	89.89	3e-170	505	#N/A	E	melanization-related
Mj-177	XP_027215792.1	uncharacterized protein LOC113808561 isoform X2 [Penaeus vannamei]	86.78	0	1338	GO:0000003,GO:0000082,GO:0000278,GO:0000902,GO:0000904,GO:0001932,GO:0001934,GO:0002064,GO:0002065,GO:0002066,GO:0003006,GO:0003674,GO:0003824,GO:0004672,GO:0004674,GO:0005575,GO:0005622,GO:0005623,GO:0005634,GO:0005654,GO:0006139,GO:0006259,GO:0006260,GO:0006275,GO:0006277,GO:0006464,GO:0006468,GO:0006725,GO:0006793,GO:0006796,GO:0006807,GO:0006928,GO:0006935,GO:0007049,GO:0007089,GO:0007275,GO:…	DL
Mj-17707	ROT70365.1	Bromodomain-containing protein 8 [Penaeus vannamei]	99.44	9e-123	388	GO:0000123,GO:0000228,GO:0000785,GO:0000790,GO:0000812,GO:0000981,GO:0003674,GO:0003700,GO:0004879,GO:0004887,GO:0005575,GO:0005622,GO:0005623,GO:0005634,GO:0005654,GO:0005694,GO:0005737,GO:0005739,GO:0006325,GO:0006338,GO:0006355,GO:0006357,GO:0006464,GO:0006473,GO:0006475,GO:0006807,GO:0006996,GO:0007154,GO:0007165,GO:0007166,GO:0008150,GO:0008152,GO:0009889,GO:0009891,GO:0009892,GO:0009893,GO:…	K
Mj-17737	#N/A	#N/A	#N/A	#N/A	#N/A	#N/A	#N/A
Mj-17801	#N/A	#N/A	#N/A	#N/A	#N/A	#N/A	#N/A
Mj-17833	ROT79514.1	hypothetical protein C7M84_001778 [Penaeus vannamei]	78.29	7e-71	232	#N/A	#N/A
Mj-17871	XP_027228783.1	uncharacterized protein LOC113820643 [Penaeus vannamei]	61.16	2e-66	223	#N/A	#N/A
Mj-17894	XP_027215532.1	uncharacterized peptidase C1-like protein F26E4.3, partial [Penaeus vannamei]	82.11	0	608	GO:0003674,GO:0005488,GO:0005515,GO:0005575,GO:0005576,GO:0005615,GO:0005623,GO:0007155,GO:0008104,GO:0008150,GO:0009966,GO:0009967,GO:0010646,GO:0010647,GO:0017147,GO:0022610,GO:0023051,GO:0023056,GO:0030111,GO:0030177,GO:0030312,GO:0033036,GO:0035592,GO:0035593,GO:0042600,GO:0044421,GO:0044464,GO:0045184,GO:0048518,GO:0048522,GO:0048583,GO:0048584,GO:0050789,GO:0050794,GO:0051179,GO:0051234,GO:…	S
Mj-17931	ROT62986.1	receptor for activated protein kinase c1 [Penaeus vannamei]	100	0	659	GO:0000003,GO:0000375,GO:0000377,GO:0000398,GO:0001932,GO:0001933,GO:0003006,GO:0005575,GO:0005622,GO:0005623,GO:0005737,GO:0005773,GO:0005776,GO:0005979,GO:0006109,GO:0006139,GO:0006396,GO:0006397,GO:0006725,GO:0006807,GO:0006914,GO:0006950,GO:0006996,GO:0007033,GO:0007154,GO:0007275,GO:0007276,GO:0007281,GO:0007292,GO:0007444,GO:0007610,GO:0007626,GO:0008064,GO:0008150,GO:0008152,GO:0008380,GO:…	T
Mj-17933	XP_027226240.1	uncharacterized protein LOC113818257 [Penaeus vannamei]	84.14	0	751	#N/A	#N/A
Mj-17955	XP_027221660.1	uncharacterized protein LOC113813800 [Penaeus vannamei]	64.18	1e-18	85.9	#N/A	#N/A
Mj-17957	XP_027223730.1	venom carboxylesterase-6-like [Penaeus vannamei]	81.21	3e-170	504	GO:0000003,GO:0003674,GO:0003824,GO:0005575,GO:0005576,GO:0007276,GO:0007292,GO:0007320,GO:0007610,GO:0007617,GO:0007618,GO:0007619,GO:0007620,GO:0008150,GO:0008152,GO:0009056,GO:0009058,GO:0009987,GO:0010817,GO:0016787,GO:0016788,GO:0019098,GO:0019748,GO:0019953,GO:0022414,GO:0030728,GO:0032501,GO:0032504,GO:0034338,GO:0042445,GO:0042446,GO:0042810,GO:0042811,GO:0044237,GO:0044249,GO:0044550,GO:…	G
Mj-17974	ROT83025.1	hypothetical protein C7M84_023806 [Penaeus vannamei]	95.68	0	601	GO:0002181,GO:0003674,GO:0003676,GO:0003723,GO:0003735,GO:0005198,GO:0005488,GO:0005575,GO:0005622,GO:0005623,GO:0005737,GO:0005829,GO:0005840,GO:0006412,GO:0006518,GO:0006807,GO:0008150,GO:0008152,GO:0009058,GO:0009059,GO:0009987,GO:0010467,GO:0015934,GO:0019538,GO:0022625,GO:0022626,GO:0032991,GO:0034641,GO:0034645,GO:0043043,GO:0043170,GO:0043226,GO:0043228,GO:0043229,GO:0043232,GO:0043603,GO:…	J
Mj-1798	ROT70322.1	hypothetical protein C7M84_011422 [Penaeus vannamei]	54.72	3e-85	278	#N/A	#N/A
Mj-18000	XP_027235705.1	SAP30-binding protein-like [Penaeus vannamei]	97.54	1e-167	485	GO:0000375,GO:0000377,GO:0000398,GO:0005575,GO:0005622,GO:0005623,GO:0005634,GO:0005681,GO:0006139,GO:0006396,GO:0006397,GO:0006725,GO:0006807,GO:0008150,GO:0008152,GO:0008380,GO:0009987,GO:0010467,GO:0016070,GO:0016071,GO:0032991,GO:0034641,GO:0043170,GO:0043226,GO:0043227,GO:0043229,GO:0043231,GO:0044237,GO:0044238,GO:0044422,GO:0044424,GO:0044428,GO:0044446,GO:0044464,GO:0046483,GO:0071011,GO:…	K
Mj-18026	#N/A	#N/A	#N/A	#N/A	#N/A	#N/A	#N/A
Mj-18032	#N/A	#N/A	#N/A	#N/A	#N/A	#N/A	#N/A
Mj-18033	XP_027207460.1	innexin inx2-like [Penaeus vannamei]	87	3e-158	463	GO:0000003,GO:0002009,GO:0003006,GO:0003674,GO:0005215,GO:0005243,GO:0005575,GO:0005623,GO:0005886,GO:0005911,GO:0005921,GO:0006810,GO:0007154,GO:0007275,GO:0007276,GO:0007281,GO:0007283,GO:0007292,GO:0007293,GO:0007440,GO:0008150,GO:0008283,GO:0009653,GO:0009790,GO:0009888,GO:0009987,GO:0010496,GO:0015267,GO:0016020,GO:0016021,GO:0016324,GO:0016327,GO:0016331,GO:0019827,GO:0019953,GO:0022412,GO:…	P
Mj-18046	#N/A	#N/A	#N/A	#N/A	#N/A	#N/A	#N/A
Mj-18057	XP_027237901.1	histone deacetylase 3-like [Penaeus vannamei]	99.52	0	821	GO:0001558,GO:0003674,GO:0003824,GO:0004407,GO:0005488,GO:0005515,GO:0005575,GO:0005622,GO:0005623,GO:0005634,GO:0005737,GO:0006325,GO:0006342,GO:0006355,GO:0006464,GO:0006476,GO:0006807,GO:0006996,GO:0007275,GO:0007399,GO:0007406,GO:0008150,GO:0008152,GO:0008285,GO:0009889,GO:0009890,GO:0009892,GO:0009987,GO:0010468,GO:0010556,GO:0010558,GO:0010605,GO:0010629,GO:0010721,GO:0010941,GO:0016043,GO:…	B
Mj-18094	XP_027207148.1	regucalcin-like [Penaeus vannamei]	68.27	3e-130	390	#N/A	PT
Mj-18095	ROT83878.1	ribosomal protein L12 [Penaeus vannamei]	98.04	1e-98	302	GO:0000027,GO:0000184,GO:0000381,GO:0000956,GO:0002181,GO:0003674,GO:0003676,GO:0003723,GO:0003735,GO:0005198,GO:0005488,GO:0005575,GO:0005622,GO:0005623,GO:0005634,GO:0005730,GO:0005737,GO:0005829,GO:0005840,GO:0006139,GO:0006401,GO:0006402,GO:0006412,GO:0006413,GO:0006417,GO:0006448,GO:0006518,GO:0006605,GO:0006612,GO:0006613,GO:0006614,GO:0006725,GO:0006807,GO:0006810,GO:0006886,GO:0006996,GO:…	J
Mj-18098	XP_027218317.1	tetraspanin-1-like [Penaeus vannamei]	82.08	8e-129	389	GO:0005575,GO:0005623,GO:0005886,GO:0005887,GO:0007154,GO:0007165,GO:0007166,GO:0008150,GO:0009987,GO:0016020,GO:0016021,GO:0023052,GO:0031224,GO:0031226,GO:0044425,GO:0044459,GO:0044464,GO:0050789,GO:0050794,GO:0050896,GO:0051716,GO:0065007,GO:0071944	S
Mj-18145	ROT76728.1	hypothetical protein C7M84_004685 [Penaeus vannamei]	71.43	3e-23	100	#N/A	#N/A
Mj-18164	XP_027228708.1	uncharacterized protein LOC113820575 [Penaeus vannamei]	77.97	8e-25	103	#N/A	#N/A
Mj-18184	ROT65943.1	hypothetical protein C7M84_016070 [Penaeus vannamei]	46.37	2e-51	187	#N/A	#N/A
Mj-18199	XP_027216086.1	uncharacterized protein LOC113808796 [Penaeus vannamei]	53.85	8e-08	53.1	#N/A	#N/A
Mj-18207	ROT83878.1	ribosomal protein L12 [Penaeus vannamei]	98.18	5e-109	328	GO:0000027,GO:0002181,GO:0003674,GO:0003676,GO:0003723,GO:0003735,GO:0005198,GO:0005488,GO:0005575,GO:0005622,GO:0005623,GO:0005737,GO:0005829,GO:0005840,GO:0006412,GO:0006518,GO:0006807,GO:0006996,GO:0008150,GO:0008152,GO:0009058,GO:0009059,GO:0009987,GO:0010467,GO:0015934,GO:0016043,GO:0019538,GO:0019843,GO:0022607,GO:0022613,GO:0022618,GO:0022625,GO:0022626,GO:0032991,GO:0034622,GO:0034641,GO:…	J
Mj-18245	AMH87234.1	penaeidin-II [Penaeus japonicus]	95.83	2e-20	90.5	GO:0005575,GO:0005622,GO:0005623,GO:0005737,GO:0005856,GO:0005874,GO:0005879,GO:0005881,GO:0005929,GO:0005930,GO:0015630,GO:0032838,GO:0042995,GO:0043226,GO:0043228,GO:0043229,GO:0043232,GO:0044422,GO:0044424,GO:0044430,GO:0044441,GO:0044444,GO:0044446,GO:0044447,GO:0044463,GO:0044464,GO:0097014,GO:0099080,GO:0099081,GO:0099512,GO:0099513,GO:0099568,GO:0120025,GO:0120038	Z	AMPs and lysozyme-related
Mj-18273	BAD36808.1	transglutaminase, partial [Penaeus japonicus]	100	8e-175	518	#N/A	S	clotting-related
Mj-18274	XP_037780920.1	uncharacterized protein LOC119577246 [Penaeus monodon]	55.99	1e-113	346	#N/A	#N/A
Mj-18293	ROT75943.1	hypothetical protein C7M84_005490 [Penaeus vannamei]	39.75	2e-41	154	#N/A	#N/A
Mj-18297	#N/A	#N/A	#N/A	#N/A	#N/A	#N/A	#N/A
Mj-1830	XP_027230421.1	cyclin-L2-like [Penaeus vannamei]	98.77	0	630	GO:0000079,GO:0000307,GO:0001932,GO:0001934,GO:0003674,GO:0005575,GO:0005622,GO:0005623,GO:0005634,GO:0006355,GO:0006357,GO:0008150,GO:0009889,GO:0009891,GO:0009893,GO:0010468,GO:0010556,GO:0010557,GO:0010562,GO:0010604,GO:0010628,GO:0016538,GO:0019207,GO:0019219,GO:0019220,GO:0019222,GO:0019887,GO:0030234,GO:0031323,GO:0031325,GO:0031326,GO:0031328,GO:0031399,GO:0031401,GO:0032268,GO:0032270,GO:…	D
Mj-18300	ROT70331.1	hypothetical protein C7M84_011381 [Penaeus vannamei]	36.61	2e-09	58.9	#N/A	#N/A
Mj-18305	ROT77823.1	hemocyte kazal-type proteinase inhibitor [Penaeus vannamei]	65.93	8e-113	341	#N/A	#N/A	crayfish hemocyte marker
Mj-18335	XP_027234608.1	uncharacterized protein LOC113825948 [Penaeus vannamei]	87.94	7e-33	124	#N/A	#N/A
Mj-18340	ROT77823.1	hemocyte kazal-type proteinase inhibitor [Penaeus vannamei]	63.94	4e-106	323	#N/A	#N/A	crayfish hemocyte marker
Mj-18348	#N/A	#N/A	#N/A	#N/A	#N/A	#N/A	#N/A
Mj-18353	XP_027216086.1	uncharacterized protein LOC113808796 [Penaeus vannamei]	53.49	9e-14	70.5	#N/A	#N/A
Mj-18360	XP_027210484.1	LOW QUALITY PROTEIN: ovoinhibitor-like [Penaeus vannamei]	72.61	3e-105	320	#N/A	#N/A
Mj-18369	ROT76728.1	hypothetical protein C7M84_004685 [Penaeus vannamei]	71.43	6e-23	100	#N/A	#N/A
Mj-18383	XP_027235484.1	uncharacterized protein LOC113826797 [Penaeus vannamei]	79.81	2e-112	344	#N/A	#N/A
Mj-18407	XP_027232619.1	innexin inx2-like isoform X1 [Penaeus vannamei]	50.96	3e-135	404	#N/A	P
Mj-18414	XP_027207148.1	regucalcin-like [Penaeus vannamei]	71.34	9e-103	247	#N/A	PT
Mj-1842	ROT73167.1	Ras suppressor protein 1 [Penaeus vannamei]	98.91	7e-164	480	GO:0001932,GO:0001933,GO:0002009,GO:0002165,GO:0006469,GO:0007154,GO:0007165,GO:0007166,GO:0007229,GO:0007275,GO:0007444,GO:0007472,GO:0007475,GO:0007476,GO:0007552,GO:0007560,GO:0008150,GO:0008587,GO:0009653,GO:0009791,GO:0009886,GO:0009887,GO:0009888,GO:0009892,GO:0009966,GO:0009968,GO:0009987,GO:0010563,GO:0010605,GO:0010646,GO:0010648,GO:0019220,GO:0019222,GO:0023051,GO:0023052,GO:0023057,GO:…	T
Mj-18442	XP_027216241.1	uncharacterized protein LOC113808957 [Penaeus vannamei]	76.34	1e-105	324	GO:0002376,GO:0003674,GO:0005488,GO:0005515,GO:0005575,GO:0005576,GO:0006950,GO:0006952,GO:0006955,GO:0006959,GO:0007599,GO:0008150,GO:0009611,GO:0032501,GO:0042060,GO:0042381,GO:0042802,GO:0042803,GO:0045087,GO:0046983,GO:0050817,GO:0050878,GO:0050896,GO:0065007,GO:0065008	VW
Mj-18470	XP_027219702.1	cysteine-rich motor neuron 1 protein-like [Penaeus vannamei]	81.16	2e-17	81.3	#N/A	#N/A
Mj-18475	ROT76728.1	hypothetical protein C7M84_004685 [Penaeus vannamei]	71.43	5e-23	100	#N/A	#N/A
Mj-18497	ROT70434.1	hypothetical protein C7M84_011283 [Penaeus vannamei]	92.9	0	645	#N/A	C
Mj-185	XP_027228107.1	F-box only protein 11-like [Penaeus vannamei]	93.88	0	1755	GO:0000151,GO:0005575,GO:0005622,GO:0005623,GO:0005737,GO:0006325,GO:0006342,GO:0006355,GO:0006508,GO:0006511,GO:0006807,GO:0006996,GO:0008150,GO:0008152,GO:0009056,GO:0009057,GO:0009889,GO:0009890,GO:0009892,GO:0009987,GO:0010468,GO:0010498,GO:0010556,GO:0010558,GO:0010605,GO:0010629,GO:0016043,GO:0016458,GO:0019005,GO:0019219,GO:0019222,GO:0019538,GO:0019941,GO:0022607,GO:0022613,GO:0022618,GO:…	I
Mj-18535	XP_027225792.1	uncharacterized protein LOC113817878 [Penaeus vannamei]	76.15	1e-45	161	#N/A	#N/A
Mj-18539	XP_027233390.1	60S ribosomal protein L22-like [Penaeus vannamei]	98.39	5e-64	221	GO:0002181,GO:0003674,GO:0003676,GO:0003723,GO:0003735,GO:0005198,GO:0005488,GO:0005575,GO:0005622,GO:0005623,GO:0005737,GO:0005829,GO:0005840,GO:0006412,GO:0006518,GO:0006807,GO:0008150,GO:0008152,GO:0009058,GO:0009059,GO:0009987,GO:0010467,GO:0015934,GO:0019538,GO:0022625,GO:0022626,GO:0032991,GO:0034641,GO:0034645,GO:0043043,GO:0043170,GO:0043226,GO:0043228,GO:0043229,GO:0043232,GO:0043603,GO:…	J
Mj-18540	#N/A	#N/A	#N/A	#N/A	#N/A	#N/A	#N/A
Mj-1856	BAC57467.1	c-type lysozyme [Penaeus japonicus]	100	8e-85	270	GO:0000137,GO:0003674,GO:0003796,GO:0003824,GO:0004553,GO:0005488,GO:0005515,GO:0005575,GO:0005576,GO:0005615,GO:0005622,GO:0005623,GO:0005737,GO:0005783,GO:0005788,GO:0005791,GO:0005794,GO:0005795,GO:0005798,GO:0005902,GO:0006950,GO:0006952,GO:0008150,GO:0008152,GO:0009056,GO:0009605,GO:0009607,GO:0009617,GO:0009987,GO:0012505,GO:0016787,GO:0016798,GO:0016998,GO:0030133,GO:0030135,GO:0030136,GO:…	G	AMPs and lysozyme-related
Mj-18563	#N/A	#N/A	#N/A	#N/A	#N/A	#N/A	#N/A
Mj-18575	ROT65818.1	putative anamorsin isoform X1 [Penaeus vannamei]	90.29	6e-165	472	GO:0000003,GO:0002064,GO:0002065,GO:0002066,GO:0002376,GO:0002520,GO:0003006,GO:0003674,GO:0005488,GO:0005575,GO:0005622,GO:0005623,GO:0005634,GO:0005654,GO:0005730,GO:0005737,GO:0005739,GO:0006790,GO:0007275,GO:0007276,GO:0007281,GO:0007292,GO:0008150,GO:0008152,GO:0009888,GO:0009987,GO:0010941,GO:0016043,GO:0016226,GO:0019953,GO:0022412,GO:0022414,GO:0022607,GO:0030097,GO:0030154,GO:0030707,GO:…	S
Mj-1860	ABK76338.1	heat shock protein 70 [Penaeus japonicus]	99.84	0	1176	#N/A	O
Mj-18601	ROT79782.1	hypothetical protein C7M84_001491 [Penaeus vannamei]	83.06	7e-18	88.2	#N/A	#N/A
Mj-18608	#N/A	#N/A	#N/A	#N/A	#N/A	#N/A	#N/A
Mj-18644	ROT65306.1	putative polypyrimidine tract-binding protein 1 isoform X1 [Penaeus vannamei]	87.92	2e-168	496	#N/A	A
Mj-18668	BAB85575.1	cyclic AMP-regulated protein like protein, partial [Penaeus japonicus]	97.39	1e-100	303	#N/A	Z
Mj-18696	#N/A	#N/A	#N/A	#N/A	#N/A	#N/A	#N/A
Mj-1870	XP_027226055.1	protein split ends-like [Penaeus vannamei]	58.65	3e-46	168	#N/A	#N/A
Mj-18702	AEK78307.1	adenine nucleotide translocase 2 [Penaeus vannamei]	98.38	0	591	GO:0000003,GO:0000295,GO:0001508,GO:0003006,GO:0003254,GO:0003674,GO:0005215,GO:0005346,GO:0005347,GO:0005471,GO:0005575,GO:0005622,GO:0005623,GO:0005737,GO:0005739,GO:0005740,GO:0005743,GO:0006140,GO:0006810,GO:0006811,GO:0006820,GO:0006839,GO:0006855,GO:0006862,GO:0006873,GO:0006874,GO:0006875,GO:0006950,GO:0006979,GO:0006996,GO:0007005,GO:0007006,GO:0007154,GO:0007267,GO:0007268,GO:0007275,GO:…	C
Mj-18708	ROT76246.1	putative ribosomal protein L19e [Penaeus vannamei]	100	5e-95	289	GO:0002181,GO:0003674,GO:0003676,GO:0003723,GO:0003735,GO:0005198,GO:0005488,GO:0005575,GO:0005622,GO:0005623,GO:0005737,GO:0005829,GO:0005840,GO:0006412,GO:0006518,GO:0006807,GO:0008150,GO:0008152,GO:0009058,GO:0009059,GO:0009987,GO:0010467,GO:0015934,GO:0019538,GO:0022625,GO:0022626,GO:0032991,GO:0034641,GO:0034645,GO:0043043,GO:0043170,GO:0043226,GO:0043228,GO:0043229,GO:0043232,GO:0043603,GO:…	J
Mj-1871	XP_027227809.1	GSK-3-binding protein-like [Penaeus vannamei]	100	1e-74	243	#N/A	S
Mj-18710	XP_027229508.1	40S ribosomal protein S24-like isoform X1 [Penaeus vannamei]	92.31	9e-78	243	GO:0000462,GO:0002181,GO:0003674,GO:0003735,GO:0005198,GO:0005575,GO:0005622,GO:0005623,GO:0005737,GO:0005829,GO:0005840,GO:0006139,GO:0006364,GO:0006396,GO:0006412,GO:0006518,GO:0006725,GO:0006807,GO:0008150,GO:0008152,GO:0009058,GO:0009059,GO:0009987,GO:0010467,GO:0015935,GO:0016070,GO:0016072,GO:0019538,GO:0022613,GO:0022626,GO:0022627,GO:0030490,GO:0032991,GO:0034470,GO:0034641,GO:0034645,GO:…	J
Mj-18731	#N/A	#N/A	#N/A	#N/A	#N/A	#N/A	#N/A
Mj-18739	#N/A	#N/A	#N/A	#N/A	#N/A	#N/A	#N/A
Mj-18742	#N/A	#N/A	#N/A	#N/A	#N/A	#N/A	#N/A
Mj-18786	AYN64330.1	thymosin 4 [Penaeus japonicus]	98.36	2e-76	240	#N/A	#N/A
Mj-18821	ABN04203.1	ribosomal protein L26 [Penaeus vannamei]	97.48	3e-76	238	GO:0002181,GO:0003674,GO:0003676,GO:0003723,GO:0003735,GO:0005198,GO:0005488,GO:0005575,GO:0005622,GO:0005623,GO:0005737,GO:0005829,GO:0005840,GO:0006412,GO:0006518,GO:0006807,GO:0008150,GO:0008152,GO:0009058,GO:0009059,GO:0009987,GO:0010467,GO:0015934,GO:0019538,GO:0022613,GO:0022625,GO:0022626,GO:0032991,GO:0034641,GO:0034645,GO:0042254,GO:0042273,GO:0043043,GO:0043170,GO:0043226,GO:0043228,GO:…	J
Mj-18830	ROT79075.1	hypothetical protein C7M84_002203 [Penaeus vannamei]	80.75	9e-105	254	#N/A	S
Mj-18834	ROT71631.1	hypothetical protein C7M84_010044 [Penaeus vannamei]	59.23	6e-39	142	#N/A	#N/A
Mj-18851	XP_027216241.1	uncharacterized protein LOC113808957 [Penaeus vannamei]	77.16	2e-152	441	GO:0002376,GO:0003674,GO:0005488,GO:0005515,GO:0005575,GO:0005576,GO:0006950,GO:0006952,GO:0006955,GO:0006959,GO:0007599,GO:0008150,GO:0009611,GO:0032501,GO:0042060,GO:0042381,GO:0042802,GO:0042803,GO:0045087,GO:0046983,GO:0050817,GO:0050878,GO:0050896,GO:0065007,GO:0065008	T
Mj-18900	ROT67304.1	PDGF/VEGF-related factor 1 [Penaeus vannamei]	60.45	5e-51	173	#N/A	#N/A	cell growth-related
Mj-18958	BBC20610.1	hypothetical protein [Penaeus japonicus]	96.6	2e-81	251	#N/A	#N/A
Mj-18971	#N/A	#N/A	#N/A	#N/A	#N/A	#N/A	#N/A
Mj-18974	ROT78162.1	Gamma-interferon-inducible lysosomal thiol reductase [Penaeus vannamei]	82.38	2e-115	341	GO:0000375,GO:0000377,GO:0000398,GO:0003674,GO:0005488,GO:0005515,GO:0005575,GO:0006139,GO:0006396,GO:0006397,GO:0006725,GO:0006807,GO:0007346,GO:0008150,GO:0008152,GO:0008380,GO:0009987,GO:0010389,GO:0010467,GO:0010564,GO:0016070,GO:0016071,GO:0032991,GO:0034641,GO:0043170,GO:0044237,GO:0044238,GO:0046483,GO:0050789,GO:0050794,GO:0051726,GO:0065007,GO:0071704,GO:0090304,GO:1901360,GO:1901987,GO:…	Z
Mj-18975	ROT78162.1	Gamma-interferon-inducible lysosomal thiol reductase [Penaeus vannamei]	81.87	5e-115	339	GO:0000375,GO:0000377,GO:0000398,GO:0003674,GO:0005488,GO:0005515,GO:0005575,GO:0006139,GO:0006396,GO:0006397,GO:0006725,GO:0006807,GO:0007346,GO:0008150,GO:0008152,GO:0008380,GO:0009987,GO:0010389,GO:0010467,GO:0010564,GO:0016070,GO:0016071,GO:0032991,GO:0034641,GO:0043170,GO:0044237,GO:0044238,GO:0046483,GO:0050789,GO:0050794,GO:0051726,GO:0065007,GO:0071704,GO:0090304,GO:1901360,GO:1901987,GO:…	Z
Mj-1898	ROT66591.1	putative poly(U)-specific endoribonuclease-like [Penaeus vannamei]	81.78	2e-158	468	GO:0003674,GO:0003676,GO:0003723,GO:0003824,GO:0004518,GO:0004519,GO:0004521,GO:0004540,GO:0005488,GO:0006139,GO:0006725,GO:0006807,GO:0008150,GO:0008152,GO:0009987,GO:0016070,GO:0016787,GO:0016788,GO:0034641,GO:0043170,GO:0044237,GO:0044238,GO:0046483,GO:0071704,GO:0090304,GO:0090305,GO:0090501,GO:0090502,GO:0097159,GO:0140098,GO:1901360,GO:1901363	G
Mj-1899	XP_027220732.1	LOW QUALITY PROTEIN: tRNA selenocysteine 1-associated protein 1-like [Penaeus vannamei]	98.57	0	538	#N/A	A
Mj-19020	#N/A	#N/A	#N/A	#N/A	#N/A	#N/A	#N/A
Mj-19051	#N/A	#N/A	#N/A	#N/A	#N/A	#N/A	#N/A
Mj-19053	ROT73884.1	putative neurofilament heavy polypeptide [Penaeus vannamei]	93.13	1e-80	250	GO:0000027,GO:0002181,GO:0003674,GO:0003676,GO:0003723,GO:0003735,GO:0005198,GO:0005488,GO:0005575,GO:0005622,GO:0005623,GO:0005737,GO:0005829,GO:0005840,GO:0006412,GO:0006518,GO:0006807,GO:0006996,GO:0008150,GO:0008152,GO:0009058,GO:0009059,GO:0009987,GO:0010467,GO:0015934,GO:0016043,GO:0019538,GO:0022607,GO:0022613,GO:0022618,GO:0022625,GO:0022626,GO:0032991,GO:0034622,GO:0034641,GO:0034645,GO:…	J
Mj-19067	ABW88999.1	double WAP domain-containing protein [Penaeus japonicus]	100	4e-57	186	#N/A	#N/A	AMPs and lysozyme-related
Mj-19071	ROT60631.1	ribosomal protein S8 [Penaeus vannamei]	94.5	6e-129	374	GO:0000462,GO:0002164,GO:0002181,GO:0002376,GO:0002520,GO:0003674,GO:0003735,GO:0005198,GO:0005575,GO:0005622,GO:0005623,GO:0005737,GO:0005829,GO:0005840,GO:0006139,GO:0006364,GO:0006396,GO:0006412,GO:0006518,GO:0006725,GO:0006807,GO:0007275,GO:0008150,GO:0008152,GO:0009058,GO:0009059,GO:0009791,GO:0009987,GO:0010467,GO:0015935,GO:0016070,GO:0016072,GO:0019538,GO:0022613,GO:0022626,GO:0022627,GO:…	J
Mj-19140	ROT77400.1	ribosomal protein S6 [Penaeus vannamei]	95.79	1e-122	362	GO:0002181,GO:0002376,GO:0003674,GO:0003735,GO:0005198,GO:0005575,GO:0005622,GO:0005623,GO:0005737,GO:0005829,GO:0005840,GO:0006139,GO:0006364,GO:0006396,GO:0006412,GO:0006518,GO:0006725,GO:0006807,GO:0006955,GO:0008150,GO:0008152,GO:0009058,GO:0009059,GO:0009987,GO:0010467,GO:0015935,GO:0016070,GO:0016072,GO:0019538,GO:0022613,GO:0022626,GO:0022627,GO:0032991,GO:0034470,GO:0034641,GO:0034645,GO:…	J
Mj-19166	ROT70331.1	hypothetical protein C7M84_011381 [Penaeus vannamei]	37.02	4e-15	74.7	#N/A	#N/A
Mj-1917	XP_027214939.1	myotubularin-related protein 2-like isoform X1 [Penaeus vannamei]	98.46	0	1164	GO:0000278,GO:0003674,GO:0003824,GO:0004438,GO:0004721,GO:0005488,GO:0005515,GO:0005575,GO:0005622,GO:0005623,GO:0005737,GO:0005938,GO:0006464,GO:0006470,GO:0006793,GO:0006796,GO:0006807,GO:0006810,GO:0006950,GO:0006996,GO:0007010,GO:0007049,GO:0007059,GO:0008138,GO:0008150,GO:0008152,GO:0009611,GO:0009987,GO:0016020,GO:0016043,GO:0016192,GO:0016197,GO:0016311,GO:0016787,GO:0016788,GO:0016791,GO:…	IU
Mj-19196	#N/A	#N/A	#N/A	#N/A	#N/A	#N/A	#N/A
Mj-192	ROT70351.1	putative histone-lysine N-methyltransferase NSD2-like [Penaeus vannamei]	92.6	0	3281	GO:0000003,GO:0000018,GO:0000122,GO:0000228,GO:0000726,GO:0000775,GO:0000785,GO:0000792,GO:0000803,GO:0000805,GO:0000981,GO:0001501,GO:0002637,GO:0002639,GO:0002682,GO:0002684,GO:0002694,GO:0002696,GO:0002697,GO:0002699,GO:0002700,GO:0002702,GO:0002703,GO:0002705,GO:0002706,GO:0002708,GO:0002712,GO:0002714,GO:0002819,GO:0002821,GO:0002822,GO:0002824,GO:0002889,GO:0002891,GO:0003006,GO:0003007,GO:…	K
Mj-19206	XP_027219293.1	insulin-like growth factor-binding protein 4 [Penaeus vannamei]	42.79	2e-47	164	#N/A	S	cell growth-related
Mj-19212	XP_027219702.1	cysteine-rich motor neuron 1 protein-like [Penaeus vannamei]	82.69	1e-40	142	#N/A	#N/A
Mj-19234	ROT72202.1	ribosomal protein S11 [Penaeus vannamei]	98.69	1e-105	311	GO:0002181,GO:0003674,GO:0003735,GO:0005198,GO:0005575,GO:0005622,GO:0005623,GO:0005634,GO:0005730,GO:0005737,GO:0005829,GO:0005840,GO:0006412,GO:0006518,GO:0006807,GO:0008150,GO:0008152,GO:0009058,GO:0009059,GO:0009987,GO:0010467,GO:0015935,GO:0019538,GO:0022626,GO:0022627,GO:0031974,GO:0031981,GO:0032991,GO:0034641,GO:0034645,GO:0043043,GO:0043170,GO:0043226,GO:0043227,GO:0043228,GO:0043229,GO:…	J
Mj-1925	#N/A	#N/A	#N/A	#N/A	#N/A	#N/A	#N/A
Mj-19272	XP_027225284.1	uncharacterized protein LOC113817419 [Penaeus vannamei]	92.41	5e-104	333	#N/A	#N/A
Mj-19279	XP_027236339.1	uncharacterized protein LOC113827641 [Penaeus vannamei]	67.14	2e-25	100	#N/A	#N/A
Mj-19281	AMH87234.1	penaeidin-II [Penaeus japonicus]	100	2e-32	121	#N/A	#N/A	AMPs and lysozyme-related
Mj-19309	XP_027214423.1	superoxide dismutase [Cu-Zn]-like [Penaeus vannamei]	89.78	5e-132	380	GO:0000302,GO:0000303,GO:0000305,GO:0001306,GO:0003674,GO:0003824,GO:0004784,GO:0005488,GO:0005507,GO:0005515,GO:0005575,GO:0005576,GO:0005615,GO:0005622,GO:0005623,GO:0005737,GO:0005777,GO:0006801,GO:0006950,GO:0006979,GO:0007275,GO:0007568,GO:0007571,GO:0008150,GO:0008152,GO:0008270,GO:0008340,GO:0009636,GO:0009894,GO:0009987,GO:0010035,GO:0010259,GO:0010506,GO:0010821,GO:0016209,GO:0016491,GO:…	P	crayfish hemocyte marker
Mj-19322	ANA91278.1	ALF-A1 [Penaeus japonicus]	94.74	8e-101	298	#N/A	J	AMPs and lysozyme-related
Mj-1933	XP_027232002.1	vacuolar protein sorting-associated protein 33A-like [Penaeus vannamei]	96.98	0	1162	#N/A	U
Mj-19338	ABW88999.1	double WAP domain-containing protein [Penaeus japonicus]	95.56	2e-22	92.8	#N/A	#N/A	AMPs and lysozyme-related
Mj-19350	#N/A	#N/A	#N/A	#N/A	#N/A	#N/A	#N/A
Mj-19371	#N/A	#N/A	#N/A	#N/A	#N/A	#N/A	#N/A
Mj-19378	AOC37840.1	profilin, partial [Penaeus vannamei]	74.19	2e-25	101	#N/A	Z
Mj-19396	XP_027234863.1	nascent polypeptide-associated complex subunit alpha-like [Penaeus vannamei]	98.56	6e-109	320	GO:0000003,GO:0003006,GO:0003674,GO:0005488,GO:0005515,GO:0007276,GO:0007281,GO:0007292,GO:0008150,GO:0009987,GO:0019953,GO:0022412,GO:0022414,GO:0030154,GO:0032501,GO:0032502,GO:0032504,GO:0044703,GO:0048468,GO:0048477,GO:0048609,GO:0048856,GO:0048869,GO:0051704	K
Mj-19399	AAR82846.1	actin E, partial [Penaeus vannamei]	100	1e-174	488	GO:0000003,GO:0000228,GO:0000278,GO:0000281,GO:0000785,GO:0000790,GO:0000910,GO:0003006,GO:0003674,GO:0005198,GO:0005200,GO:0005575,GO:0005622,GO:0005623,GO:0005634,GO:0005694,GO:0005856,GO:0005884,GO:0006325,GO:0006338,GO:0006996,GO:0007010,GO:0007049,GO:0007275,GO:0007276,GO:0007281,GO:0007283,GO:0007286,GO:0007291,GO:0007349,GO:0008104,GO:0008150,GO:0009653,GO:0009987,GO:0015629,GO:0016043,GO:…	Z
Mj-19401	#N/A	#N/A	#N/A	#N/A	#N/A	#N/A	#N/A
Mj-19418	BBC20610.1	hypothetical protein [Penaeus japonicus]	94.41	4e-76	234	#N/A	#N/A
Mj-19467	XP_027219293.1	insulin-like growth factor-binding protein 4 [Penaeus vannamei]	43.31	9e-35	129	#N/A	S	cell growth-related
Mj-19491	ROT77258.1	hypothetical protein C7M84_004115 [Penaeus vannamei]	82.91	8e-54	175	#N/A	#N/A
Mj-19495	#N/A	#N/A	#N/A	#N/A	#N/A	#N/A	#N/A
Mj-1951	XP_027216183.1	ubiquitin-conjugating enzyme E2 variant 2-like [Penaeus vannamei]	100	1e-90	286	#N/A	O
Mj-19535	BBC20610.1	hypothetical protein [Penaeus japonicus]	77.4	6e-59	189	#N/A	#N/A
Mj-19538	XP_027218352.1	shematrin-like protein 2 [Penaeus vannamei]	72.92	1e-19	84.7	#N/A	#N/A
Mj-19542	XP_027222071.1	uncharacterized protein LOC113814237 [Penaeus vannamei]	73.48	6e-53	176	#N/A	#N/A
Mj-19551	ROT77259.1	hypothetical protein C7M84_004116 [Penaeus vannamei]	83.78	1e-62	197	#N/A	#N/A
Mj-19599	XP_027236339.1	uncharacterized protein LOC113827641 [Penaeus vannamei]	67.14	1e-25	100	#N/A	#N/A
Mj-19602	XP_027210484.1	LOW QUALITY PROTEIN: ovoinhibitor-like [Penaeus vannamei]	66.33	6e-38	137	#N/A	S
Mj-19606	XP_027209168.1	venom protein 302-like [Penaeus vannamei]	74.24	8e-26	101	#N/A	S
Mj-19612	XP_027232210.1	gamma-interferon-inducible lysosomal thiol reductase-like [Penaeus vannamei]	82.04	2e-124	358	GO:0000375,GO:0000377,GO:0000398,GO:0003674,GO:0005488,GO:0005515,GO:0005575,GO:0006139,GO:0006396,GO:0006397,GO:0006725,GO:0006807,GO:0007346,GO:0008150,GO:0008152,GO:0008380,GO:0009987,GO:0010389,GO:0010467,GO:0010564,GO:0016070,GO:0016071,GO:0032991,GO:0034641,GO:0043170,GO:0044237,GO:0044238,GO:0046483,GO:0050789,GO:0050794,GO:0051726,GO:0065007,GO:0071704,GO:0090304,GO:1901360,GO:1901987,GO:…	Z
Mj-19617	XP_027209168.1	venom protein 302-like [Penaeus vannamei]	74.24	8e-26	101	#N/A	S
Mj-19618	XP_027209168.1	venom protein 302-like [Penaeus vannamei]	74.24	8e-26	101	#N/A	S
Mj-19648	ROT77258.1	hypothetical protein C7M84_004115 [Penaeus vannamei]	82.91	3e-54	175	#N/A	#N/A
Mj-19720	#N/A	#N/A	#N/A	#N/A	#N/A	#N/A	#N/A
Mj-19722	#N/A	#N/A	#N/A	#N/A	#N/A	#N/A	#N/A
Mj-19726	#N/A	#N/A	#N/A	#N/A	#N/A	#N/A	#N/A
Mj-1973	XP_027208508.1	late cornified envelope-like proline-rich protein 1 [Penaeus vannamei]	67.65	1e-07	48.1	#N/A	#N/A
Mj-19740	BBC20610.1	hypothetical protein [Penaeus japonicus]	95.92	3e-83	250	#N/A	#N/A
Mj-19757	AVG44186.1	crustin-like protein [Penaeus japonicus]	97.62	7e-55	178	#N/A	#N/A	AMPs and lysozyme-related
Mj-19759	ROT85761.1	ribosomal protein L13 [Penaeus vannamei]	92.89	3e-113	329	GO:0002181,GO:0003674,GO:0003676,GO:0003723,GO:0003735,GO:0005198,GO:0005488,GO:0005575,GO:0005622,GO:0005623,GO:0005737,GO:0005829,GO:0005840,GO:0006412,GO:0006518,GO:0006807,GO:0008150,GO:0008152,GO:0009058,GO:0009059,GO:0009987,GO:0010467,GO:0015934,GO:0019538,GO:0022625,GO:0022626,GO:0032991,GO:0034641,GO:0034645,GO:0043043,GO:0043170,GO:0043226,GO:0043228,GO:0043229,GO:0043232,GO:0043603,GO:…	J
Mj-19761	XP_027219702.1	cysteine-rich motor neuron 1 protein-like [Penaeus vannamei]	82.52	1e-40	140	#N/A	#N/A
Mj-19793	XP_027219293.1	insulin-like growth factor-binding protein 4 [Penaeus vannamei]	39.9	4e-36	131	#N/A	S	cell growth-related
Mj-19850	#N/A	#N/A	#N/A	#N/A	#N/A	#N/A	#N/A
Mj-19868	ROT66292.1	60s ribosomal protein l27a [Penaeus vannamei]	93.88	1e-81	245	GO:0002181,GO:0003674,GO:0003676,GO:0003723,GO:0003735,GO:0005198,GO:0005488,GO:0005575,GO:0005622,GO:0005623,GO:0005737,GO:0005829,GO:0005840,GO:0006412,GO:0006518,GO:0006807,GO:0008150,GO:0008152,GO:0009058,GO:0009059,GO:0009987,GO:0010467,GO:0015934,GO:0019538,GO:0022625,GO:0022626,GO:0032991,GO:0034641,GO:0034645,GO:0043043,GO:0043170,GO:0043226,GO:0043228,GO:0043229,GO:0043232,GO:0043603,GO:…	J
Mj-19896	#N/A	#N/A	#N/A	#N/A	#N/A	#N/A	#N/A
Mj-19904	#N/A	#N/A	#N/A	#N/A	#N/A	#N/A	#N/A
Mj-19949	XP_027211822.1	40S ribosomal protein S12-like [Penaeus vannamei]	99.28	1e-96	283	#N/A	J
Mj-19953	ROT75919.1	ribosomal protein L17 [Penaeus vannamei]	99.46	4e-115	331	GO:0002181,GO:0003674,GO:0003735,GO:0005198,GO:0005575,GO:0005622,GO:0005623,GO:0005737,GO:0005829,GO:0005840,GO:0006412,GO:0006518,GO:0006807,GO:0008150,GO:0008152,GO:0009058,GO:0009059,GO:0009987,GO:0010467,GO:0015934,GO:0019538,GO:0022625,GO:0022626,GO:0032991,GO:0034641,GO:0034645,GO:0043043,GO:0043170,GO:0043226,GO:0043228,GO:0043229,GO:0043232,GO:0043603,GO:0043604,GO:0044237,GO:0044238,GO:…	J
Mj-19978	#N/A	#N/A	#N/A	#N/A	#N/A	#N/A	#N/A
Mj-19981	ROT74290.1	60S ribosomal protein L21 [Penaeus vannamei]	93.87	3e-109	315	GO:0002181,GO:0003674,GO:0003735,GO:0005198,GO:0005575,GO:0005622,GO:0005623,GO:0005737,GO:0005829,GO:0005840,GO:0006412,GO:0006518,GO:0006807,GO:0008150,GO:0008152,GO:0009058,GO:0009059,GO:0009987,GO:0010467,GO:0015934,GO:0019538,GO:0022625,GO:0022626,GO:0032991,GO:0034641,GO:0034645,GO:0043043,GO:0043170,GO:0043226,GO:0043228,GO:0043229,GO:0043232,GO:0043603,GO:0043604,GO:0044237,GO:0044238,GO:…	J
Mj-20025	ROT80897.1	S10e ribosomal protein [Penaeus vannamei]	97.81	6e-94	276	GO:0000028,GO:0002181,GO:0003674,GO:0003676,GO:0003723,GO:0003735,GO:0005198,GO:0005488,GO:0005575,GO:0005622,GO:0005623,GO:0005737,GO:0005829,GO:0005840,GO:0006412,GO:0006518,GO:0006807,GO:0006996,GO:0008150,GO:0008152,GO:0009058,GO:0009059,GO:0009987,GO:0010467,GO:0015935,GO:0016043,GO:0019538,GO:0022607,GO:0022613,GO:0022618,GO:0022626,GO:0022627,GO:0032991,GO:0034622,GO:0034641,GO:0034645,GO:…	J
Mj-20057	XP_027210484.1	LOW QUALITY PROTEIN: ovoinhibitor-like [Penaeus vannamei]	67.35	3e-40	140	#N/A	S
Mj-20059	XP_027223730.1	venom carboxylesterase-6-like [Penaeus vannamei]	80.16	1e-68	224	#N/A	I
Mj-20067	XP_027219702.1	cysteine-rich motor neuron 1 protein-like [Penaeus vannamei]	83.75	2e-41	140	GO:0001568,GO:0001756,GO:0001944,GO:0003002,GO:0003674,GO:0003824,GO:0004672,GO:0004713,GO:0004714,GO:0004888,GO:0005010,GO:0005488,GO:0005515,GO:0005575,GO:0005576,GO:0006464,GO:0006468,GO:0006793,GO:0006796,GO:0006807,GO:0007154,GO:0007165,GO:0007166,GO:0007167,GO:0007169,GO:0007275,GO:0007389,GO:0007399,GO:0008150,GO:0008152,GO:0009653,GO:0009790,GO:0009792,GO:0009887,GO:0009888,GO:0009952,GO:…	VW
Mj-20087	XP_027219702.1	cysteine-rich motor neuron 1 protein-like [Penaeus vannamei]	83.75	2e-41	140	#N/A	#N/A
Mj-20100	XP_027219702.1	cysteine-rich motor neuron 1 protein-like [Penaeus vannamei]	83.75	2e-41	140	GO:0001568,GO:0001756,GO:0001944,GO:0003002,GO:0003674,GO:0003824,GO:0004672,GO:0004713,GO:0004714,GO:0004888,GO:0005010,GO:0005488,GO:0005515,GO:0005575,GO:0005576,GO:0006464,GO:0006468,GO:0006793,GO:0006796,GO:0006807,GO:0007154,GO:0007165,GO:0007166,GO:0007167,GO:0007169,GO:0007275,GO:0007389,GO:0007399,GO:0008150,GO:0008152,GO:0009653,GO:0009790,GO:0009792,GO:0009887,GO:0009888,GO:0009952,GO:…	VW
Mj-20133	ROT77259.1	hypothetical protein C7M84_004116 [Penaeus vannamei]	83.78	5e-63	195	#N/A	#N/A
Mj-20156	BBC20610.1	hypothetical protein [Penaeus japonicus]	99.13	1e-75	228	#N/A	#N/A
Mj-20159	BBC20610.1	hypothetical protein [Penaeus japonicus]	94.78	4e-70	214	#N/A	#N/A
Mj-20187	BAW78902.1	single VWC domain protein 5 [Penaeus japonicus]	91.26	1e-62	193	#N/A	#N/A	immune-related
Mj-20196	ROT61687.1	ribosomal protein L32 [Penaeus vannamei]	97.76	3e-93	272	GO:0002181,GO:0003674,GO:0003735,GO:0005198,GO:0005575,GO:0005622,GO:0005623,GO:0005634,GO:0005730,GO:0005737,GO:0005829,GO:0005840,GO:0006412,GO:0006518,GO:0006807,GO:0008150,GO:0008152,GO:0009058,GO:0009059,GO:0009987,GO:0010467,GO:0015934,GO:0019538,GO:0022625,GO:0022626,GO:0031974,GO:0031981,GO:0032991,GO:0034641,GO:0034645,GO:0043043,GO:0043170,GO:0043226,GO:0043227,GO:0043228,GO:0043229,GO:…	J
Mj-20224	AAS38513.1	single WAP domain-containing protein [Penaeus vannamei]	63.04	9e-19	79.7	#N/A	#N/A	AMPs and lysozyme-related
Mj-20228	XP_027237926.1	ubiquitin-60S ribosomal protein L40 [Penaeus vannamei]	79.31	4e-90	266	GO:0002181,GO:0003674,GO:0003735,GO:0005198,GO:0005575,GO:0005622,GO:0005623,GO:0005737,GO:0005829,GO:0005840,GO:0006412,GO:0006464,GO:0006508,GO:0006511,GO:0006518,GO:0006807,GO:0008150,GO:0008152,GO:0009056,GO:0009057,GO:0009058,GO:0009059,GO:0009987,GO:0010467,GO:0015934,GO:0016567,GO:0019538,GO:0019941,GO:0022625,GO:0022626,GO:0030163,GO:0031386,GO:0032446,GO:0032991,GO:0034641,GO:0034645,GO:…	J
Mj-20237	ROT82228.1	putative 60S ribosomal protein L28 [Penaeus vannamei]	77.33	2e-71	217	GO:0002181,GO:0003674,GO:0003735,GO:0005198,GO:0005575,GO:0005622,GO:0005623,GO:0005737,GO:0005829,GO:0005840,GO:0006412,GO:0006518,GO:0006807,GO:0008150,GO:0008152,GO:0009058,GO:0009059,GO:0009987,GO:0010467,GO:0015934,GO:0019538,GO:0022625,GO:0022626,GO:0032991,GO:0034641,GO:0034645,GO:0043043,GO:0043170,GO:0043226,GO:0043228,GO:0043229,GO:0043232,GO:0043603,GO:0043604,GO:0044237,GO:0044238,GO:…	J
Mj-20275	BBC20610.1	hypothetical protein [Penaeus japonicus]	95.2	3e-67	206	#N/A	#N/A
Mj-20283	#N/A	#N/A	#N/A	#N/A	#N/A	#N/A	#N/A
Mj-20374	#N/A	#N/A	#N/A	#N/A	#N/A	#N/A	#N/A
Mj-20438	ROT81589.1	60S acidic ribosomal protein P2 [Penaeus vannamei]	90.36	2e-29	108	GO:0000322,GO:0000323,GO:0000324,GO:0001932,GO:0001934,GO:0002181,GO:0002182,GO:0003674,GO:0003735,GO:0005198,GO:0005575,GO:0005622,GO:0005623,GO:0005737,GO:0005773,GO:0005829,GO:0005840,GO:0006412,GO:0006414,GO:0006518,GO:0006807,GO:0008047,GO:0008150,GO:0008152,GO:0009058,GO:0009059,GO:0009893,GO:0009987,GO:0010467,GO:0010562,GO:0010604,GO:0015934,GO:0019207,GO:0019209,GO:0019220,GO:0019222,GO:…	J
Mj-20811	XP_027226982.1	purine nucleoside phosphorylase-like isoform X1 [Penaeus vannamei]	76.62	4e-18	78.6	#N/A	#N/A
Mj-20814	AEP83534.1	cyclophilin A [Penaeus vannamei]	93.46	1e-55	185	GO:0000413,GO:0003674,GO:0003755,GO:0003824,GO:0005575,GO:0005622,GO:0005623,GO:0005737,GO:0005829,GO:0006464,GO:0006807,GO:0008150,GO:0008152,GO:0009987,GO:0016853,GO:0016859,GO:0018193,GO:0018208,GO:0019538,GO:0036211,GO:0043170,GO:0043412,GO:0044237,GO:0044238,GO:0044260,GO:0044267,GO:0044424,GO:0044444,GO:0044464,GO:0071704,GO:0140096,GO:1901564	O
Mj-20815	AEP83534.1	cyclophilin A [Penaeus vannamei]	94.51	4e-99	300	GO:0000413,GO:0003674,GO:0003755,GO:0003824,GO:0005575,GO:0005622,GO:0005623,GO:0005737,GO:0005829,GO:0006464,GO:0006807,GO:0008150,GO:0008152,GO:0009987,GO:0016853,GO:0016859,GO:0018193,GO:0018208,GO:0019538,GO:0036211,GO:0043170,GO:0043412,GO:0044237,GO:0044238,GO:0044260,GO:0044267,GO:0044424,GO:0044444,GO:0044464,GO:0071704,GO:0140096,GO:1901564	O
Mj-20825	#N/A	#N/A	#N/A	#N/A	#N/A	#N/A	#N/A
Mj-20837	ADQ43367.1	HMGBb [Penaeus vannamei]	100	5e-123	382	#N/A	K
Mj-20839	AON76442.1	caspase-3 [Penaeus japonicus]	86.61	0	596	#N/A	D
Mj-20872	XP_027216397.1	uncharacterized protein LOC113809109 [Penaeus vannamei]	68	0	709	#N/A	#N/A
Mj-20877	XP_027210151.1	RNA-binding protein squid-like isoform X2 [Penaeus vannamei]	93.91	1e-68	224	GO:0000003,GO:0000184,GO:0000226,GO:0000375,GO:0000377,GO:0000398,GO:0000578,GO:0000785,GO:0000956,GO:0001667,GO:0002009,GO:0002064,GO:0002065,GO:0002066,GO:0003002,GO:0003006,GO:0003674,GO:0003676,GO:0003723,GO:0003729,GO:0003730,GO:0005488,GO:0005575,GO:0005622,GO:0005623,GO:0005634,GO:0005654,GO:0005694,GO:0005700,GO:0005703,GO:0005737,GO:0006139,GO:0006396,GO:0006397,GO:0006401,GO:0006402,GO:…	A
Mj-20885	XP_027231118.1	very low-density lipoprotein receptor-like [Penaeus vannamei]	44.87	3e-34	136	#N/A	#N/A
Mj-20889	XP_027231118.1	very low-density lipoprotein receptor-like [Penaeus vannamei]	40.7	1e-33	135	#N/A	#N/A
Mj-20918	XP_027227780.1	uncharacterized protein LOC113819787 [Penaeus vannamei]	37.08	5e-110	372	#N/A	S
Mj-2092	#N/A	#N/A	#N/A	#N/A	#N/A	#N/A	#N/A
Mj-20941	XP_027217575.1	heterogeneous nuclear ribonucleoprotein R-like [Penaeus vannamei]	92.9	0	823	#N/A	A
Mj-20967	#N/A	#N/A	#N/A	#N/A	#N/A	#N/A	#N/A
Mj-20968	AMH87234.1	penaeidin-II [Penaeus japonicus]	98.65	3e-32	119	#N/A	#N/A	AMPs and lysozyme-related
Mj-20969	XP_027215589.1	nipped-B-like protein B isoform X2 [Penaeus vannamei]	97.05	0	3697	GO:0000003,GO:0000070,GO:0000278,GO:0000280,GO:0000785,GO:0000819,GO:0003008,GO:0003674,GO:0003682,GO:0005488,GO:0005515,GO:0005575,GO:0005622,GO:0005623,GO:0005634,GO:0005694,GO:0005700,GO:0006325,GO:0006355,GO:0006357,GO:0006996,GO:0007049,GO:0007059,GO:0007062,GO:0007064,GO:0007127,GO:0007129,GO:0007130,GO:0007275,GO:0007399,GO:0007417,GO:0007420,GO:0007610,GO:0007611,GO:0007612,GO:0007613,GO:…	BDL
Mj-20981	XP_027218361.1	uncharacterized protein LOC113810909 [Penaeus vannamei]	42.86	4e-31	115	#N/A	#N/A
Mj-20989	ROT63850.1	hypothetical protein C7M84_018231 [Penaeus vannamei]	92.14	4e-173	497	#N/A	TU
Mj-20990	ROT63850.1	hypothetical protein C7M84_018231 [Penaeus vannamei]	93.5	3e-145	457	#N/A	TU
Mj-20991	ROT63850.1	hypothetical protein C7M84_018231 [Penaeus vannamei]	89.92	8e-57	196	#N/A	TU
Mj-20997	XP_027229840.1	uncharacterized protein LOC113821534 [Penaeus vannamei]	73.96	1e-52	185	GO:0002682,GO:0002684,GO:0005575,GO:0008150,GO:0008284,GO:0016020,GO:0016021,GO:0031224,GO:0035206,GO:0035208,GO:0042127,GO:0044425,GO:0048518,GO:0048522,GO:0050789,GO:0050793,GO:0050794,GO:0051239,GO:0065007	S
Mj-20999	XP_027229840.1	uncharacterized protein LOC113821534 [Penaeus vannamei]	73.96	2e-54	185	#N/A	#N/A
Mj-21000	#N/A	#N/A	#N/A	#N/A	#N/A	#N/A	#N/A
Mj-21002	#N/A	#N/A	#N/A	#N/A	#N/A	#N/A	#N/A
Mj-21003	#N/A	#N/A	#N/A	#N/A	#N/A	#N/A	#N/A
Mj-21004	#N/A	#N/A	#N/A	#N/A	#N/A	#N/A	#N/A
Mj-21005	#N/A	#N/A	#N/A	#N/A	#N/A	#N/A	#N/A
Mj-21006	ALI93850.1	DEAD-box RNA helicase variant 1 [Penaeus vannamei]	100	0	777	#N/A	A
Mj-21009	ROT82899.1	putative metastasis-associated protein MTA3 isoform X1 [Penaeus vannamei]	99.64	0	1099	GO:0000118,GO:0000228,GO:0000785,GO:0000790,GO:0005575,GO:0005622,GO:0005623,GO:0005634,GO:0005654,GO:0005694,GO:0006323,GO:0006325,GO:0006342,GO:0006355,GO:0006996,GO:0008150,GO:0009889,GO:0009890,GO:0009892,GO:0009987,GO:0010468,GO:0010556,GO:0010558,GO:0010605,GO:0010629,GO:0016043,GO:0016458,GO:0016581,GO:0017053,GO:0019219,GO:0019222,GO:0030261,GO:0031323,GO:0031324,GO:0031326,GO:0031327,GO:…	K
Mj-21023	XP_027228266.1	RNA-binding protein cabeza-like isoform X1 [Penaeus vannamei]	93.98	1e-59	204	GO:0003674,GO:0003676,GO:0003723,GO:0005488,GO:0097159,GO:1901363	S
Mj-21032	BAC99073.1	alpha2-macroglobulin homolog [Penaeus japonicus]	98.96	0	2568	#N/A	O	clotting-related
Mj-21036	AIJ28479.1	ubiquitin/ribosomal L40 fusion protein [Penaeus vannamei]	98.2	7e-76	226	GO:0002181,GO:0003674,GO:0003735,GO:0005198,GO:0005575,GO:0005622,GO:0005623,GO:0005737,GO:0005829,GO:0005840,GO:0006412,GO:0006464,GO:0006508,GO:0006511,GO:0006518,GO:0006807,GO:0008150,GO:0008152,GO:0009056,GO:0009057,GO:0009058,GO:0009059,GO:0009987,GO:0010467,GO:0015934,GO:0016567,GO:0019538,GO:0019941,GO:0022625,GO:0022626,GO:0030163,GO:0031386,GO:0032446,GO:0032991,GO:0034641,GO:0034645,GO:…	J
Mj-21042	BAD15063.1	crustin-like peptide type 2 [Penaeus japonicus]	100	5e-59	195	#N/A	#N/A	AMPs and lysozyme-related
Mj-21076	#N/A	#N/A	#N/A	#N/A	#N/A	#N/A	#N/A
Mj-21096	XP_027207148.1	regucalcin-like [Penaeus vannamei]	69.58	3e-169	486	#N/A	PT
Mj-21098	#N/A	#N/A	#N/A	#N/A	#N/A	#N/A	#N/A
Mj-21110	XP_027216086.1	uncharacterized protein LOC113808796 [Penaeus vannamei]	55.29	6e-25	99.4	#N/A	#N/A
Mj-21115	XP_027216086.1	uncharacterized protein LOC113808796 [Penaeus vannamei]	60.67	2e-32	119	#N/A	#N/A
Mj-21116	XP_027216086.1	uncharacterized protein LOC113808796 [Penaeus vannamei]	55.29	2e-25	100	#N/A	#N/A
Mj-21130	XP_027209168.1	venom protein 302-like [Penaeus vannamei]	78.69	3e-26	100	#N/A	#N/A
Mj-21138	XP_027214457.1	LOW QUALITY PROTEIN: phenoloxidase-activating factor 2-like [Penaeus vannamei]	80.26	0	584	#N/A	O	melanization-related
Mj-21141	AFW98993.1	prophenoloxidase activating factor [Penaeus vannamei]	88.61	0	667	#N/A	#N/A	melanization-related
Mj-21195	XP_027223730.1	venom carboxylesterase-6-like [Penaeus vannamei]	82.23	0	946	GO:0000003,GO:0003674,GO:0003824,GO:0005575,GO:0005576,GO:0007276,GO:0007292,GO:0007320,GO:0007610,GO:0007617,GO:0007618,GO:0007619,GO:0007620,GO:0008150,GO:0008152,GO:0009056,GO:0009058,GO:0009987,GO:0010817,GO:0016787,GO:0016788,GO:0019098,GO:0019748,GO:0019953,GO:0022414,GO:0030728,GO:0032501,GO:0032504,GO:0034338,GO:0042445,GO:0042446,GO:0042810,GO:0042811,GO:0044237,GO:0044249,GO:0044550,GO:…	G
Mj-2121	BAC57467.1	c-type lysozyme [Penaeus japonicus]	95.35	4e-38	141	#N/A	G	AMPs and lysozyme-related
Mj-21219	ABD92928.1	hemocyte transglutaminase [Penaeus japonicus]	99.74	0	1557	#N/A	S	clotting-related
Mj-21221	BAD36808.1	transglutaminase, partial [Penaeus japonicus]	99.21	0	1456	#N/A	S	clotting-related
Mj-2123	#N/A	#N/A	#N/A	#N/A	#N/A	#N/A	#N/A
Mj-21255	XP_027219293.1	insulin-like growth factor-binding protein 4 [Penaeus vannamei]	39.64	3e-44	154	#N/A	S	cell growth-related
Mj-21257	XP_027219293.1	insulin-like growth factor-binding protein 4 [Penaeus vannamei]	39.19	5e-43	151	#N/A	S	cell growth-related
Mj-21267	XP_027210484.1	LOW QUALITY PROTEIN: ovoinhibitor-like [Penaeus vannamei]	51.82	2e-63	208	#N/A	#N/A
Mj-21270	XP_027210484.1	LOW QUALITY PROTEIN: ovoinhibitor-like [Penaeus vannamei]	46.64	1e-53	182	#N/A	#N/A
Mj-21271	ROT77823.1	hemocyte kazal-type proteinase inhibitor [Penaeus vannamei]	50	3e-46	100	#N/A	S	crayfish hemocyte marker
Mj-21278	XP_027210484.1	LOW QUALITY PROTEIN: ovoinhibitor-like [Penaeus vannamei]	54.4	4e-53	180	#N/A	#N/A
Mj-21282	ROT78162.1	Gamma-interferon-inducible lysosomal thiol reductase [Penaeus vannamei]	81.87	4e-113	339	GO:0000375,GO:0000377,GO:0000398,GO:0003674,GO:0005488,GO:0005515,GO:0005575,GO:0006139,GO:0006396,GO:0006397,GO:0006725,GO:0006807,GO:0007346,GO:0008150,GO:0008152,GO:0008380,GO:0009987,GO:0010389,GO:0010467,GO:0010564,GO:0016070,GO:0016071,GO:0032991,GO:0034641,GO:0043170,GO:0044237,GO:0044238,GO:0046483,GO:0050789,GO:0050794,GO:0051726,GO:0065007,GO:0071704,GO:0090304,GO:1901360,GO:1901987,GO:…	Z
Mj-21283	ROT78162.1	Gamma-interferon-inducible lysosomal thiol reductase [Penaeus vannamei]	81.35	6e-112	337	GO:0000375,GO:0000377,GO:0000398,GO:0003674,GO:0005488,GO:0005515,GO:0005575,GO:0006139,GO:0006396,GO:0006397,GO:0006725,GO:0006807,GO:0007346,GO:0008150,GO:0008152,GO:0008380,GO:0009987,GO:0010389,GO:0010467,GO:0010564,GO:0016070,GO:0016071,GO:0032991,GO:0034641,GO:0043170,GO:0044237,GO:0044238,GO:0046483,GO:0050789,GO:0050794,GO:0051726,GO:0065007,GO:0071704,GO:0090304,GO:1901360,GO:1901987,GO:…	Z
Mj-21287	XP_027235198.1	membrane metallo-endopeptidase-like 1 isoform X2 [Penaeus vannamei]	77.6	0	1016	#N/A	E
Mj-21288	XP_027235196.1	membrane metallo-endopeptidase-like 1 isoform X1 [Penaeus vannamei]	75.31	0	648	#N/A	E
Mj-21302	XP_027226055.1	protein split ends-like [Penaeus vannamei]	58.65	3e-46	168	#N/A	#N/A
Mj-21304	XP_027229320.1	LOW QUALITY PROTEIN: SH3 domain-binding glutamic acid-rich protein homolog [Penaeus vannamei]	87.27	1e-73	235	GO:0005575,GO:0005622,GO:0005623,GO:0005737,GO:0044424,GO:0044464	S
Mj-21305	XP_027229320.1	LOW QUALITY PROTEIN: SH3 domain-binding glutamic acid-rich protein homolog [Penaeus vannamei]	91.8	2e-68	230	#N/A	S
Mj-21312	AHA83578.1	integrin beta subunit [Penaeus japonicus]	99.49	0	1554	GO:0000003,GO:0000902,GO:0000904,GO:0001667,GO:0001700,GO:0001703,GO:0001894,GO:0002009,GO:0002011,GO:0002064,GO:0002065,GO:0002066,GO:0002164,GO:0002165,GO:0002376,GO:0002520,GO:0003006,GO:0003008,GO:0003344,GO:0003674,GO:0005488,GO:0005515,GO:0005575,GO:0005622,GO:0005623,GO:0005737,GO:0005886,GO:0005887,GO:0005912,GO:0005924,GO:0005925,GO:0005927,GO:0006928,GO:0006929,GO:0006930,GO:0006935,GO:…	TW	phagocytosis-related
Mj-21314	#N/A	#N/A	#N/A	#N/A	#N/A	#N/A	#N/A
Mj-21334	#N/A	#N/A	#N/A	#N/A	#N/A	#N/A	#N/A
Mj-21342	AVG44186.1	crustin-like protein [Penaeus japonicus]	100	1e-41	143	#N/A	#N/A	AMPs and lysozyme-related
Mj-21347	ROT80617.1	Beta-parvin [Penaeus vannamei]	87.5	1e-46	170	#N/A	#N/A
Mj-21368	BAB85575.1	cyclic AMP-regulated protein like protein, partial [Penaeus japonicus]	97.39	4e-101	303	#N/A	Z
Mj-21390	ROT85466.1	calponin/transgelin [Penaeus vannamei]	97.85	2e-130	381	GO:0000976,GO:0000977,GO:0000978,GO:0000987,GO:0001012,GO:0001067,GO:0003008,GO:0003012,GO:0003674,GO:0003676,GO:0003677,GO:0003690,GO:0003779,GO:0005488,GO:0005515,GO:0005575,GO:0005622,GO:0005623,GO:0005737,GO:0005856,GO:0005865,GO:0006936,GO:0006939,GO:0007154,GO:0007165,GO:0008092,GO:0008150,GO:0009719,GO:0009725,GO:0009755,GO:0009987,GO:0010033,GO:0015629,GO:0023052,GO:0030016,GO:0030017,GO:…	Z
Mj-21406	#N/A	#N/A	#N/A	#N/A	#N/A	#N/A	#N/A
Mj-21408	XP_027229159.1	serine/arginine-rich splicing factor 2-like isoform X4 [Penaeus vannamei]	100	3e-72	229	GO:0000381,GO:0000785,GO:0001178,GO:0003674,GO:0003676,GO:0003723,GO:0003729,GO:0005488,GO:0005515,GO:0005575,GO:0005622,GO:0005623,GO:0005634,GO:0005654,GO:0005694,GO:0006355,GO:0006357,GO:0008150,GO:0009889,GO:0010468,GO:0010556,GO:0016604,GO:0016607,GO:0019219,GO:0019222,GO:0031323,GO:0031326,GO:0031440,GO:0031974,GO:0031981,GO:0043226,GO:0043227,GO:0043228,GO:0043229,GO:0043231,GO:0043232,GO:…	A
Mj-21421	XP_027218379.1	uncharacterized protein LOC113810921 [Penaeus vannamei]	61.24	1e-72	240	#N/A	#N/A
Mj-21427	XP_027229129.1	tropomyosin isoforms c/e isoform X14 [Penaeus vannamei]	99.51	2e-98	303	GO:0000003,GO:0000578,GO:0000902,GO:0000904,GO:0003002,GO:0003006,GO:0003008,GO:0003012,GO:0003674,GO:0003779,GO:0005198,GO:0005488,GO:0005515,GO:0005575,GO:0005622,GO:0005623,GO:0005737,GO:0005856,GO:0005862,GO:0005865,GO:0006403,GO:0006936,GO:0006950,GO:0006996,GO:0007010,GO:0007015,GO:0007028,GO:0007275,GO:0007276,GO:0007281,GO:0007292,GO:0007308,GO:0007309,GO:0007314,GO:0007315,GO:0007316,GO:…	Z
Mj-21448	ROT67998.1	putative angiopoietin-1 receptor [Penaeus vannamei]	59	0	853	#N/A	T
Mj-21449	#N/A	#N/A	#N/A	#N/A	#N/A	#N/A	#N/A
Mj-21450	#N/A	#N/A	#N/A	#N/A	#N/A	#N/A	#N/A
Mj-21466	ROT78501.1	crustacean hematopoietic factor-like protein [Penaeus vannamei]	54.67	8e-21	85.9	#N/A	#N/A	cell growth-related
Mj-21472	XP_027228907.1	poly [ADP-ribose] polymerase 3-like [Penaeus vannamei]	45.19	6e-22	101	GO:0000723,GO:0003674,GO:0003824,GO:0003909,GO:0003910,GO:0003950,GO:0005575,GO:0005622,GO:0005623,GO:0005634,GO:0005694,GO:0005737,GO:0005814,GO:0005815,GO:0005856,GO:0006139,GO:0006259,GO:0006260,GO:0006261,GO:0006266,GO:0006271,GO:0006273,GO:0006281,GO:0006302,GO:0006464,GO:0006471,GO:0006725,GO:0006807,GO:0006950,GO:0006974,GO:0006996,GO:0007346,GO:0008104,GO:0008150,GO:0008152,GO:0009058,GO:…	KLO
Mj-21473	XP_027210301.1	uncharacterized protein PF11_0207-like isoform X5 [Penaeus vannamei]	36.25	2e-26	112	GO:0000723,GO:0003674,GO:0003824,GO:0003909,GO:0003910,GO:0003950,GO:0005575,GO:0005622,GO:0005623,GO:0005634,GO:0005694,GO:0005737,GO:0005814,GO:0005815,GO:0005856,GO:0006139,GO:0006259,GO:0006260,GO:0006261,GO:0006266,GO:0006271,GO:0006273,GO:0006281,GO:0006302,GO:0006464,GO:0006471,GO:0006725,GO:0006807,GO:0006950,GO:0006974,GO:0006996,GO:0007346,GO:0008104,GO:0008150,GO:0008152,GO:0009058,GO:…	KLO
Mj-21476	ROT70234.1	hypothetical protein C7M84_011516 [Penaeus vannamei]	43.65	3e-24	103	GO:0000723,GO:0003674,GO:0003824,GO:0003909,GO:0003910,GO:0003950,GO:0005575,GO:0005622,GO:0005623,GO:0005634,GO:0005694,GO:0005737,GO:0005814,GO:0005815,GO:0005856,GO:0006139,GO:0006259,GO:0006260,GO:0006261,GO:0006266,GO:0006271,GO:0006273,GO:0006281,GO:0006302,GO:0006464,GO:0006471,GO:0006725,GO:0006807,GO:0006950,GO:0006974,GO:0006996,GO:0007346,GO:0008104,GO:0008150,GO:0008152,GO:0009058,GO:…	KLO
Mj-21477	XP_027228907.1	poly [ADP-ribose] polymerase 3-like [Penaeus vannamei]	45.19	1e-21	100	GO:0000723,GO:0003674,GO:0003824,GO:0003909,GO:0003910,GO:0003950,GO:0005575,GO:0005622,GO:0005623,GO:0005634,GO:0005694,GO:0005737,GO:0005814,GO:0005815,GO:0005856,GO:0006139,GO:0006259,GO:0006260,GO:0006261,GO:0006266,GO:0006271,GO:0006273,GO:0006281,GO:0006302,GO:0006464,GO:0006471,GO:0006725,GO:0006807,GO:0006950,GO:0006974,GO:0006996,GO:0007346,GO:0008104,GO:0008150,GO:0008152,GO:0009058,GO:…	KLO
Mj-2149	XP_027218132.1	uncharacterized protein LOC113810692 [Penaeus vannamei]	89.26	1e-51	182	#N/A	#N/A
Mj-21499	ROT77981.1	hypothetical protein C7M84_003300 [Penaeus vannamei]	65.07	3e-35	134	#N/A	#N/A
Mj-21535	XP_027232859.1	septin-7-like isoform X2 [Penaeus vannamei]	93.76	0	764	GO:0000166,GO:0000278,GO:0000281,GO:0000910,GO:0000912,GO:0000915,GO:0001882,GO:0001883,GO:0003674,GO:0003779,GO:0003824,GO:0003924,GO:0005488,GO:0005515,GO:0005525,GO:0005575,GO:0005576,GO:0005622,GO:0005623,GO:0005737,GO:0005856,GO:0005886,GO:0005938,GO:0005940,GO:0006915,GO:0006996,GO:0007010,GO:0007049,GO:0007275,GO:0007349,GO:0008017,GO:0008092,GO:0008150,GO:0008219,GO:0009653,GO:0009987,GO:…	DUZ
Mj-21536	XP_027232859.1	septin-7-like isoform X2 [Penaeus vannamei]	91.86	0	786	GO:0000166,GO:0000278,GO:0000281,GO:0000910,GO:0000912,GO:0000915,GO:0001882,GO:0001883,GO:0003674,GO:0003779,GO:0003824,GO:0003924,GO:0005488,GO:0005515,GO:0005525,GO:0005575,GO:0005576,GO:0005622,GO:0005623,GO:0005737,GO:0005856,GO:0005886,GO:0005938,GO:0005940,GO:0006915,GO:0006996,GO:0007010,GO:0007049,GO:0007275,GO:0007349,GO:0008017,GO:0008092,GO:0008150,GO:0008219,GO:0009653,GO:0009987,GO:…	DUZ
Mj-21589	XP_027235415.1	uncharacterized protein LOC113826735 [Penaeus vannamei]	86.09	9e-116	355	#N/A	#N/A
Mj-216	XP_027224069.1	lysine-specific demethylase 2A-like [Penaeus vannamei]	85.94	0	2783	GO:0000151,GO:0002164,GO:0003002,GO:0003674,GO:0003824,GO:0005575,GO:0005622,GO:0005623,GO:0005634,GO:0006325,GO:0006464,GO:0006482,GO:0006508,GO:0006511,GO:0006807,GO:0006996,GO:0007275,GO:0007379,GO:0007389,GO:0007525,GO:0007526,GO:0008150,GO:0008152,GO:0008214,GO:0009056,GO:0009057,GO:0009791,GO:0009987,GO:0010498,GO:0016043,GO:0016567,GO:0016569,GO:0016570,GO:0016574,GO:0016577,GO:0019005,GO:…	B
Mj-21604	XP_027222990.1	uncharacterized protein LOC113815108 [Penaeus vannamei]	90.59	0	1144	GO:0000003,GO:0000266,GO:0000422,GO:0001654,GO:0002082,GO:0003006,GO:0003674,GO:0003824,GO:0004672,GO:0004674,GO:0005488,GO:0005515,GO:0005575,GO:0005622,GO:0005623,GO:0005737,GO:0005739,GO:0006140,GO:0006464,GO:0006468,GO:0006508,GO:0006511,GO:0006793,GO:0006796,GO:0006807,GO:0006810,GO:0006914,GO:0006928,GO:0006950,GO:0006979,GO:0006996,GO:0007005,GO:0007017,GO:0007018,GO:0007154,GO:0007267,GO:…	T
Mj-21665	ROT63998.1	putative RNA-directed DNA polymerase from mobile element jockey-like [Penaeus vannamei]	48.17	3e-98	306	#N/A	S
Mj-21668	XP_027213756.1	WASH complex subunit 2C-like [Penaeus vannamei]	65.45	0	850	#N/A	#N/A
Mj-21778	XP_027229554.1	uncharacterized protein LOC113821262 [Penaeus vannamei]	93.12	0	1360	GO:0000288,GO:0000290,GO:0000291,GO:0000775,GO:0000776,GO:0000932,GO:0000956,GO:0001731,GO:0002151,GO:0002181,GO:0002183,GO:0003674,GO:0003676,GO:0003682,GO:0003723,GO:0003727,GO:0003729,GO:0005488,GO:0005515,GO:0005575,GO:0005622,GO:0005623,GO:0005634,GO:0005654,GO:0005694,GO:0005737,GO:0005829,GO:0005840,GO:0006139,GO:0006401,GO:0006402,GO:0006412,GO:0006413,GO:0006417,GO:0006446,GO:0006518,GO:…	S
Mj-218	ROT61977.1	hypothetical protein C7M84_020199 [Penaeus vannamei]	100	0	764	GO:0001505,GO:0001654,GO:0003674,GO:0005488,GO:0005515,GO:0005575,GO:0005622,GO:0005623,GO:0005737,GO:0006810,GO:0006836,GO:0006887,GO:0006903,GO:0006904,GO:0007154,GO:0007163,GO:0007267,GO:0007268,GO:0007269,GO:0007275,GO:0007423,GO:0008104,GO:0008150,GO:0009987,GO:0016079,GO:0016080,GO:0016081,GO:0016192,GO:0017156,GO:0022406,GO:0023052,GO:0023061,GO:0032501,GO:0032502,GO:0032940,GO:0033036,GO:…	S
Mj-21932	XP_027232565.1	integral membrane protein 2B-like isoform X2 [Penaeus vannamei]	85.32	6e-145	446	GO:0001540,GO:0003674,GO:0005488,GO:0005575,GO:0005576,GO:0005615,GO:0005622,GO:0005623,GO:0005737,GO:0005794,GO:0005886,GO:0007275,GO:0007399,GO:0008150,GO:0009889,GO:0009890,GO:0009892,GO:0010556,GO:0010558,GO:0010559,GO:0010561,GO:0010605,GO:0012505,GO:0016020,GO:0019222,GO:0031323,GO:0031324,GO:0031326,GO:0031327,GO:0031982,GO:0032501,GO:0032502,GO:0033218,GO:0042277,GO:0042984,GO:0042985,GO:…	S
Mj-22023	XP_027238100.1	lysine-specific demethylase 3A-like [Penaeus vannamei]	95.9	0	2486	GO:0000785,GO:0000976,GO:0001067,GO:0003674,GO:0003676,GO:0003677,GO:0003682,GO:0003690,GO:0003824,GO:0005488,GO:0005575,GO:0005622,GO:0005623,GO:0005634,GO:0005694,GO:0006325,GO:0006355,GO:0006464,GO:0006482,GO:0006807,GO:0006996,GO:0008150,GO:0008152,GO:0008214,GO:0009889,GO:0009987,GO:0010468,GO:0010556,GO:0010638,GO:0016043,GO:0016569,GO:0016570,GO:0016577,GO:0019219,GO:0019222,GO:0019538,GO:…	K
Mj-22024	XP_027224337.1	RNA-binding protein 1-like [Penaeus vannamei]	100	3e-47	164	GO:0000375,GO:0000377,GO:0000381,GO:0000398,GO:0001178,GO:0003674,GO:0003676,GO:0003723,GO:0003729,GO:0005488,GO:0006139,GO:0006355,GO:0006357,GO:0006396,GO:0006397,GO:0006725,GO:0006807,GO:0008150,GO:0008152,GO:0008380,GO:0009889,GO:0009987,GO:0010467,GO:0010468,GO:0010556,GO:0016070,GO:0016071,GO:0019219,GO:0019222,GO:0031323,GO:0031326,GO:0031440,GO:0034641,GO:0043170,GO:0043254,GO:0043484,GO:…	A
Mj-22025	XP_027226769.1	RNA-binding protein 1-like isoform X1 [Penaeus vannamei]	89.53	1e-44	163	#N/A	#N/A
Mj-22071	XP_027207162.1	40S ribosomal protein S26-like [Penaeus vannamei]	100	1e-71	216	GO:0002181,GO:0003674,GO:0003676,GO:0003723,GO:0003729,GO:0003735,GO:0005198,GO:0005488,GO:0005575,GO:0005622,GO:0005623,GO:0005737,GO:0005783,GO:0005789,GO:0005791,GO:0005829,GO:0005840,GO:0005844,GO:0006412,GO:0006518,GO:0006807,GO:0008150,GO:0008152,GO:0009058,GO:0009059,GO:0009987,GO:0010467,GO:0012505,GO:0015935,GO:0016020,GO:0019538,GO:0022626,GO:0022627,GO:0030867,GO:0031090,GO:0031984,GO:…	J
Mj-22189	APU53308.1	arginine kinase [Penaeus japonicus]	100	0	721	GO:0003674,GO:0003824,GO:0004054,GO:0006793,GO:0006796,GO:0008150,GO:0008152,GO:0009987,GO:0016301,GO:0016310,GO:0016740,GO:0016772,GO:0016775,GO:0019202,GO:0044237	C
Mj-22221	BAI50776.1	serine proteinase inhibitor [Penaeus japonicus]	99.76	0	789	GO:0002009,GO:0002165,GO:0003674,GO:0004857,GO:0004866,GO:0004867,GO:0005575,GO:0005576,GO:0005615,GO:0007275,GO:0007444,GO:0007472,GO:0007476,GO:0007552,GO:0007560,GO:0008150,GO:0008592,GO:0009605,GO:0009607,GO:0009620,GO:0009653,GO:0009791,GO:0009886,GO:0009887,GO:0009888,GO:0009892,GO:0009966,GO:0009968,GO:0010466,GO:0010605,GO:0010646,GO:0010648,GO:0010951,GO:0019222,GO:0023051,GO:0023057,GO:…	V
Mj-22271	XP_027208510.1	uncharacterized protein LOC113802182 [Penaeus vannamei]	68.57	4e-35	129	#N/A	#N/A
Mj-22278	#N/A	#N/A	#N/A	#N/A	#N/A	#N/A	#N/A
Mj-22286	ROT64653.1	ribosomal protein S9 [Penaeus vannamei]	100	4e-90	271	GO:0002181,GO:0003674,GO:0003676,GO:0003723,GO:0003735,GO:0005198,GO:0005488,GO:0005575,GO:0005622,GO:0005623,GO:0005634,GO:0005730,GO:0005737,GO:0005829,GO:0005840,GO:0006412,GO:0006417,GO:0006450,GO:0006518,GO:0006807,GO:0008150,GO:0008152,GO:0009058,GO:0009059,GO:0009889,GO:0009891,GO:0009893,GO:0009987,GO:0010467,GO:0010468,GO:0010556,GO:0010557,GO:0010604,GO:0010608,GO:0010628,GO:0015935,GO:…	J
Mj-22287	ROT64653.1	ribosomal protein S9 [Penaeus vannamei]	98.97	9e-135	382	GO:0002181,GO:0003674,GO:0003676,GO:0003723,GO:0003735,GO:0005198,GO:0005488,GO:0005575,GO:0005622,GO:0005623,GO:0005634,GO:0005730,GO:0005737,GO:0005829,GO:0005840,GO:0006412,GO:0006417,GO:0006450,GO:0006518,GO:0006807,GO:0008150,GO:0008152,GO:0009058,GO:0009059,GO:0009889,GO:0009891,GO:0009893,GO:0009987,GO:0010467,GO:0010468,GO:0010556,GO:0010557,GO:0010604,GO:0010608,GO:0010628,GO:0015935,GO:…	J
Mj-2230	XP_027223225.1	excitatory amino acid transporter 3-like isoform X1 [Penaeus vannamei]	99.4	0	876	#N/A	P
Mj-22380	XP_027225324.1	G protein-coupled receptor kinase 2-like [Penaeus vannamei]	99.24	0	1077	GO:0000003,GO:0000902,GO:0000904,GO:0002009,GO:0002064,GO:0002165,GO:0002682,GO:0002697,GO:0002700,GO:0002759,GO:0002784,GO:0002805,GO:0002831,GO:0002920,GO:0003002,GO:0003006,GO:0003381,GO:0003382,GO:0003383,GO:0003384,GO:0003674,GO:0003824,GO:0004672,GO:0004674,GO:0004703,GO:0005575,GO:0005622,GO:0005623,GO:0005737,GO:0005886,GO:0006464,GO:0006468,GO:0006793,GO:0006796,GO:0006807,GO:0006928,GO:…	T
Mj-22477	#N/A	#N/A	#N/A	#N/A	#N/A	#N/A	#N/A
Mj-22479	ROT65943.1	hypothetical protein C7M84_016070 [Penaeus vannamei]	46.37	9e-53	187	#N/A	#N/A
Mj-22480	ROT65943.1	hypothetical protein C7M84_016070 [Penaeus vannamei]	46.37	9e-52	187	#N/A	#N/A
Mj-225	XP_027227780.1	uncharacterized protein LOC113819787 [Penaeus vannamei]	37.08	6e-110	372	#N/A	S
Mj-22504	#N/A	#N/A	#N/A	#N/A	#N/A	#N/A	#N/A
Mj-2252	ROT71999.1	putative alsin [Penaeus vannamei]	64.5	3e-128	395	#N/A	#N/A
Mj-22592	AAG16253.1	beta-actin [Penaeus vannamei]	99.47	0	785	GO:0000003,GO:0000228,GO:0000278,GO:0000281,GO:0000785,GO:0000790,GO:0000910,GO:0003006,GO:0003674,GO:0005198,GO:0005200,GO:0005575,GO:0005622,GO:0005623,GO:0005634,GO:0005694,GO:0005856,GO:0005884,GO:0006325,GO:0006338,GO:0006996,GO:0007010,GO:0007049,GO:0007275,GO:0007276,GO:0007281,GO:0007283,GO:0007286,GO:0007291,GO:0007349,GO:0008104,GO:0008150,GO:0009653,GO:0009987,GO:0015629,GO:0016043,GO:…	Z
Mj-22597	XP_027220889.1	mucin-5AC-like [Penaeus vannamei]	95.96	0	833	#N/A	S
Mj-22613	XP_027215768.1	mid1-interacting protein 1-like [Penaeus vannamei]	94.74	2e-103	323	GO:0003674,GO:0005488,GO:0005515,GO:0008092,GO:0017022	S
Mj-22660	ROT78058.1	hypothetical protein C7M84_003241 [Penaeus vannamei]	96	2e-113	341	GO:0001558,GO:0005575,GO:0005622,GO:0005623,GO:0005634,GO:0008150,GO:0040008,GO:0043226,GO:0043227,GO:0043229,GO:0043231,GO:0044424,GO:0044464,GO:0050789,GO:0050794,GO:0051128,GO:0065007	S
Mj-22661	ROT78058.1	hypothetical protein C7M84_003241 [Penaeus vannamei]	95.68	5e-88	270	GO:0001558,GO:0005575,GO:0005622,GO:0005623,GO:0005634,GO:0008150,GO:0040008,GO:0043226,GO:0043227,GO:0043229,GO:0043231,GO:0044424,GO:0044464,GO:0050789,GO:0050794,GO:0051128,GO:0065007	S
Mj-22662	XP_027210840.1	E3 ubiquitin-protein ligase AMFR-like [Penaeus vannamei]	97.17	0	1199	#N/A	O
Mj-22708	XP_027219875.1	cell division cycle 7-related protein kinase-like isoform X2 [Penaeus vannamei]	92.48	0	1377	GO:0000003,GO:0000278,GO:0000724,GO:0000725,GO:0000727,GO:0002064,GO:0002065,GO:0002066,GO:0003006,GO:0003674,GO:0003824,GO:0004672,GO:0004674,GO:0005575,GO:0005622,GO:0005623,GO:0005634,GO:0005737,GO:0006139,GO:0006259,GO:0006260,GO:0006261,GO:0006270,GO:0006275,GO:0006277,GO:0006281,GO:0006302,GO:0006310,GO:0006325,GO:0006464,GO:0006468,GO:0006725,GO:0006793,GO:0006796,GO:0006807,GO:0006810,GO:…	L
Mj-22709	ROT71391.1	Cell division cycle 7-related protein kinase [Penaeus vannamei]	92.51	0	1384	GO:0000003,GO:0000278,GO:0000724,GO:0000725,GO:0000727,GO:0002064,GO:0002065,GO:0002066,GO:0003006,GO:0003674,GO:0003824,GO:0004672,GO:0004674,GO:0005575,GO:0005622,GO:0005623,GO:0005634,GO:0005737,GO:0006139,GO:0006259,GO:0006260,GO:0006261,GO:0006270,GO:0006275,GO:0006277,GO:0006281,GO:0006302,GO:0006310,GO:0006325,GO:0006464,GO:0006468,GO:0006725,GO:0006793,GO:0006796,GO:0006807,GO:0006810,GO:…	L
Mj-22847	XP_027220732.1	LOW QUALITY PROTEIN: tRNA selenocysteine 1-associated protein 1-like [Penaeus vannamei]	98.92	0	540	#N/A	A
Mj-2285	XP_027208915.1	rab GDP dissociation inhibitor alpha-like [Penaeus vannamei]	99.33	0	872	GO:0001505,GO:0003674,GO:0005092,GO:0005575,GO:0005622,GO:0005623,GO:0005737,GO:0006810,GO:0006836,GO:0007154,GO:0007267,GO:0007268,GO:0007269,GO:0008021,GO:0008150,GO:0009987,GO:0012505,GO:0016192,GO:0023052,GO:0023061,GO:0030133,GO:0030234,GO:0030695,GO:0031410,GO:0031982,GO:0032940,GO:0043226,GO:0043227,GO:0043229,GO:0044424,GO:0044444,GO:0044456,GO:0044464,GO:0045202,GO:0046903,GO:0050790,GO:…	O
Mj-2289	#N/A	#N/A	#N/A	#N/A	#N/A	#N/A	#N/A
Mj-22903	XP_027236734.1	uncharacterized protein LOC113827978 isoform X1 [Penaeus vannamei]	68.29	2e-53	189	#N/A	#N/A
Mj-22911	XP_027222079.1	uncharacterized protein LOC113814247 [Penaeus vannamei]	93.17	0	1054	#N/A	#N/A
Mj-23	XP_027212015.1	PHD finger protein rhinoceros-like [Penaeus vannamei]	93.11	0	4758	GO:0001654,GO:0001745,GO:0001751,GO:0001754,GO:0005575,GO:0005622,GO:0005623,GO:0005634,GO:0007275,GO:0007399,GO:0007423,GO:0008150,GO:0009653,GO:0009887,GO:0009966,GO:0009968,GO:0009987,GO:0010646,GO:0010648,GO:0022008,GO:0023051,GO:0023057,GO:0030154,GO:0030182,GO:0032501,GO:0032502,GO:0042051,GO:0042058,GO:0042059,GO:0042461,GO:0042462,GO:0043226,GO:0043227,GO:0043229,GO:0043231,GO:0044424,GO:…	S
Mj-23032	ROT65770.1	putative enzymatic polyprotein [Penaeus vannamei]	66.36	0	579	#N/A	O
Mj-23036	ROT85771.1	ribosomal protein L11 [Penaeus vannamei]	96.62	4e-101	297	GO:0000027,GO:0002181,GO:0003674,GO:0003676,GO:0003723,GO:0003735,GO:0005198,GO:0005488,GO:0005515,GO:0005575,GO:0005622,GO:0005623,GO:0005634,GO:0005730,GO:0005737,GO:0005829,GO:0005840,GO:0006412,GO:0006518,GO:0006807,GO:0006996,GO:0008150,GO:0008152,GO:0009058,GO:0009059,GO:0009987,GO:0010467,GO:0015934,GO:0016043,GO:0019538,GO:0022607,GO:0022613,GO:0022618,GO:0022625,GO:0022626,GO:0031974,GO:…	J
Mj-2328	AFW98993.1	prophenoloxidase activating factor [Penaeus vannamei]	88.61	0	667	#N/A	O	melanization-related
Mj-23288	XP_027220544.1	LOW QUALITY PROTEIN: chromodomain-helicase-DNA-binding protein Mi-2 homolog [Penaeus vannamei]	95.94	0	2398	GO:0000003,GO:0000118,GO:0000122,GO:0000228,GO:0000785,GO:0000790,GO:0003674,GO:0003676,GO:0003677,GO:0003682,GO:0003824,GO:0004386,GO:0005488,GO:0005515,GO:0005575,GO:0005622,GO:0005623,GO:0005634,GO:0005654,GO:0005694,GO:0005700,GO:0006323,GO:0006325,GO:0006333,GO:0006338,GO:0006355,GO:0006357,GO:0006996,GO:0007063,GO:0007276,GO:0007283,GO:0008150,GO:0008270,GO:0009889,GO:0009890,GO:0009892,GO:…	B
Mj-23298	XP_027220544.1	LOW QUALITY PROTEIN: chromodomain-helicase-DNA-binding protein Mi-2 homolog [Penaeus vannamei]	96.49	0	2414	GO:0000003,GO:0000118,GO:0000122,GO:0000228,GO:0000785,GO:0000790,GO:0003674,GO:0003676,GO:0003677,GO:0003682,GO:0003824,GO:0004386,GO:0005488,GO:0005515,GO:0005575,GO:0005622,GO:0005623,GO:0005634,GO:0005654,GO:0005694,GO:0005700,GO:0006323,GO:0006325,GO:0006333,GO:0006338,GO:0006355,GO:0006357,GO:0006996,GO:0007063,GO:0007276,GO:0007283,GO:0008150,GO:0008270,GO:0009889,GO:0009890,GO:0009892,GO:…	B
Mj-23354	XP_027208796.1	uncharacterized protein LOC113802423 isoform X1 [Penaeus vannamei]	96.94	0	734	#N/A	T
Mj-23358	XP_027208796.1	uncharacterized protein LOC113802423 isoform X1 [Penaeus vannamei]	96.94	0	734	#N/A	T
Mj-23402	ROT69447.1	phospholipid scramblase 1 [Penaeus vannamei]	67.33	1e-42	149	#N/A	#N/A
Mj-23423	AOC37840.1	profilin, partial [Penaeus vannamei]	70.4	2e-57	190	#N/A	Z
Mj-23427	#N/A	#N/A	#N/A	#N/A	#N/A	#N/A	#N/A
Mj-2347	#N/A	#N/A	#N/A	#N/A	#N/A	#N/A	#N/A
Mj-23551	ROT73884.1	putative neurofilament heavy polypeptide [Penaeus vannamei]	89.01	1e-51	169	GO:0000027,GO:0002181,GO:0003674,GO:0003676,GO:0003723,GO:0003735,GO:0005198,GO:0005488,GO:0005575,GO:0005622,GO:0005623,GO:0005737,GO:0005829,GO:0005840,GO:0006412,GO:0006518,GO:0006807,GO:0006996,GO:0008150,GO:0008152,GO:0009058,GO:0009059,GO:0009987,GO:0010467,GO:0015934,GO:0016043,GO:0019538,GO:0022607,GO:0022613,GO:0022618,GO:0022625,GO:0022626,GO:0032991,GO:0034622,GO:0034641,GO:0034645,GO:…	J
Mj-23553	XP_027236592.1	serine/threonine-protein kinase Tao-like [Penaeus vannamei]	99.7	0	696	#N/A	T
Mj-23554	XP_027236589.1	LOW QUALITY PROTEIN: serine/threonine-protein kinase Tao-like [Penaeus vannamei]	96.78	0	1436	#N/A	T
Mj-23706	#N/A	#N/A	#N/A	#N/A	#N/A	GO:0000118,GO:0000122,GO:0000228,GO:0000785,GO:0000790,GO:0003674,GO:0005488,GO:0005515,GO:0005575,GO:0005622,GO:0005623,GO:0005634,GO:0005654,GO:0005694,GO:0006325,GO:0006355,GO:0006357,GO:0006464,GO:0006476,GO:0006807,GO:0006996,GO:0008150,GO:0008152,GO:0009889,GO:0009890,GO:0009892,GO:0009987,GO:0010468,GO:0010556,GO:0010558,GO:0010605,GO:0010629,GO:0016043,GO:0016569,GO:0016570,GO:0016575,GO:…	DK
Mj-23749	XP_027222230.1	uncharacterized protein LOC113814380 [Penaeus vannamei]	86.94	5e-177	530	#N/A	#N/A
Mj-23779	ANA91278.1	ALF-A1 [Penaeus japonicus]	100	2e-99	289	#N/A	#N/A	AMPs and lysozyme-related
Mj-2378	XP_027214610.1	LOW QUALITY PROTEIN: putative uncharacterized oxidoreductase C513.07 [Penaeus vannamei]	95.14	0	688	#N/A	V
Mj-23791	XP_027207270.1	uncharacterized protein LOC113800661 [Penaeus vannamei]	70.99	0	793	#N/A	O
Mj-23793	XP_027207270.1	uncharacterized protein LOC113800661 [Penaeus vannamei]	64.99	0	1194	#N/A	O
Mj-23805	XP_027239648.1	activating signal cointegrator 1-like [Penaeus vannamei]	79.94	0	534	GO:0003674,GO:0003712,GO:0003713,GO:0005575,GO:0005622,GO:0005623,GO:0005634,GO:0006355,GO:0008150,GO:0009889,GO:0009891,GO:0009893,GO:0010468,GO:0010556,GO:0010557,GO:0010604,GO:0010628,GO:0019219,GO:0019222,GO:0031323,GO:0031325,GO:0031326,GO:0031328,GO:0043226,GO:0043227,GO:0043229,GO:0043231,GO:0044424,GO:0044464,GO:0045893,GO:0045935,GO:0048518,GO:0048522,GO:0050789,GO:0050794,GO:0051171,GO:…	K
Mj-23816	XP_027220532.1	phenoloxidase-activating factor 2-like [Penaeus vannamei]	86.16	0	836	#N/A	O	melanization-related
Mj-23817	XP_027220532.1	phenoloxidase-activating factor 2-like [Penaeus vannamei]	85.83	0	832	#N/A	O	melanization-related
Mj-23864	XP_027223683.1	protein ABHD13-like [Penaeus vannamei]	97.47	0	747	#N/A	S
Mj-23888	XP_027237570.1	1-phosphatidylinositol 4,5-bisphosphate phosphodiesterase classes I and II-like [Penaeus vannamei]	93.9	0	2070	GO:0007610,GO:0007626,GO:0007629,GO:0008150,GO:0008344,GO:0009314,GO:0009416,GO:0009605,GO:0009628,GO:0009648,GO:0009649,GO:0009987,GO:0010646,GO:0019725,GO:0023051,GO:0030534,GO:0032501,GO:0042592,GO:0042752,GO:0043153,GO:0050789,GO:0050794,GO:0050804,GO:0050896,GO:0060249,GO:0065007,GO:0065008,GO:0070050,GO:0099177,GO:1900073	I
Mj-23889	XP_027237570.1	1-phosphatidylinositol 4,5-bisphosphate phosphodiesterase classes I and II-like [Penaeus vannamei]	93.67	0	2064	GO:0007610,GO:0007626,GO:0007629,GO:0008150,GO:0008344,GO:0009314,GO:0009416,GO:0009605,GO:0009628,GO:0009648,GO:0009649,GO:0009987,GO:0010646,GO:0019725,GO:0023051,GO:0030534,GO:0032501,GO:0042592,GO:0042752,GO:0043153,GO:0050789,GO:0050794,GO:0050804,GO:0050896,GO:0060249,GO:0065007,GO:0065008,GO:0070050,GO:0099177,GO:1900073	I
Mj-23891	#N/A	#N/A	#N/A	#N/A	#N/A	#N/A	#N/A
Mj-23892	XP_027229721.1	uncharacterized protein LOC113821425 isoform X3 [Penaeus vannamei]	93.59	0	1078	GO:0000785,GO:0003674,GO:0003682,GO:0005488,GO:0005515,GO:0005575,GO:0005622,GO:0005623,GO:0005634,GO:0005694,GO:0005700,GO:0006325,GO:0006342,GO:0006355,GO:0006996,GO:0008150,GO:0009889,GO:0009890,GO:0009892,GO:0009987,GO:0010468,GO:0010556,GO:0010558,GO:0010605,GO:0010629,GO:0016043,GO:0016458,GO:0019219,GO:0019222,GO:0031056,GO:0031323,GO:0031324,GO:0031326,GO:0031327,GO:0031399,GO:0032268,GO:…	S
Mj-23906	XP_027210968.1	60S ribosomal protein L8-like [Penaeus vannamei]	97.68	0	513	GO:0002181,GO:0003674,GO:0003676,GO:0003723,GO:0003735,GO:0005198,GO:0005488,GO:0005575,GO:0005622,GO:0005623,GO:0005634,GO:0005730,GO:0005737,GO:0005829,GO:0005840,GO:0006412,GO:0006518,GO:0006807,GO:0008150,GO:0008152,GO:0009058,GO:0009059,GO:0009987,GO:0010467,GO:0015934,GO:0019538,GO:0022625,GO:0022626,GO:0031974,GO:0031981,GO:0032991,GO:0034641,GO:0034645,GO:0043043,GO:0043170,GO:0043226,GO:…	J
Mj-23908	XP_027234284.1	protein SON-like [Penaeus vannamei]	90.93	0	745	GO:0003674,GO:0003676,GO:0003723,GO:0003725,GO:0005488,GO:0097159,GO:1901363	A
Mj-23911	XP_027218325.1	LOW QUALITY PROTEIN: transcription elongation factor SPT6-like [Penaeus vannamei]	98.57	0	2340	#N/A	K
Mj-23959	ROT82440.1	hypothetical protein C7M84_024399 [Penaeus vannamei]	94.4	0	733	GO:0003674,GO:0003824,GO:0004335,GO:0005575,GO:0005576,GO:0005615,GO:0005622,GO:0005623,GO:0005737,GO:0005975,GO:0005996,GO:0006012,GO:0006793,GO:0006796,GO:0008150,GO:0008152,GO:0009987,GO:0016020,GO:0016301,GO:0016310,GO:0016740,GO:0016772,GO:0016773,GO:0019200,GO:0019318,GO:0031982,GO:0043226,GO:0043227,GO:0043230,GO:0044237,GO:0044238,GO:0044262,GO:0044281,GO:0044421,GO:0044424,GO:0044464,GO:…	G
Mj-2398	AAQ92356.1	serine proteinase [Penaeus vannamei]	65.53	2e-133	399	GO:0003674,GO:0003824,GO:0004175,GO:0004252,GO:0006508,GO:0006807,GO:0008150,GO:0008152,GO:0008233,GO:0008236,GO:0016787,GO:0017171,GO:0019538,GO:0043170,GO:0044238,GO:0070011,GO:0071704,GO:0140096,GO:1901564	O
Mj-24001	XP_027226597.1	LOW QUALITY PROTEIN: tribbles homolog 2-like [Penaeus vannamei]	94.22	2e-152	441	#N/A	T
Mj-24074	XP_027206638.1	uncharacterized protein LOC113800109 isoform X1 [Penaeus vannamei]	71.84	7e-44	145	#N/A	#N/A
Mj-24075	XP_027206638.1	uncharacterized protein LOC113800109 isoform X1 [Penaeus vannamei]	69.9	5e-42	140	#N/A	#N/A
Mj-24108	XP_027212598.1	calcium-transporting ATPase sarcoplasmic/endoplasmic reticulum type-like isoform X1 [Penaeus vannamei]	85.39	0	1772	GO:0000003,GO:0002064,GO:0002065,GO:0002066,GO:0003006,GO:0003008,GO:0003013,GO:0003015,GO:0003674,GO:0003824,GO:0005215,GO:0005388,GO:0005488,GO:0005515,GO:0005575,GO:0005622,GO:0005623,GO:0005737,GO:0005783,GO:0005789,GO:0006082,GO:0006629,GO:0006631,GO:0006635,GO:0006810,GO:0006811,GO:0006812,GO:0006816,GO:0006873,GO:0006874,GO:0006875,GO:0007154,GO:0007267,GO:0007268,GO:0007274,GO:0007276,GO:…	P
Mj-24117	#N/A	#N/A	#N/A	#N/A	#N/A	#N/A	#N/A
Mj-24141	XP_027239093.1	myosin heavy chain, non-muscle-like [Penaeus vannamei]	98.96	0	3316	GO:0000003,GO:0000278,GO:0000281,GO:0000910,GO:0001654,GO:0001655,GO:0001667,GO:0001700,GO:0001736,GO:0001738,GO:0001745,GO:0001894,GO:0002009,GO:0002064,GO:0002065,GO:0002066,GO:0002165,GO:0003002,GO:0003006,GO:0003008,GO:0003012,GO:0003674,GO:0003774,GO:0003824,GO:0005488,GO:0005515,GO:0005575,GO:0005622,GO:0005623,GO:0005737,GO:0005826,GO:0005856,GO:0005886,GO:0005911,GO:0005938,GO:0006928,GO:…	Z	phagocytosis-related
Mj-24143	XP_027239093.1	myosin heavy chain, non-muscle-like [Penaeus vannamei]	96.63	0	3356	GO:0000003,GO:0000278,GO:0000281,GO:0000910,GO:0001654,GO:0001655,GO:0001667,GO:0001700,GO:0001736,GO:0001738,GO:0001745,GO:0001894,GO:0002009,GO:0002064,GO:0002065,GO:0002066,GO:0002165,GO:0003002,GO:0003006,GO:0003008,GO:0003012,GO:0003674,GO:0003774,GO:0003824,GO:0005488,GO:0005515,GO:0005575,GO:0005622,GO:0005623,GO:0005737,GO:0005826,GO:0005856,GO:0005886,GO:0005911,GO:0005938,GO:0006928,GO:…	Z	phagocytosis-related
Mj-24190	BAW78902.1	single VWC domain protein 5 [Penaeus japonicus]	91.26	3e-62	192	#N/A	#N/A	immune-related
Mj-24191	BAW78902.1	single VWC domain protein 5 [Penaeus japonicus]	95.15	1e-66	204	#N/A	#N/A	immune-related
Mj-24192	BAW78902.1	single VWC domain protein 5 [Penaeus japonicus]	92.23	3e-63	195	#N/A	#N/A	immune-related
Mj-24193	BAW78902.1	single VWC domain protein 5 [Penaeus japonicus]	88.35	1e-60	188	#N/A	#N/A	immune-related
Mj-2420	#N/A	#N/A	#N/A	#N/A	#N/A	#N/A	#N/A
Mj-24216	XP_027234611.1	uncharacterized protein LOC113825950 [Penaeus vannamei]	69.64	6e-40	144	#N/A	#N/A
Mj-24223	BBC20610.1	hypothetical protein [Penaeus japonicus]	91.84	6e-74	230	#N/A	#N/A
Mj-24226	#N/A	#N/A	#N/A	#N/A	#N/A	#N/A	#N/A
Mj-24232	ROT80797.1	putative sodium-coupled monocarboxylate transporter 1-like [Penaeus vannamei]	79.17	0	855	#N/A	P
Mj-24276	XP_027232619.1	innexin inx2-like isoform X1 [Penaeus vannamei]	50.41	4e-134	401	#N/A	P
Mj-2428	XP_027214544.1	F-box only protein 31-like [Penaeus vannamei]	62.37	5e-171	499	#N/A	S
Mj-24302	ROT77822.1	Kazal-type proteinase inhibitor [Penaeus vannamei]	67.54	5e-47	156	#N/A	#N/A	crayfish hemocyte marker
Mj-24303	ROT77823.1	hemocyte kazal-type proteinase inhibitor [Penaeus vannamei]	65.4	6e-117	342	#N/A	#N/A	crayfish hemocyte marker
Mj-24334	ANJ03341.1	vascular endothelial growth factor 3 [Penaeus vannamei]	58.33	4e-73	231	#N/A	#N/A	cell growth-related
Mj-24336	XP_037780281.1	ribosome-binding protein 1-like [Penaeus monodon]	89.25	0	1018	GO:0005575,GO:0005622,GO:0005623,GO:0005737,GO:0005783,GO:0005789,GO:0005840,GO:0006412,GO:0006518,GO:0006807,GO:0008150,GO:0008152,GO:0009058,GO:0009059,GO:0009987,GO:0010467,GO:0012505,GO:0016020,GO:0016021,GO:0019538,GO:0030176,GO:0031224,GO:0031227,GO:0031984,GO:0032991,GO:0034641,GO:0034645,GO:0042175,GO:0043043,GO:0043170,GO:0043226,GO:0043227,GO:0043228,GO:0043229,GO:0043231,GO:0043232,GO:…	#N/A
Mj-24372	#N/A	#N/A	#N/A	#N/A	#N/A	#N/A	#N/A
Mj-24381	XP_027214610.1	LOW QUALITY PROTEIN: putative uncharacterized oxidoreductase C513.07 [Penaeus vannamei]	87.07	4e-84	264	GO:0007498,GO:0008150,GO:0009888,GO:0032502,GO:0048856	I
Mj-24416	XP_027224009.1	exocyst complex component 7-like [Penaeus vannamei]	96.61	0	1347	GO:0000145,GO:0001505,GO:0003674,GO:0005488,GO:0005515,GO:0005543,GO:0005546,GO:0005575,GO:0005622,GO:0005623,GO:0005737,GO:0005938,GO:0006810,GO:0006836,GO:0006887,GO:0006903,GO:0006904,GO:0007154,GO:0007267,GO:0007268,GO:0007269,GO:0008013,GO:0008150,GO:0008289,GO:0009987,GO:0016079,GO:0016080,GO:0016081,GO:0016192,GO:0017156,GO:0022406,GO:0023052,GO:0023061,GO:0032940,GO:0032991,GO:0035091,GO:…	U
Mj-24417	XP_027222910.1	sodium/calcium exchanger 3-like [Penaeus vannamei]	91.14	0	1112	#N/A	P
Mj-24471	XP_027237840.1	CLK4-associating serine/arginine rich protein-like [Penaeus vannamei]	79.13	1e-49	192	#N/A	#N/A
Mj-245	XP_027208077.1	protein CLEC16A homolog isoform X1 [Penaeus vannamei]	97.49	0	2058	GO:0003674,GO:0005488,GO:0005515,GO:0005575,GO:0005622,GO:0005623,GO:0005737,GO:0005768,GO:0005770,GO:0005794,GO:0006810,GO:0007034,GO:0007041,GO:0008150,GO:0008333,GO:0012505,GO:0016020,GO:0016021,GO:0016192,GO:0016197,GO:0017016,GO:0017137,GO:0019899,GO:0031224,GO:0031267,GO:0031410,GO:0031982,GO:0043226,GO:0043227,GO:0043229,GO:0043231,GO:0044424,GO:0044425,GO:0044444,GO:0044464,GO:0046907,GO:…	S
Mj-24587	#N/A	#N/A	#N/A	#N/A	#N/A	GO:0000149,GO:0001505,GO:0003674,GO:0005484,GO:0005488,GO:0005515,GO:0005575,GO:0005622,GO:0005623,GO:0005737,GO:0005886,GO:0006810,GO:0006836,GO:0006886,GO:0006887,GO:0006904,GO:0006906,GO:0006996,GO:0007154,GO:0007267,GO:0007268,GO:0007269,GO:0008104,GO:0008150,GO:0009987,GO:0012505,GO:0015031,GO:0015833,GO:0016020,GO:0016021,GO:0016043,GO:0016050,GO:0016079,GO:0016081,GO:0016192,GO:0017156,GO:…	U
Mj-24627	ROT76230.1	hypothetical protein C7M84_005184 [Penaeus vannamei]	76.44	2e-132	408	GO:0000003,GO:0000375,GO:0000377,GO:0000381,GO:0000398,GO:0001654,GO:0003006,GO:0005575,GO:0005622,GO:0005623,GO:0005634,GO:0005654,GO:0005681,GO:0005737,GO:0005829,GO:0006139,GO:0006396,GO:0006397,GO:0006403,GO:0006405,GO:0006406,GO:0006611,GO:0006725,GO:0006807,GO:0006810,GO:0006886,GO:0006913,GO:0007275,GO:0007423,GO:0007530,GO:0007548,GO:0008104,GO:0008150,GO:0008152,GO:0008380,GO:0009987,GO:…	A
Mj-24641	AGG55290.1	ribosomal protein L18 [Penaeus vannamei]	95.21	7e-128	363	GO:0002181,GO:0003674,GO:0003676,GO:0003723,GO:0003735,GO:0005198,GO:0005488,GO:0005575,GO:0005622,GO:0005623,GO:0005737,GO:0005829,GO:0005840,GO:0006412,GO:0006518,GO:0006807,GO:0008150,GO:0008152,GO:0009058,GO:0009059,GO:0009987,GO:0010467,GO:0015934,GO:0019538,GO:0022625,GO:0022626,GO:0032991,GO:0034641,GO:0034645,GO:0043043,GO:0043170,GO:0043226,GO:0043228,GO:0043229,GO:0043232,GO:0043603,GO:…	J
Mj-24669	XP_027213076.1	uncharacterized protein DDB_G0271670-like [Penaeus vannamei]	67.36	3e-35	134	#N/A	#N/A
Mj-24745	XP_027215532.1	uncharacterized peptidase C1-like protein F26E4.3, partial [Penaeus vannamei]	82.11	0	608	GO:0003674,GO:0005488,GO:0005515,GO:0005575,GO:0005576,GO:0005615,GO:0005623,GO:0007155,GO:0008104,GO:0008150,GO:0009966,GO:0009967,GO:0010646,GO:0010647,GO:0017147,GO:0022610,GO:0023051,GO:0023056,GO:0030111,GO:0030177,GO:0030312,GO:0033036,GO:0035592,GO:0035593,GO:0042600,GO:0044421,GO:0044464,GO:0045184,GO:0048518,GO:0048522,GO:0048583,GO:0048584,GO:0050789,GO:0050794,GO:0051179,GO:0051234,GO:…	S
Mj-248	XP_027211850.1	bromodomain-containing protein 3-like isoform X1 [Penaeus vannamei]	99.15	0	1188	GO:0000578,GO:0000902,GO:0000904,GO:0003002,GO:0005575,GO:0005622,GO:0005623,GO:0005634,GO:0006355,GO:0006357,GO:0007275,GO:0007350,GO:0007351,GO:0007354,GO:0007362,GO:0007389,GO:0007399,GO:0008150,GO:0008595,GO:0009653,GO:0009790,GO:0009798,GO:0009880,GO:0009889,GO:0009890,GO:0009891,GO:0009892,GO:0009893,GO:0009948,GO:0009952,GO:0009987,GO:0010468,GO:0010556,GO:0010557,GO:0010558,GO:0010604,GO:…	K
Mj-24812	#N/A	#N/A	#N/A	#N/A	#N/A	#N/A	#N/A
Mj-249	ROT84324.1	hypothetical protein C7M84_022486 [Penaeus vannamei]	73.73	0	646	#N/A	#N/A
Mj-24907	QDX01885.1	ML protein [Penaeus japonicus]	100	6e-97	296	#N/A	#N/A	immune-related
Mj-2492	BAI50776.1	serine proteinase inhibitor [Penaeus japonicus]	99.51	0	788	GO:0002009,GO:0002165,GO:0003674,GO:0004857,GO:0004866,GO:0004867,GO:0005575,GO:0005576,GO:0005615,GO:0007275,GO:0007444,GO:0007472,GO:0007476,GO:0007552,GO:0007560,GO:0008150,GO:0008592,GO:0009605,GO:0009607,GO:0009620,GO:0009653,GO:0009791,GO:0009886,GO:0009887,GO:0009888,GO:0009892,GO:0009966,GO:0009968,GO:0010466,GO:0010605,GO:0010646,GO:0010648,GO:0010951,GO:0019222,GO:0023051,GO:0023057,GO:…	V
Mj-24931	XP_027232497.1	E3 ubiquitin-protein ligase HUWE1-like [Penaeus vannamei]	96.08	0	4476	GO:0003674,GO:0003824,GO:0004842,GO:0005575,GO:0005622,GO:0005623,GO:0005634,GO:0005737,GO:0006403,GO:0006464,GO:0006807,GO:0006810,GO:0008150,GO:0008152,GO:0009987,GO:0015931,GO:0016567,GO:0016740,GO:0019538,GO:0019787,GO:0032446,GO:0033036,GO:0033227,GO:0036211,GO:0043170,GO:0043226,GO:0043227,GO:0043229,GO:0043231,GO:0043412,GO:0044237,GO:0044238,GO:0044260,GO:0044267,GO:0044424,GO:0044464,GO:…	O
Mj-24932	XP_027232497.1	E3 ubiquitin-protein ligase HUWE1-like [Penaeus vannamei]	95.54	0	4438	GO:0003674,GO:0003824,GO:0004842,GO:0005575,GO:0005622,GO:0005623,GO:0005634,GO:0005737,GO:0006403,GO:0006464,GO:0006807,GO:0006810,GO:0008150,GO:0008152,GO:0009987,GO:0015931,GO:0016567,GO:0016740,GO:0019538,GO:0019787,GO:0032446,GO:0033036,GO:0033227,GO:0036211,GO:0043170,GO:0043226,GO:0043227,GO:0043229,GO:0043231,GO:0043412,GO:0044237,GO:0044238,GO:0044260,GO:0044267,GO:0044424,GO:0044464,GO:…	O
Mj-2496	#N/A	#N/A	#N/A	#N/A	#N/A	#N/A	#N/A
Mj-24986	ROT84476.1	eukaryotic translation initiation factor 3 subunit G [Penaeus vannamei]	98.63	2e-170	492	GO:0003674,GO:0003676,GO:0003723,GO:0003729,GO:0003743,GO:0005488,GO:0005575,GO:0005622,GO:0005623,GO:0005737,GO:0005852,GO:0006412,GO:0006413,GO:0006518,GO:0006807,GO:0008135,GO:0008150,GO:0008152,GO:0009058,GO:0009059,GO:0009987,GO:0010467,GO:0019538,GO:0032991,GO:0034641,GO:0034645,GO:0043043,GO:0043170,GO:0043603,GO:0043604,GO:0044237,GO:0044238,GO:0044249,GO:0044260,GO:0044267,GO:0044271,GO:…	J
Mj-25	ROT78567.1	hypothetical protein C7M84_002714 [Penaeus vannamei]	87.47	0	4022	#N/A	#N/A
Mj-25072	ROT68465.1	Tubulin beta-1 chain [Penaeus vannamei]	100	0	822	#N/A	Z
Mj-25132	ROT65507.1	hypothetical protein C7M84_016538 [Penaeus vannamei]	99.71	0	715	GO:0000003,GO:0000932,GO:0002064,GO:0002065,GO:0002066,GO:0002682,GO:0002697,GO:0002831,GO:0003006,GO:0003008,GO:0003674,GO:0003676,GO:0003723,GO:0003724,GO:0003824,GO:0004004,GO:0004386,GO:0005488,GO:0005515,GO:0005575,GO:0005622,GO:0005623,GO:0005634,GO:0005730,GO:0005737,GO:0006139,GO:0006725,GO:0006807,GO:0006996,GO:0007275,GO:0007276,GO:0007277,GO:0007279,GO:0007281,GO:0007292,GO:0007349,GO:…	A
Mj-25195	ROT77829.1	putative trinucleotide repeat-containing 6A protein isoform X6 [Penaeus vannamei]	98.84	0	1147	GO:0000932,GO:0001700,GO:0003674,GO:0005488,GO:0005515,GO:0005575,GO:0005622,GO:0005623,GO:0005737,GO:0006139,GO:0006401,GO:0006402,GO:0006725,GO:0006807,GO:0007275,GO:0007610,GO:0007622,GO:0007623,GO:0007626,GO:0008150,GO:0008152,GO:0009056,GO:0009057,GO:0009790,GO:0009792,GO:0009892,GO:0009987,GO:0010468,GO:0010605,GO:0010608,GO:0010629,GO:0016070,GO:0016071,GO:0016441,GO:0016458,GO:0019222,GO:…	A
Mj-25198	XP_027210480.1	trinucleotide repeat-containing gene 6B protein-like [Penaeus vannamei]	99.08	0	1208	GO:0000932,GO:0001700,GO:0003674,GO:0005488,GO:0005515,GO:0005575,GO:0005622,GO:0005623,GO:0005737,GO:0006139,GO:0006401,GO:0006402,GO:0006725,GO:0006807,GO:0007275,GO:0007610,GO:0007622,GO:0007623,GO:0007626,GO:0008150,GO:0008152,GO:0009056,GO:0009057,GO:0009790,GO:0009792,GO:0009892,GO:0009987,GO:0010468,GO:0010605,GO:0010608,GO:0010629,GO:0016070,GO:0016071,GO:0016441,GO:0016458,GO:0019222,GO:…	A
Mj-25225	XP_027209139.1	beta-1,4-N-acetylgalactosaminyltransferase bre-4-like [Penaeus vannamei]	92.22	0	662	GO:0003674,GO:0003824,GO:0005575,GO:0005622,GO:0005623,GO:0005737,GO:0005794,GO:0006040,GO:0006044,GO:0006629,GO:0006643,GO:0006664,GO:0006665,GO:0006687,GO:0006688,GO:0006807,GO:0007528,GO:0007610,GO:0007626,GO:0008150,GO:0008152,GO:0008194,GO:0008344,GO:0008376,GO:0008610,GO:0009058,GO:0009247,GO:0009987,GO:0012505,GO:0016043,GO:0016740,GO:0016757,GO:0016758,GO:0030148,GO:0030534,GO:0032501,GO:…	G
Mj-25231	ROT71629.1	Mediator of RNA polymerase II transcription subunit 16 [Penaeus vannamei]	76.11	8e-121	391	#N/A	#N/A
Mj-25275	ROT78688.1	ribosomal protein S3a [Penaeus vannamei]	99.19	0	511	GO:0002181,GO:0003674,GO:0003735,GO:0005198,GO:0005575,GO:0005622,GO:0005623,GO:0005737,GO:0005829,GO:0005840,GO:0006412,GO:0006518,GO:0006807,GO:0008150,GO:0008152,GO:0009058,GO:0009059,GO:0009987,GO:0010467,GO:0015935,GO:0019538,GO:0022626,GO:0022627,GO:0032991,GO:0034641,GO:0034645,GO:0043043,GO:0043170,GO:0043226,GO:0043228,GO:0043229,GO:0043232,GO:0043603,GO:0043604,GO:0044237,GO:0044238,GO:…	J
Mj-2529	XP_027239648.1	activating signal cointegrator 1-like [Penaeus vannamei]	88.1	0	893	GO:0003674,GO:0003712,GO:0003713,GO:0005575,GO:0005622,GO:0005623,GO:0005634,GO:0006355,GO:0008150,GO:0009889,GO:0009891,GO:0009893,GO:0010468,GO:0010556,GO:0010557,GO:0010604,GO:0010628,GO:0019219,GO:0019222,GO:0031323,GO:0031325,GO:0031326,GO:0031328,GO:0043226,GO:0043227,GO:0043229,GO:0043231,GO:0044424,GO:0044464,GO:0045893,GO:0045935,GO:0048518,GO:0048522,GO:0050789,GO:0050794,GO:0051171,GO:…	K
Mj-25323	#N/A	#N/A	#N/A	#N/A	#N/A	#N/A	#N/A
Mj-25326	#N/A	#N/A	#N/A	#N/A	#N/A	#N/A	#N/A
Mj-25445	XP_027231266.1	uncharacterized protein LOC113822926 [Penaeus vannamei]	85.25	0	2984	GO:0000209,GO:0003674,GO:0003824,GO:0004842,GO:0005575,GO:0005622,GO:0005623,GO:0005634,GO:0005730,GO:0005737,GO:0005773,GO:0005829,GO:0006464,GO:0006508,GO:0006511,GO:0006807,GO:0007275,GO:0007399,GO:0008150,GO:0008152,GO:0009056,GO:0009057,GO:0009987,GO:0010721,GO:0010769,GO:0010771,GO:0016567,GO:0016740,GO:0019538,GO:0019787,GO:0019941,GO:0022008,GO:0022603,GO:0022604,GO:0030154,GO:0030163,GO:…	O
Mj-25448	XP_027231266.1	uncharacterized protein LOC113822926 [Penaeus vannamei]	79.68	0	2883	GO:0000209,GO:0003674,GO:0003824,GO:0004842,GO:0005575,GO:0005622,GO:0005623,GO:0005634,GO:0005730,GO:0005737,GO:0005773,GO:0005829,GO:0006464,GO:0006508,GO:0006511,GO:0006807,GO:0007275,GO:0007399,GO:0008150,GO:0008152,GO:0009056,GO:0009057,GO:0009987,GO:0010721,GO:0010769,GO:0010771,GO:0016567,GO:0016740,GO:0019538,GO:0019787,GO:0019941,GO:0022008,GO:0022603,GO:0022604,GO:0030154,GO:0030163,GO:…	O
Mj-25546	XP_027235220.1	LOW QUALITY PROTEIN: mitogen-activated protein kinase kinase kinase 7-interacting protein 3 homolog [Penaeus vannamei]	94.48	0	712	#N/A	#N/A
Mj-25608	ROT74107.1	putative growth hormone secretagogue receptor type 1 [Penaeus vannamei]	48.35	5e-35	129	#N/A	T	cell growth-related
Mj-25649	XP_027237857.1	forkhead box protein K2-like [Penaeus vannamei]	99.53	0	1096	GO:0000981,GO:0002252,GO:0002376,GO:0003674,GO:0003700,GO:0005575,GO:0005622,GO:0005623,GO:0005634,GO:0006355,GO:0006357,GO:0006950,GO:0006952,GO:0007154,GO:0007267,GO:0007275,GO:0007494,GO:0007495,GO:0008150,GO:0009605,GO:0009607,GO:0009615,GO:0009653,GO:0009889,GO:0009893,GO:0009987,GO:0010468,GO:0010556,GO:0010604,GO:0010628,GO:0019219,GO:0019222,GO:0023052,GO:0030154,GO:0031323,GO:0031326,GO:…	K
Mj-25655	XP_027228115.1	uncharacterized protein LOC113820059 [Penaeus vannamei]	93.29	0	825	GO:0003674,GO:0003824,GO:0004367,GO:0005575,GO:0005622,GO:0005623,GO:0005737,GO:0005829,GO:0006066,GO:0006067,GO:0006629,GO:0006638,GO:0006639,GO:0006641,GO:0006950,GO:0007610,GO:0007626,GO:0007629,GO:0008150,GO:0008152,GO:0008344,GO:0009628,GO:0009987,GO:0016491,GO:0016614,GO:0016616,GO:0016999,GO:0017144,GO:0030016,GO:0030017,GO:0030018,GO:0030534,GO:0031430,GO:0031672,GO:0031674,GO:0032501,GO:…	C
Mj-25675	ROT78492.1	hypothetical protein C7M84_002788 [Penaeus vannamei]	44.13	1e-148	486	#N/A	#N/A
Mj-25685	XP_027217774.1	TBC1 domain family member 2B-like [Penaeus vannamei]	93.4	0	1931	GO:0003674,GO:0005096,GO:0005488,GO:0005515,GO:0005575,GO:0005622,GO:0005623,GO:0005634,GO:0005737,GO:0005768,GO:0005770,GO:0005829,GO:0006810,GO:0006886,GO:0008047,GO:0008104,GO:0008150,GO:0012505,GO:0015031,GO:0015833,GO:0016192,GO:0017016,GO:0017137,GO:0019899,GO:0030054,GO:0030234,GO:0030695,GO:0031267,GO:0031338,GO:0031410,GO:0031982,GO:0032386,GO:0032388,GO:0032879,GO:0033036,GO:0033043,GO:…	C
Mj-25701	XP_027236418.1	uncharacterized protein LOC113827724, partial [Penaeus vannamei]	83.92	0	782	GO:0000151,GO:0003674,GO:0005488,GO:0005515,GO:0005575,GO:0005622,GO:0005623,GO:0005737,GO:0005829,GO:0006508,GO:0006511,GO:0006807,GO:0007275,GO:0007399,GO:0008150,GO:0008152,GO:0009056,GO:0009057,GO:0009987,GO:0010498,GO:0019005,GO:0019222,GO:0019538,GO:0019899,GO:0019941,GO:0022008,GO:0030154,GO:0030162,GO:0030163,GO:0031461,GO:0031625,GO:0032501,GO:0032502,GO:0032991,GO:0043161,GO:0043170,GO:…	S
Mj-25733	#N/A	#N/A	#N/A	#N/A	#N/A	#N/A	#N/A
Mj-25740	ROT83060.1	mitochondrial cytochrome c oxidase subunit Va [Penaeus vannamei]	97.39	6e-103	315	#N/A	C
Mj-25795	XP_037780070.1	uncharacterized protein LOC119576432 [Penaeus monodon]	90.83	5e-60	198	#N/A	#N/A
Mj-25796	XP_037780069.1	uncharacterized protein LOC119576431 [Penaeus monodon]	88.33	6e-56	187	#N/A	#N/A
Mj-2582	XP_027236710.1	LOW QUALITY PROTEIN: general transcription factor IIF subunit 1-like [Penaeus vannamei]	90.38	4e-117	370	GO:0000428,GO:0001085,GO:0001091,GO:0001096,GO:0001098,GO:0001099,GO:0003674,GO:0005488,GO:0005515,GO:0005575,GO:0005622,GO:0005623,GO:0005634,GO:0005654,GO:0005667,GO:0005674,GO:0006139,GO:0006351,GO:0006352,GO:0006354,GO:0006355,GO:0006357,GO:0006366,GO:0006367,GO:0006368,GO:0006725,GO:0006807,GO:0008134,GO:0008150,GO:0008152,GO:0009058,GO:0009059,GO:0009889,GO:0009891,GO:0009893,GO:0009987,GO:…	K
Mj-2587	ROT83636.1	hypothetical protein C7M84_023169 [Penaeus vannamei]	91.79	0	751	GO:0000003,GO:0000737,GO:0003006,GO:0003674,GO:0003824,GO:0004518,GO:0004519,GO:0004520,GO:0004531,GO:0004536,GO:0005575,GO:0005622,GO:0005623,GO:0006139,GO:0006259,GO:0006308,GO:0006309,GO:0006725,GO:0006807,GO:0006915,GO:0006921,GO:0007276,GO:0007281,GO:0007292,GO:0008150,GO:0008152,GO:0008219,GO:0009056,GO:0009057,GO:0009987,GO:0010623,GO:0012501,GO:0016043,GO:0016787,GO:0016788,GO:0016889,GO:…	L
Mj-25898	ROT69381.1	hypothetical protein C7M84_012435 [Penaeus vannamei]	82.7	0	586	GO:0000003,GO:0001655,GO:0001667,GO:0001932,GO:0001934,GO:0002009,GO:0002064,GO:0002065,GO:0002066,GO:0002164,GO:0002165,GO:0002376,GO:0002520,GO:0002682,GO:0003006,GO:0003674,GO:0003824,GO:0004672,GO:0004713,GO:0004714,GO:0004888,GO:0005021,GO:0005488,GO:0005515,GO:0005575,GO:0005623,GO:0005886,GO:0006464,GO:0006468,GO:0006793,GO:0006796,GO:0006807,GO:0006928,GO:0006950,GO:0006952,GO:0006955,GO:…	T
Mj-25911	ROT75943.1	hypothetical protein C7M84_005490 [Penaeus vannamei]	43.06	5e-42	154	#N/A	#N/A
Mj-25913	ROT75943.1	hypothetical protein C7M84_005490 [Penaeus vannamei]	43.06	2e-41	152	#N/A	#N/A
Mj-25919	QIA97676.1	inhibitor of apoptosis protein [Penaeus japonicus]	93.25	0	1155	GO:0000209,GO:0002020,GO:0002225,GO:0002682,GO:0002684,GO:0002697,GO:0002699,GO:0002700,GO:0002702,GO:0002759,GO:0002760,GO:0002784,GO:0002786,GO:0002803,GO:0002805,GO:0002807,GO:0002808,GO:0002813,GO:0002831,GO:0002833,GO:0002920,GO:0002922,GO:0003674,GO:0003824,GO:0004842,GO:0004857,GO:0004866,GO:0004869,GO:0005488,GO:0005515,GO:0005575,GO:0005622,GO:0005623,GO:0005634,GO:0005737,GO:0006464,GO:…	O
Mj-25950	AYN64331.1	thymosin 3 [Penaeus japonicus]	100	3e-80	250	#N/A	#N/A
Mj-25967	XP_027220398.1	muscleblind-like protein [Penaeus vannamei]	99.34	0	588	GO:0000003,GO:0000381,GO:0001654,GO:0001745,GO:0001751,GO:0001754,GO:0003674,GO:0003676,GO:0003677,GO:0005488,GO:0005575,GO:0005622,GO:0005623,GO:0005634,GO:0005737,GO:0006915,GO:0006996,GO:0007275,GO:0007399,GO:0007422,GO:0007423,GO:0007517,GO:0007525,GO:0007610,GO:0007617,GO:0007618,GO:0008150,GO:0008219,GO:0009653,GO:0009887,GO:0009987,GO:0010468,GO:0012501,GO:0016043,GO:0019098,GO:0019219,GO:…	K
Mj-25972	XP_027220398.1	muscleblind-like protein [Penaeus vannamei]	91.36	0	526	GO:0000003,GO:0000381,GO:0001654,GO:0001745,GO:0001751,GO:0001754,GO:0003674,GO:0003676,GO:0003677,GO:0005488,GO:0005575,GO:0005622,GO:0005623,GO:0005634,GO:0005737,GO:0006915,GO:0006996,GO:0007275,GO:0007399,GO:0007422,GO:0007423,GO:0007517,GO:0007525,GO:0007610,GO:0007617,GO:0007618,GO:0008150,GO:0008219,GO:0009653,GO:0009887,GO:0009987,GO:0010468,GO:0012501,GO:0016043,GO:0019098,GO:0019219,GO:…	K
Mj-25992	XP_027216334.1	LOW QUALITY PROTEIN: AP-2 complex subunit alpha-like [Penaeus vannamei]	96.05	0	1592	GO:0000003,GO:0000278,GO:0000281,GO:0000910,GO:0002064,GO:0002065,GO:0002066,GO:0003006,GO:0003674,GO:0005215,GO:0005575,GO:0005622,GO:0005623,GO:0005737,GO:0005886,GO:0005905,GO:0006810,GO:0006897,GO:0007049,GO:0007276,GO:0007281,GO:0007292,GO:0008104,GO:0008150,GO:0008356,GO:0008565,GO:0009888,GO:0009987,GO:0010324,GO:0012505,GO:0012506,GO:0015031,GO:0015833,GO:0016020,GO:0016043,GO:0016192,GO:…	U
Mj-26025	XP_027212137.1	uncharacterized protein LOC113805345 [Penaeus vannamei]	70.21	0	835	#N/A	S
Mj-26042	XP_027227797.1	protein bric-a-brac 2-like [Penaeus vannamei]	99.61	0	766	GO:0000003,GO:0000122,GO:0000902,GO:0000904,GO:0001667,GO:0002009,GO:0002064,GO:0002065,GO:0002066,GO:0002165,GO:0003006,GO:0003674,GO:0003700,GO:0005575,GO:0005622,GO:0005623,GO:0005634,GO:0006355,GO:0006357,GO:0006928,GO:0006935,GO:0007275,GO:0007276,GO:0007281,GO:0007292,GO:0007297,GO:0007298,GO:0007399,GO:0007409,GO:0007411,GO:0007417,GO:0007420,GO:0007423,GO:0007444,GO:0007472,GO:0007476,GO:…	S
Mj-26063	#N/A	#N/A	#N/A	#N/A	#N/A	#N/A	#N/A
Mj-26070	ROT79514.1	hypothetical protein C7M84_001778 [Penaeus vannamei]	78.29	1e-72	231	#N/A	#N/A
Mj-26072	ROT79514.1	hypothetical protein C7M84_001778 [Penaeus vannamei]	78.29	1e-70	232	#N/A	#N/A
Mj-26092	XP_027227244.1	set1/Ash2 histone methyltransferase complex subunit ASH2-like isoform X3 [Penaeus vannamei]	96.96	0	1078	GO:0000902,GO:0000904,GO:0001067,GO:0001932,GO:0001933,GO:0002009,GO:0002164,GO:0002165,GO:0002168,GO:0003002,GO:0003674,GO:0003676,GO:0003677,GO:0005488,GO:0005515,GO:0005575,GO:0005622,GO:0005623,GO:0005634,GO:0005654,GO:0005694,GO:0005700,GO:0005703,GO:0006325,GO:0006338,GO:0006355,GO:0006357,GO:0006464,GO:0006479,GO:0006807,GO:0006996,GO:0007275,GO:0007389,GO:0007399,GO:0007417,GO:0007420,GO:…	BK
Mj-26138	XP_027233623.1	LOW QUALITY PROTEIN: bifunctional heparan sulfate N-deacetylase/N-sulfotransferase-like [Penaeus vannamei]	95.95	0	1853	GO:0000003,GO:0000137,GO:0000271,GO:0001667,GO:0001704,GO:0001707,GO:0002009,GO:0002165,GO:0003002,GO:0003674,GO:0003824,GO:0005575,GO:0005622,GO:0005623,GO:0005737,GO:0005783,GO:0005794,GO:0005795,GO:0005975,GO:0005976,GO:0006022,GO:0006023,GO:0006024,GO:0006029,GO:0006790,GO:0006807,GO:0006810,GO:0006897,GO:0006928,GO:0006996,GO:0007005,GO:0007154,GO:0007165,GO:0007166,GO:0007167,GO:0007169,GO:…	O
Mj-26139	ROT73610.1	E3 ubiquitin-protein ligase [Penaeus vannamei]	94.69	0	1908	GO:0003674,GO:0005488,GO:0008270,GO:0043167,GO:0043169,GO:0046872,GO:0046914	O
Mj-2624	#N/A	#N/A	#N/A	#N/A	#N/A	#N/A	#N/A
Mj-26290	XP_027229509.1	40S ribosomal protein S24-like isoform X2 [Penaeus vannamei]	93.8	1e-83	249	GO:0000462,GO:0002181,GO:0003674,GO:0003735,GO:0005198,GO:0005575,GO:0005622,GO:0005623,GO:0005737,GO:0005829,GO:0005840,GO:0006139,GO:0006364,GO:0006396,GO:0006412,GO:0006518,GO:0006725,GO:0006807,GO:0008150,GO:0008152,GO:0009058,GO:0009059,GO:0009987,GO:0010467,GO:0015935,GO:0016070,GO:0016072,GO:0019538,GO:0022613,GO:0022626,GO:0022627,GO:0030490,GO:0032991,GO:0034470,GO:0034641,GO:0034645,GO:…	J
Mj-26293	XP_037780029.1	protein suppressor of forked-like [Penaeus monodon]	99.86	0	1471	GO:0003674,GO:0003676,GO:0003723,GO:0003729,GO:0005488,GO:0005575,GO:0005622,GO:0005623,GO:0005634,GO:0005654,GO:0005848,GO:0005849,GO:0006139,GO:0006379,GO:0006396,GO:0006725,GO:0006807,GO:0008150,GO:0008152,GO:0009893,GO:0009987,GO:0010467,GO:0016070,GO:0016071,GO:0019222,GO:0031123,GO:0031974,GO:0031981,GO:0032991,GO:0034641,GO:0043085,GO:0043170,GO:0043226,GO:0043227,GO:0043229,GO:0043231,GO:…	A
Mj-2631	ROT61238.1	hypothetical protein C7M84_021013 [Penaeus vannamei]	97.86	2e-171	491	#N/A	#N/A
Mj-26331	ROT77605.1	putative rho guanine nucleotide exchange factor 12 isoform X3 [Penaeus vannamei]	87.31	0	1136	#N/A	T
Mj-26350	ROT65818.1	putative anamorsin isoform X1 [Penaeus vannamei]	89.93	9e-164	471	GO:0000003,GO:0002064,GO:0002065,GO:0002066,GO:0002376,GO:0002520,GO:0003006,GO:0003674,GO:0005488,GO:0005575,GO:0005622,GO:0005623,GO:0005634,GO:0005654,GO:0005730,GO:0005737,GO:0005739,GO:0006790,GO:0007275,GO:0007276,GO:0007281,GO:0007292,GO:0008150,GO:0008152,GO:0009888,GO:0009987,GO:0010941,GO:0016043,GO:0016226,GO:0019953,GO:0022412,GO:0022414,GO:0022607,GO:0030097,GO:0030154,GO:0030707,GO:…	S
Mj-26396	ROT65598.1	hypothetical protein C7M84_016428 [Penaeus vannamei]	96.46	2e-57	191	#N/A	S
Mj-26427	ABS45569.1	QM protein [Penaeus japonicus]	99.53	5e-156	438	GO:0000027,GO:0002181,GO:0003674,GO:0003676,GO:0003723,GO:0003735,GO:0005198,GO:0005488,GO:0005575,GO:0005622,GO:0005623,GO:0005737,GO:0005829,GO:0005840,GO:0006412,GO:0006518,GO:0006807,GO:0006996,GO:0008150,GO:0008152,GO:0009058,GO:0009059,GO:0009987,GO:0010467,GO:0015934,GO:0016043,GO:0019538,GO:0022607,GO:0022613,GO:0022618,GO:0022625,GO:0022626,GO:0032991,GO:0034622,GO:0034641,GO:0034645,GO:…	J	melanization-related
Mj-2645	APU53308.1	arginine kinase [Penaeus japonicus]	100	0	724	GO:0003674,GO:0003824,GO:0004054,GO:0006793,GO:0006796,GO:0008150,GO:0008152,GO:0009987,GO:0016301,GO:0016310,GO:0016740,GO:0016772,GO:0016775,GO:0019202,GO:0044237	C
Mj-26454	ROT67240.1	Round spermatid basic protein 1 [Penaeus vannamei]	97.61	0	774	#N/A	S
Mj-26475	XP_027213861.1	LOW QUALITY PROTEIN: MOG interacting and ectopic P-granules protein 1-like [Penaeus vannamei]	90.05	2e-57	213	GO:0000118,GO:0000122,GO:0000228,GO:0000785,GO:0000790,GO:0003674,GO:0003682,GO:0005488,GO:0005515,GO:0005575,GO:0005622,GO:0005623,GO:0005634,GO:0005654,GO:0005694,GO:0005700,GO:0006355,GO:0006357,GO:0008150,GO:0009889,GO:0009890,GO:0009892,GO:0010468,GO:0010556,GO:0010558,GO:0010605,GO:0010629,GO:0016581,GO:0017053,GO:0019219,GO:0019222,GO:0031323,GO:0031324,GO:0031326,GO:0031327,GO:0031974,GO:…	A
Mj-26562	ROT72185.1	putative arginase-2, mitochondrial-like [Penaeus vannamei]	87.91	0	568	GO:0000003,GO:0000050,GO:0001101,GO:0001505,GO:0001655,GO:0001657,GO:0001666,GO:0001817,GO:0001818,GO:0001822,GO:0001823,GO:0002237,GO:0002376,GO:0002682,GO:0002683,GO:0002694,GO:0002695,GO:0002791,GO:0002792,GO:0002828,GO:0002829,GO:0002831,GO:0002832,GO:0003008,GO:0003012,GO:0003674,GO:0003824,GO:0004053,GO:0005488,GO:0005515,GO:0005575,GO:0005622,GO:0005623,GO:0005737,GO:0005739,GO:0005759,GO:…	E
Mj-26571	XP_027227381.1	protein-tyrosine sulfotransferase-like [Penaeus vannamei]	86.51	0	523	GO:0002790,GO:0003674,GO:0003824,GO:0005575,GO:0005622,GO:0005623,GO:0005737,GO:0005794,GO:0006464,GO:0006477,GO:0006478,GO:0006790,GO:0006807,GO:0006810,GO:0008104,GO:0008146,GO:0008150,GO:0008152,GO:0008476,GO:0009306,GO:0009987,GO:0012505,GO:0015031,GO:0015833,GO:0016740,GO:0016782,GO:0018193,GO:0018212,GO:0019538,GO:0032940,GO:0033036,GO:0036211,GO:0042886,GO:0043170,GO:0043226,GO:0043227,GO:…	O
Mj-26805	XP_027232636.1	60S ribosomal protein L36-like [Penaeus vannamei]	94.95	8e-62	190	GO:0002181,GO:0003674,GO:0003676,GO:0003723,GO:0003735,GO:0005198,GO:0005488,GO:0005515,GO:0005575,GO:0005622,GO:0005623,GO:0005634,GO:0005730,GO:0005737,GO:0005829,GO:0005840,GO:0006412,GO:0006518,GO:0006807,GO:0007275,GO:0007399,GO:0007417,GO:0007420,GO:0008150,GO:0008152,GO:0009058,GO:0009059,GO:0009987,GO:0010467,GO:0015934,GO:0019538,GO:0022625,GO:0022626,GO:0031974,GO:0031981,GO:0032501,GO:…	J
Mj-2681	XP_027211051.1	myophilin-like isoform X1 [Penaeus vannamei]	99.19	7e-179	510	#N/A	Z
Mj-26836	XP_027233991.1	titin-like [Penaeus vannamei]	93.69	0	1444	GO:0003674,GO:0003824,GO:0004843,GO:0006464,GO:0006508,GO:0006807,GO:0008150,GO:0008152,GO:0008233,GO:0008234,GO:0008593,GO:0009966,GO:0009967,GO:0009987,GO:0010646,GO:0010647,GO:0016579,GO:0016787,GO:0019538,GO:0019783,GO:0023051,GO:0023056,GO:0036211,GO:0036459,GO:0043170,GO:0043412,GO:0044237,GO:0044238,GO:0044260,GO:0044267,GO:0045747,GO:0048518,GO:0048522,GO:0048583,GO:0048584,GO:0050789,GO:…	O
Mj-2693	ROT79015.1	hypothetical protein C7M84_002268 [Penaeus vannamei]	99.42	3e-99	308	GO:0000491,GO:0000492,GO:0003674,GO:0003676,GO:0003723,GO:0005488,GO:0005575,GO:0005622,GO:0005623,GO:0005634,GO:0008150,GO:0009987,GO:0016043,GO:0022607,GO:0022613,GO:0022618,GO:0030515,GO:0034622,GO:0043226,GO:0043227,GO:0043229,GO:0043231,GO:0043933,GO:0044085,GO:0044424,GO:0044464,GO:0065003,GO:0071826,GO:0071840,GO:0097159,GO:1901363	S
Mj-26948	XP_027235411.1	uncharacterized protein LOC113826730 [Penaeus vannamei]	88.22	0	1148	GO:0000243,GO:0000245,GO:0000375,GO:0000377,GO:0000381,GO:0000395,GO:0000398,GO:0005575,GO:0005622,GO:0005623,GO:0005634,GO:0005681,GO:0005684,GO:0005685,GO:0006139,GO:0006376,GO:0006396,GO:0006397,GO:0006725,GO:0006807,GO:0008150,GO:0008152,GO:0008380,GO:0009987,GO:0010467,GO:0010468,GO:0016043,GO:0016070,GO:0016071,GO:0019219,GO:0019222,GO:0022607,GO:0022613,GO:0022618,GO:0030532,GO:0031323,GO:…	A
Mj-270	ROT66914.1	actin-related protein [Penaeus vannamei]	99.67	0	632	GO:0000902,GO:0003674,GO:0003779,GO:0005198,GO:0005200,GO:0005488,GO:0005515,GO:0005575,GO:0005622,GO:0005623,GO:0005856,GO:0005885,GO:0006996,GO:0007010,GO:0007015,GO:0008064,GO:0008092,GO:0008150,GO:0008360,GO:0009653,GO:0009987,GO:0010638,GO:0015629,GO:0016043,GO:0022603,GO:0022604,GO:0022607,GO:0030029,GO:0030030,GO:0030031,GO:0030036,GO:0030832,GO:0030833,GO:0030838,GO:0030865,GO:0030866,GO:…	Z	phagocytosis-related
Mj-2707	XP_027210989.1	headcase protein-like [Penaeus vannamei]	93.6	0	620	GO:0000902,GO:0000904,GO:0001763,GO:0002009,GO:0002165,GO:0005575,GO:0005622,GO:0005623,GO:0005737,GO:0007275,GO:0007399,GO:0007409,GO:0007424,GO:0007430,GO:0007431,GO:0007435,GO:0007552,GO:0008150,GO:0008219,GO:0009653,GO:0009791,GO:0009886,GO:0009887,GO:0009888,GO:0009892,GO:0009987,GO:0009996,GO:0010453,GO:0010454,GO:0010468,GO:0010605,GO:0010608,GO:0010623,GO:0010629,GO:0010721,GO:0012501,GO:…	T
Mj-27070	XP_027224069.1	lysine-specific demethylase 2A-like [Penaeus vannamei]	86.73	0	2793	GO:0000151,GO:0002164,GO:0003002,GO:0003674,GO:0003824,GO:0005575,GO:0005622,GO:0005623,GO:0005634,GO:0006325,GO:0006464,GO:0006482,GO:0006508,GO:0006511,GO:0006807,GO:0006996,GO:0007275,GO:0007379,GO:0007389,GO:0007525,GO:0007526,GO:0008150,GO:0008152,GO:0008214,GO:0009056,GO:0009057,GO:0009791,GO:0009987,GO:0010498,GO:0016043,GO:0016567,GO:0016569,GO:0016570,GO:0016574,GO:0016577,GO:0019005,GO:…	B
Mj-27074	AWM95782.1	type 1 phosphodiesterase [Penaeus vannamei]	90.59	0	1106	GO:0000003,GO:0003674,GO:0003824,GO:0004112,GO:0004114,GO:0004115,GO:0005488,GO:0005515,GO:0005516,GO:0006139,GO:0006163,GO:0006725,GO:0006753,GO:0006793,GO:0006796,GO:0006807,GO:0007610,GO:0007617,GO:0007618,GO:0008081,GO:0008150,GO:0008152,GO:0009117,GO:0009150,GO:0009187,GO:0009259,GO:0009987,GO:0016787,GO:0016788,GO:0019098,GO:0019637,GO:0019693,GO:0019953,GO:0022414,GO:0032501,GO:0032504,GO:…	T
Mj-27076	AWM95782.1	type 1 phosphodiesterase [Penaeus vannamei]	90.73	0	1110	GO:0000003,GO:0003674,GO:0003824,GO:0004112,GO:0004114,GO:0004115,GO:0005488,GO:0005515,GO:0005516,GO:0006139,GO:0006163,GO:0006725,GO:0006753,GO:0006793,GO:0006796,GO:0006807,GO:0007610,GO:0007617,GO:0007618,GO:0008081,GO:0008150,GO:0008152,GO:0009117,GO:0009150,GO:0009187,GO:0009259,GO:0009987,GO:0016787,GO:0016788,GO:0019098,GO:0019637,GO:0019693,GO:0019953,GO:0022414,GO:0032501,GO:0032504,GO:…	T
Mj-27142	XP_027235263.1	LOW QUALITY PROTEIN: protein 4.1 homolog [Penaeus vannamei]	92.56	0	1797	GO:0001700,GO:0002009,GO:0002165,GO:0003002,GO:0003007,GO:0003008,GO:0003013,GO:0003015,GO:0003674,GO:0005198,GO:0005200,GO:0005488,GO:0005515,GO:0005575,GO:0005622,GO:0005623,GO:0005856,GO:0005886,GO:0005911,GO:0005918,GO:0005920,GO:0006605,GO:0006612,GO:0006810,GO:0006886,GO:0006996,GO:0007010,GO:0007043,GO:0007155,GO:0007163,GO:0007275,GO:0007389,GO:0007391,GO:0007399,GO:0007424,GO:0007431,GO:…	S
Mj-27173	ROT66544.1	putative gamma-butyrobetaine dioxygenase-like [Penaeus vannamei]	94.74	1e-74	236	GO:0003674,GO:0003824,GO:0005488,GO:0005515,GO:0005575,GO:0005622,GO:0005623,GO:0005737,GO:0005829,GO:0006575,GO:0006577,GO:0006578,GO:0006807,GO:0008150,GO:0008152,GO:0008270,GO:0008336,GO:0009058,GO:0009437,GO:0009987,GO:0016491,GO:0016705,GO:0016706,GO:0034641,GO:0042398,GO:0042802,GO:0043167,GO:0043169,GO:0044237,GO:0044249,GO:0044271,GO:0044424,GO:0044444,GO:0044464,GO:0045329,GO:0046872,GO:…	I
Mj-27186	XP_027227991.1	RNA-binding protein squid-like isoform X1 [Penaeus vannamei]	99.54	4e-126	370	GO:0000003,GO:0000184,GO:0000226,GO:0000375,GO:0000377,GO:0000398,GO:0000578,GO:0000785,GO:0000956,GO:0001667,GO:0002009,GO:0002064,GO:0002065,GO:0002066,GO:0003002,GO:0003006,GO:0003674,GO:0003676,GO:0003723,GO:0003729,GO:0003730,GO:0005488,GO:0005575,GO:0005622,GO:0005623,GO:0005634,GO:0005654,GO:0005694,GO:0005700,GO:0005703,GO:0005737,GO:0006139,GO:0006396,GO:0006397,GO:0006401,GO:0006402,GO:…	A
Mj-27210	XP_027217050.1	uncharacterized protein C6orf132 homolog isoform X2 [Penaeus vannamei]	94.35	0	1314	#N/A	#N/A
Mj-27211	XP_027228783.1	uncharacterized protein LOC113820643 [Penaeus vannamei]	61.16	9e-67	223	#N/A	#N/A
Mj-27261	XP_027234115.1	protein PRRC2C-like isoform X3 [Penaeus vannamei]	95.41	0	2022	GO:0008150,GO:0009266,GO:0009605,GO:0009628,GO:0009649,GO:0010378,GO:0042752,GO:0050789,GO:0050896,GO:0065007	S
Mj-27289	ROT67869.1	taurine transporter [Penaeus vannamei]	93.84	0	664	#N/A	T
Mj-27291	QPG95285.1	RBM4 [Penaeus vannamei]	100	3e-153	447	GO:0000003,GO:0000375,GO:0000377,GO:0000398,GO:0003006,GO:0003674,GO:0003676,GO:0003723,GO:0003729,GO:0005488,GO:0005575,GO:0005622,GO:0005623,GO:0005634,GO:0005737,GO:0006139,GO:0006396,GO:0006397,GO:0006417,GO:0006725,GO:0006807,GO:0006810,GO:0006996,GO:0007010,GO:0007275,GO:0007276,GO:0007281,GO:0007292,GO:0007300,GO:0007303,GO:0007562,GO:0007563,GO:0007610,GO:0007622,GO:0007623,GO:0007626,GO:…	A
Mj-27305	XP_027214456.1	calcium-activated potassium channel slowpoke-like [Penaeus vannamei]	91.51	0	1156	#N/A	P
Mj-27319	XP_027206568.1	uncharacterized protein LOC113800045 [Penaeus vannamei]	98.91	8e-54	185	#N/A	#N/A
Mj-27332	XP_027211053.1	myophilin-like isoform X2 [Penaeus vannamei]	92.44	2e-145	424	#N/A	Z
Mj-27364	ABK76338.1	heat shock protein 70 [Penaeus japonicus]	99.84	0	1176	#N/A	O
Mj-27365	ABK76338.1	heat shock protein 70 [Penaeus japonicus]	99.84	0	1176	#N/A	O
Mj-274	#N/A	#N/A	#N/A	#N/A	#N/A	#N/A	#N/A
Mj-27450	ROT65153.1	hypothetical protein C7M84_016904 [Penaeus vannamei]	99.07	0	2142	GO:0003674,GO:0005096,GO:0005102,GO:0005488,GO:0005515,GO:0007154,GO:0007165,GO:0007264,GO:0007265,GO:0007266,GO:0007275,GO:0007399,GO:0007414,GO:0007415,GO:0007417,GO:0007420,GO:0008037,GO:0008038,GO:0008047,GO:0008150,GO:0008361,GO:0009987,GO:0010769,GO:0010975,GO:0016043,GO:0016319,GO:0022008,GO:0022603,GO:0022604,GO:0023052,GO:0030030,GO:0030154,GO:0030182,GO:0030215,GO:0030234,GO:0030695,GO:…	T
Mj-27585	XP_027212549.1	arginine-glutamic acid dipeptide repeats protein-like isoform X2 [Penaeus vannamei]	96.09	0	1950	GO:0000003,GO:0000118,GO:0000228,GO:0000785,GO:0000790,GO:0000902,GO:0000904,GO:0000981,GO:0001085,GO:0001708,GO:0001763,GO:0002119,GO:0002164,GO:0003006,GO:0003674,GO:0003682,GO:0003700,GO:0003712,GO:0003713,GO:0003714,GO:0005488,GO:0005515,GO:0005575,GO:0005622,GO:0005623,GO:0005634,GO:0005654,GO:0005694,GO:0006325,GO:0006338,GO:0006355,GO:0006357,GO:0006606,GO:0006607,GO:0006810,GO:0006886,GO:…	K
Mj-27595	ROT74080.1	hypothetical protein C7M84_007436 [Penaeus vannamei]	95.58	0	4413	GO:0000902,GO:0005575,GO:0005622,GO:0005623,GO:0005737,GO:0005975,GO:0005976,GO:0005977,GO:0006073,GO:0006091,GO:0006112,GO:0006629,GO:0006638,GO:0006639,GO:0006641,GO:0008150,GO:0008152,GO:0008610,GO:0009058,GO:0009653,GO:0009743,GO:0009744,GO:0009987,GO:0010033,GO:0015980,GO:0016043,GO:0019432,GO:0032502,GO:0032989,GO:0034285,GO:0042221,GO:0043170,GO:0044042,GO:0044237,GO:0044238,GO:0044249,GO:…	I
Mj-27632	XP_027236835.1	ubiquitin carboxyl-terminal hydrolase isozyme L3-like [Penaeus vannamei]	95.89	5e-143	409	GO:0001654,GO:0003674,GO:0003824,GO:0004843,GO:0005488,GO:0005515,GO:0005575,GO:0005622,GO:0005623,GO:0005634,GO:0005737,GO:0005829,GO:0006464,GO:0006508,GO:0006807,GO:0007275,GO:0007423,GO:0007610,GO:0007626,GO:0007628,GO:0007631,GO:0008150,GO:0008152,GO:0008233,GO:0008234,GO:0008344,GO:0009056,GO:0009057,GO:0009719,GO:0009725,GO:0009987,GO:0010033,GO:0010243,GO:0016579,GO:0016787,GO:0019538,GO:…	O
Mj-27633	XP_027236835.1	ubiquitin carboxyl-terminal hydrolase isozyme L3-like [Penaeus vannamei]	95.89	2e-143	411	GO:0001654,GO:0003674,GO:0003824,GO:0004843,GO:0005488,GO:0005515,GO:0005575,GO:0005622,GO:0005623,GO:0005634,GO:0005737,GO:0005829,GO:0006464,GO:0006508,GO:0006807,GO:0007275,GO:0007423,GO:0007610,GO:0007626,GO:0007628,GO:0007631,GO:0008150,GO:0008152,GO:0008233,GO:0008234,GO:0008344,GO:0009056,GO:0009057,GO:0009719,GO:0009725,GO:0009987,GO:0010033,GO:0010243,GO:0016579,GO:0016787,GO:0019538,GO:…	O
Mj-27747	XP_027234947.1	uncharacterized protein LOC113826276 [Penaeus vannamei]	79.29	0	748	#N/A	S
Mj-2784	ROT65135.1	putative myosin regulatory light chain 2 smooth muscle [Penaeus vannamei]	99.42	1e-105	319	GO:0000003,GO:0000278,GO:0000281,GO:0000902,GO:0000904,GO:0000910,GO:0001667,GO:0001700,GO:0001736,GO:0001738,GO:0001894,GO:0002009,GO:0002064,GO:0002065,GO:0002066,GO:0002165,GO:0003002,GO:0003006,GO:0003381,GO:0003382,GO:0003383,GO:0003384,GO:0003674,GO:0005488,GO:0005515,GO:0005575,GO:0005576,GO:0005622,GO:0005623,GO:0005737,GO:0005819,GO:0005856,GO:0005886,GO:0005911,GO:0005912,GO:0005938,GO:…	Z
Mj-27866	#N/A	#N/A	#N/A	#N/A	#N/A	#N/A	#N/A
Mj-27882	XP_027231058.1	pinin-like [Penaeus vannamei]	63.96	2e-51	194	#N/A	#N/A
Mj-2791	ROT81251.1	putative 70 kDa peptidyl-prolyl isomerase-like isoform X1 [Penaeus vannamei]	92.66	0	520	#N/A	O
Mj-280	#N/A	#N/A	#N/A	#N/A	#N/A	#N/A	#N/A
Mj-28016	ROT83077.1	hypothetical protein C7M84_023744 [Penaeus vannamei]	99.52	5e-154	432	GO:0000028,GO:0003674,GO:0003676,GO:0003723,GO:0003729,GO:0003735,GO:0005198,GO:0005488,GO:0005575,GO:0005622,GO:0005623,GO:0005737,GO:0005829,GO:0005840,GO:0006412,GO:0006450,GO:0006518,GO:0006807,GO:0006996,GO:0008150,GO:0008152,GO:0009058,GO:0009059,GO:0009987,GO:0010467,GO:0015935,GO:0016043,GO:0019538,GO:0019843,GO:0022607,GO:0022613,GO:0022618,GO:0022626,GO:0022627,GO:0032991,GO:0034622,GO:…	J
Mj-28105	ROT81183.1	hypothetical protein C7M84_000055 [Penaeus vannamei]	99.25	4e-90	296	#N/A	Z
Mj-28111	XP_027216934.1	microtubule-associated serine/threonine-protein kinase 3-like isoform X3 [Penaeus vannamei]	97.69	0	2298	GO:0000003,GO:0001667,GO:0002064,GO:0002065,GO:0002066,GO:0003006,GO:0003674,GO:0003824,GO:0004672,GO:0004674,GO:0005575,GO:0005622,GO:0005623,GO:0005737,GO:0006464,GO:0006468,GO:0006793,GO:0006796,GO:0006807,GO:0006810,GO:0006928,GO:0006996,GO:0007017,GO:0007018,GO:0007030,GO:0007032,GO:0007154,GO:0007165,GO:0007275,GO:0007276,GO:0007281,GO:0007292,GO:0007297,GO:0007298,GO:0007349,GO:0007444,GO:…	T
Mj-28122	XP_027232598.1	homocysteine-responsive endoplasmic reticulum-resident ubiquitin-like domain member 2 protein [Penaeus vannamei]	90.56	7e-62	218	GO:0000003,GO:0006950,GO:0006986,GO:0007154,GO:0007165,GO:0007276,GO:0007283,GO:0008150,GO:0009987,GO:0010033,GO:0019953,GO:0022414,GO:0023052,GO:0030968,GO:0032501,GO:0032504,GO:0033554,GO:0034620,GO:0034976,GO:0035966,GO:0035967,GO:0042221,GO:0044703,GO:0048232,GO:0048609,GO:0050789,GO:0050794,GO:0050896,GO:0051704,GO:0051716,GO:0065007,GO:0070887,GO:0071310	O
Mj-28123	XP_027232598.1	homocysteine-responsive endoplasmic reticulum-resident ubiquitin-like domain member 2 protein [Penaeus vannamei]	90.56	4e-62	217	GO:0000003,GO:0003674,GO:0005488,GO:0005515,GO:0005575,GO:0005622,GO:0005623,GO:0005737,GO:0005783,GO:0005789,GO:0006508,GO:0006511,GO:0006807,GO:0006810,GO:0006873,GO:0006874,GO:0006875,GO:0006886,GO:0006950,GO:0006984,GO:0006986,GO:0007154,GO:0007165,GO:0007276,GO:0007283,GO:0008104,GO:0008150,GO:0008152,GO:0009056,GO:0009057,GO:0009892,GO:0009893,GO:0009894,GO:0009896,GO:0009966,GO:0009968,GO:…	O
Mj-28125	ABW88999.1	double WAP domain-containing protein [Penaeus japonicus]	98.29	6e-66	209	#N/A	#N/A	AMPs and lysozyme-related
Mj-28126	ROT85382.1	putative RNA-binding protein cabeza-like [Penaeus vannamei]	99.2	4e-80	277	GO:0000375,GO:0000377,GO:0000398,GO:0000428,GO:0001654,GO:0003674,GO:0003676,GO:0003723,GO:0003729,GO:0005488,GO:0005575,GO:0005622,GO:0005623,GO:0005634,GO:0005654,GO:0005667,GO:0005669,GO:0006139,GO:0006351,GO:0006352,GO:0006366,GO:0006367,GO:0006396,GO:0006397,GO:0006725,GO:0006807,GO:0007275,GO:0007399,GO:0007416,GO:0007423,GO:0007528,GO:0007610,GO:0007626,GO:0008150,GO:0008152,GO:0008344,GO:…	A
Mj-28131	ROT70331.1	hypothetical protein C7M84_011381 [Penaeus vannamei]	36.54	5e-15	74.3	#N/A	#N/A
Mj-28132	ROT70331.1	hypothetical protein C7M84_011381 [Penaeus vannamei]	35.1	2e-12	66.6	#N/A	#N/A
Mj-28152	AGZ89665.1	eukaryotic initiation factor 4A [Penaeus vannamei]	98.32	0	777	GO:0000003,GO:0000381,GO:0002164,GO:0002165,GO:0002168,GO:0003006,GO:0003674,GO:0003676,GO:0003723,GO:0003724,GO:0003743,GO:0003824,GO:0004004,GO:0004386,GO:0005488,GO:0005575,GO:0005622,GO:0005623,GO:0005634,GO:0005730,GO:0005737,GO:0005829,GO:0006139,GO:0006412,GO:0006413,GO:0006518,GO:0006725,GO:0006807,GO:0007275,GO:0007276,GO:0007277,GO:0007279,GO:0007281,GO:0007292,GO:0007349,GO:0007444,GO:…	A
Mj-28165	ROT77259.1	hypothetical protein C7M84_004116 [Penaeus vannamei]	83.78	2e-61	196	#N/A	#N/A
Mj-28166	ROT77259.1	hypothetical protein C7M84_004116 [Penaeus vannamei]	84.68	6e-62	197	#N/A	#N/A
Mj-28176	XP_027213260.1	uncharacterized protein LOC113806335 [Penaeus vannamei]	87.14	2e-82	257	#N/A	#N/A
Mj-28194	AFU93449.1	ribosomal protein L7 [Penaeus vannamei]	92.47	2e-149	436	GO:0000463,GO:0000470,GO:0002165,GO:0002181,GO:0003674,GO:0003676,GO:0003723,GO:0003735,GO:0005198,GO:0005488,GO:0005575,GO:0005622,GO:0005623,GO:0005737,GO:0005829,GO:0005840,GO:0006139,GO:0006364,GO:0006396,GO:0006412,GO:0006518,GO:0006725,GO:0006807,GO:0007275,GO:0008150,GO:0008152,GO:0009058,GO:0009059,GO:0009791,GO:0009987,GO:0010467,GO:0015934,GO:0016070,GO:0016072,GO:0019538,GO:0022613,GO:…	J
Mj-28198	XP_027232720.1	LOW QUALITY PROTEIN: hemocytin-like [Penaeus vannamei]	88.64	0	7431	GO:0002376,GO:0003674,GO:0005488,GO:0005515,GO:0005575,GO:0005576,GO:0006950,GO:0006952,GO:0006955,GO:0006959,GO:0007599,GO:0008150,GO:0009611,GO:0032501,GO:0042060,GO:0042381,GO:0042802,GO:0042803,GO:0045087,GO:0046983,GO:0050817,GO:0050878,GO:0050896,GO:0065007,GO:0065008	VW	clotting-related
Mj-28199	XP_027232720.1	LOW QUALITY PROTEIN: hemocytin-like [Penaeus vannamei]	91.6	0	2872	GO:0002376,GO:0003674,GO:0005488,GO:0005515,GO:0005575,GO:0005576,GO:0006950,GO:0006952,GO:0006955,GO:0006959,GO:0007599,GO:0008150,GO:0009611,GO:0032501,GO:0042060,GO:0042381,GO:0042802,GO:0042803,GO:0045087,GO:0046983,GO:0050817,GO:0050878,GO:0050896,GO:0065007,GO:0065008	T	clotting-related
Mj-28225	AFT92034.1	triose-phosphate isomerase [Penaeus vannamei]	98.39	0	514	GO:0000768,GO:0003008,GO:0003674,GO:0003824,GO:0004807,GO:0005488,GO:0005515,GO:0005575,GO:0005622,GO:0005623,GO:0005634,GO:0005737,GO:0005829,GO:0005975,GO:0005996,GO:0006006,GO:0006007,GO:0006066,GO:0006071,GO:0006081,GO:0006082,GO:0006090,GO:0006091,GO:0006094,GO:0006096,GO:0006139,GO:0006163,GO:0006164,GO:0006165,GO:0006725,GO:0006732,GO:0006733,GO:0006734,GO:0006735,GO:0006753,GO:0006754,GO:…	G
Mj-28241	ROT61238.1	hypothetical protein C7M84_021013 [Penaeus vannamei]	97.86	2e-171	491	#N/A	#N/A
Mj-28259	XP_027222071.1	uncharacterized protein LOC113814237 [Penaeus vannamei]	72.73	3e-52	174	#N/A	#N/A
Mj-28260	XP_027216241.1	uncharacterized protein LOC113808957 [Penaeus vannamei]	75.89	2e-105	322	GO:0002376,GO:0003674,GO:0005488,GO:0005515,GO:0005575,GO:0005576,GO:0006950,GO:0006952,GO:0006955,GO:0006959,GO:0007599,GO:0008150,GO:0009611,GO:0032501,GO:0042060,GO:0042381,GO:0042802,GO:0042803,GO:0045087,GO:0046983,GO:0050817,GO:0050878,GO:0050896,GO:0065007,GO:0065008	VW
Mj-283	XP_027214664.1	cyclin-T2-like isoform X3 [Penaeus vannamei]	94.41	0	1410	GO:0000079,GO:0000307,GO:0001932,GO:0001934,GO:0003674,GO:0005575,GO:0005622,GO:0005623,GO:0005634,GO:0005654,GO:0005694,GO:0005700,GO:0005703,GO:0006139,GO:0006351,GO:0006355,GO:0006357,GO:0006725,GO:0006807,GO:0006950,GO:0008023,GO:0008024,GO:0008150,GO:0008152,GO:0009058,GO:0009059,GO:0009266,GO:0009408,GO:0009628,GO:0009889,GO:0009891,GO:0009893,GO:0009987,GO:0010467,GO:0010468,GO:0010556,GO:…	D
Mj-28354	ROT76563.1	Reticulon-1 [Penaeus vannamei]	98.71	7e-102	316	GO:0005575,GO:0005622,GO:0005623,GO:0005737,GO:0005783,GO:0005790,GO:0006996,GO:0007029,GO:0008150,GO:0009987,GO:0010256,GO:0012505,GO:0016043,GO:0030424,GO:0030426,GO:0030427,GO:0033267,GO:0042995,GO:0043005,GO:0043226,GO:0043227,GO:0043229,GO:0043231,GO:0044295,GO:0044424,GO:0044444,GO:0044463,GO:0044464,GO:0045169,GO:0061024,GO:0071786,GO:0071840,GO:0090158,GO:0097458,GO:0120025,GO:0120038,GO:…	U
Mj-28368	XP_027209101.1	ARF GTPase-activating protein GIT2-like [Penaeus vannamei]	96.73	0	1114	GO:0003674,GO:0005096,GO:0005198,GO:0005488,GO:0005515,GO:0005575,GO:0005622,GO:0005623,GO:0005737,GO:0006810,GO:0007275,GO:0007399,GO:0007417,GO:0007420,GO:0007525,GO:0008047,GO:0008104,GO:0008150,GO:0009966,GO:0009967,GO:0010646,GO:0010647,GO:0016319,GO:0023051,GO:0023056,GO:0030234,GO:0030695,GO:0031252,GO:0032501,GO:0032502,GO:0032947,GO:0033036,GO:0035330,GO:0035332,GO:0035418,GO:0036465,GO:…	T
Mj-28404	XP_027229059.1	protein RRP5 homolog [Penaeus vannamei]	75.58	0	1573	GO:0000460,GO:0000462,GO:0000466,GO:0003674,GO:0003676,GO:0003723,GO:0005488,GO:0005515,GO:0005575,GO:0005622,GO:0005623,GO:0005634,GO:0005654,GO:0005730,GO:0005737,GO:0005829,GO:0006139,GO:0006364,GO:0006396,GO:0006725,GO:0006807,GO:0008134,GO:0008150,GO:0008152,GO:0009987,GO:0010467,GO:0016070,GO:0016072,GO:0022613,GO:0030490,GO:0030684,GO:0031974,GO:0031981,GO:0032040,GO:0032991,GO:0034470,GO:…	A
Mj-28413	XP_027227411.1	LOW QUALITY PROTEIN: uncharacterized protein LOC113819372 [Penaeus vannamei]	90.26	0	4515	GO:0000003,GO:0000785,GO:0001700,GO:0003006,GO:0003674,GO:0003682,GO:0003824,GO:0005488,GO:0005515,GO:0005575,GO:0005622,GO:0005623,GO:0005634,GO:0005654,GO:0005694,GO:0005700,GO:0006325,GO:0006338,GO:0006355,GO:0006464,GO:0006479,GO:0006807,GO:0006996,GO:0007275,GO:0007276,GO:0007281,GO:0007292,GO:0007610,GO:0008150,GO:0008152,GO:0008168,GO:0008170,GO:0008213,GO:0008276,GO:0008757,GO:0009790,GO:…	K
Mj-28641	XP_027207957.1	U2 snRNP-associated SURP motif-containing protein-like [Penaeus vannamei]	96.84	0	902	GO:0003674,GO:0003676,GO:0003723,GO:0003729,GO:0005488,GO:0005575,GO:0005622,GO:0005623,GO:0005634,GO:0005654,GO:0031974,GO:0031981,GO:0043226,GO:0043227,GO:0043229,GO:0043231,GO:0043233,GO:0044422,GO:0044424,GO:0044428,GO:0044446,GO:0044464,GO:0070013,GO:0097159,GO:1901363	A
Mj-2871	XP_027230889.1	anoctamin-7-like isoform X5 [Penaeus vannamei]	77.66	3e-77	265	#N/A	S
Mj-28725	XP_027224242.1	uncharacterized protein LOC113816377 [Penaeus vannamei]	56.54	3e-85	288	GO:0000902,GO:0000904,GO:0003008,GO:0005575,GO:0005576,GO:0005623,GO:0005886,GO:0005887,GO:0006928,GO:0006935,GO:0007275,GO:0007399,GO:0007409,GO:0007411,GO:0007528,GO:0007529,GO:0007600,GO:0007606,GO:0008150,GO:0009605,GO:0009653,GO:0009987,GO:0016020,GO:0016021,GO:0016043,GO:0022008,GO:0030030,GO:0030154,GO:0030182,GO:0031175,GO:0031224,GO:0031226,GO:0031252,GO:0031253,GO:0031256,GO:0032501,GO:…	T
Mj-28767	AMO44058.1	stylicin protein [Penaeus japonicus]	99.02	3e-45	154	#N/A	#N/A	AMPs and lysozyme-related
Mj-2882	AFV99179.1	autophagy-related protein 8 [Penaeus vannamei]	100	1e-79	249	GO:0000045,GO:0000226,GO:0000323,GO:0000421,GO:0000422,GO:0002119,GO:0002164,GO:0002165,GO:0003674,GO:0005102,GO:0005488,GO:0005515,GO:0005575,GO:0005622,GO:0005623,GO:0005737,GO:0005739,GO:0005740,GO:0005741,GO:0005764,GO:0005767,GO:0005773,GO:0005774,GO:0005776,GO:0005783,GO:0005790,GO:0005794,GO:0005829,GO:0005856,GO:0005875,GO:0005886,GO:0005929,GO:0005930,GO:0006605,GO:0006810,GO:0006886,GO:…	Z
Mj-28858	#N/A	#N/A	#N/A	#N/A	#N/A	#N/A	#N/A
Mj-28888	XP_037780852.1	uncharacterized protein LOC119577191 [Penaeus monodon]	39.25	1e-64	214	#N/A	#N/A
Mj-28902	ROT84913.1	putative phosphatase and actin regulator 4 isoform X4 [Penaeus vannamei]	97.76	0	652	GO:0003674,GO:0003779,GO:0005488,GO:0005515,GO:0005575,GO:0005622,GO:0005623,GO:0005634,GO:0005737,GO:0005829,GO:0006996,GO:0007010,GO:0008092,GO:0008150,GO:0009987,GO:0016043,GO:0030029,GO:0030036,GO:0031532,GO:0043226,GO:0043227,GO:0043229,GO:0043231,GO:0044424,GO:0044444,GO:0044464,GO:0071840	S
Mj-28920	XP_027217430.1	SH3 and F-BAR domain-containing protein DDB_G0274695-like [Penaeus vannamei]	79.66	0	533	GO:0001725,GO:0003674,GO:0003779,GO:0005488,GO:0005515,GO:0005575,GO:0005622,GO:0005623,GO:0005737,GO:0005826,GO:0005829,GO:0005856,GO:0005886,GO:0005938,GO:0007154,GO:0007155,GO:0007165,GO:0008092,GO:0008150,GO:0009987,GO:0015629,GO:0016020,GO:0019899,GO:0019902,GO:0019903,GO:0022610,GO:0023052,GO:0030863,GO:0030864,GO:0032153,GO:0032154,GO:0032155,GO:0032432,GO:0042641,GO:0042802,GO:0043226,GO:…	T
Mj-28951	XP_027233025.1	platelet-derived growth factor receptor alpha-like [Penaeus vannamei]	49.81	0	654	GO:0000003,GO:0001655,GO:0001667,GO:0001932,GO:0001934,GO:0002009,GO:0002064,GO:0002065,GO:0002066,GO:0002164,GO:0002165,GO:0002376,GO:0002520,GO:0002682,GO:0003006,GO:0003674,GO:0003824,GO:0004672,GO:0004713,GO:0004714,GO:0004888,GO:0005021,GO:0005488,GO:0005515,GO:0005575,GO:0005623,GO:0005886,GO:0006464,GO:0006468,GO:0006793,GO:0006796,GO:0006807,GO:0006928,GO:0006950,GO:0006952,GO:0006955,GO:…	T	cell growth-related
Mj-28952	XP_027233025.1	platelet-derived growth factor receptor alpha-like [Penaeus vannamei]	49.81	0	654	GO:0000003,GO:0001655,GO:0001667,GO:0001932,GO:0001934,GO:0002009,GO:0002064,GO:0002065,GO:0002066,GO:0002164,GO:0002165,GO:0002376,GO:0002520,GO:0002682,GO:0003006,GO:0003674,GO:0003824,GO:0004672,GO:0004713,GO:0004714,GO:0004888,GO:0005021,GO:0005488,GO:0005515,GO:0005575,GO:0005623,GO:0005886,GO:0006464,GO:0006468,GO:0006793,GO:0006796,GO:0006807,GO:0006928,GO:0006950,GO:0006952,GO:0006955,GO:…	T	cell growth-related
Mj-28954	XP_027233025.1	platelet-derived growth factor receptor alpha-like [Penaeus vannamei]	49.81	0	654	GO:0000003,GO:0001655,GO:0001667,GO:0001932,GO:0001934,GO:0002009,GO:0002064,GO:0002065,GO:0002066,GO:0002164,GO:0002165,GO:0002376,GO:0002520,GO:0002682,GO:0003006,GO:0003674,GO:0003824,GO:0004672,GO:0004713,GO:0004714,GO:0004888,GO:0005021,GO:0005488,GO:0005515,GO:0005575,GO:0005623,GO:0005886,GO:0006464,GO:0006468,GO:0006793,GO:0006796,GO:0006807,GO:0006928,GO:0006950,GO:0006952,GO:0006955,GO:…	T	cell growth-related
Mj-28958	ROT77258.1	hypothetical protein C7M84_004115 [Penaeus vannamei]	83.76	8e-55	176	#N/A	#N/A
Mj-28976	AXY96617.1	mitochondrial uncoupling protein 5 [Penaeus vannamei]	99.03	2e-144	432	GO:0003008,GO:0003674,GO:0005215,GO:0005575,GO:0005622,GO:0005623,GO:0005737,GO:0005739,GO:0005740,GO:0005743,GO:0006810,GO:0006839,GO:0007600,GO:0007605,GO:0008150,GO:0016020,GO:0016021,GO:0019222,GO:0019866,GO:0022857,GO:0031090,GO:0031224,GO:0031966,GO:0031967,GO:0031975,GO:0032501,GO:0043226,GO:0043227,GO:0043229,GO:0043231,GO:0044422,GO:0044424,GO:0044425,GO:0044429,GO:0044444,GO:0044446,GO:…	C
Mj-28981	#N/A	#N/A	#N/A	#N/A	#N/A	#N/A	#N/A
Mj-28984	XP_027228479.1	serine/threonine-protein phosphatase 2A 65 kDa regulatory subunit A alpha isoform-like isoform X1 [Penaeus vannamei]	99.49	0	1214	GO:0000003,GO:0000070,GO:0000086,GO:0000159,GO:0000184,GO:0000188,GO:0000212,GO:0000226,GO:0000278,GO:0000280,GO:0000775,GO:0000819,GO:0000956,GO:0001558,GO:0001932,GO:0001933,GO:0003674,GO:0003823,GO:0003824,GO:0004721,GO:0004722,GO:0005488,GO:0005515,GO:0005575,GO:0005622,GO:0005623,GO:0005634,GO:0005635,GO:0005694,GO:0005737,GO:0005739,GO:0005813,GO:0005814,GO:0005815,GO:0005819,GO:0005829,GO:…	T
Mj-28995	ROT66986.1	putative methionine aminopeptidase 2-like, partial [Penaeus vannamei]	95.03	0	652	#N/A	O
Mj-29020	XP_027231684.1	MICAL-like protein 1 [Penaeus vannamei]	86.83	0	1498	GO:0003674,GO:0003779,GO:0005488,GO:0005515,GO:0008092	Z
Mj-29021	XP_027231684.1	MICAL-like protein 1 [Penaeus vannamei]	90.8	0	1617	GO:0003674,GO:0003779,GO:0005488,GO:0005515,GO:0008092	Z
Mj-29030	XP_027229026.1	cleavage and polyadenylation specificity factor subunit 6-like [Penaeus vannamei]	100	4e-53	198	#N/A	#N/A
Mj-29063	ROT61616.1	ribosomal protein rpl6 [Penaeus vannamei]	95.83	3e-146	431	GO:0003674,GO:0005488,GO:0005515,GO:0007275,GO:0007568,GO:0008150,GO:0008340,GO:0010259,GO:0032501,GO:0032502,GO:0048856	J
Mj-29099	XP_027214069.1	src substrate cortactin-like isoform X4 [Penaeus vannamei]	80.36	0	692	GO:0000902,GO:0001558,GO:0001726,GO:0002102,GO:0003674,GO:0005488,GO:0005515,GO:0005522,GO:0005575,GO:0005622,GO:0005623,GO:0005737,GO:0005794,GO:0005819,GO:0005829,GO:0005856,GO:0005886,GO:0005905,GO:0005938,GO:0006810,GO:0006886,GO:0006897,GO:0006898,GO:0006928,GO:0006929,GO:0006930,GO:0006937,GO:0006940,GO:0006996,GO:0007010,GO:0007044,GO:0007045,GO:0007155,GO:0007160,GO:0007275,GO:0007399,GO:…	T
Mj-29105	XP_027223599.1	tubulin-folding cofactor B-like isoform X1 [Penaeus vannamei]	90.84	2e-151	445	GO:0000003,GO:0000226,GO:0003006,GO:0005575,GO:0005622,GO:0005623,GO:0005634,GO:0005737,GO:0005813,GO:0005815,GO:0005819,GO:0005829,GO:0005856,GO:0005938,GO:0006996,GO:0007010,GO:0007017,GO:0007163,GO:0007275,GO:0007276,GO:0007281,GO:0007292,GO:0007308,GO:0007309,GO:0007389,GO:0008150,GO:0009798,GO:0009987,GO:0009994,GO:0015630,GO:0016043,GO:0019953,GO:0021700,GO:0022412,GO:0022414,GO:0030010,GO:…	O
Mj-29114	XP_027232069.1	eukaryotic translation initiation factor 3 subunit A-like, partial [Penaeus vannamei]	94.88	0	1638	GO:0001732,GO:0002181,GO:0002183,GO:0002188,GO:0003674,GO:0003676,GO:0003723,GO:0003729,GO:0003743,GO:0005488,GO:0005575,GO:0005622,GO:0005623,GO:0005737,GO:0005829,GO:0005852,GO:0006412,GO:0006413,GO:0006417,GO:0006446,GO:0006518,GO:0006807,GO:0008135,GO:0008150,GO:0008152,GO:0009058,GO:0009059,GO:0009889,GO:0009987,GO:0010467,GO:0010468,GO:0010556,GO:0010608,GO:0016043,GO:0019222,GO:0019538,GO:…	J
Mj-2917	AFU93449.1	ribosomal protein L7 [Penaeus vannamei]	92.47	3e-150	436	GO:0000463,GO:0000470,GO:0002165,GO:0002181,GO:0003674,GO:0003676,GO:0003723,GO:0003735,GO:0005198,GO:0005488,GO:0005575,GO:0005622,GO:0005623,GO:0005737,GO:0005829,GO:0005840,GO:0006139,GO:0006364,GO:0006396,GO:0006412,GO:0006518,GO:0006725,GO:0006807,GO:0007275,GO:0008150,GO:0008152,GO:0009058,GO:0009059,GO:0009791,GO:0009987,GO:0010467,GO:0015934,GO:0016070,GO:0016072,GO:0019538,GO:0022613,GO:…	J
Mj-29217	XP_027208304.1	exostosin-1b-like [Penaeus vannamei]	98.14	0	821	#N/A	GMW
Mj-29295	ROT70833.1	hypothetical protein C7M84_010852 [Penaeus vannamei]	99.04	0	650	GO:0003674,GO:0003824,GO:0004842,GO:0005575,GO:0005622,GO:0005623,GO:0005737,GO:0005829,GO:0006464,GO:0006508,GO:0006511,GO:0006807,GO:0008150,GO:0008152,GO:0009056,GO:0009057,GO:0009987,GO:0010941,GO:0016567,GO:0016740,GO:0019538,GO:0019787,GO:0019941,GO:0030163,GO:0032446,GO:0036211,GO:0042981,GO:0043066,GO:0043067,GO:0043069,GO:0043170,GO:0043412,GO:0043632,GO:0044237,GO:0044238,GO:0044248,GO:…	O
Mj-29318	XP_027222898.1	serine/arginine repetitive matrix protein 2-like isoform X4 [Penaeus vannamei]	66.17	0	1325	#N/A	#N/A
Mj-29325	ROT71712.1	putative serine/threonine-protein kinase Nek4-like [Penaeus vannamei]	73.98	0	1288	GO:0000278,GO:0001932,GO:0001934,GO:0003674,GO:0003824,GO:0004672,GO:0004674,GO:0005488,GO:0005575,GO:0005622,GO:0005623,GO:0005737,GO:0005815,GO:0005829,GO:0005856,GO:0005929,GO:0006355,GO:0006464,GO:0006468,GO:0006793,GO:0006796,GO:0006807,GO:0006950,GO:0006974,GO:0007049,GO:0007154,GO:0007165,GO:0007346,GO:0008150,GO:0008152,GO:0009889,GO:0009891,GO:0009893,GO:0009987,GO:0010468,GO:0010556,GO:…	T
Mj-29344	XP_027214431.1	NAD-dependent protein deacetylase sirtuin-2-like isoform X3 [Penaeus vannamei]	96.2	0	678	GO:0003674,GO:0003824,GO:0004407,GO:0005575,GO:0005622,GO:0005623,GO:0005634,GO:0005737,GO:0006325,GO:0006464,GO:0006476,GO:0006807,GO:0006996,GO:0007275,GO:0007568,GO:0008150,GO:0008152,GO:0008340,GO:0009987,GO:0010259,GO:0016043,GO:0016569,GO:0016570,GO:0016575,GO:0016787,GO:0016810,GO:0016811,GO:0017136,GO:0019213,GO:0019538,GO:0032501,GO:0032502,GO:0033558,GO:0034979,GO:0035601,GO:0036211,GO:…	BK
Mj-294	XP_027211505.1	GAS2-like protein 1 [Penaeus vannamei]	96.36	0	1094	GO:0000003,GO:0000902,GO:0000904,GO:0002064,GO:0002065,GO:0002066,GO:0003006,GO:0007276,GO:0007281,GO:0007292,GO:0008150,GO:0008593,GO:0009653,GO:0009888,GO:0009966,GO:0009968,GO:0009987,GO:0010646,GO:0010648,GO:0016043,GO:0019953,GO:0022412,GO:0022414,GO:0023051,GO:0023057,GO:0030154,GO:0030707,GO:0030713,GO:0030855,GO:0032501,GO:0032502,GO:0032504,GO:0032989,GO:0044703,GO:0045746,GO:0048468,GO:…	Z
Mj-2940	ROT85466.1	calponin/transgelin [Penaeus vannamei]	97.85	5e-130	380	GO:0000976,GO:0000977,GO:0000978,GO:0000987,GO:0001012,GO:0001067,GO:0003008,GO:0003012,GO:0003674,GO:0003676,GO:0003677,GO:0003690,GO:0003779,GO:0005488,GO:0005515,GO:0005575,GO:0005622,GO:0005623,GO:0005737,GO:0005856,GO:0005865,GO:0006936,GO:0006939,GO:0007154,GO:0007165,GO:0008092,GO:0008150,GO:0009719,GO:0009725,GO:0009755,GO:0009987,GO:0010033,GO:0015629,GO:0023052,GO:0030016,GO:0030017,GO:…	Z
Mj-2946	XP_027226765.1	serine/arginine-rich splicing factor 3-like [Penaeus vannamei]	100	1e-45	160	GO:0000375,GO:0000377,GO:0000381,GO:0000398,GO:0001178,GO:0003674,GO:0003676,GO:0003723,GO:0003729,GO:0005488,GO:0006139,GO:0006355,GO:0006357,GO:0006396,GO:0006397,GO:0006725,GO:0006807,GO:0008150,GO:0008152,GO:0008380,GO:0009889,GO:0009987,GO:0010467,GO:0010468,GO:0010556,GO:0016070,GO:0016071,GO:0019219,GO:0019222,GO:0031323,GO:0031326,GO:0031440,GO:0034641,GO:0043170,GO:0043254,GO:0043484,GO:…	A
Mj-2947	XP_027237147.1	glyceraldehyde-3-phosphate dehydrogenase isoform X2 [Penaeus vannamei]	97.12	0	703	#N/A	G
Mj-29547	ROT69407.1	heterochromatin-associated protein HP1, partial [Penaeus vannamei]	48.98	1e-08	54.3	#N/A	B
Mj-2957	BAB85575.1	cyclic AMP-regulated protein like protein, partial [Penaeus japonicus]	97.39	3e-100	303	#N/A	Z
Mj-29589	#N/A	#N/A	#N/A	#N/A	#N/A	#N/A	#N/A
Mj-29690	XP_027232699.1	titin-like [Penaeus vannamei]	68.05	0	3356	#N/A	#N/A
Mj-29701	ROT66591.1	putative poly(U)-specific endoribonuclease-like [Penaeus vannamei]	81.41	2e-159	467	GO:0003674,GO:0003676,GO:0003723,GO:0003824,GO:0004518,GO:0004519,GO:0004521,GO:0004540,GO:0005488,GO:0006139,GO:0006725,GO:0006807,GO:0008150,GO:0008152,GO:0009987,GO:0016070,GO:0016787,GO:0016788,GO:0034641,GO:0043170,GO:0044237,GO:0044238,GO:0046483,GO:0071704,GO:0090304,GO:0090305,GO:0090501,GO:0090502,GO:0097159,GO:0140098,GO:1901360,GO:1901363	G
Mj-2972	BAJ34645.1	astakine [Penaeus japonicus]	100	8e-80	249	#N/A	#N/A	cell growth-related
Mj-29721	ROT69848.1	variable lymphocyte receptor A [Penaeus vannamei]	50.1	1e-152	461	#N/A	#N/A
Mj-29726	ROT68747.1	putative 40S ribosomal protein S17-like [Penaeus vannamei]	100	4e-91	266	#N/A	J
Mj-29755	ROT78778.1	hypothetical protein C7M84_002516 [Penaeus vannamei]	47.76	1e-11	63.2	#N/A	#N/A
Mj-29771	QHN63924.1	mitochondrial ATPase inhibitor factor 1 [Penaeus japonicus]	100	2e-33	119	#N/A	#N/A
Mj-29779	ROT84482.1	Splicing factor, arginine/serine-rich 16 [Penaeus vannamei]	98.37	7e-171	507	#N/A	A
Mj-2978	#N/A	#N/A	#N/A	#N/A	#N/A	#N/A	#N/A
Mj-298	#N/A	#N/A	#N/A	#N/A	#N/A	#N/A	#N/A
Mj-29866	#N/A	#N/A	#N/A	#N/A	#N/A	#N/A	#N/A
Mj-29929	XP_027230456.1	LOW QUALITY PROTEIN: bestrophin-3-like [Penaeus vannamei]	96.58	0	648	#N/A	P
Mj-2995	ROT80870.1	putative phenylalanine--tRNA ligase, mitochondrial [Penaeus vannamei]	91.78	0	860	GO:0000049,GO:0003674,GO:0003676,GO:0003723,GO:0003824,GO:0004812,GO:0004826,GO:0005488,GO:0005575,GO:0005622,GO:0005623,GO:0005737,GO:0005739,GO:0006082,GO:0006139,GO:0006396,GO:0006399,GO:0006412,GO:0006418,GO:0006432,GO:0006518,GO:0006520,GO:0006725,GO:0006807,GO:0008033,GO:0008150,GO:0008152,GO:0009058,GO:0009059,GO:0009987,GO:0010467,GO:0016070,GO:0016874,GO:0016875,GO:0019538,GO:0019752,GO:…	J
Mj-30	XP_027209985.1	titin-like [Penaeus vannamei]	53.87	0	1259	GO:0003674,GO:0005096,GO:0005488,GO:0005515,GO:0005575,GO:0005622,GO:0005623,GO:0006810,GO:0006886,GO:0008047,GO:0008104,GO:0008150,GO:0012505,GO:0015031,GO:0015833,GO:0017016,GO:0017137,GO:0019899,GO:0030234,GO:0030695,GO:0031267,GO:0031338,GO:0032879,GO:0033036,GO:0033043,GO:0034613,GO:0042886,GO:0043085,GO:0043087,GO:0043547,GO:0044093,GO:0044464,GO:0045184,GO:0046907,GO:0050789,GO:0050790,GO:…	U
Mj-30149	ROT85589.1	saposin isoform 1 [Penaeus vannamei]	90.03	0	1625	GO:0000323,GO:0001664,GO:0003674,GO:0005102,GO:0005488,GO:0005515,GO:0005575,GO:0005622,GO:0005623,GO:0005737,GO:0005764,GO:0005768,GO:0005770,GO:0005773,GO:0005776,GO:0006403,GO:0006629,GO:0006643,GO:0006665,GO:0006807,GO:0006810,GO:0008047,GO:0008150,GO:0008152,GO:0009987,GO:0012505,GO:0015931,GO:0030234,GO:0031410,GO:0031982,GO:0033036,GO:0033227,GO:0042592,GO:0043085,GO:0043226,GO:0043227,GO:…	GI
Mj-30150	XP_027216805.1	ras-related protein Rap-1b-like isoform X2 [Penaeus vannamei]	99.43	9e-121	353	GO:0000003,GO:0000902,GO:0000904,GO:0001654,GO:0001700,GO:0001736,GO:0001738,GO:0001745,GO:0002009,GO:0002064,GO:0002065,GO:0002066,GO:0002376,GO:0002520,GO:0003006,GO:0003674,GO:0003824,GO:0003924,GO:0005488,GO:0005515,GO:0005575,GO:0005623,GO:0006928,GO:0006929,GO:0006930,GO:0007154,GO:0007163,GO:0007164,GO:0007165,GO:0007264,GO:0007265,GO:0007275,GO:0007276,GO:0007281,GO:0007292,GO:0007391,GO:…	S
Mj-30158	BBC20717.1	integrin alpha ps [Penaeus japonicus]	100	0	2136	GO:0000003,GO:0000902,GO:0000904,GO:0001555,GO:0001700,GO:0002009,GO:0002011,GO:0002164,GO:0003006,GO:0003008,GO:0003344,GO:0003674,GO:0005488,GO:0005515,GO:0005575,GO:0005622,GO:0005623,GO:0005737,GO:0005886,GO:0005887,GO:0005912,GO:0005924,GO:0005925,GO:0006810,GO:0006897,GO:0006909,GO:0006928,GO:0006935,GO:0006950,GO:0007155,GO:0007157,GO:0007160,GO:0007275,GO:0007276,GO:0007281,GO:0007292,GO:…	W	phagocytosis-related
Mj-30171	XP_027237304.1	60S ribosomal protein L44-like isoform X1 [Penaeus vannamei]	75.96	8e-36	125	GO:0002181,GO:0003674,GO:0003735,GO:0005198,GO:0005575,GO:0005622,GO:0005623,GO:0005737,GO:0005829,GO:0005840,GO:0006412,GO:0006518,GO:0006807,GO:0008150,GO:0008152,GO:0009058,GO:0009059,GO:0009987,GO:0010467,GO:0015934,GO:0019538,GO:0022625,GO:0022626,GO:0032991,GO:0034641,GO:0034645,GO:0043043,GO:0043170,GO:0043226,GO:0043228,GO:0043229,GO:0043232,GO:0043603,GO:0043604,GO:0044237,GO:0044238,GO:…	J
Mj-30176	XP_027211505.1	GAS2-like protein 1 [Penaeus vannamei]	96.36	0	1094	GO:0000003,GO:0000902,GO:0000904,GO:0002064,GO:0002065,GO:0002066,GO:0003006,GO:0007276,GO:0007281,GO:0007292,GO:0008150,GO:0008593,GO:0009653,GO:0009888,GO:0009966,GO:0009968,GO:0009987,GO:0010646,GO:0010648,GO:0016043,GO:0019953,GO:0022412,GO:0022414,GO:0023051,GO:0023057,GO:0030154,GO:0030707,GO:0030713,GO:0030855,GO:0032501,GO:0032502,GO:0032504,GO:0032989,GO:0044703,GO:0045746,GO:0048468,GO:…	Z
Mj-30202	XP_027228992.1	heterogeneous nuclear ribonucleoprotein L-like isoform X9 [Penaeus vannamei]	97.33	0	748	GO:0000902,GO:0000904,GO:0003674,GO:0003676,GO:0003723,GO:0003729,GO:0005488,GO:0006928,GO:0006935,GO:0007275,GO:0007399,GO:0007409,GO:0007411,GO:0007568,GO:0007610,GO:0007631,GO:0008150,GO:0008340,GO:0008343,GO:0009605,GO:0009653,GO:0009987,GO:0010259,GO:0016043,GO:0022008,GO:0030030,GO:0030154,GO:0030182,GO:0030534,GO:0031175,GO:0032501,GO:0032502,GO:0032989,GO:0032990,GO:0040011,GO:0042221,GO:…	A
Mj-30255	XP_027232453.1	aromatic-L-amino-acid decarboxylase-like [Penaeus vannamei]	95.58	0	1213	GO:0000003,GO:0003674,GO:0003824,GO:0004837,GO:0007610,GO:0007622,GO:0007623,GO:0007626,GO:0008150,GO:0009410,GO:0010033,GO:0010243,GO:0014070,GO:0016829,GO:0016830,GO:0016831,GO:0018991,GO:0019098,GO:0022414,GO:0030534,GO:0032501,GO:0032504,GO:0042220,GO:0042221,GO:0042493,GO:0043279,GO:0045475,GO:0048148,GO:0048511,GO:0048512,GO:0048609,GO:0050896,GO:0060359,GO:0072347,GO:1901698,GO:1901700	E
Mj-30260	XP_027225036.1	cAMP-responsive element-binding protein-like 2 [Penaeus vannamei]	97.09	2e-63	202	GO:0003674,GO:0003682,GO:0005488,GO:0005515,GO:0005575,GO:0005622,GO:0005623,GO:0005634,GO:0006355,GO:0006950,GO:0007154,GO:0007165,GO:0008150,GO:0009605,GO:0009889,GO:0009891,GO:0009893,GO:0009987,GO:0009991,GO:0010468,GO:0010556,GO:0010557,GO:0010604,GO:0010628,GO:0019219,GO:0019222,GO:0023052,GO:0031323,GO:0031325,GO:0031326,GO:0031328,GO:0031667,GO:0031929,GO:0035556,GO:0038202,GO:0042594,GO:…	K
Mj-3033	ROT78860.1	putative aspartate beta-hydroxylase domain-containing protein 2-like [Penaeus vannamei]	87.57	0	662	#N/A	O
Mj-3041	#N/A	#N/A	#N/A	#N/A	#N/A	#N/A	#N/A
Mj-3042	ROT67304.1	PDGF/VEGF-related factor 1 [Penaeus vannamei]	60.45	2e-50	173	#N/A	#N/A	cell growth-related
Mj-30594	XP_027238920.1	ribosomal RNA processing protein 1 homolog A-like [Penaeus vannamei]	81.21	6e-153	457	GO:0000785,GO:0000791,GO:0000792,GO:0001652,GO:0003674,GO:0003712,GO:0003713,GO:0005575,GO:0005622,GO:0005623,GO:0005634,GO:0005694,GO:0005730,GO:0006139,GO:0006355,GO:0006357,GO:0006364,GO:0006396,GO:0006725,GO:0006807,GO:0008150,GO:0008152,GO:0009605,GO:0009607,GO:0009615,GO:0009889,GO:0009891,GO:0009892,GO:0009893,GO:0009987,GO:0010467,GO:0010468,GO:0010556,GO:0010557,GO:0010563,GO:0010604,GO:…	A
Mj-30604	XP_027228426.1	polypyrimidine tract-binding protein 1-like isoform X2 [Penaeus vannamei]	99.64	0	1072	#N/A	A
Mj-30608	XP_027228426.1	polypyrimidine tract-binding protein 1-like isoform X2 [Penaeus vannamei]	99.31	0	1115	#N/A	A
Mj-30612	ANA91274.1	dual oxidase [Penaeus japonicus]	99.94	0	3255	#N/A	PQ
Mj-30621	XP_027221314.1	LOW QUALITY PROTEIN: dedicator of cytokinesis protein 2-like [Penaeus vannamei]	93.88	0	1514	GO:0000003,GO:0000768,GO:0000902,GO:0001655,GO:0001667,GO:0001700,GO:0001726,GO:0002009,GO:0002064,GO:0002065,GO:0002066,GO:0002164,GO:0003006,GO:0003674,GO:0005085,GO:0005088,GO:0005089,GO:0005488,GO:0005515,GO:0005575,GO:0005622,GO:0005623,GO:0005737,GO:0005886,GO:0006928,GO:0006949,GO:0006996,GO:0007010,GO:0007275,GO:0007276,GO:0007281,GO:0007292,GO:0007297,GO:0007298,GO:0007391,GO:0007399,GO:…	T
Mj-30624	XP_027215915.1	protein mothers against dpp-like isoform X4 [Penaeus vannamei]	97.59	0	858	GO:0000003,GO:0000976,GO:0000977,GO:0000980,GO:0000981,GO:0001012,GO:0001067,GO:0001085,GO:0001102,GO:0001158,GO:0001654,GO:0001655,GO:0001700,GO:0001704,GO:0001706,GO:0001708,GO:0001711,GO:0001714,GO:0001745,GO:0002009,GO:0002064,GO:0002065,GO:0002066,GO:0002165,GO:0003002,GO:0003006,GO:0003156,GO:0003674,GO:0003676,GO:0003677,GO:0003690,GO:0003700,GO:0003705,GO:0003712,GO:0003713,GO:0005072,GO:…	K
Mj-30638	XP_027210202.1	SAFB-like transcription modulator isoform X1 [Penaeus vannamei]	97.72	0	590	GO:0000976,GO:0000977,GO:0000978,GO:0000987,GO:0001012,GO:0001067,GO:0003674,GO:0003676,GO:0003677,GO:0003682,GO:0003690,GO:0005488,GO:0005575,GO:0005622,GO:0005623,GO:0005634,GO:0005654,GO:0006325,GO:0006355,GO:0006357,GO:0006996,GO:0007154,GO:0007165,GO:0008150,GO:0008152,GO:0009719,GO:0009725,GO:0009755,GO:0009889,GO:0009891,GO:0009893,GO:0009987,GO:0010033,GO:0010468,GO:0010556,GO:0010557,GO:…	K
Mj-30667	XP_027207470.1	innexin inx3-like [Penaeus vannamei]	84.85	2e-162	474	#N/A	P
Mj-30669	ROT82403.1	innexin 7 [Penaeus vannamei]	88.73	1e-124	379	#N/A	P
Mj-30741	XP_027216449.1	sacsin-like [Penaeus vannamei]	69.48	0	2619	GO:0003674,GO:0005102,GO:0005488,GO:0005515,GO:0005575,GO:0005622,GO:0005623,GO:0005634,GO:0005737,GO:0005739,GO:0006457,GO:0008150,GO:0009987,GO:0030424,GO:0030425,GO:0030544,GO:0031072,GO:0036477,GO:0042995,GO:0043005,GO:0043226,GO:0043227,GO:0043229,GO:0043231,GO:0044087,GO:0044424,GO:0044444,GO:0044463,GO:0044464,GO:0044877,GO:0048519,GO:0048523,GO:0050750,GO:0050789,GO:0050794,GO:0051087,GO:…	S
Mj-30781	XP_027219702.1	cysteine-rich motor neuron 1 protein-like [Penaeus vannamei]	78.85	5e-37	134	#N/A	#N/A
Mj-30785	XP_027219702.1	cysteine-rich motor neuron 1 protein-like [Penaeus vannamei]	78.85	5e-38	136	#N/A	#N/A
Mj-30846	ROT65793.1	hypothetical protein C7M84_016241 [Penaeus vannamei]	95.35	9e-81	257	GO:0003674,GO:0003824,GO:0004370,GO:0005575,GO:0005622,GO:0005623,GO:0005737,GO:0005739,GO:0005975,GO:0006066,GO:0006071,GO:0006072,GO:0006629,GO:0006638,GO:0006639,GO:0006641,GO:0006793,GO:0006796,GO:0008150,GO:0008152,GO:0009058,GO:0009987,GO:0016301,GO:0016310,GO:0016740,GO:0016772,GO:0016773,GO:0019400,GO:0019637,GO:0019751,GO:0043226,GO:0043227,GO:0043229,GO:0043231,GO:0044237,GO:0044238,GO:…	G
Mj-30884	XP_027225377.1	acylglycerol kinase, mitochondrial-like [Penaeus vannamei]	87.23	0	695	GO:0000003,GO:0001727,GO:0001729,GO:0003674,GO:0003824,GO:0006629,GO:0006643,GO:0006665,GO:0006672,GO:0006793,GO:0006796,GO:0006807,GO:0006928,GO:0007276,GO:0007280,GO:0008150,GO:0008152,GO:0008354,GO:0009987,GO:0016301,GO:0016310,GO:0016477,GO:0016740,GO:0016772,GO:0019953,GO:0022412,GO:0022414,GO:0030258,GO:0032501,GO:0032504,GO:0034641,GO:0040011,GO:0043603,GO:0044237,GO:0044238,GO:0044255,GO:…	IT
Mj-3096	ROT63113.1	putative histone H2A.V-like [Penaeus vannamei]	100	3e-64	208	GO:0000228,GO:0000785,GO:0000786,GO:0000790,GO:0003674,GO:0003676,GO:0003677,GO:0005488,GO:0005575,GO:0005622,GO:0005623,GO:0005634,GO:0005694,GO:0005700,GO:0005701,GO:0006325,GO:0006342,GO:0006355,GO:0006996,GO:0008104,GO:0008150,GO:0009889,GO:0009890,GO:0009892,GO:0009987,GO:0010369,GO:0010468,GO:0010556,GO:0010558,GO:0010605,GO:0010629,GO:0016043,GO:0016458,GO:0019219,GO:0019222,GO:0019827,GO:…	B
Mj-31	XP_027206428.1	CCR4-NOT transcription complex subunit 1-like [Penaeus vannamei]	97.06	0	4435	GO:0000003,GO:0000175,GO:0000288,GO:0000289,GO:0000932,GO:0000956,GO:0002064,GO:0002065,GO:0002066,GO:0003006,GO:0003674,GO:0003824,GO:0004518,GO:0004527,GO:0004532,GO:0004535,GO:0004540,GO:0005198,GO:0005488,GO:0005515,GO:0005575,GO:0005622,GO:0005623,GO:0005737,GO:0006139,GO:0006401,GO:0006402,GO:0006417,GO:0006725,GO:0006807,GO:0007276,GO:0007281,GO:0007292,GO:0008150,GO:0008152,GO:0008408,GO:…	K
Mj-3111	XP_027233594.1	uncharacterized protein DDB_G0271670-like isoform X1 [Penaeus vannamei]	78.43	2e-141	422	#N/A	#N/A
Mj-3117	#N/A	#N/A	#N/A	#N/A	#N/A	#N/A	#N/A
Mj-3141	ROT77823.1	hemocyte kazal-type proteinase inhibitor [Penaeus vannamei]	65.93	8e-114	341	#N/A	#N/A	crayfish hemocyte marker
Mj-3164	ROT82403.1	innexin 7 [Penaeus vannamei]	85.9	0	616	#N/A	T
Mj-3166	#N/A	#N/A	#N/A	#N/A	#N/A	#N/A	#N/A
Mj-3180	#N/A	#N/A	#N/A	#N/A	#N/A	#N/A	#N/A
Mj-3185	#N/A	#N/A	#N/A	#N/A	#N/A	#N/A	#N/A
Mj-3187	ROT70668.1	hypothetical protein C7M84_011043 [Penaeus vannamei]	58.62	5e-22	96.3	#N/A	#N/A
Mj-3213	XP_027224546.1	glutathione peroxidase-like [Penaeus vannamei]	89.66	2e-70	224	#N/A	#N/A
Mj-322	XP_027212768.1	leukocyte receptor cluster member 8 homolog isoform X1 [Penaeus vannamei]	96.03	0	1012	#N/A	K
Mj-3220	ROT72185.1	putative arginase-2, mitochondrial-like [Penaeus vannamei]	85.15	0	591	GO:0000003,GO:0000050,GO:0001101,GO:0001505,GO:0001655,GO:0001657,GO:0001666,GO:0001817,GO:0001818,GO:0001822,GO:0001823,GO:0002237,GO:0002376,GO:0002682,GO:0002683,GO:0002694,GO:0002695,GO:0002791,GO:0002792,GO:0002828,GO:0002829,GO:0002831,GO:0002832,GO:0003008,GO:0003012,GO:0003674,GO:0003824,GO:0004053,GO:0005488,GO:0005515,GO:0005575,GO:0005622,GO:0005623,GO:0005737,GO:0005739,GO:0005759,GO:…	E
Mj-3227	ROT77258.1	hypothetical protein C7M84_004115 [Penaeus vannamei]	83.78	1e-52	176	#N/A	#N/A
Mj-3245	#N/A	#N/A	#N/A	#N/A	#N/A	#N/A	#N/A
Mj-3253	XP_027217277.1	G patch domain-containing protein 11-like isoform X2 [Penaeus vannamei]	87.59	9e-143	414	GO:0000775,GO:0000776,GO:0005575,GO:0005622,GO:0005623,GO:0005694,GO:0032991,GO:0043226,GO:0043228,GO:0043229,GO:0043232,GO:0044422,GO:0044424,GO:0044427,GO:0044446,GO:0044464,GO:0098687	A
Mj-326	XP_027217152.1	zinc finger CCCH domain-containing protein 6-like [Penaeus vannamei]	91.07	0	1203	#N/A	#N/A
Mj-3279	XP_027211718.1	uncharacterized protein LOC113804967 [Penaeus vannamei]	88.31	8e-80	248	#N/A	#N/A
Mj-331	ANA91274.1	dual oxidase [Penaeus japonicus]	99.94	0	3255	#N/A	PQ
Mj-334	XP_027227521.1	LOW QUALITY PROTEIN: uncharacterized protein LOC113819485 [Penaeus vannamei]	97.46	0	806	GO:0000149,GO:0001505,GO:0001703,GO:0001736,GO:0001738,GO:0002009,GO:0002164,GO:0002165,GO:0002168,GO:0003674,GO:0005488,GO:0005509,GO:0005515,GO:0005543,GO:0005544,GO:0005575,GO:0005623,GO:0005886,GO:0006810,GO:0006836,GO:0006887,GO:0006906,GO:0006996,GO:0007010,GO:0007015,GO:0007043,GO:0007154,GO:0007164,GO:0007267,GO:0007268,GO:0007269,GO:0007275,GO:0007369,GO:0007424,GO:0007431,GO:0007435,GO:…	TU
Mj-3399	#N/A	#N/A	#N/A	#N/A	#N/A	#N/A	#N/A
Mj-340	XP_027213756.1	WASH complex subunit 2C-like [Penaeus vannamei]	64.89	0	1043	#N/A	#N/A
Mj-3402	#N/A	#N/A	#N/A	#N/A	#N/A	#N/A	#N/A
Mj-341	ROT78863.1	hypothetical protein C7M84_002415 [Penaeus vannamei]	70.28	0	1082	#N/A	#N/A
Mj-342	XP_027229242.1	MOB kinase activator-like 2 [Penaeus vannamei]	97.81	0	574	GO:0000902,GO:0001654,GO:0001745,GO:0001751,GO:0001754,GO:0003008,GO:0003674,GO:0005488,GO:0005515,GO:0005575,GO:0005622,GO:0005623,GO:0005737,GO:0005886,GO:0006996,GO:0007275,GO:0007399,GO:0007423,GO:0007610,GO:0007611,GO:0007613,GO:0007616,GO:0008150,GO:0008582,GO:0009653,GO:0009887,GO:0009987,GO:0016020,GO:0016028,GO:0016043,GO:0019899,GO:0019900,GO:0019901,GO:0022008,GO:0030154,GO:0030182,GO:…	D
Mj-3420	ROT82439.1	sodium/potassium-transporting ATPase subunit beta [Penaeus vannamei]	50	7e-102	311	GO:0003008,GO:0007600,GO:0007605,GO:0008150,GO:0009605,GO:0009612,GO:0009628,GO:0010996,GO:0032501,GO:0050877,GO:0050896,GO:0050954	P
Mj-343	XP_027228907.1	poly [ADP-ribose] polymerase 3-like [Penaeus vannamei]	45.19	8e-22	100	GO:0000723,GO:0003674,GO:0003824,GO:0003909,GO:0003910,GO:0003950,GO:0005575,GO:0005622,GO:0005623,GO:0005634,GO:0005694,GO:0005737,GO:0005814,GO:0005815,GO:0005856,GO:0006139,GO:0006259,GO:0006260,GO:0006261,GO:0006266,GO:0006271,GO:0006273,GO:0006281,GO:0006302,GO:0006464,GO:0006471,GO:0006725,GO:0006807,GO:0006950,GO:0006974,GO:0006996,GO:0007346,GO:0008104,GO:0008150,GO:0008152,GO:0009058,GO:…	KLO
Mj-3438	XP_027213076.1	uncharacterized protein DDB_G0271670-like [Penaeus vannamei]	69.62	1e-37	145	#N/A	#N/A
Mj-3440	#N/A	#N/A	#N/A	#N/A	#N/A	#N/A	#N/A
Mj-3481	#N/A	#N/A	#N/A	#N/A	#N/A	#N/A	#N/A
Mj-3482	XP_027216623.1	uncharacterized protein LOC113809282 [Penaeus vannamei]	63.64	3e-94	287	#N/A	#N/A
Mj-35	XP_027222898.1	serine/arginine repetitive matrix protein 2-like isoform X4 [Penaeus vannamei]	71.22	0	2653	#N/A	#N/A
Mj-3528	#N/A	#N/A	#N/A	#N/A	#N/A	#N/A	#N/A
Mj-3551	ROT66544.1	putative gamma-butyrobetaine dioxygenase-like [Penaeus vannamei]	93.63	7e-92	278	GO:0003674,GO:0003824,GO:0005488,GO:0005515,GO:0005575,GO:0005622,GO:0005623,GO:0005737,GO:0005829,GO:0006575,GO:0006577,GO:0006578,GO:0006807,GO:0008150,GO:0008152,GO:0008270,GO:0008336,GO:0009058,GO:0009437,GO:0009987,GO:0016491,GO:0016705,GO:0016706,GO:0034641,GO:0042398,GO:0042802,GO:0043167,GO:0043169,GO:0044237,GO:0044249,GO:0044271,GO:0044424,GO:0044444,GO:0044464,GO:0045329,GO:0046872,GO:…	I
Mj-3554	#N/A	#N/A	#N/A	#N/A	#N/A	#N/A	#N/A
Mj-3555	#N/A	#N/A	#N/A	#N/A	#N/A	#N/A	#N/A
Mj-3618	#N/A	#N/A	#N/A	#N/A	#N/A	#N/A	#N/A
Mj-3650	XP_027212648.1	uncharacterized protein LOC113805784 isoform X2 [Penaeus vannamei]	92	4e-30	113	#N/A	#N/A
Mj-3691	AOC37840.1	profilin, partial [Penaeus vannamei]	72.8	3e-51	171	#N/A	Z
Mj-370	ACL14651.1	focal adhesion kinase [Penaeus japonicus]	99.71	0	1844	GO:0001932,GO:0001933,GO:0002376,GO:0003674,GO:0003824,GO:0004672,GO:0004713,GO:0004715,GO:0005102,GO:0005488,GO:0005515,GO:0005575,GO:0005622,GO:0005623,GO:0005886,GO:0005912,GO:0005924,GO:0005925,GO:0006464,GO:0006468,GO:0006469,GO:0006793,GO:0006796,GO:0006807,GO:0006950,GO:0006952,GO:0006955,GO:0006996,GO:0007010,GO:0007016,GO:0008104,GO:0008150,GO:0008152,GO:0008582,GO:0009892,GO:0009898,GO:…	T
Mj-371	XP_027230741.1	protein phosphatase 1 regulatory subunit 12A-like isoform X5 [Penaeus vannamei]	97.86	9e-54	208	GO:0000003,GO:0000902,GO:0000904,GO:0001700,GO:0002009,GO:0002165,GO:0003006,GO:0005575,GO:0005622,GO:0005623,GO:0005737,GO:0005938,GO:0007275,GO:0007276,GO:0007281,GO:0007292,GO:0007391,GO:0007399,GO:0007409,GO:0007444,GO:0007472,GO:0007476,GO:0007552,GO:0007560,GO:0008150,GO:0008544,GO:0009653,GO:0009790,GO:0009791,GO:0009792,GO:0009886,GO:0009887,GO:0009888,GO:0009913,GO:0009987,GO:0016043,GO:…	OT
Mj-3716	ALL27071.1	vascular endothelial growth factor 1 [Penaeus vannamei]	68.52	9e-98	296	GO:0000003,GO:0001655,GO:0001667,GO:0001932,GO:0001934,GO:0002009,GO:0002064,GO:0002065,GO:0002066,GO:0002376,GO:0002520,GO:0003006,GO:0003674,GO:0005102,GO:0005126,GO:0005172,GO:0005488,GO:0005515,GO:0005539,GO:0005575,GO:0005576,GO:0005615,GO:0005622,GO:0005623,GO:0005737,GO:0006928,GO:0007154,GO:0007165,GO:0007166,GO:0007167,GO:0007169,GO:0007275,GO:0007276,GO:0007281,GO:0007292,GO:0007297,GO:…	G	cell growth-related
Mj-373	XP_027206580.1	serine/threonine-protein phosphatase 2A catalytic subunit beta isoform, partial [Penaeus vannamei]	100	0	638	GO:0000003,GO:0000159,GO:0000226,GO:0000278,GO:0001654,GO:0001745,GO:0001751,GO:0001752,GO:0001754,GO:0001932,GO:0001933,GO:0003002,GO:0003006,GO:0003674,GO:0003824,GO:0004721,GO:0004722,GO:0005575,GO:0005622,GO:0005623,GO:0005737,GO:0005814,GO:0005815,GO:0005856,GO:0006464,GO:0006470,GO:0006793,GO:0006796,GO:0006807,GO:0006914,GO:0006996,GO:0007010,GO:0007017,GO:0007049,GO:0007051,GO:0007059,GO:…	T
Mj-3730	ROT68747.1	putative 40S ribosomal protein S17-like [Penaeus vannamei]	100	8e-88	266	#N/A	J
Mj-3771	XP_027224631.1	NADH dehydrogenase [ubiquinone] iron-sulfur protein 5-like [Penaeus vannamei]	98.04	1e-68	215	GO:0003674,GO:0003824,GO:0003954,GO:0005575,GO:0005622,GO:0005623,GO:0005737,GO:0005739,GO:0005740,GO:0005743,GO:0005746,GO:0005747,GO:0006091,GO:0006119,GO:0006120,GO:0006139,GO:0006163,GO:0006725,GO:0006753,GO:0006793,GO:0006796,GO:0006807,GO:0008150,GO:0008152,GO:0009117,GO:0009123,GO:0009126,GO:0009141,GO:0009144,GO:0009150,GO:0009161,GO:0009167,GO:0009199,GO:0009205,GO:0009259,GO:0009987,GO:…	C
Mj-3787	ABW88999.1	double WAP domain-containing protein [Penaeus japonicus]	99.15	3e-56	184	#N/A	#N/A	AMPs and lysozyme-related
Mj-3847	XP_027234952.1	diacylglycerol kinase kappa-like [Penaeus vannamei]	64.06	2e-90	278	#N/A	#N/A
Mj-3866	XP_027216947.1	40S ribosomal protein S4-like [Penaeus vannamei]	98.85	0	529	GO:0002181,GO:0003674,GO:0003676,GO:0003723,GO:0003735,GO:0005198,GO:0005488,GO:0005575,GO:0005622,GO:0005623,GO:0005737,GO:0005829,GO:0005840,GO:0006412,GO:0006518,GO:0006807,GO:0008150,GO:0008152,GO:0009058,GO:0009059,GO:0009987,GO:0010467,GO:0015935,GO:0019538,GO:0022626,GO:0022627,GO:0032991,GO:0034641,GO:0034645,GO:0043043,GO:0043170,GO:0043226,GO:0043228,GO:0043229,GO:0043232,GO:0043603,GO:…	J
Mj-3873	XP_027207811.1	protein jagunal-like isoform X2 [Penaeus vannamei]	98.44	2e-130	376	GO:0000003,GO:0001555,GO:0003006,GO:0005575,GO:0005622,GO:0005623,GO:0005737,GO:0005783,GO:0005789,GO:0006810,GO:0006887,GO:0006996,GO:0007028,GO:0007029,GO:0007275,GO:0007276,GO:0007281,GO:0007292,GO:0007296,GO:0007423,GO:0008150,GO:0008407,GO:0009653,GO:0009887,GO:0009987,GO:0009994,GO:0010256,GO:0012505,GO:0016020,GO:0016043,GO:0016049,GO:0016192,GO:0019953,GO:0022412,GO:0022414,GO:0022416,GO:…	A
Mj-3880	#N/A	#N/A	#N/A	#N/A	#N/A	#N/A	#N/A
Mj-3893	ROT74216.1	hypothetical protein C7M84_007287 [Penaeus vannamei]	86.94	0	620	GO:0000313,GO:0000314,GO:0003674,GO:0003735,GO:0005198,GO:0005575,GO:0005622,GO:0005623,GO:0005737,GO:0005739,GO:0005759,GO:0005761,GO:0005763,GO:0005840,GO:0006412,GO:0006518,GO:0006807,GO:0008150,GO:0008152,GO:0009058,GO:0009059,GO:0009987,GO:0010467,GO:0015935,GO:0019538,GO:0031974,GO:0032543,GO:0032991,GO:0034641,GO:0034645,GO:0043043,GO:0043170,GO:0043226,GO:0043227,GO:0043228,GO:0043229,GO:…	J
Mj-3895	#N/A	#N/A	#N/A	#N/A	#N/A	#N/A	#N/A
Mj-3923	#N/A	#N/A	#N/A	#N/A	#N/A	#N/A	#N/A
Mj-3955	AGG55290.1	ribosomal protein L18 [Penaeus vannamei]	95.21	1e-125	363	GO:0002181,GO:0003674,GO:0003676,GO:0003723,GO:0003735,GO:0005198,GO:0005488,GO:0005575,GO:0005622,GO:0005623,GO:0005737,GO:0005829,GO:0005840,GO:0006412,GO:0006518,GO:0006807,GO:0008150,GO:0008152,GO:0009058,GO:0009059,GO:0009987,GO:0010467,GO:0015934,GO:0019538,GO:0022625,GO:0022626,GO:0032991,GO:0034641,GO:0034645,GO:0043043,GO:0043170,GO:0043226,GO:0043228,GO:0043229,GO:0043232,GO:0043603,GO:…	J
Mj-396	XP_027212150.1	CD63 antigen-like [Penaeus vannamei]	79.59	2e-114	364	GO:0005575,GO:0005623,GO:0005886,GO:0005887,GO:0007154,GO:0007165,GO:0007166,GO:0008150,GO:0009987,GO:0016020,GO:0016021,GO:0023052,GO:0031224,GO:0031226,GO:0044425,GO:0044459,GO:0044464,GO:0050789,GO:0050794,GO:0050896,GO:0051716,GO:0065007,GO:0071944	S
Mj-3981	#N/A	#N/A	#N/A	#N/A	#N/A	#N/A	#N/A
Mj-4019	BBC20610.1	hypothetical protein [Penaeus japonicus]	97.96	1e-86	262	#N/A	#N/A
Mj-405	XP_027207618.1	glycine-rich RNA-binding protein 10-like isoform X3 [Penaeus vannamei]	100	6e-57	203	#N/A	A
Mj-406	XP_027236107.1	unconventional myosin-Va-like [Penaeus vannamei]	99.5	0	802	GO:0000003,GO:0000166,GO:0001654,GO:0001745,GO:0001751,GO:0001754,GO:0003006,GO:0003674,GO:0003779,GO:0003824,GO:0005488,GO:0005515,GO:0005516,GO:0005524,GO:0005575,GO:0005622,GO:0005623,GO:0005856,GO:0006810,GO:0006886,GO:0006928,GO:0006996,GO:0007017,GO:0007018,GO:0007275,GO:0007276,GO:0007281,GO:0007283,GO:0007286,GO:0007291,GO:0007317,GO:0007349,GO:0007399,GO:0007423,GO:0008092,GO:0008104,GO:…	Z
Mj-4096	ROT64653.1	ribosomal protein S9 [Penaeus vannamei]	99.45	4e-124	358	GO:0002181,GO:0003674,GO:0003676,GO:0003723,GO:0003735,GO:0005198,GO:0005488,GO:0005575,GO:0005622,GO:0005623,GO:0005634,GO:0005730,GO:0005737,GO:0005829,GO:0005840,GO:0006412,GO:0006417,GO:0006450,GO:0006518,GO:0006807,GO:0008150,GO:0008152,GO:0009058,GO:0009059,GO:0009889,GO:0009891,GO:0009893,GO:0009987,GO:0010467,GO:0010468,GO:0010556,GO:0010557,GO:0010604,GO:0010608,GO:0010628,GO:0015935,GO:…	J
Mj-4097	ROT73753.1	nm23 [Penaeus vannamei]	98.26	2e-122	353	GO:0001726,GO:0003674,GO:0003824,GO:0004550,GO:0005575,GO:0005622,GO:0005623,GO:0005737,GO:0006139,GO:0006165,GO:0006355,GO:0006357,GO:0006725,GO:0006753,GO:0006793,GO:0006796,GO:0006807,GO:0007154,GO:0007165,GO:0007166,GO:0007229,GO:0008150,GO:0008152,GO:0009117,GO:0009132,GO:0009889,GO:0009891,GO:0009893,GO:0009987,GO:0010468,GO:0010556,GO:0010557,GO:0010604,GO:0010628,GO:0010941,GO:0016301,GO:…	F
Mj-4098	#N/A	#N/A	#N/A	#N/A	#N/A	#N/A	#N/A
Mj-415	#N/A	#N/A	#N/A	#N/A	#N/A	#N/A	#N/A
Mj-416	XP_027206478.1	paxillin-like [Penaeus vannamei]	94.59	0	592	GO:0000003,GO:0002064,GO:0002065,GO:0002066,GO:0003006,GO:0005575,GO:0005912,GO:0005924,GO:0005925,GO:0005927,GO:0006996,GO:0007010,GO:0007016,GO:0007275,GO:0007276,GO:0007281,GO:0007292,GO:0007304,GO:0007306,GO:0007444,GO:0008104,GO:0008150,GO:0009653,GO:0009888,GO:0009894,GO:0009987,GO:0010506,GO:0010830,GO:0010927,GO:0016043,GO:0019222,GO:0019953,GO:0022412,GO:0022414,GO:0022603,GO:0022607,GO:…	TZ
Mj-4196	#N/A	#N/A	#N/A	#N/A	#N/A	#N/A	#N/A
Mj-421	BAH98114.1	GTP binding protein alpha subunit Go [Penaeus japonicus]	100	0	740	GO:0000166,GO:0001664,GO:0001736,GO:0001737,GO:0001738,GO:0001882,GO:0001883,GO:0001885,GO:0002009,GO:0002064,GO:0002165,GO:0003007,GO:0003008,GO:0003158,GO:0003674,GO:0003824,GO:0003924,GO:0005102,GO:0005488,GO:0005515,GO:0005525,GO:0005575,GO:0005622,GO:0005623,GO:0005834,GO:0005886,GO:0006950,GO:0006996,GO:0007010,GO:0007043,GO:0007154,GO:0007155,GO:0007164,GO:0007165,GO:0007166,GO:0007186,GO:…	DT
Mj-4243	#N/A	#N/A	#N/A	#N/A	#N/A	#N/A	#N/A
Mj-4244	ROT62601.1	hypothetical protein C7M84_019554 [Penaeus vannamei]	37.39	5e-09	58.2	#N/A	#N/A
Mj-4248	#N/A	#N/A	#N/A	#N/A	#N/A	#N/A	#N/A
Mj-4262	XP_027219293.1	insulin-like growth factor-binding protein 4 [Penaeus vannamei]	42.34	1e-48	165	#N/A	S	cell growth-related
Mj-428	XP_027224234.1	uncharacterized protein LOC113816369 isoform X4 [Penaeus vannamei]	99.07	0	1103	GO:0000003,GO:0002009,GO:0002064,GO:0002065,GO:0002066,GO:0002165,GO:0003006,GO:0003674,GO:0005488,GO:0005543,GO:0005575,GO:0005622,GO:0005623,GO:0005737,GO:0005768,GO:0007009,GO:0007275,GO:0007276,GO:0007281,GO:0007292,GO:0007293,GO:0007399,GO:0007444,GO:0007472,GO:0007476,GO:0007552,GO:0007560,GO:0008150,GO:0008289,GO:0008544,GO:0009653,GO:0009791,GO:0009886,GO:0009887,GO:0009888,GO:0009913,GO:…	T
Mj-4305	#N/A	#N/A	#N/A	#N/A	#N/A	#N/A	#N/A
Mj-4364	ROT69407.1	heterochromatin-associated protein HP1, partial [Penaeus vannamei]	48.98	1e-08	54.3	#N/A	B
Mj-4373	ROT74357.1	QM protein [Penaeus vannamei]	96.63	1e-149	428	GO:0000027,GO:0002181,GO:0003674,GO:0003676,GO:0003723,GO:0003735,GO:0005198,GO:0005488,GO:0005575,GO:0005622,GO:0005623,GO:0005737,GO:0005829,GO:0005840,GO:0006412,GO:0006518,GO:0006807,GO:0006996,GO:0008150,GO:0008152,GO:0009058,GO:0009059,GO:0009987,GO:0010467,GO:0015934,GO:0016043,GO:0019538,GO:0022607,GO:0022613,GO:0022618,GO:0022625,GO:0022626,GO:0032991,GO:0034622,GO:0034641,GO:0034645,GO:…	J	melanization-related
Mj-4390	BBA54307.1	viral responsive protein [Penaeus japonicus]	99.32	5e-102	299	#N/A	#N/A	immune-related
Mj-4392	XP_027211403.1	60S ribosomal protein L35-like [Penaeus vannamei]	94.31	4e-60	191	GO:0000463,GO:0000470,GO:0002181,GO:0003674,GO:0003676,GO:0003723,GO:0003729,GO:0003735,GO:0005198,GO:0005488,GO:0005575,GO:0005622,GO:0005623,GO:0005737,GO:0005829,GO:0005840,GO:0006139,GO:0006364,GO:0006396,GO:0006412,GO:0006518,GO:0006725,GO:0006807,GO:0008150,GO:0008152,GO:0009058,GO:0009059,GO:0009987,GO:0010467,GO:0015934,GO:0016070,GO:0016072,GO:0019538,GO:0022613,GO:0022625,GO:0022626,GO:…	J
Mj-440	XP_027234146.1	shootin-1-like, partial [Penaeus vannamei]	85.21	4e-149	468	#N/A	S
Mj-441	XP_027225595.1	histone-lysine N-methyltransferase 2C-like, partial [Penaeus vannamei]	97.48	0	2266	#N/A	K
Mj-442	XP_037780946.1	pollen-specific leucine-rich repeat extensin-like protein 2 isoform X3 [Penaeus monodon]	94.07	4e-162	510	GO:0000003,GO:0001655,GO:0001667,GO:0001700,GO:0001763,GO:0002009,GO:0003006,GO:0003674,GO:0003700,GO:0005575,GO:0005622,GO:0005623,GO:0005634,GO:0006355,GO:0006357,GO:0006928,GO:0006996,GO:0007010,GO:0007163,GO:0007275,GO:0007391,GO:0007399,GO:0007417,GO:0007424,GO:0007426,GO:0007427,GO:0007428,GO:0007431,GO:0007435,GO:0007442,GO:0007443,GO:0007548,GO:0008104,GO:0008150,GO:0008258,GO:0008360,GO:…	S
Mj-4478	#N/A	#N/A	#N/A	#N/A	#N/A	#N/A	#N/A
Mj-4542	#N/A	#N/A	#N/A	#N/A	#N/A	#N/A	#N/A
Mj-4612	XP_027226155.1	uncharacterized protein LOC113818186 [Penaeus vannamei]	76.44	7e-66	226	GO:0001568,GO:0001655,GO:0001736,GO:0001738,GO:0001822,GO:0001944,GO:0002009,GO:0003205,GO:0003231,GO:0003279,GO:0003281,GO:0005575,GO:0005623,GO:0005929,GO:0006996,GO:0007164,GO:0007275,GO:0007399,GO:0007417,GO:0007420,GO:0007507,GO:0008104,GO:0008150,GO:0009653,GO:0009790,GO:0009888,GO:0009987,GO:0016043,GO:0021549,GO:0022037,GO:0022607,GO:0030030,GO:0030031,GO:0030326,GO:0030902,GO:0032501,GO:…	S
Mj-4623	BBC20610.1	hypothetical protein [Penaeus japonicus]	79.59	5e-63	198	#N/A	#N/A
Mj-4637	XP_027236694.1	wiskott-Aldrich syndrome protein-like [Penaeus vannamei]	93.67	1e-41	152	#N/A	#N/A
Mj-4668	ROT83077.1	hypothetical protein C7M84_023744 [Penaeus vannamei]	99.52	2e-154	433	GO:0000028,GO:0000184,GO:0000956,GO:0003674,GO:0003676,GO:0003723,GO:0003729,GO:0003735,GO:0005198,GO:0005488,GO:0005575,GO:0005622,GO:0005623,GO:0005634,GO:0005654,GO:0005737,GO:0005829,GO:0005840,GO:0006139,GO:0006401,GO:0006402,GO:0006412,GO:0006413,GO:0006450,GO:0006518,GO:0006605,GO:0006612,GO:0006613,GO:0006614,GO:0006725,GO:0006807,GO:0006810,GO:0006886,GO:0006996,GO:0008104,GO:0008150,GO:…	J
Mj-4696	XP_027236339.1	uncharacterized protein LOC113827641 [Penaeus vannamei]	67.14	4e-26	100	#N/A	#N/A
Mj-4763	ROT71165.1	hypothetical protein C7M84_010530 [Penaeus vannamei]	84.44	3e-137	391	#N/A	#N/A
Mj-4769	#N/A	#N/A	#N/A	#N/A	#N/A	#N/A	#N/A
Mj-4838	AME17862.1	ALFC2 [Penaeus japonicus]	100	7e-86	254	#N/A	#N/A	AMPs and lysozyme-related
Mj-498	ROT63850.1	hypothetical protein C7M84_018231 [Penaeus vannamei]	95.16	0	700	#N/A	TU
Mj-4985	#N/A	#N/A	#N/A	#N/A	#N/A	#N/A	#N/A
Mj-5053	#N/A	#N/A	#N/A	#N/A	#N/A	#N/A	#N/A
Mj-5090	#N/A	#N/A	#N/A	#N/A	#N/A	#N/A	#N/A
Mj-5100	XP_027236577.1	40S ribosomal protein S19-like [Penaeus vannamei]	93.24	1e-85	254	GO:0000028,GO:0002181,GO:0003674,GO:0003735,GO:0005198,GO:0005575,GO:0005622,GO:0005623,GO:0005737,GO:0005829,GO:0005840,GO:0006412,GO:0006518,GO:0006807,GO:0006996,GO:0008150,GO:0008152,GO:0009058,GO:0009059,GO:0009987,GO:0010467,GO:0015935,GO:0016043,GO:0019538,GO:0022607,GO:0022613,GO:0022618,GO:0022626,GO:0022627,GO:0032991,GO:0034622,GO:0034641,GO:0034645,GO:0042254,GO:0042255,GO:0042274,GO:…	J
Mj-5103	XP_027236339.1	uncharacterized protein LOC113827641 [Penaeus vannamei]	67.14	2e-26	100	#N/A	#N/A
Mj-5108	ROT79987.1	hypothetical protein C7M84_001258 [Penaeus vannamei]	92.31	2e-85	259	GO:0002181,GO:0003674,GO:0003735,GO:0005198,GO:0005575,GO:0005622,GO:0005623,GO:0005737,GO:0005829,GO:0005840,GO:0006412,GO:0006464,GO:0006518,GO:0006807,GO:0008150,GO:0008152,GO:0009058,GO:0009059,GO:0009987,GO:0010467,GO:0015935,GO:0016567,GO:0019538,GO:0022626,GO:0022627,GO:0031386,GO:0032446,GO:0032991,GO:0034641,GO:0034645,GO:0036211,GO:0043043,GO:0043170,GO:0043226,GO:0043228,GO:0043229,GO:…	J
Mj-511	XP_027206751.1	dolichyl-diphosphooligosaccharide--protein glycosyltransferase subunit STT3B-like [Penaeus vannamei]	99.35	0	1420	GO:0003674,GO:0003824,GO:0004576,GO:0004579,GO:0005575,GO:0005622,GO:0005623,GO:0005737,GO:0005783,GO:0005789,GO:0006464,GO:0006486,GO:0006487,GO:0006807,GO:0008150,GO:0008152,GO:0008250,GO:0009058,GO:0009059,GO:0009100,GO:0009101,GO:0009987,GO:0012505,GO:0016020,GO:0016740,GO:0016757,GO:0016758,GO:0018193,GO:0018196,GO:0018279,GO:0019538,GO:0031984,GO:0032991,GO:0034645,GO:0036211,GO:0042175,GO:…	O
Mj-5167	#N/A	#N/A	#N/A	#N/A	#N/A	#N/A	#N/A
Mj-5189	ROT73440.1	40S ribosomal protein S20 [Penaeus vannamei]	100	5e-69	210	GO:0002181,GO:0003674,GO:0003735,GO:0005198,GO:0005575,GO:0005622,GO:0005623,GO:0005737,GO:0005829,GO:0005840,GO:0006412,GO:0006518,GO:0006807,GO:0008150,GO:0008152,GO:0009058,GO:0009059,GO:0009987,GO:0010467,GO:0015935,GO:0019538,GO:0022626,GO:0022627,GO:0032991,GO:0034641,GO:0034645,GO:0043043,GO:0043170,GO:0043226,GO:0043228,GO:0043229,GO:0043232,GO:0043603,GO:0043604,GO:0044237,GO:0044238,GO:…	J
Mj-5209	BAW78902.1	single VWC domain protein 5 [Penaeus japonicus]	91.26	6e-63	194	#N/A	#N/A	immune-related
Mj-5269	XP_027237926.1	ubiquitin-60S ribosomal protein L40 [Penaeus vannamei]	97.87	4e-96	281	GO:0002181,GO:0003674,GO:0003735,GO:0005198,GO:0005575,GO:0005622,GO:0005623,GO:0005737,GO:0005829,GO:0005840,GO:0006412,GO:0006464,GO:0006508,GO:0006511,GO:0006518,GO:0006807,GO:0008150,GO:0008152,GO:0009056,GO:0009057,GO:0009058,GO:0009059,GO:0009987,GO:0010467,GO:0015934,GO:0016567,GO:0019538,GO:0019941,GO:0022625,GO:0022626,GO:0030163,GO:0031386,GO:0032446,GO:0032991,GO:0034641,GO:0034645,GO:…	J
Mj-5290	#N/A	#N/A	#N/A	#N/A	#N/A	#N/A	#N/A
Mj-53	XP_027239093.1	myosin heavy chain, non-muscle-like [Penaeus vannamei]	96.63	0	3356	GO:0000003,GO:0000278,GO:0000281,GO:0000910,GO:0001654,GO:0001655,GO:0001667,GO:0001700,GO:0001736,GO:0001738,GO:0001745,GO:0001894,GO:0002009,GO:0002064,GO:0002065,GO:0002066,GO:0002165,GO:0003002,GO:0003006,GO:0003008,GO:0003012,GO:0003674,GO:0003774,GO:0003824,GO:0005488,GO:0005515,GO:0005575,GO:0005622,GO:0005623,GO:0005737,GO:0005826,GO:0005856,GO:0005886,GO:0005911,GO:0005938,GO:0006928,GO:…	Z	phagocytosis-related
Mj-531	ROT70691.1	putative E3 ubiquitin-protein ligase TRIM32 [Penaeus vannamei]	48.09	3e-137	436	GO:0000209,GO:0001558,GO:0001817,GO:0001819,GO:0001894,GO:0001959,GO:0001961,GO:0002376,GO:0003674,GO:0003676,GO:0003712,GO:0003713,GO:0003723,GO:0003824,GO:0004842,GO:0005488,GO:0005515,GO:0005575,GO:0005622,GO:0005623,GO:0005634,GO:0005737,GO:0005829,GO:0005856,GO:0005859,GO:0005863,GO:0006355,GO:0006464,GO:0006508,GO:0006511,GO:0006807,GO:0006950,GO:0006952,GO:0006955,GO:0006996,GO:0007010,GO:…	O
Mj-5362	#N/A	#N/A	#N/A	#N/A	#N/A	#N/A	#N/A
Mj-54	AOD27418.1	Notch [Penaeus vannamei]	96.32	0	4572	GO:0000003,GO:0000122,GO:0000278,GO:0000578,GO:0000902,GO:0000904,GO:0001654,GO:0001655,GO:0001667,GO:0001700,GO:0001708,GO:0001709,GO:0001736,GO:0001738,GO:0001745,GO:0001751,GO:0001752,GO:0001754,GO:0001894,GO:0001932,GO:0001933,GO:0002009,GO:0002052,GO:0002064,GO:0002065,GO:0002066,GO:0002164,GO:0002165,GO:0002213,GO:0002376,GO:0002520,GO:0002682,GO:0002683,GO:0002684,GO:0003002,GO:0003006,GO:…	T	immune-related
Mj-5414	ROT78219.1	hypothetical protein C7M84_003077 [Penaeus vannamei]	97.39	2e-101	310	#N/A	#N/A
Mj-5513	#N/A	#N/A	#N/A	#N/A	#N/A	#N/A	#N/A
Mj-556	XP_027212924.1	protein FAM13A-like isoform X1 [Penaeus vannamei]	90.6	0	880	#N/A	T
Mj-56	XP_027214032.1	transcriptional regulator ATRX-like [Penaeus vannamei]	90.92	0	1707	GO:0000775,GO:0000785,GO:0000792,GO:0000902,GO:0000904,GO:0001674,GO:0001932,GO:0003674,GO:0003824,GO:0005575,GO:0005622,GO:0005623,GO:0005634,GO:0005694,GO:0005700,GO:0005701,GO:0005721,GO:0005722,GO:0006323,GO:0006325,GO:0006333,GO:0006334,GO:0006336,GO:0006342,GO:0006355,GO:0006915,GO:0006928,GO:0006935,GO:0006996,GO:0007154,GO:0007165,GO:0007275,GO:0007399,GO:0007409,GO:0007411,GO:0008150,GO:…	K
Mj-5658	AAS38513.1	single WAP domain-containing protein [Penaeus vannamei]	63.74	8e-19	79	#N/A	T	AMPs and lysozyme-related
Mj-5684	XP_027207162.1	40S ribosomal protein S26-like [Penaeus vannamei]	100	2e-72	217	GO:0002181,GO:0003674,GO:0003676,GO:0003723,GO:0003729,GO:0003735,GO:0005198,GO:0005488,GO:0005575,GO:0005622,GO:0005623,GO:0005737,GO:0005783,GO:0005789,GO:0005791,GO:0005829,GO:0005840,GO:0005844,GO:0006412,GO:0006518,GO:0006807,GO:0008150,GO:0008152,GO:0009058,GO:0009059,GO:0009987,GO:0010467,GO:0012505,GO:0015935,GO:0016020,GO:0019538,GO:0022626,GO:0022627,GO:0030867,GO:0031090,GO:0031984,GO:…	J
Mj-5718	XP_027209168.1	venom protein 302-like [Penaeus vannamei]	72.73	7e-27	100	#N/A	S
Mj-589	#N/A	#N/A	#N/A	#N/A	#N/A	#N/A	#N/A
Mj-5978	ROT82748.1	putative 60S ribosomal protein L37a [Penaeus vannamei]	99.03	2e-67	213	GO:0002181,GO:0003674,GO:0003735,GO:0005198,GO:0005575,GO:0005622,GO:0005623,GO:0005737,GO:0005829,GO:0005840,GO:0006412,GO:0006518,GO:0006807,GO:0008150,GO:0008152,GO:0009058,GO:0009059,GO:0009987,GO:0010467,GO:0015934,GO:0019538,GO:0022625,GO:0022626,GO:0032991,GO:0034641,GO:0034645,GO:0043043,GO:0043170,GO:0043226,GO:0043228,GO:0043229,GO:0043232,GO:0043603,GO:0043604,GO:0044237,GO:0044238,GO:…	J
Mj-6	XP_027232720.1	LOW QUALITY PROTEIN: hemocytin-like [Penaeus vannamei]	88.62	0	7432	GO:0002376,GO:0003674,GO:0005488,GO:0005515,GO:0005575,GO:0005576,GO:0006950,GO:0006952,GO:0006955,GO:0006959,GO:0007599,GO:0008150,GO:0009611,GO:0032501,GO:0042060,GO:0042381,GO:0042802,GO:0042803,GO:0045087,GO:0046983,GO:0050817,GO:0050878,GO:0050896,GO:0065007,GO:0065008	VW	clotting-related
Mj-608	XP_027206906.1	ras-related protein M-Ras-like [Penaeus vannamei]	100	3e-108	344	#N/A	S
Mj-6091	#N/A	#N/A	#N/A	#N/A	#N/A	#N/A	#N/A
Mj-618	XP_027214054.1	src substrate cortactin-like isoform X2 [Penaeus vannamei]	92.35	0	872	#N/A	#N/A
Mj-6184	XP_027216262.1	60S ribosomal protein L37-like [Penaeus vannamei]	95.65	2e-57	177	GO:0002181,GO:0003674,GO:0003676,GO:0003723,GO:0003735,GO:0005198,GO:0005488,GO:0005575,GO:0005622,GO:0005623,GO:0005737,GO:0005829,GO:0005840,GO:0006412,GO:0006518,GO:0006807,GO:0008150,GO:0008152,GO:0009058,GO:0009059,GO:0009987,GO:0010467,GO:0015934,GO:0019538,GO:0022625,GO:0022626,GO:0032991,GO:0034641,GO:0034645,GO:0043043,GO:0043170,GO:0043226,GO:0043228,GO:0043229,GO:0043232,GO:0043603,GO:…	J
Mj-62	XP_027229721.1	uncharacterized protein LOC113821425 isoform X3 [Penaeus vannamei]	83.65	0	2458	#N/A	#N/A
Mj-623	#N/A	#N/A	#N/A	#N/A	#N/A	#N/A	#N/A
Mj-6249	#N/A	#N/A	#N/A	#N/A	#N/A	#N/A	#N/A
Mj-6250	#N/A	#N/A	#N/A	#N/A	#N/A	#N/A	#N/A
Mj-6281	#N/A	#N/A	#N/A	#N/A	#N/A	#N/A	#N/A
Mj-6287	#N/A	#N/A	#N/A	#N/A	#N/A	#N/A	#N/A
Mj-63	XP_027223695.1	uncharacterized protein LOC113815876 [Penaeus vannamei]	92.09	0	3360	#N/A	#N/A
Mj-632	ROT76762.1	hypothetical protein C7M84_004635 [Penaeus vannamei]	99.56	2e-114	363	GO:0000226,GO:0003674,GO:0005488,GO:0005515,GO:0005575,GO:0005622,GO:0005623,GO:0005737,GO:0006996,GO:0007010,GO:0007017,GO:0008150,GO:0009987,GO:0016043,GO:0030029,GO:0030036,GO:0032991,GO:0035770,GO:0036464,GO:0043186,GO:0043226,GO:0043228,GO:0043229,GO:0043232,GO:0044424,GO:0044444,GO:0044464,GO:0045169,GO:0045495,GO:0060293,GO:0071840,GO:1990904	U
Mj-6356	#N/A	#N/A	#N/A	#N/A	#N/A	#N/A	#N/A
Mj-6416	#N/A	#N/A	#N/A	#N/A	#N/A	#N/A	#N/A
Mj-6503	#N/A	#N/A	#N/A	#N/A	#N/A	#N/A	#N/A
Mj-6512	#N/A	#N/A	#N/A	#N/A	#N/A	#N/A	#N/A
Mj-6531	#N/A	#N/A	#N/A	#N/A	#N/A	#N/A	#N/A
Mj-6537	#N/A	#N/A	#N/A	#N/A	#N/A	#N/A	#N/A
Mj-6596	#N/A	#N/A	#N/A	#N/A	#N/A	#N/A	#N/A
Mj-66	XP_027229257.1	nucleoprotein TPR-like [Penaeus vannamei]	95.07	0	3159	GO:0000003,GO:0000022,GO:0000070,GO:0000075,GO:0000122,GO:0000226,GO:0000228,GO:0000278,GO:0000280,GO:0000775,GO:0000776,GO:0000785,GO:0000790,GO:0000791,GO:0000819,GO:0001672,GO:0003006,GO:0003674,GO:0003676,GO:0003677,GO:0003682,GO:0003723,GO:0003729,GO:0005198,GO:0005488,GO:0005515,GO:0005575,GO:0005622,GO:0005623,GO:0005634,GO:0005635,GO:0005643,GO:0005652,GO:0005654,GO:0005694,GO:0005719,GO:…	S
Mj-671	XP_027235019.1	suppressor protein SRP40-like [Penaeus vannamei]	94.88	1e-101	308	GO:0003674,GO:0003676,GO:0003723,GO:0005488,GO:0005575,GO:0005622,GO:0005623,GO:0005634,GO:0017069,GO:0043226,GO:0043227,GO:0043229,GO:0043231,GO:0044424,GO:0044464,GO:0097159,GO:0097322,GO:1901363	K
Mj-672	#N/A	#N/A	#N/A	#N/A	#N/A	#N/A	#N/A
Mj-6729	#N/A	#N/A	#N/A	#N/A	#N/A	#N/A	#N/A
Mj-6736	XP_027231078.1	mucin-7-like [Penaeus vannamei]	88.46	8e-07	45.8	#N/A	#N/A
Mj-70	XP_027214064.1	calponin homology domain-containing protein DDB_G0272472-like [Penaeus vannamei]	73.38	0	1153	#N/A	#N/A
Mj-7006	XP_027236561.1	RNA-binding protein 39-like [Penaeus vannamei]	100	0	692	GO:0000375,GO:0000377,GO:0000381,GO:0000398,GO:0003674,GO:0003676,GO:0003723,GO:0003729,GO:0005488,GO:0005575,GO:0005622,GO:0005623,GO:0005634,GO:0006139,GO:0006396,GO:0006397,GO:0006725,GO:0006807,GO:0008150,GO:0008152,GO:0008380,GO:0009987,GO:0010467,GO:0010468,GO:0016070,GO:0016071,GO:0019219,GO:0019222,GO:0031323,GO:0034641,GO:0043170,GO:0043226,GO:0043227,GO:0043229,GO:0043231,GO:0043484,GO:…	A
Mj-7018	XP_027216397.1	uncharacterized protein LOC113809109 [Penaeus vannamei]	71.26	0	720	#N/A	#N/A
Mj-702	AKC54416.1	syndecan precursor [Penaeus vannamei]	94.78	8e-122	382	GO:0000902,GO:0000904,GO:0001667,GO:0003008,GO:0005575,GO:0005623,GO:0005886,GO:0006928,GO:0006935,GO:0007275,GO:0007399,GO:0007409,GO:0007411,GO:0007424,GO:0007427,GO:0007600,GO:0007601,GO:0008045,GO:0008150,GO:0008582,GO:0009314,GO:0009416,GO:0009581,GO:0009582,GO:0009583,GO:0009584,GO:0009605,GO:0009628,GO:0009653,GO:0009986,GO:0009987,GO:0010001,GO:0010468,GO:0010631,GO:0016020,GO:0016043,GO:…	T
Mj-7020	ROT85959.1	RNA recognition motif (RRM) [Penaeus vannamei]	100	2e-141	412	GO:0000003,GO:0000184,GO:0000226,GO:0000375,GO:0000377,GO:0000398,GO:0000578,GO:0000785,GO:0000956,GO:0001667,GO:0002009,GO:0002064,GO:0002065,GO:0002066,GO:0003002,GO:0003006,GO:0003674,GO:0003676,GO:0003723,GO:0003729,GO:0003730,GO:0005488,GO:0005575,GO:0005622,GO:0005623,GO:0005634,GO:0005654,GO:0005694,GO:0005700,GO:0005703,GO:0005737,GO:0006139,GO:0006396,GO:0006397,GO:0006401,GO:0006402,GO:…	A
Mj-7025	ROT63453.1	ribosomal protein L10a [Penaeus vannamei]	96.86	2e-140	399	GO:0000470,GO:0002181,GO:0003674,GO:0003676,GO:0003723,GO:0003735,GO:0005198,GO:0005488,GO:0005575,GO:0005622,GO:0005623,GO:0005737,GO:0005829,GO:0005840,GO:0006139,GO:0006364,GO:0006396,GO:0006412,GO:0006518,GO:0006725,GO:0006807,GO:0008150,GO:0008152,GO:0009058,GO:0009059,GO:0009987,GO:0010467,GO:0015934,GO:0016070,GO:0016072,GO:0019538,GO:0022613,GO:0022625,GO:0022626,GO:0032991,GO:0034470,GO:…	J
Mj-7030	#N/A	#N/A	#N/A	#N/A	#N/A	#N/A	#N/A
Mj-7034	XP_037780560.1	ETS-like protein pointed isoform X1 [Penaeus monodon]	98.92	0	823	GO:0000003,GO:0000578,GO:0000981,GO:0001067,GO:0001654,GO:0001655,GO:0001667,GO:0001736,GO:0001738,GO:0001742,GO:0001745,GO:0001751,GO:0001752,GO:0001754,GO:0001763,GO:0002009,GO:0002064,GO:0002065,GO:0002066,GO:0002165,GO:0002682,GO:0003002,GO:0003006,GO:0003674,GO:0003676,GO:0003677,GO:0003700,GO:0005488,GO:0005515,GO:0005575,GO:0005622,GO:0005623,GO:0005634,GO:0006355,GO:0006357,GO:0006928,GO:…	K
Mj-7042	#N/A	#N/A	#N/A	#N/A	#N/A	#N/A	#N/A
Mj-7044	#N/A	#N/A	#N/A	#N/A	#N/A	#N/A	#N/A
Mj-7045	XP_027227483.1	chloride intracellular channel exc-4-like [Penaeus vannamei]	99.6	0	529	GO:0003674,GO:0005215,GO:0005216,GO:0005253,GO:0005254,GO:0005488,GO:0005509,GO:0005575,GO:0005622,GO:0005623,GO:0005737,GO:0005739,GO:0006810,GO:0006811,GO:0006820,GO:0006821,GO:0008150,GO:0008289,GO:0008509,GO:0009605,GO:0009628,GO:0009629,GO:0010033,GO:0015075,GO:0015103,GO:0015108,GO:0015267,GO:0015318,GO:0015698,GO:0016020,GO:0022803,GO:0022838,GO:0022857,GO:0034220,GO:0040011,GO:0042221,GO:…	P
Mj-7047	XP_027217575.1	heterogeneous nuclear ribonucleoprotein R-like [Penaeus vannamei]	98.45	0	871	GO:0000003,GO:0000375,GO:0000377,GO:0000398,GO:0002064,GO:0002065,GO:0002066,GO:0003002,GO:0003006,GO:0003674,GO:0003676,GO:0003723,GO:0003729,GO:0005488,GO:0005575,GO:0005622,GO:0005623,GO:0005634,GO:0006139,GO:0006396,GO:0006397,GO:0006417,GO:0006725,GO:0006807,GO:0007275,GO:0007276,GO:0007281,GO:0007292,GO:0007304,GO:0007306,GO:0007308,GO:0007309,GO:0007310,GO:0007389,GO:0008150,GO:0008152,GO:…	A
Mj-7049	BAE92940.1	anti-lipopolysaccharide factor like protein [Penaeus japonicus]	100	2e-66	206	#N/A	#N/A	AMPs and lysozyme-related
Mj-705	XP_027229833.1	uncharacterized protein LOC113821528 isoform X1 [Penaeus vannamei]	50.58	7e-90	306	#N/A	#N/A
Mj-7051	ROT62210.1	putative eukaryotic translation initiation factor 4 gamma 2 isoform X1 [Penaeus vannamei]	98.63	0	1499	GO:0003674,GO:0003676,GO:0003723,GO:0003729,GO:0003743,GO:0005488,GO:0006412,GO:0006413,GO:0006518,GO:0006807,GO:0007275,GO:0007423,GO:0008135,GO:0008150,GO:0008152,GO:0009058,GO:0009059,GO:0009987,GO:0010467,GO:0019538,GO:0022416,GO:0032501,GO:0032502,GO:0034641,GO:0034645,GO:0043043,GO:0043170,GO:0043603,GO:0043604,GO:0044237,GO:0044238,GO:0044249,GO:0044260,GO:0044267,GO:0044271,GO:0048513,GO:…	J
Mj-7056	XP_027231729.1	immediate early response gene 5 protein-like [Penaeus vannamei]	95.98	6e-121	357	#N/A	S
Mj-7058	ROT84483.1	ribosomal protein L3 [Penaeus vannamei]	95.65	0	762	GO:0000027,GO:0002181,GO:0003674,GO:0003676,GO:0003723,GO:0003735,GO:0005198,GO:0005488,GO:0005575,GO:0005622,GO:0005623,GO:0005737,GO:0005829,GO:0005840,GO:0006412,GO:0006518,GO:0006807,GO:0006996,GO:0008150,GO:0008152,GO:0009058,GO:0009059,GO:0009987,GO:0010467,GO:0015934,GO:0016043,GO:0019538,GO:0022607,GO:0022613,GO:0022618,GO:0022625,GO:0022626,GO:0032991,GO:0034622,GO:0034641,GO:0034645,GO:…	J
Mj-7063	ROT62934.1	putative transcription factor BTF3-like 4, partial [Penaeus vannamei]	97.42	3e-89	272	GO:0000003,GO:0000578,GO:0001700,GO:0003002,GO:0003006,GO:0003674,GO:0005215,GO:0005488,GO:0005515,GO:0005575,GO:0005622,GO:0005623,GO:0005737,GO:0005854,GO:0006403,GO:0006810,GO:0007028,GO:0007275,GO:0007276,GO:0007281,GO:0007292,GO:0007308,GO:0007309,GO:0007314,GO:0007315,GO:0007317,GO:0007318,GO:0007350,GO:0007351,GO:0007389,GO:0008104,GO:0008150,GO:0008298,GO:0008358,GO:0008565,GO:0008595,GO:…	K
Mj-7069	AGS38337.1	ERK [Penaeus vannamei]	100	0	751	GO:0000165,GO:0000278,GO:0000302,GO:0001654,GO:0001745,GO:0001751,GO:0001752,GO:0001754,GO:0002009,GO:0002165,GO:0002252,GO:0002376,GO:0003002,GO:0003674,GO:0003824,GO:0004672,GO:0004674,GO:0004707,GO:0005488,GO:0005515,GO:0005575,GO:0005622,GO:0005623,GO:0005634,GO:0005737,GO:0005829,GO:0006355,GO:0006357,GO:0006464,GO:0006468,GO:0006793,GO:0006796,GO:0006807,GO:0006950,GO:0006952,GO:0006979,GO:…	T	cell growth-related
Mj-7071	#N/A	#N/A	#N/A	#N/A	#N/A	#N/A	#N/A
Mj-7085	ROT62134.1	cathepsin L [Penaeus vannamei]	94.3	0	638	GO:0000323,GO:0003674,GO:0003824,GO:0004175,GO:0004197,GO:0005575,GO:0005576,GO:0005615,GO:0005622,GO:0005623,GO:0005737,GO:0005764,GO:0005773,GO:0006508,GO:0006807,GO:0008150,GO:0008152,GO:0008233,GO:0008234,GO:0009056,GO:0009057,GO:0009987,GO:0016787,GO:0019538,GO:0030163,GO:0043170,GO:0043226,GO:0043227,GO:0043229,GO:0043231,GO:0044237,GO:0044238,GO:0044248,GO:0044257,GO:0044260,GO:0044265,GO:…	O
Mj-7095	BAC99073.1	alpha2-macroglobulin homolog [Penaeus japonicus]	98.73	0	2866	#N/A	O	clotting-related
Mj-7098	XP_027238064.1	uncharacterized protein LOC113829163 isoform X1 [Penaeus vannamei]	62.84	5e-133	407	#N/A	#N/A
Mj-71	XP_027209913.1	myocardin-related transcription factor B-like isoform X2 [Penaeus vannamei]	95.11	0	1301	GO:0000003,GO:0001666,GO:0001667,GO:0002009,GO:0002064,GO:0002065,GO:0002066,GO:0002165,GO:0003006,GO:0003674,GO:0003712,GO:0003713,GO:0005488,GO:0005515,GO:0005575,GO:0005622,GO:0005623,GO:0005634,GO:0005737,GO:0006355,GO:0006357,GO:0006928,GO:0006950,GO:0006996,GO:0007010,GO:0007275,GO:0007276,GO:0007281,GO:0007292,GO:0007297,GO:0007298,GO:0007424,GO:0007444,GO:0007472,GO:0007476,GO:0007552,GO:…	S
Mj-7108	XP_027219256.1	microtubule-associated protein RP/EB family member 1-like isoform X1 [Penaeus vannamei]	98.15	9e-179	520	GO:0000022,GO:0000070,GO:0000226,GO:0000278,GO:0000280,GO:0000819,GO:0001700,GO:0002252,GO:0002376,GO:0003008,GO:0003674,GO:0005488,GO:0005515,GO:0005575,GO:0005622,GO:0005623,GO:0005737,GO:0005856,GO:0005874,GO:0005875,GO:0006582,GO:0006725,GO:0006950,GO:0006952,GO:0006955,GO:0006996,GO:0007010,GO:0007017,GO:0007049,GO:0007051,GO:0007052,GO:0007059,GO:0007163,GO:0007275,GO:0007423,GO:0007600,GO:…	Z
Mj-7112	XP_027233946.1	cyclin G-like [Penaeus vannamei]	99.69	0	560	GO:0000003,GO:0000280,GO:0000711,GO:0000731,GO:0001932,GO:0003674,GO:0004857,GO:0004864,GO:0005575,GO:0005622,GO:0005623,GO:0005694,GO:0005700,GO:0006139,GO:0006259,GO:0006281,GO:0006302,GO:0006725,GO:0006807,GO:0006950,GO:0006974,GO:0006996,GO:0007049,GO:0007143,GO:0007276,GO:0007292,GO:0007346,GO:0008150,GO:0008152,GO:0008593,GO:0009058,GO:0009059,GO:0009888,GO:0009892,GO:0009966,GO:0009967,GO:…	D
Mj-7115	XP_027225835.1	60S ribosomal protein L7a-like [Penaeus vannamei]	95.74	4e-141	405	GO:0000184,GO:0000470,GO:0000956,GO:0002181,GO:0003674,GO:0003676,GO:0003723,GO:0003735,GO:0005198,GO:0005488,GO:0005515,GO:0005516,GO:0005575,GO:0005622,GO:0005623,GO:0005737,GO:0005829,GO:0005840,GO:0005844,GO:0006139,GO:0006364,GO:0006396,GO:0006401,GO:0006402,GO:0006412,GO:0006413,GO:0006518,GO:0006605,GO:0006612,GO:0006613,GO:0006614,GO:0006725,GO:0006807,GO:0006810,GO:0006886,GO:0008104,GO:…	J
Mj-7122	XP_027226588.1	uncharacterized protein LOC113818583 [Penaeus vannamei]	86.54	2e-176	520	#N/A	#N/A
Mj-7129	#N/A	#N/A	#N/A	#N/A	#N/A	#N/A	#N/A
Mj-7130	#N/A	#N/A	#N/A	#N/A	#N/A	#N/A	#N/A
Mj-7132	ROT77918.1	ribosomal protein L15e [Penaeus vannamei]	95.1	3e-113	332	GO:0002181,GO:0003674,GO:0003676,GO:0003723,GO:0003735,GO:0005198,GO:0005488,GO:0005575,GO:0005622,GO:0005623,GO:0005737,GO:0005829,GO:0005840,GO:0006412,GO:0006518,GO:0006807,GO:0008150,GO:0008152,GO:0009058,GO:0009059,GO:0009987,GO:0010467,GO:0015934,GO:0019538,GO:0022625,GO:0022626,GO:0032991,GO:0034641,GO:0034645,GO:0043043,GO:0043170,GO:0043226,GO:0043228,GO:0043229,GO:0043232,GO:0043603,GO:…	J
Mj-714	ROT80629.1	Beta-parvin [Penaeus vannamei]	90.6	0	833	GO:0002009,GO:0002165,GO:0003674,GO:0003779,GO:0005488,GO:0005515,GO:0005575,GO:0005912,GO:0005924,GO:0005925,GO:0007275,GO:0007444,GO:0007472,GO:0007475,GO:0007476,GO:0007517,GO:0007552,GO:0007560,GO:0008092,GO:0008150,GO:0008587,GO:0009653,GO:0009791,GO:0009886,GO:0009887,GO:0009888,GO:0016203,GO:0030054,GO:0030055,GO:0032501,GO:0032502,GO:0035107,GO:0035114,GO:0035120,GO:0035220,GO:0035239,GO:…	Z
Mj-7152	XP_027239574.1	uncharacterized protein LOC113830567 [Penaeus vannamei]	65.71	7e-58	194	#N/A	#N/A
Mj-7156	ROT83472.1	putative ferritin light-chain subunit [Penaeus vannamei]	67.28	2e-98	296	#N/A	#N/A
Mj-7163	XP_027214689.1	THO complex subunit 4-like [Penaeus vannamei]	83.33	2e-93	299	#N/A	A
Mj-7169	XP_027218240.1	LOW QUALITY PROTEIN: zinc finger SWIM domain-containing protein 8-like [Penaeus vannamei]	96.53	0	3146	GO:0003008,GO:0007600,GO:0008150,GO:0019233,GO:0032501,GO:0050877	S
Mj-7183	XP_027235871.1	supervillin-like [Penaeus vannamei]	93.02	0	3754	GO:0003674,GO:0003779,GO:0005488,GO:0005515,GO:0008092	Z
Mj-7190	XP_027229675.1	dual oxidase maturation factor 1-like isoform X1 [Penaeus vannamei]	84.59	2e-176	521	#N/A	S
Mj-7196	ROT69199.1	alpha-I tubulin [Penaeus vannamei]	99.55	0	891	#N/A	Z
Mj-7202	XP_027238745.1	uncharacterized protein LOC113829772 [Penaeus vannamei]	47.62	4e-51	171	#N/A	#N/A
Mj-7203	AVG44186.1	crustin-like protein [Penaeus japonicus]	100	8e-41	141	#N/A	#N/A	AMPs and lysozyme-related
Mj-7205	#N/A	#N/A	#N/A	#N/A	#N/A	#N/A	#N/A
Mj-7211	XP_027217676.1	uncharacterized protein ZK1073.1-like [Penaeus vannamei]	99.13	0	713	#N/A	S
Mj-7213	#N/A	#N/A	#N/A	#N/A	#N/A	#N/A	#N/A
Mj-7218	#N/A	#N/A	#N/A	#N/A	#N/A	#N/A	#N/A
Mj-7220	#N/A	#N/A	#N/A	#N/A	#N/A	#N/A	#N/A
Mj-7227	#N/A	#N/A	#N/A	#N/A	#N/A	#N/A	#N/A
Mj-7232	XP_027229129.1	tropomyosin isoforms c/e isoform X14 [Penaeus vannamei]	98.07	0	552	GO:0000003,GO:0000578,GO:0000902,GO:0000904,GO:0003002,GO:0003006,GO:0003008,GO:0003012,GO:0003674,GO:0003779,GO:0005198,GO:0005488,GO:0005515,GO:0005575,GO:0005622,GO:0005623,GO:0005737,GO:0005856,GO:0005862,GO:0005865,GO:0006403,GO:0006936,GO:0006950,GO:0006996,GO:0007010,GO:0007015,GO:0007028,GO:0007275,GO:0007276,GO:0007281,GO:0007292,GO:0007308,GO:0007309,GO:0007314,GO:0007315,GO:0007316,GO:…	Z
Mj-7233	XP_027236205.1	phosphatidylinositol-binding clathrin assembly protein LAP-like isoform X11 [Penaeus vannamei]	97.48	0	994	GO:0003674,GO:0005488,GO:0005515,GO:0005543,GO:0005545,GO:0005575,GO:0005623,GO:0005905,GO:0006810,GO:0006897,GO:0006898,GO:0007154,GO:0007267,GO:0007268,GO:0007270,GO:0008150,GO:0008289,GO:0009314,GO:0009416,GO:0009453,GO:0009605,GO:0009628,GO:0009987,GO:0012505,GO:0016020,GO:0016192,GO:0023052,GO:0030100,GO:0030276,GO:0032879,GO:0035091,GO:0036465,GO:0040011,GO:0042330,GO:0042331,GO:0043167,GO:…	TU
Mj-7238	AEK78307.1	adenine nucleotide translocase 2 [Penaeus vannamei]	98.38	0	592	GO:0000003,GO:0000295,GO:0001508,GO:0003006,GO:0003254,GO:0003674,GO:0005215,GO:0005346,GO:0005347,GO:0005471,GO:0005575,GO:0005622,GO:0005623,GO:0005737,GO:0005739,GO:0005740,GO:0005743,GO:0006140,GO:0006810,GO:0006811,GO:0006820,GO:0006839,GO:0006855,GO:0006862,GO:0006873,GO:0006874,GO:0006875,GO:0006950,GO:0006979,GO:0006996,GO:0007005,GO:0007006,GO:0007154,GO:0007267,GO:0007268,GO:0007275,GO:…	C
Mj-7242	ROT61641.1	ribosomal protein S18 [Penaeus vannamei]	87.78	5e-52	165	GO:0002181,GO:0003674,GO:0003735,GO:0005198,GO:0005575,GO:0005622,GO:0005623,GO:0005634,GO:0005730,GO:0005737,GO:0005829,GO:0005840,GO:0006412,GO:0006518,GO:0006807,GO:0008150,GO:0008152,GO:0009058,GO:0009059,GO:0009987,GO:0010467,GO:0015935,GO:0019538,GO:0022613,GO:0022626,GO:0022627,GO:0031974,GO:0031981,GO:0032991,GO:0034641,GO:0034645,GO:0042254,GO:0043043,GO:0043170,GO:0043226,GO:0043227,GO:…	J
Mj-7243	ROT61641.1	ribosomal protein S18 [Penaeus vannamei]	99.24	5e-92	269	GO:0002181,GO:0003674,GO:0003735,GO:0005198,GO:0005575,GO:0005622,GO:0005623,GO:0005634,GO:0005730,GO:0005737,GO:0005829,GO:0005840,GO:0006412,GO:0006518,GO:0006807,GO:0008150,GO:0008152,GO:0009058,GO:0009059,GO:0009987,GO:0010467,GO:0015935,GO:0019538,GO:0022613,GO:0022626,GO:0022627,GO:0031974,GO:0031981,GO:0032991,GO:0034641,GO:0034645,GO:0042254,GO:0043043,GO:0043170,GO:0043226,GO:0043227,GO:…	J
Mj-7250	ROT69140.1	S25e ribosomal protein [Penaeus vannamei]	100	5e-50	160	GO:0002181,GO:0003674,GO:0003735,GO:0005198,GO:0005575,GO:0005622,GO:0005623,GO:0005737,GO:0005829,GO:0005840,GO:0006412,GO:0006518,GO:0006807,GO:0008150,GO:0008152,GO:0009058,GO:0009059,GO:0009987,GO:0010467,GO:0015935,GO:0019538,GO:0022626,GO:0022627,GO:0032991,GO:0034641,GO:0034645,GO:0043043,GO:0043170,GO:0043226,GO:0043228,GO:0043229,GO:0043232,GO:0043603,GO:0043604,GO:0044237,GO:0044238,GO:…	J
Mj-7265	XP_027236536.1	serine/threonine-protein phosphatase 6 regulatory subunit 3-like isoform X2 [Penaeus vannamei]	94.38	0	1637	GO:0001932,GO:0001933,GO:0008150,GO:0009892,GO:0009966,GO:0009968,GO:0010563,GO:0010605,GO:0010646,GO:0010648,GO:0019220,GO:0019222,GO:0023051,GO:0023057,GO:0031323,GO:0031324,GO:0031399,GO:0031400,GO:0032268,GO:0032269,GO:0032872,GO:0032873,GO:0042325,GO:0042326,GO:0043408,GO:0043409,GO:0045936,GO:0046328,GO:0046329,GO:0048519,GO:0048523,GO:0048583,GO:0048585,GO:0050789,GO:0050794,GO:0051171,GO:…	D
Mj-7267	#N/A	#N/A	#N/A	#N/A	#N/A	#N/A	#N/A
Mj-728	ROT66185.1	putative vacuolar protein sorting-associated protein 4B-like [Penaeus vannamei]	97.94	0	768	#N/A	O
Mj-7287	XP_027237912.1	acidic leucine-rich nuclear phosphoprotein 32 family member A-like [Penaeus vannamei]	96.86	8e-90	296	GO:0003674,GO:0005488,GO:0005515,GO:0005575,GO:0005622,GO:0005623,GO:0005634,GO:0005737,GO:0005783,GO:0005856,GO:0005875,GO:0006323,GO:0006325,GO:0006333,GO:0006334,GO:0006338,GO:0006810,GO:0006913,GO:0006996,GO:0007017,GO:0008017,GO:0008092,GO:0008150,GO:0009987,GO:0010941,GO:0012505,GO:0015630,GO:0015631,GO:0016043,GO:0022607,GO:0031497,GO:0032991,GO:0034622,GO:0034728,GO:0042393,GO:0042981,GO:…	D
Mj-7301	ROT61687.1	ribosomal protein L32 [Penaeus vannamei]	97.76	1e-93	272	GO:0002181,GO:0003674,GO:0003735,GO:0005198,GO:0005575,GO:0005622,GO:0005623,GO:0005634,GO:0005730,GO:0005737,GO:0005829,GO:0005840,GO:0006412,GO:0006518,GO:0006807,GO:0008150,GO:0008152,GO:0009058,GO:0009059,GO:0009987,GO:0010467,GO:0015934,GO:0019538,GO:0022625,GO:0022626,GO:0031974,GO:0031981,GO:0032991,GO:0034641,GO:0034645,GO:0043043,GO:0043170,GO:0043226,GO:0043227,GO:0043228,GO:0043229,GO:…	J
Mj-7304	XP_027237347.1	60S ribosomal protein L35a-like [Penaeus vannamei]	95.69	4e-77	229	GO:0002181,GO:0003674,GO:0003735,GO:0005198,GO:0005575,GO:0005622,GO:0005623,GO:0005737,GO:0005829,GO:0005840,GO:0006412,GO:0006518,GO:0006807,GO:0008150,GO:0008152,GO:0009058,GO:0009059,GO:0009987,GO:0010467,GO:0015934,GO:0019538,GO:0022613,GO:0022625,GO:0022626,GO:0032991,GO:0034641,GO:0034645,GO:0042254,GO:0042273,GO:0043043,GO:0043170,GO:0043226,GO:0043228,GO:0043229,GO:0043232,GO:0043603,GO:…	J
Mj-7306	ROT76246.1	putative ribosomal protein L19e [Penaeus vannamei]	100	6e-95	289	GO:0002181,GO:0003674,GO:0003676,GO:0003723,GO:0003735,GO:0005198,GO:0005488,GO:0005575,GO:0005622,GO:0005623,GO:0005737,GO:0005829,GO:0005840,GO:0006412,GO:0006518,GO:0006807,GO:0008150,GO:0008152,GO:0009058,GO:0009059,GO:0009987,GO:0010467,GO:0015934,GO:0019538,GO:0022625,GO:0022626,GO:0032991,GO:0034641,GO:0034645,GO:0043043,GO:0043170,GO:0043226,GO:0043228,GO:0043229,GO:0043232,GO:0043603,GO:…	J
Mj-733	ROT80781.1	putative caprin-1-like isoform X2 [Penaeus vannamei]	93.6	1e-160	503	GO:0003674,GO:0003676,GO:0003723,GO:0005488,GO:0005575,GO:0005622,GO:0005623,GO:0005737,GO:0007275,GO:0007346,GO:0007349,GO:0008150,GO:0009653,GO:0009794,GO:0032501,GO:0032502,GO:0032991,GO:0040008,GO:0044424,GO:0044464,GO:0045570,GO:0045571,GO:0045926,GO:0045995,GO:0046620,GO:0046621,GO:0048519,GO:0048638,GO:0048640,GO:0048646,GO:0048856,GO:0050789,GO:0050793,GO:0050794,GO:0051093,GO:0051239,GO:…	S
Mj-7374	#N/A	#N/A	#N/A	#N/A	#N/A	#N/A	#N/A
Mj-7515	XP_027232201.1	LOW QUALITY PROTEIN: angiotensin-converting enzyme-like [Penaeus vannamei]	91.85	0	1241	GO:0000003,GO:0002027,GO:0003006,GO:0003007,GO:0003674,GO:0003824,GO:0004175,GO:0004222,GO:0005488,GO:0005575,GO:0005576,GO:0005615,GO:0006508,GO:0006807,GO:0006996,GO:0006997,GO:0007275,GO:0007276,GO:0007281,GO:0007283,GO:0007286,GO:0007289,GO:0007291,GO:0007349,GO:0007507,GO:0007552,GO:0008016,GO:0008150,GO:0008152,GO:0008233,GO:0008237,GO:0008238,GO:0008241,GO:0008270,GO:0009605,GO:0009607,GO:…	O
Mj-7520	ROT63141.1	hemocyte transglutaminase [Penaeus vannamei]	90	6e-14	69.3	#N/A	#N/A	clotting-related
Mj-7547	XP_027210866.1	CKLF-like MARVEL transmembrane domain-containing protein 4 isoform X1 [Penaeus vannamei]	84.26	1e-96	286	GO:0005575,GO:0016020,GO:0016021,GO:0031224,GO:0044425	V
Mj-7564	ROT81863.1	LIM domain-binding protein 3 [Penaeus vannamei]	85.42	5e-107	351	#N/A	TZ
Mj-7565	XP_027218317.1	tetraspanin-1-like [Penaeus vannamei]	97.03	6e-150	446	GO:0005575,GO:0005623,GO:0005886,GO:0005887,GO:0007154,GO:0007165,GO:0007166,GO:0008150,GO:0009987,GO:0016020,GO:0016021,GO:0023052,GO:0031224,GO:0031226,GO:0044425,GO:0044459,GO:0044464,GO:0050789,GO:0050794,GO:0050896,GO:0051716,GO:0065007,GO:0071944	S
Mj-7567	ROT61642.1	Ras-like enriched in brain [Penaeus vannamei]	99.45	4e-122	375	#N/A	S
Mj-7568	#N/A	#N/A	#N/A	#N/A	#N/A	#N/A	#N/A
Mj-7569	ROT66879.1	putative ubiquitin-conjugating enzyme E2 G1 [Penaeus vannamei]	98.68	4e-106	314	GO:0000209,GO:0003674,GO:0003824,GO:0004842,GO:0005488,GO:0005515,GO:0005575,GO:0005622,GO:0005623,GO:0005737,GO:0006464,GO:0006508,GO:0006511,GO:0006807,GO:0008150,GO:0008152,GO:0009056,GO:0009057,GO:0009987,GO:0016567,GO:0016740,GO:0019538,GO:0019787,GO:0019899,GO:0019941,GO:0030163,GO:0031625,GO:0032446,GO:0036211,GO:0043170,GO:0043412,GO:0043632,GO:0044237,GO:0044238,GO:0044248,GO:0044257,GO:…	O
Mj-7581	XP_027211549.1	paired amphipathic helix protein Sin3a-like isoform X1 [Penaeus vannamei]	98.69	0	2529	GO:0000118,GO:0000122,GO:0000228,GO:0000785,GO:0000790,GO:0000791,GO:0001667,GO:0002164,GO:0002682,GO:0003674,GO:0003682,GO:0003712,GO:0005488,GO:0005515,GO:0005575,GO:0005622,GO:0005623,GO:0005634,GO:0005654,GO:0005694,GO:0005700,GO:0006325,GO:0006355,GO:0006357,GO:0006464,GO:0006476,GO:0006807,GO:0006928,GO:0006996,GO:0007275,GO:0007346,GO:0007399,GO:0007422,GO:0007444,GO:0007525,GO:0007526,GO:…	B
Mj-7584	XP_027219768.1	kalirin-like [Penaeus vannamei]	99.02	0	3274	GO:0000902,GO:0000904,GO:0002009,GO:0002165,GO:0003674,GO:0005085,GO:0005088,GO:0005089,GO:0005488,GO:0005515,GO:0005575,GO:0005622,GO:0005623,GO:0005886,GO:0006928,GO:0006935,GO:0006996,GO:0007010,GO:0007154,GO:0007275,GO:0007399,GO:0007409,GO:0007411,GO:0007412,GO:0007417,GO:0007420,GO:0007422,GO:0007444,GO:0007478,GO:0007480,GO:0007552,GO:0007560,GO:0008150,GO:0008582,GO:0009605,GO:0009653,GO:…	T
Mj-7595	ROT69409.1	ribosomal protein L9 [Penaeus vannamei]	95.31	4e-133	378	GO:0002181,GO:0003674,GO:0003676,GO:0003723,GO:0003735,GO:0005198,GO:0005488,GO:0005575,GO:0005622,GO:0005623,GO:0005737,GO:0005829,GO:0005840,GO:0006412,GO:0006518,GO:0006807,GO:0008150,GO:0008152,GO:0009058,GO:0009059,GO:0009987,GO:0010467,GO:0015934,GO:0019538,GO:0022625,GO:0022626,GO:0032991,GO:0034641,GO:0034645,GO:0043043,GO:0043170,GO:0043226,GO:0043228,GO:0043229,GO:0043232,GO:0043603,GO:…	J
Mj-7601	ROT72381.1	ribosomal protein rpl34 [Penaeus vannamei]	96.91	8e-62	190	GO:0002181,GO:0003674,GO:0003676,GO:0003723,GO:0003735,GO:0005198,GO:0005488,GO:0005515,GO:0005575,GO:0005622,GO:0005623,GO:0005737,GO:0005829,GO:0005840,GO:0006412,GO:0006518,GO:0006807,GO:0008092,GO:0008150,GO:0008152,GO:0009058,GO:0009059,GO:0009987,GO:0010467,GO:0015934,GO:0017022,GO:0019538,GO:0022613,GO:0022625,GO:0022626,GO:0032991,GO:0034641,GO:0034645,GO:0042254,GO:0043043,GO:0043170,GO:…	J
Mj-7612	ROT71534.1	S-phase kinase-associated protein 1 [Penaeus vannamei]	99.38	3e-81	254	GO:0000151,GO:0000226,GO:0001932,GO:0001933,GO:0003674,GO:0005488,GO:0005515,GO:0005575,GO:0005622,GO:0005623,GO:0006139,GO:0006259,GO:0006260,GO:0006261,GO:0006323,GO:0006508,GO:0006511,GO:0006725,GO:0006807,GO:0006996,GO:0007010,GO:0007017,GO:0007049,GO:0007098,GO:0007275,GO:0007346,GO:0007399,GO:0008150,GO:0008152,GO:0008582,GO:0009056,GO:0009057,GO:0009058,GO:0009059,GO:0009892,GO:0009893,GO:…	O
Mj-7615	XP_027208735.1	cadherin-23-like isoform X1 [Penaeus vannamei]	96.42	0	2138	GO:0003674,GO:0005488,GO:0005509,GO:0005575,GO:0005623,GO:0005886,GO:0005887,GO:0007155,GO:0007275,GO:0007424,GO:0008150,GO:0016020,GO:0016021,GO:0016339,GO:0022610,GO:0031224,GO:0031226,GO:0032501,GO:0032502,GO:0043167,GO:0043169,GO:0044331,GO:0044425,GO:0044459,GO:0044464,GO:0046872,GO:0048731,GO:0048856,GO:0060541,GO:0071944,GO:0098609,GO:0098742	S
Mj-7623	XP_027210998.1	60S ribosomal protein L23 [Penaeus vannamei]	99.29	3e-95	278	GO:0000122,GO:0000184,GO:0000956,GO:0001221,GO:0001223,GO:0003674,GO:0003676,GO:0003723,GO:0003735,GO:0004857,GO:0005198,GO:0005488,GO:0005515,GO:0005575,GO:0005622,GO:0005623,GO:0005634,GO:0005654,GO:0005730,GO:0005737,GO:0005783,GO:0005789,GO:0005791,GO:0005829,GO:0005840,GO:0006139,GO:0006355,GO:0006357,GO:0006401,GO:0006402,GO:0006412,GO:0006413,GO:0006518,GO:0006605,GO:0006606,GO:0006610,GO:…	J
Mj-7626	XP_027234856.1	protein enabled-like isoform X1 [Penaeus vannamei]	99.2	0	635	GO:0000003,GO:0000902,GO:0000904,GO:0001654,GO:0001667,GO:0001700,GO:0002009,GO:0002064,GO:0002065,GO:0002066,GO:0003002,GO:0003006,GO:0003382,GO:0003674,GO:0003779,GO:0005488,GO:0005515,GO:0005575,GO:0005622,GO:0005623,GO:0005737,GO:0005911,GO:0005912,GO:0006810,GO:0006928,GO:0006935,GO:0006996,GO:0007010,GO:0007015,GO:0007275,GO:0007276,GO:0007281,GO:0007292,GO:0007297,GO:0007298,GO:0007300,GO:…	T
Mj-7628	ROT73203.1	hypothetical protein C7M84_008367 [Penaeus vannamei]	97.9	0	681	#N/A	S
Mj-7635	AQT40602.1	GSK3beta [Penaeus vannamei]	100	0	800	GO:0000003,GO:0000226,GO:0000280,GO:0000902,GO:0000904,GO:0001700,GO:0001932,GO:0001933,GO:0002009,GO:0002064,GO:0002065,GO:0002066,GO:0002164,GO:0002165,GO:0002168,GO:0002682,GO:0003002,GO:0003006,GO:0003008,GO:0003382,GO:0003674,GO:0003824,GO:0004672,GO:0004674,GO:0005488,GO:0005515,GO:0005575,GO:0005576,GO:0005622,GO:0005623,GO:0005634,GO:0005654,GO:0005737,GO:0005813,GO:0005815,GO:0005819,GO:…	G
Mj-7643	XP_027238100.1	lysine-specific demethylase 3A-like [Penaeus vannamei]	95.26	0	2618	GO:0000785,GO:0000976,GO:0001067,GO:0003674,GO:0003676,GO:0003677,GO:0003682,GO:0003690,GO:0003824,GO:0005488,GO:0005575,GO:0005622,GO:0005623,GO:0005634,GO:0005694,GO:0006325,GO:0006355,GO:0006464,GO:0006482,GO:0006807,GO:0006996,GO:0008150,GO:0008152,GO:0008214,GO:0009889,GO:0009987,GO:0010468,GO:0010556,GO:0010638,GO:0016043,GO:0016569,GO:0016570,GO:0016577,GO:0019219,GO:0019222,GO:0019538,GO:…	K
Mj-7644	XP_027226769.1	RNA-binding protein 1-like isoform X1 [Penaeus vannamei]	100	3e-62	211	GO:0000375,GO:0000377,GO:0000381,GO:0000398,GO:0001178,GO:0003674,GO:0003676,GO:0003723,GO:0003729,GO:0005488,GO:0006139,GO:0006355,GO:0006357,GO:0006396,GO:0006397,GO:0006725,GO:0006807,GO:0008150,GO:0008152,GO:0008380,GO:0009889,GO:0009987,GO:0010467,GO:0010468,GO:0010556,GO:0016070,GO:0016071,GO:0019219,GO:0019222,GO:0031323,GO:0031326,GO:0031440,GO:0034641,GO:0043170,GO:0043254,GO:0043484,GO:…	A
Mj-765	#N/A	#N/A	#N/A	#N/A	#N/A	#N/A	#N/A
Mj-772	XP_027206824.1	uncharacterized protein LOC113800278 isoform X2 [Penaeus vannamei]	97.47	8e-89	287	#N/A	#N/A
Mj-7753	ROT68008.1	hypothetical protein C7M84_013883 [Penaeus vannamei]	97.73	6e-46	150	#N/A	S
Mj-7786	XP_027223225.1	excitatory amino acid transporter 3-like isoform X1 [Penaeus vannamei]	93.47	0	883	#N/A	P
Mj-7807	AFW03834.1	cation-dependent mannose-6-phosphate receptor, partial [Penaeus japonicus]	100	6e-161	464	GO:0000139,GO:0000323,GO:0002790,GO:0003674,GO:0004888,GO:0005488,GO:0005575,GO:0005622,GO:0005623,GO:0005737,GO:0005764,GO:0005765,GO:0005768,GO:0005770,GO:0005773,GO:0005774,GO:0005794,GO:0005802,GO:0005886,GO:0005887,GO:0006810,GO:0006886,GO:0006897,GO:0006898,GO:0007034,GO:0007041,GO:0007154,GO:0007165,GO:0008104,GO:0008150,GO:0008333,GO:0009306,GO:0009987,GO:0012505,GO:0012506,GO:0015031,GO:…	T
Mj-7853	XP_027209337.1	26S proteasome regulatory subunit 7 [Penaeus vannamei]	99.31	0	794	#N/A	O
Mj-7864	XP_027212241.1	acidic proline-rich protein PRP25-like [Penaeus vannamei]	80.91	3e-54	189	GO:0000823,GO:0003674,GO:0003824,GO:0005575,GO:0005622,GO:0005623,GO:0005634,GO:0005654,GO:0006066,GO:0006793,GO:0006796,GO:0007275,GO:0007444,GO:0008150,GO:0008152,GO:0008440,GO:0009058,GO:0009888,GO:0009987,GO:0016301,GO:0016310,GO:0016740,GO:0016772,GO:0016773,GO:0019637,GO:0019751,GO:0031974,GO:0031981,GO:0032501,GO:0032502,GO:0032958,GO:0035295,GO:0043226,GO:0043227,GO:0043229,GO:0043231,GO:…	G
Mj-7876	XP_027239603.1	60S ribosomal protein L31-like [Penaeus vannamei]	97.58	8e-69	208	GO:0002181,GO:0003674,GO:0003735,GO:0005198,GO:0005575,GO:0005622,GO:0005623,GO:0005737,GO:0005829,GO:0005840,GO:0006412,GO:0006518,GO:0006807,GO:0008150,GO:0008152,GO:0009058,GO:0009059,GO:0009987,GO:0010467,GO:0015934,GO:0019538,GO:0022625,GO:0022626,GO:0032991,GO:0034641,GO:0034645,GO:0043043,GO:0043170,GO:0043226,GO:0043228,GO:0043229,GO:0043232,GO:0043603,GO:0043604,GO:0044237,GO:0044238,GO:…	J
Mj-7880	ROT80902.1	14-3-3-like protein [Penaeus vannamei]	100	3e-175	506	GO:0000003,GO:0000226,GO:0000278,GO:0001709,GO:0001932,GO:0001933,GO:0003006,GO:0003008,GO:0003674,GO:0004857,GO:0004860,GO:0005488,GO:0005515,GO:0005575,GO:0005576,GO:0005622,GO:0005623,GO:0005634,GO:0006457,GO:0006469,GO:0006996,GO:0007010,GO:0007017,GO:0007049,GO:0007059,GO:0007163,GO:0007275,GO:0007276,GO:0007281,GO:0007292,GO:0007293,GO:0007294,GO:0007308,GO:0007309,GO:0007389,GO:0007610,GO:…	O
Mj-7881	XP_027210368.1	41701 protein zeta-like [Penaeus vannamei]	100	8e-27	112	#N/A	#N/A
Mj-7888	ROT80636.1	ribosomal protein L24 [Penaeus vannamei]	93.21	2e-68	211	GO:0000027,GO:0002181,GO:0003674,GO:0003676,GO:0003723,GO:0003735,GO:0005198,GO:0005488,GO:0005575,GO:0005622,GO:0005623,GO:0005737,GO:0005829,GO:0005840,GO:0006412,GO:0006518,GO:0006807,GO:0006996,GO:0008150,GO:0008152,GO:0009058,GO:0009059,GO:0009987,GO:0010467,GO:0015934,GO:0016043,GO:0019538,GO:0022607,GO:0022613,GO:0022618,GO:0022625,GO:0022626,GO:0032991,GO:0034622,GO:0034641,GO:0034645,GO:…	J
Mj-791	#N/A	#N/A	#N/A	#N/A	#N/A	#N/A	#N/A
Mj-8	XP_027232497.1	E3 ubiquitin-protein ligase HUWE1-like [Penaeus vannamei]	96.3	0	4757	GO:0003674,GO:0003824,GO:0004842,GO:0005575,GO:0005622,GO:0005623,GO:0005634,GO:0005737,GO:0006403,GO:0006464,GO:0006807,GO:0006810,GO:0008150,GO:0008152,GO:0009987,GO:0015931,GO:0016567,GO:0016740,GO:0019538,GO:0019787,GO:0032446,GO:0033036,GO:0033227,GO:0036211,GO:0043170,GO:0043226,GO:0043227,GO:0043229,GO:0043231,GO:0043412,GO:0044237,GO:0044238,GO:0044260,GO:0044267,GO:0044424,GO:0044464,GO:…	O
Mj-8044	ROT83025.1	hypothetical protein C7M84_023806 [Penaeus vannamei]	95.68	0	602	GO:0002181,GO:0003674,GO:0003676,GO:0003723,GO:0003735,GO:0005198,GO:0005488,GO:0005575,GO:0005622,GO:0005623,GO:0005737,GO:0005829,GO:0005840,GO:0006412,GO:0006518,GO:0006807,GO:0008150,GO:0008152,GO:0009058,GO:0009059,GO:0009987,GO:0010467,GO:0015934,GO:0019538,GO:0022625,GO:0022626,GO:0032991,GO:0034641,GO:0034645,GO:0043043,GO:0043170,GO:0043226,GO:0043228,GO:0043229,GO:0043232,GO:0043603,GO:…	J
Mj-8087	#N/A	#N/A	#N/A	#N/A	#N/A	#N/A	#N/A
Mj-8106	XP_027210773.1	adenomatous polyposis coli protein-like isoform X1 [Penaeus vannamei]	96.94	0	1310	#N/A	TZ
Mj-8114	ROT65943.1	hypothetical protein C7M84_016070 [Penaeus vannamei]	43.82	2e-52	187	#N/A	#N/A
Mj-8125	XP_027209346.1	protein-methionine sulfoxide oxidase mical3a-like [Penaeus vannamei]	91.36	0	3825	#N/A	Z
Mj-8129	XP_027212853.1	uncharacterized protein LOC113805964 [Penaeus vannamei]	87.17	0	607	GO:0001932,GO:0001933,GO:0005575,GO:0005622,GO:0005623,GO:0005634,GO:0005654,GO:0006355,GO:0006357,GO:0008150,GO:0009889,GO:0009891,GO:0009892,GO:0009893,GO:0010468,GO:0010556,GO:0010557,GO:0010563,GO:0010604,GO:0010605,GO:0010628,GO:0019219,GO:0019220,GO:0019222,GO:0031323,GO:0031324,GO:0031325,GO:0031326,GO:0031328,GO:0031399,GO:0031400,GO:0031974,GO:0031981,GO:0032268,GO:0032269,GO:0042325,GO:…	S
Mj-8143	ROT70841.1	hypothetical protein C7M84_010860 [Penaeus vannamei]	96.01	0	603	#N/A	#N/A
Mj-8160	AUB30130.1	cytoplasmic-type actin 2 [Penaeus vannamei]	99.2	0	771	GO:0000228,GO:0000278,GO:0000281,GO:0000785,GO:0000790,GO:0000910,GO:0003674,GO:0005198,GO:0005200,GO:0005575,GO:0005622,GO:0005623,GO:0005634,GO:0005694,GO:0005856,GO:0005884,GO:0006996,GO:0007010,GO:0007049,GO:0008150,GO:0009987,GO:0015629,GO:0016043,GO:0022402,GO:0031974,GO:0031981,GO:0032991,GO:0035060,GO:0043226,GO:0043227,GO:0043228,GO:0043229,GO:0043231,GO:0043232,GO:0043233,GO:0044422,GO:…	Z
Mj-8171	XP_027215768.1	mid1-interacting protein 1-like [Penaeus vannamei]	93.87	1e-90	289	GO:0003674,GO:0005488,GO:0005515,GO:0008092,GO:0017022	S
Mj-8173	XP_027231830.1	uncharacterized protein LOC113823401 [Penaeus vannamei]	47.66	0	653	#N/A	T
Mj-8180	ROT74290.1	60S ribosomal protein L21 [Penaeus vannamei]	94.48	6e-110	317	GO:0002181,GO:0003674,GO:0003735,GO:0005198,GO:0005575,GO:0005622,GO:0005623,GO:0005737,GO:0005829,GO:0005840,GO:0006412,GO:0006518,GO:0006807,GO:0008150,GO:0008152,GO:0009058,GO:0009059,GO:0009987,GO:0010467,GO:0015934,GO:0019538,GO:0022625,GO:0022626,GO:0032991,GO:0034641,GO:0034645,GO:0043043,GO:0043170,GO:0043226,GO:0043228,GO:0043229,GO:0043232,GO:0043603,GO:0043604,GO:0044237,GO:0044238,GO:…	J
Mj-8204	XP_027238282.1	40S ribosomal protein S23 [Penaeus vannamei]	100	6e-97	291	GO:0002181,GO:0003674,GO:0003735,GO:0005198,GO:0005575,GO:0005622,GO:0005623,GO:0005737,GO:0005829,GO:0005840,GO:0005844,GO:0006412,GO:0006518,GO:0006807,GO:0008150,GO:0008152,GO:0009058,GO:0009059,GO:0009987,GO:0010467,GO:0015935,GO:0019538,GO:0022626,GO:0022627,GO:0032991,GO:0034641,GO:0034645,GO:0042788,GO:0043043,GO:0043170,GO:0043226,GO:0043228,GO:0043229,GO:0043232,GO:0043603,GO:0043604,GO:…	J
Mj-8215	#N/A	#N/A	#N/A	#N/A	#N/A	#N/A	#N/A
Mj-823	XP_027212262.1	uncharacterized protein LOC113805459 [Penaeus vannamei]	43.54	1e-86	289	#N/A	#N/A
Mj-826	XP_027217240.1	vegetative cell wall protein gp1-like [Penaeus vannamei]	95.69	1e-121	396	GO:0005575,GO:0005622,GO:0005623,GO:0005737,GO:0005783,GO:0005790,GO:0006996,GO:0007029,GO:0008150,GO:0009987,GO:0010256,GO:0012505,GO:0016043,GO:0030424,GO:0030426,GO:0030427,GO:0033267,GO:0042995,GO:0043005,GO:0043226,GO:0043227,GO:0043229,GO:0043231,GO:0044295,GO:0044424,GO:0044444,GO:0044463,GO:0044464,GO:0045169,GO:0061024,GO:0071786,GO:0071840,GO:0090158,GO:0097458,GO:0120025,GO:0120038,GO:…	U
Mj-8282	#N/A	#N/A	#N/A	#N/A	#N/A	#N/A	#N/A
Mj-8290	XP_027219152.1	piggyBac transposable element-derived protein 4-like [Penaeus vannamei]	52.38	9e-59	169	#N/A	#N/A
Mj-838	XP_027220541.1	eukaryotic peptide chain release factor GTP-binding subunit ERF3A-like [Penaeus vannamei]	98.11	0	914	GO:0000166,GO:0001882,GO:0001883,GO:0002181,GO:0002184,GO:0003674,GO:0003676,GO:0003723,GO:0003747,GO:0003824,GO:0003924,GO:0005488,GO:0005525,GO:0005575,GO:0005622,GO:0005623,GO:0005737,GO:0005829,GO:0006412,GO:0006415,GO:0006518,GO:0006807,GO:0008079,GO:0008135,GO:0008150,GO:0008152,GO:0009058,GO:0009059,GO:0009987,GO:0010467,GO:0016043,GO:0016462,GO:0016787,GO:0016817,GO:0016818,GO:0017076,GO:…	J
Mj-8382	ROT67400.1	putative protein unc-45-like B [Penaeus vannamei]	95.58	0	1835	GO:0006457,GO:0006950,GO:0006996,GO:0007010,GO:0007525,GO:0008150,GO:0009266,GO:0009408,GO:0009628,GO:0009987,GO:0016043,GO:0022607,GO:0030029,GO:0030036,GO:0031033,GO:0031034,GO:0032502,GO:0033554,GO:0034605,GO:0034622,GO:0043933,GO:0044085,GO:0048856,GO:0050896,GO:0051716,GO:0061061,GO:0061077,GO:0065003,GO:0071840	DO
Mj-8390	ROT68920.1	ribosomal protein S7 [Penaeus vannamei]	99	1e-143	405	GO:0002181,GO:0003674,GO:0003735,GO:0005198,GO:0005575,GO:0005622,GO:0005623,GO:0005737,GO:0005829,GO:0005840,GO:0006139,GO:0006364,GO:0006396,GO:0006412,GO:0006518,GO:0006725,GO:0006807,GO:0008150,GO:0008152,GO:0009058,GO:0009059,GO:0009987,GO:0010467,GO:0015935,GO:0016070,GO:0016072,GO:0019538,GO:0022613,GO:0022626,GO:0022627,GO:0030684,GO:0030686,GO:0032040,GO:0032991,GO:0034470,GO:0034641,GO:…	J
Mj-8395	XP_027229383.1	elongation factor 2-like isoform X2 [Penaeus vannamei]	97.87	0	1638	GO:0003674,GO:0003676,GO:0003723,GO:0003746,GO:0005488,GO:0005575,GO:0005622,GO:0005623,GO:0005737,GO:0005829,GO:0006412,GO:0006414,GO:0006518,GO:0006807,GO:0008135,GO:0008150,GO:0008152,GO:0009058,GO:0009059,GO:0009987,GO:0010467,GO:0019538,GO:0034641,GO:0034645,GO:0043043,GO:0043170,GO:0043603,GO:0043604,GO:0044237,GO:0044238,GO:0044249,GO:0044260,GO:0044267,GO:0044271,GO:0044424,GO:0044444,GO:…	J
Mj-8411	#N/A	#N/A	#N/A	#N/A	#N/A	#N/A	#N/A
Mj-8418	XP_027238626.1	glycoprotein-N-acetylgalactosamine 3-beta-galactosyltransferase 1-like [Penaeus vannamei]	94.89	0	758	GO:0000003,GO:0002682,GO:0002683,GO:0003674,GO:0003824,GO:0005575,GO:0005622,GO:0005623,GO:0005737,GO:0005794,GO:0005795,GO:0005797,GO:0006464,GO:0006486,GO:0006493,GO:0006629,GO:0006643,GO:0006664,GO:0006807,GO:0007275,GO:0007399,GO:0007417,GO:0007528,GO:0008150,GO:0008152,GO:0008378,GO:0008610,GO:0009058,GO:0009059,GO:0009100,GO:0009101,GO:0009247,GO:0009653,GO:0009987,GO:0012505,GO:0016020,GO:…	G
Mj-8419	XP_027236734.1	uncharacterized protein LOC113827978 isoform X1 [Penaeus vannamei]	68.29	2e-53	189	#N/A	#N/A
Mj-842	ADQ43367.1	HMGBb [Penaeus vannamei]	100	6e-123	382	#N/A	K
Mj-8506	XP_027218240.1	LOW QUALITY PROTEIN: zinc finger SWIM domain-containing protein 8-like [Penaeus vannamei]	43.3	4e-19	87.8	#N/A	S
Mj-8571	ROT85771.1	ribosomal protein L11 [Penaeus vannamei]	99.44	3e-129	367	GO:0000027,GO:0002181,GO:0003674,GO:0003676,GO:0003723,GO:0003735,GO:0005198,GO:0005488,GO:0005515,GO:0005575,GO:0005622,GO:0005623,GO:0005634,GO:0005730,GO:0005737,GO:0005829,GO:0005840,GO:0006412,GO:0006518,GO:0006807,GO:0006996,GO:0008150,GO:0008152,GO:0009058,GO:0009059,GO:0009987,GO:0010467,GO:0015934,GO:0016043,GO:0019538,GO:0022607,GO:0022613,GO:0022618,GO:0022625,GO:0022626,GO:0031974,GO:…	J
Mj-8572	#N/A	#N/A	#N/A	#N/A	#N/A	#N/A	#N/A
Mj-8587	ROT82954.1	putative protein transport protein Sec61 subunit gamma isoform X1 [Penaeus vannamei]	97.14	3e-30	108	#N/A	U
Mj-8589	XP_027212613.1	serine proteinase stubble-like [Penaeus vannamei]	80	1e-154	468	#N/A	O
Mj-8609	#N/A	#N/A	#N/A	#N/A	#N/A	#N/A	#N/A
Mj-8661	XP_027212328.1	cingulin-like protein 1 isoform X3 [Penaeus vannamei]	86.67	0	1503	#N/A	#N/A
Mj-8668	XP_027234143.1	eukaryotic translation initiation factor 5B-like [Penaeus vannamei]	65.56	6e-32	126	#N/A	#N/A
Mj-8719	XP_027209228.1	(E3-independent) E2 ubiquitin-conjugating enzyme-like [Penaeus vannamei]	93.7	0	2518	GO:0003674,GO:0003824,GO:0004842,GO:0005488,GO:0005515,GO:0005575,GO:0005622,GO:0005623,GO:0005737,GO:0006464,GO:0006513,GO:0006807,GO:0008150,GO:0008152,GO:0009987,GO:0016567,GO:0016740,GO:0019538,GO:0019787,GO:0019899,GO:0031625,GO:0032446,GO:0036211,GO:0043170,GO:0043412,GO:0044237,GO:0044238,GO:0044260,GO:0044267,GO:0044389,GO:0044424,GO:0044464,GO:0061630,GO:0061659,GO:0070647,GO:0071704,GO:…	O
Mj-873	#N/A	#N/A	#N/A	#N/A	#N/A	#N/A	#N/A
Mj-8766	ROT65579.1	hypothetical protein C7M84_016442 [Penaeus vannamei]	77.45	1e-46	155	#N/A	#N/A
Mj-8768	XP_027211784.1	serine/threonine-protein kinase stk11-like [Penaeus vannamei]	98.04	0	822	GO:0000003,GO:0000226,GO:0000278,GO:0000578,GO:0001700,GO:0001932,GO:0001934,GO:0002009,GO:0002064,GO:0002065,GO:0002066,GO:0003002,GO:0003006,GO:0003674,GO:0003824,GO:0004672,GO:0004674,GO:0005488,GO:0005515,GO:0005575,GO:0005622,GO:0005623,GO:0005634,GO:0005737,GO:0005768,GO:0005938,GO:0006403,GO:0006464,GO:0006468,GO:0006793,GO:0006796,GO:0006807,GO:0006996,GO:0007010,GO:0007017,GO:0007028,GO:…	T
Mj-8789	XP_027229841.1	endoribonuclease ZC3H12A-like [Penaeus vannamei]	91.41	0	1189	#N/A	S
Mj-8797	ROT73514.1	putative E3 ubiquitin ligase [Penaeus vannamei]	100	8e-124	383	#N/A	#N/A
Mj-880	XP_027215562.1	lysosome-associated membrane glycoprotein 1-like [Penaeus vannamei]	88.05	5e-122	386	GO:0000323,GO:0005575,GO:0005622,GO:0005623,GO:0005737,GO:0005764,GO:0005773,GO:0043226,GO:0043227,GO:0043229,GO:0043231,GO:0044424,GO:0044444,GO:0044464	U
Mj-8815	XP_027239156.1	ferritin subunit-like [Penaeus vannamei]	67.65	4e-106	322	GO:0000041,GO:0003674,GO:0005488,GO:0005506,GO:0005575,GO:0005576,GO:0005622,GO:0005623,GO:0005737,GO:0005794,GO:0006810,GO:0006811,GO:0006812,GO:0006826,GO:0006873,GO:0006875,GO:0006879,GO:0006880,GO:0007275,GO:0008043,GO:0008150,GO:0008198,GO:0008283,GO:0009605,GO:0009607,GO:0009620,GO:0009636,GO:0009791,GO:0009987,GO:0010035,GO:0010038,GO:0010039,GO:0012505,GO:0019725,GO:0030001,GO:0030003,GO:…	P
Mj-8817	#N/A	#N/A	#N/A	#N/A	#N/A	#N/A	#N/A
Mj-8819	XP_027217562.1	40S ribosomal protein S14 [Penaeus vannamei]	100	3e-86	256	GO:0000028,GO:0000462,GO:0002181,GO:0003674,GO:0003676,GO:0003723,GO:0003729,GO:0003735,GO:0005198,GO:0005488,GO:0005575,GO:0005622,GO:0005623,GO:0005737,GO:0005829,GO:0005840,GO:0006139,GO:0006364,GO:0006396,GO:0006412,GO:0006518,GO:0006725,GO:0006807,GO:0006996,GO:0008150,GO:0008152,GO:0009058,GO:0009059,GO:0009987,GO:0010467,GO:0015935,GO:0016043,GO:0016070,GO:0016072,GO:0019538,GO:0019843,GO:…	J
Mj-8824	#N/A	#N/A	#N/A	#N/A	#N/A	#N/A	#N/A
Mj-8846	XP_027218753.1	40S ribosomal protein S11-like isoform X2 [Penaeus vannamei]	96.08	1e-92	272	#N/A	J
Mj-887	XP_027237072.1	tetraspanning orphan receptor-like isoform X3 [Penaeus vannamei]	97.19	0	805	#N/A	S
Mj-897	XP_027212137.1	uncharacterized protein LOC113805345 [Penaeus vannamei]	73.32	0	881	#N/A	S
Mj-8972	XP_027208341.1	uncharacterized protein LOC113802078 isoform X1 [Penaeus vannamei]	91.83	0	978	GO:0000003,GO:0001775,GO:0007338,GO:0007343,GO:0008150,GO:0009566,GO:0009987,GO:0019953,GO:0022414,GO:0044703,GO:0051704	L
Mj-8994	ROT84158.1	ribosomal protein P0 [Penaeus vannamei]	96.65	0	545	GO:0002181,GO:0003674,GO:0003735,GO:0003824,GO:0003906,GO:0004518,GO:0004519,GO:0004520,GO:0004536,GO:0005198,GO:0005575,GO:0005622,GO:0005623,GO:0005737,GO:0005829,GO:0005840,GO:0006139,GO:0006259,GO:0006412,GO:0006518,GO:0006725,GO:0006807,GO:0008150,GO:0008152,GO:0009058,GO:0009059,GO:0009987,GO:0010467,GO:0015934,GO:0016787,GO:0016788,GO:0016888,GO:0016893,GO:0019538,GO:0022625,GO:0022626,GO:…	J
Mj-8998	ROT73884.1	putative neurofilament heavy polypeptide [Penaeus vannamei]	93.13	9e-78	251	GO:0000027,GO:0002181,GO:0003674,GO:0003676,GO:0003723,GO:0003735,GO:0005198,GO:0005488,GO:0005575,GO:0005622,GO:0005623,GO:0005737,GO:0005829,GO:0005840,GO:0006412,GO:0006518,GO:0006807,GO:0006996,GO:0008150,GO:0008152,GO:0009058,GO:0009059,GO:0009987,GO:0010467,GO:0015934,GO:0016043,GO:0019538,GO:0022607,GO:0022613,GO:0022618,GO:0022625,GO:0022626,GO:0032991,GO:0034622,GO:0034641,GO:0034645,GO:…	J
Mj-9001	XP_027236589.1	LOW QUALITY PROTEIN: serine/threonine-protein kinase Tao-like [Penaeus vannamei]	97.2	0	1515	#N/A	T
Mj-902	XP_027238969.1	sprouty-related, EVH1 domain-containing protein 2-like [Penaeus vannamei]	93.14	0	671	#N/A	T
Mj-9024	XP_027212255.1	adenylyl cyclase-associated protein 1-like isoform X3 [Penaeus vannamei]	89.78	0	902	GO:0000003,GO:0000226,GO:0000323,GO:0000902,GO:0000904,GO:0001654,GO:0001667,GO:0001745,GO:0001751,GO:0001754,GO:0001775,GO:0002252,GO:0002263,GO:0002274,GO:0002275,GO:0002283,GO:0002366,GO:0002376,GO:0002443,GO:0002444,GO:0002446,GO:0003002,GO:0003006,GO:0003674,GO:0003779,GO:0005488,GO:0005515,GO:0005575,GO:0005576,GO:0005622,GO:0005623,GO:0005737,GO:0005764,GO:0005766,GO:0005773,GO:0005775,GO:…	TZ
Mj-9026	ROT78483.1	Sarcolemmal membrane-associated protein [Penaeus vannamei]	94.91	0	1466	GO:0003674,GO:0005488,GO:0005515,GO:0005575,GO:0008150,GO:0009966,GO:0009968,GO:0010646,GO:0010648,GO:0019899,GO:0019900,GO:0019901,GO:0023051,GO:0023057,GO:0032991,GO:0035330,GO:0035331,GO:0048519,GO:0048523,GO:0048583,GO:0048585,GO:0050789,GO:0050794,GO:0065007,GO:0090443,GO:1902531,GO:1902532	T
Mj-9060	#N/A	#N/A	#N/A	#N/A	#N/A	#N/A	#N/A
Mj-9072	XP_027215787.1	uncharacterized protein LOC113808557 [Penaeus vannamei]	94.82	3e-126	390	#N/A	#N/A
Mj-9083	ROT82026.1	putative serine/threonine protein kinase rio3 [Penaeus vannamei]	90.07	0	1140	GO:0003674,GO:0003824,GO:0004672,GO:0005575,GO:0005622,GO:0005623,GO:0005634,GO:0005737,GO:0006464,GO:0006468,GO:0006793,GO:0006796,GO:0006807,GO:0008150,GO:0008152,GO:0009987,GO:0016301,GO:0016310,GO:0016740,GO:0016772,GO:0016773,GO:0019538,GO:0036211,GO:0043170,GO:0043226,GO:0043227,GO:0043229,GO:0043231,GO:0043412,GO:0044237,GO:0044238,GO:0044260,GO:0044267,GO:0044424,GO:0044464,GO:0071704,GO:…	T
Mj-910	XP_027217517.1	uncharacterized protein LOC113810030 [Penaeus vannamei]	94.04	0	905	#N/A	I
Mj-9135	XP_027217287.1	sin3 histone deacetylase corepressor complex component SDS3-like [Penaeus vannamei]	100	2e-107	322	GO:0000118,GO:0000122,GO:0000228,GO:0000785,GO:0000790,GO:0003674,GO:0005488,GO:0005515,GO:0005575,GO:0005622,GO:0005623,GO:0005634,GO:0005654,GO:0005694,GO:0006325,GO:0006355,GO:0006357,GO:0006464,GO:0006476,GO:0006807,GO:0006996,GO:0008150,GO:0008152,GO:0009889,GO:0009890,GO:0009892,GO:0009987,GO:0010468,GO:0010556,GO:0010558,GO:0010605,GO:0010629,GO:0016043,GO:0016569,GO:0016570,GO:0016575,GO:…	DK
Mj-9137	XP_027238275.1	40S ribosomal protein S16 [Penaeus vannamei]	100	9e-102	295	GO:0000462,GO:0002181,GO:0003674,GO:0003676,GO:0003723,GO:0003735,GO:0005198,GO:0005488,GO:0005515,GO:0005575,GO:0005622,GO:0005623,GO:0005737,GO:0005829,GO:0005840,GO:0006139,GO:0006364,GO:0006396,GO:0006412,GO:0006518,GO:0006725,GO:0006807,GO:0008150,GO:0008152,GO:0009058,GO:0009059,GO:0009987,GO:0010467,GO:0015935,GO:0016070,GO:0016072,GO:0019538,GO:0022613,GO:0022626,GO:0022627,GO:0030490,GO:…	J
Mj-9153	XP_027231318.1	proteoglycan 4-like [Penaeus vannamei]	84.66	1e-140	452	#N/A	#N/A
Mj-9167	XP_027216374.1	uncharacterized protein CG1161-like [Penaeus vannamei]	100	3e-128	366	#N/A	S
Mj-9179	XP_027213217.1	peptidyl-prolyl cis-trans isomerase 5-like [Penaeus vannamei]	88.37	3e-108	320	GO:0000413,GO:0003674,GO:0003755,GO:0003824,GO:0005575,GO:0005576,GO:0005615,GO:0006464,GO:0006807,GO:0008150,GO:0008152,GO:0009987,GO:0016853,GO:0016859,GO:0018193,GO:0018208,GO:0019538,GO:0036211,GO:0043170,GO:0043412,GO:0044237,GO:0044238,GO:0044260,GO:0044267,GO:0044421,GO:0071704,GO:0140096,GO:1901564	O
Mj-9182	ROT82641.1	hypothetical protein C7M84_024195 [Penaeus vannamei]	100	4e-97	308	#N/A	E
Mj-9190	#N/A	#N/A	#N/A	#N/A	#N/A	#N/A	#N/A
Mj-9205	#N/A	#N/A	#N/A	#N/A	#N/A	#N/A	#N/A
Mj-9218	XP_027228140.1	protein held out wings-like [Penaeus vannamei]	99.72	0	563	GO:0000003,GO:0000381,GO:0001667,GO:0001709,GO:0001742,GO:0002009,GO:0002165,GO:0003674,GO:0003676,GO:0003723,GO:0003729,GO:0003730,GO:0005488,GO:0005575,GO:0005622,GO:0005623,GO:0005634,GO:0005737,GO:0006928,GO:0006996,GO:0007010,GO:0007155,GO:0007272,GO:0007275,GO:0007276,GO:0007283,GO:0007284,GO:0007399,GO:0007438,GO:0007444,GO:0007472,GO:0007475,GO:0007476,GO:0007498,GO:0007517,GO:0007521,GO:…	A
Mj-923	XP_027216441.1	RNA-binding protein cabeza-like isoform X1 [Penaeus vannamei]	94.12	1e-98	316	GO:0005575,GO:0005622,GO:0005623,GO:0005737,GO:0005829,GO:0009507,GO:0009536,GO:0043226,GO:0043227,GO:0043229,GO:0043231,GO:0044424,GO:0044444,GO:0044464	L
Mj-925	XP_027220398.1	muscleblind-like protein [Penaeus vannamei]	91.36	1e-174	528	GO:0000003,GO:0000381,GO:0001654,GO:0001745,GO:0001751,GO:0001754,GO:0003674,GO:0003676,GO:0003677,GO:0005488,GO:0005575,GO:0005622,GO:0005623,GO:0005634,GO:0005737,GO:0006915,GO:0006996,GO:0007275,GO:0007399,GO:0007422,GO:0007423,GO:0007517,GO:0007525,GO:0007610,GO:0007617,GO:0007618,GO:0008150,GO:0008219,GO:0009653,GO:0009887,GO:0009987,GO:0010468,GO:0012501,GO:0016043,GO:0019098,GO:0019219,GO:…	K
Mj-9275	XP_027224120.1	uncharacterized protein LOC113816281 [Penaeus vannamei]	95.38	0	736	#N/A	EI
Mj-9295	ROT70187.1	60S ribosomal protein L13a [Penaeus vannamei]	96.59	3e-125	360	#N/A	U
Mj-9298	#N/A	#N/A	#N/A	#N/A	#N/A	#N/A	#N/A
Mj-9304	#N/A	#N/A	#N/A	#N/A	#N/A	#N/A	#N/A
Mj-9345	XP_027210102.1	ras-related protein Rab-35-like [Penaeus vannamei]	100	2e-126	397	GO:0000278,GO:0000281,GO:0000910,GO:0003674,GO:0003824,GO:0003924,GO:0005575,GO:0005622,GO:0005623,GO:0005737,GO:0005768,GO:0006810,GO:0006887,GO:0007049,GO:0007154,GO:0007165,GO:0007264,GO:0007265,GO:0008150,GO:0009987,GO:0010008,GO:0012505,GO:0016020,GO:0016192,GO:0016197,GO:0016462,GO:0016787,GO:0016817,GO:0016818,GO:0017111,GO:0022402,GO:0023052,GO:0031090,GO:0031410,GO:0031982,GO:0032456,GO:…	U
Mj-944	XP_027237021.1	ras-related protein Rab-2A [Penaeus vannamei]	48.62	9e-46	167	GO:0000166,GO:0001654,GO:0001775,GO:0001882,GO:0001883,GO:0002252,GO:0002263,GO:0002274,GO:0002275,GO:0002283,GO:0002366,GO:0002376,GO:0002443,GO:0002444,GO:0002446,GO:0003674,GO:0003824,GO:0003924,GO:0005488,GO:0005575,GO:0005622,GO:0005623,GO:0005737,GO:0005783,GO:0005789,GO:0005794,GO:0005829,GO:0005886,GO:0006810,GO:0006887,GO:0006913,GO:0006955,GO:0006996,GO:0007029,GO:0007154,GO:0007165,GO:…	U
Mj-946	ROT81863.1	LIM domain-binding protein 3 [Penaeus vannamei]	85.05	6e-108	352	#N/A	TZ
Mj-9476	ROT71202.1	ADP-ribosylation factor 1 [Penaeus vannamei]	99.47	2e-128	384	GO:0000003,GO:0000278,GO:0000280,GO:0000281,GO:0000910,GO:0001505,GO:0001654,GO:0001745,GO:0002682,GO:0003674,GO:0003824,GO:0003924,GO:0005575,GO:0005622,GO:0005623,GO:0005737,GO:0005794,GO:0005795,GO:0005886,GO:0006810,GO:0006836,GO:0006892,GO:0006893,GO:0006897,GO:0006996,GO:0007049,GO:0007112,GO:0007140,GO:0007154,GO:0007165,GO:0007264,GO:0007265,GO:0007267,GO:0007268,GO:0007269,GO:0007275,GO:…	U
Mj-9487	XP_027222748.1	ribosome biogenesis protein NSA2 homolog [Penaeus vannamei]	97.31	3e-179	503	GO:0000460,GO:0000470,GO:0005575,GO:0005622,GO:0005623,GO:0005634,GO:0005730,GO:0006139,GO:0006364,GO:0006396,GO:0006725,GO:0006807,GO:0008150,GO:0008152,GO:0009987,GO:0010467,GO:0016070,GO:0016072,GO:0022613,GO:0030684,GO:0030687,GO:0031974,GO:0031981,GO:0032991,GO:0034470,GO:0034641,GO:0034660,GO:0042254,GO:0042273,GO:0043170,GO:0043226,GO:0043227,GO:0043228,GO:0043229,GO:0043231,GO:0043232,GO:…	J
Mj-9488	ROT77400.1	ribosomal protein S6 [Penaeus vannamei]	95.79	2e-122	362	GO:0002181,GO:0002376,GO:0003674,GO:0003735,GO:0005198,GO:0005575,GO:0005622,GO:0005623,GO:0005737,GO:0005829,GO:0005840,GO:0006139,GO:0006364,GO:0006396,GO:0006412,GO:0006518,GO:0006725,GO:0006807,GO:0006955,GO:0008150,GO:0008152,GO:0009058,GO:0009059,GO:0009987,GO:0010467,GO:0015935,GO:0016070,GO:0016072,GO:0019538,GO:0022613,GO:0022626,GO:0022627,GO:0032991,GO:0034470,GO:0034641,GO:0034645,GO:…	J
Mj-9491	XP_027211650.1	SIN3-HDAC complex-associated factor-like [Penaeus vannamei]	100	7e-158	486	GO:0000118,GO:0000228,GO:0000785,GO:0000790,GO:0005575,GO:0005622,GO:0005623,GO:0005634,GO:0005654,GO:0005694,GO:0008150,GO:0016580,GO:0030334,GO:0030336,GO:0031974,GO:0031981,GO:0032879,GO:0032991,GO:0040012,GO:0040013,GO:0043226,GO:0043227,GO:0043228,GO:0043229,GO:0043231,GO:0043232,GO:0043233,GO:0044422,GO:0044424,GO:0044427,GO:0044428,GO:0044446,GO:0044451,GO:0044454,GO:0044464,GO:0048519,GO:…	S
Mj-950	XP_027232157.1	LOW QUALITY PROTEIN: fidgetin-like [Penaeus vannamei]	95.51	0	1221	#N/A	O
Mj-9501	XP_027233390.1	60S ribosomal protein L22-like [Penaeus vannamei]	98.39	1e-63	221	GO:0002181,GO:0003674,GO:0003676,GO:0003723,GO:0003735,GO:0005198,GO:0005488,GO:0005575,GO:0005622,GO:0005623,GO:0005737,GO:0005829,GO:0005840,GO:0006412,GO:0006518,GO:0006807,GO:0008150,GO:0008152,GO:0009058,GO:0009059,GO:0009987,GO:0010467,GO:0015934,GO:0019538,GO:0022625,GO:0022626,GO:0032991,GO:0034641,GO:0034645,GO:0043043,GO:0043170,GO:0043226,GO:0043228,GO:0043229,GO:0043232,GO:0043603,GO:…	J
Mj-9503	ROT84015.1	hypothetical protein C7M84_022804 [Penaeus vannamei]	78.98	4e-159	473	#N/A	#N/A
Mj-9513	BBC20610.1	hypothetical protein [Penaeus japonicus]	95.24	5e-80	246	#N/A	#N/A
Mj-9514	XP_027232898.1	protein Tob2-like [Penaeus vannamei]	86.09	2e-118	367	#N/A	T
Mj-9527	XP_027214423.1	superoxide dismutase [Cu-Zn]-like [Penaeus vannamei]	89.78	3e-132	380	GO:0000302,GO:0000303,GO:0000305,GO:0001306,GO:0003674,GO:0003824,GO:0004784,GO:0005488,GO:0005507,GO:0005515,GO:0005575,GO:0005576,GO:0005615,GO:0005622,GO:0005623,GO:0005737,GO:0005777,GO:0006801,GO:0006950,GO:0006979,GO:0007275,GO:0007568,GO:0007571,GO:0008150,GO:0008152,GO:0008270,GO:0008340,GO:0009636,GO:0009894,GO:0009987,GO:0010035,GO:0010259,GO:0010506,GO:0010821,GO:0016209,GO:0016491,GO:…	P	crayfish hemocyte marker
Mj-9528	#N/A	#N/A	#N/A	#N/A	#N/A	#N/A	#N/A
Mj-9530	XP_027236636.1	glutenin, low molecular weight subunit-like [Penaeus vannamei]	97.44	3e-26	108	#N/A	S
Mj-9534	XP_027212322.1	eukaryotic translation initiation factor 3 subunit C-like [Penaeus vannamei]	98.27	0	1498	GO:0003674,GO:0003676,GO:0003723,GO:0003743,GO:0005488,GO:0005515,GO:0005575,GO:0005622,GO:0005623,GO:0005737,GO:0005829,GO:0005852,GO:0006412,GO:0006413,GO:0006518,GO:0006807,GO:0008135,GO:0008150,GO:0008152,GO:0009058,GO:0009059,GO:0009987,GO:0010467,GO:0019538,GO:0031369,GO:0032991,GO:0034641,GO:0034645,GO:0043043,GO:0043170,GO:0043603,GO:0043604,GO:0044237,GO:0044238,GO:0044249,GO:0044260,GO:…	J
Mj-9535	AKM12661.1	syntenin [Penaeus japonicus]	99.06	0	572	#N/A	K
Mj-9537	ROT81893.1	Palmitoyltransferase ZDHHC2 [Penaeus vannamei]	99.21	0	771	GO:0003674,GO:0003824,GO:0005575,GO:0005622,GO:0005623,GO:0005737,GO:0005783,GO:0005886,GO:0006464,GO:0006497,GO:0006807,GO:0008150,GO:0008152,GO:0009058,GO:0009059,GO:0009987,GO:0012505,GO:0016020,GO:0016409,GO:0016417,GO:0016740,GO:0016746,GO:0016747,GO:0018345,GO:0019538,GO:0019706,GO:0019707,GO:0034645,GO:0036211,GO:0042157,GO:0042158,GO:0043170,GO:0043226,GO:0043227,GO:0043229,GO:0043231,GO:…	S
Mj-9546	ACN32215.1	centaurin-alpha 1-like protein [Penaeus japonicus]	100	0	808	#N/A	T
Mj-9552	ROT70668.1	hypothetical protein C7M84_011043 [Penaeus vannamei]	53.26	2e-11	62.4	#N/A	#N/A
Mj-9588	XP_027219620.1	60S acidic ribosomal protein P2-like [Penaeus vannamei]	92.19	6e-33	115	GO:0002181,GO:0003674,GO:0003735,GO:0005198,GO:0005575,GO:0005622,GO:0005623,GO:0005737,GO:0005829,GO:0005840,GO:0006412,GO:0006518,GO:0006807,GO:0008150,GO:0008152,GO:0009058,GO:0009059,GO:0009987,GO:0010467,GO:0015934,GO:0019538,GO:0022625,GO:0022626,GO:0032991,GO:0034641,GO:0034645,GO:0043043,GO:0043170,GO:0043226,GO:0043228,GO:0043229,GO:0043232,GO:0043603,GO:0043604,GO:0044237,GO:0044238,GO:…	J
Mj-9594	XP_027216924.1	uncharacterized protein LOC113809504 [Penaeus vannamei]	30.13	9e-28	125	#N/A	#N/A
Mj-9601	XP_027231516.1	uncharacterized protein LOC113823100 [Penaeus vannamei]	83.89	0	1111	#N/A	S
Mj-9611	AAU12180.1	G protein beta 1 subunit [Penaeus vannamei]	100	0	706	GO:0001667,GO:0002009,GO:0003007,GO:0003365,GO:0003371,GO:0003379,GO:0003380,GO:0005575,GO:0005622,GO:0005623,GO:0005834,GO:0005886,GO:0006928,GO:0006996,GO:0007010,GO:0007154,GO:0007155,GO:0007163,GO:0007165,GO:0007186,GO:0007275,GO:0007369,GO:0007398,GO:0007399,GO:0007405,GO:0007498,GO:0007507,GO:0008104,GO:0008150,GO:0008283,GO:0008356,GO:0009653,GO:0009790,GO:0009887,GO:0009888,GO:0009898,GO:…	S
Mj-965	XP_027224909.1	adapter molecule Crk-like [Penaeus vannamei]	94.4	5e-167	499	GO:0000003,GO:0000768,GO:0001667,GO:0001932,GO:0001934,GO:0002009,GO:0002064,GO:0002065,GO:0002066,GO:0002165,GO:0003006,GO:0003674,GO:0005070,GO:0005488,GO:0005515,GO:0006810,GO:0006897,GO:0006909,GO:0006911,GO:0006928,GO:0006949,GO:0007154,GO:0007165,GO:0007166,GO:0007167,GO:0007169,GO:0007275,GO:0007276,GO:0007281,GO:0007292,GO:0007297,GO:0007298,GO:0007444,GO:0007520,GO:0007552,GO:0007560,GO:…	T
Mj-9672	XP_027215232.1	hunchback-like protein isoform X2 [Penaeus vannamei]	99.37	9e-90	270	GO:0003674,GO:0003676,GO:0003677,GO:0005488,GO:0005575,GO:0005622,GO:0005623,GO:0005634,GO:0006355,GO:0006357,GO:0008150,GO:0009889,GO:0010468,GO:0010556,GO:0019219,GO:0019222,GO:0031323,GO:0031326,GO:0043226,GO:0043227,GO:0043229,GO:0043231,GO:0043565,GO:0044424,GO:0044464,GO:0050789,GO:0050794,GO:0051171,GO:0051252,GO:0060255,GO:0065007,GO:0080090,GO:0097159,GO:1901363,GO:1903506,GO:2000112,GO:…	S
Mj-97	XP_027217959.1	uncharacterized protein LOC113810472 [Penaeus vannamei]	90.72	0	2404	#N/A	T
Mj-971	#N/A	#N/A	#N/A	#N/A	#N/A	#N/A	#N/A
Mj-9762	XP_027211822.1	40S ribosomal protein S12-like [Penaeus vannamei]	99.28	8e-97	283	#N/A	J
Mj-9825	ROT68632.1	ribosomal protein P1 [Penaeus vannamei]	78.76	5e-38	129	GO:0001932,GO:0001934,GO:0002181,GO:0003674,GO:0003735,GO:0005198,GO:0005575,GO:0005622,GO:0005623,GO:0005737,GO:0005829,GO:0005840,GO:0006412,GO:0006518,GO:0006807,GO:0008047,GO:0008150,GO:0008152,GO:0009058,GO:0009059,GO:0009893,GO:0009987,GO:0010467,GO:0010562,GO:0010604,GO:0015934,GO:0019207,GO:0019209,GO:0019220,GO:0019222,GO:0019538,GO:0019887,GO:0022625,GO:0022626,GO:0030234,GO:0030295,GO:…	J
Mj-986	XP_027228367.1	CCAAT/enhancer-binding protein-like [Penaeus vannamei]	93.73	2e-157	476	GO:0000003,GO:0000976,GO:0000977,GO:0001012,GO:0001067,GO:0001667,GO:0001708,GO:0002064,GO:0002065,GO:0002066,GO:0003006,GO:0003674,GO:0003676,GO:0003677,GO:0003690,GO:0005488,GO:0005575,GO:0005622,GO:0005623,GO:0005634,GO:0006355,GO:0006357,GO:0006928,GO:0007276,GO:0007281,GO:0007292,GO:0007297,GO:0007298,GO:0008150,GO:0009888,GO:0009889,GO:0009891,GO:0009893,GO:0009987,GO:0010468,GO:0010556,GO:…	K
Mj-9865	XP_027226726.1	bromodomain-containing protein DDB_G0270170-like [Penaeus vannamei]	79.25	3e-08	53.1	#N/A	#N/A
Mj-9889	XP_027209382.1	uncharacterized protein LOC113802927 [Penaeus vannamei]	98.96	0	749	GO:0001666,GO:0006950,GO:0008150,GO:0009628,GO:0009636,GO:0009987,GO:0010033,GO:0035690,GO:0036293,GO:0042221,GO:0042493,GO:0045471,GO:0046677,GO:0050896,GO:0051716,GO:0070482,GO:0070887,GO:0071236,GO:0071310,GO:0071361,GO:0097237,GO:0097305,GO:0097306,GO:1901700,GO:1901701	C
Mj-9907	XP_027224923.1	LOW QUALITY PROTEIN: otoferlin-like [Penaeus vannamei]	87.59	0	2142	#N/A	M
Mj-991	XP_027211194.1	serine/threonine-protein kinase 26-like [Penaeus vannamei]	97.26	0	927	GO:0000165,GO:0000185,GO:0000902,GO:0001932,GO:0001934,GO:0003674,GO:0003824,GO:0004672,GO:0004674,GO:0005488,GO:0005515,GO:0005575,GO:0005622,GO:0005623,GO:0005737,GO:0005794,GO:0006464,GO:0006468,GO:0006793,GO:0006796,GO:0006807,GO:0006950,GO:0007043,GO:0007154,GO:0007165,GO:0007275,GO:0007346,GO:0007399,GO:0008150,GO:0008152,GO:0008349,GO:0009653,GO:0009887,GO:0009893,GO:0009966,GO:0009967,GO:…	T
Mj-9922	ROT83048.1	putative M-phase inducer phosphatase [Penaeus vannamei]	91.19	0	1050	GO:0000086,GO:0000226,GO:0000278,GO:0002009,GO:0002165,GO:0003674,GO:0003824,GO:0004721,GO:0004725,GO:0005575,GO:0005622,GO:0005623,GO:0005634,GO:0005694,GO:0006464,GO:0006470,GO:0006793,GO:0006796,GO:0006807,GO:0006996,GO:0007010,GO:0007017,GO:0007030,GO:0007049,GO:0007098,GO:0007099,GO:0007275,GO:0007346,GO:0007369,GO:0007399,GO:0007422,GO:0007424,GO:0007444,GO:0007488,GO:0007498,GO:0007552,GO:…	D
Mj-994	XP_027225538.1	probable G-protein coupled receptor B0563.6 isoform X1 [Penaeus vannamei]	74.14	0	709	#N/A	T
Mj-9944	#N/A	#N/A	#N/A	#N/A	#N/A	#N/A	#N/A
MT-ATP8	#N/A	#N/A	#N/A	#N/A	#N/A	#N/A	#N/A
MT-COX2a	#N/A	#N/A	#N/A	#N/A	#N/A	#N/A	#N/A
MT-COX2b	#N/A	#N/A	#N/A	#N/A	#N/A	#N/A	#N/A
MT-CYTB	#N/A	#N/A	#N/A	#N/A	#N/A	#N/A	#N/A
MT-ND1a	#N/A	#N/A	#N/A	#N/A	#N/A	#N/A	#N/A
MT-ND1c	#N/A	#N/A	#N/A	#N/A	#N/A	#N/A	#N/A
MT-ND1d	#N/A	#N/A	#N/A	#N/A	#N/A	#N/A	#N/A
MT-ND2	#N/A	#N/A	#N/A	#N/A	#N/A	#N/A	#N/A
MT-ND4	#N/A	#N/A	#N/A	#N/A	#N/A	#N/A	#N/A
MT-ND5a	#N/A	#N/A	#N/A	#N/A	#N/A	#N/A	#N/A
