# Supplementary material for: Single-cell RNA-seq analysis reveals penaeid shrimp hemocyte subpopulations and cell differentiation process
Source: eLife. 2021 Jun 16;10:e66954. doi: 10.7554/eLife.66954 (PMC8266392; doi:10.7554/eLife.66954)
Supplement: Supplementary file 2. [file elife-66954-supp2.xlsx]

## Sheet: Supplementary file 2
Table representing predicted marker genes per cluster.
Single-cell RNA-seq analysis reveals penaeid shrimp hemocyte subpopulations and cell differentiation process
Keiichiro Koiwai a, b, *, Takashi Koyama c, d, Soichiro Tsuda e, Atsushi Toyoda f, Kiyoshi Kikuchi c, Hiroaki Suzuki g, Ryuji Kawano a
a Department of Biotechnology and Life Science, Tokyo University of Agriculture and Technology, Koganei, Tokyo 184-8588, Japan
a Laboratory of Genome Science, Tokyo University of Marine Science and Technology, Minato, Tokyo, 108-8477, Japan
c Fisheries Laboratory, Graduate School of Agricultural and Life Sciences, The University of Tokyo, Hamamatsu, Shizuoka 431-0214, Japan
d Graduate School of Fisheries and Environmental Sciences, Nagasaki University, Bunkyo-machi, Nagasaki, Nagasaki 852-8521, Japan
e bitBiome Inc., Waseda University Incubation Center, Nishiwaseda, Shinjuku, Tokyo 169-0051, Japan
f Advanced Genomics Center, National Institute of Genetics, Mishima, Shizuoka 411-8540, Japan
g Department of Precision Mechanics, Faculty of Science and Engineering, Chuo University, Bunkyo, Tokyo 112-8551, Japan
*To whom correspondence should be addressed. Email: koiwai@kaiyodai.ac.jp
Assembled genes	protein name [scientific name]	p-values for the differentially expressed genes	average ln fold change (log2)	what percentage of the cells in the condition 1 show some expression for this gene	what percentage of the cells in the condition 2 show some expression for this gene	adjusted p-value	cluster
Mj-2946	serine/arginine-rich splicing factor 3-like [Penaeus vannamei]	7.1821e-162	1.62329	1	0.998	2.13883e-157	Hem1
Mj-18644	putative polypyrimidine tract-binding protein 1 isoform X1 [Penaeus vannamei]	5.41523e-151	1.51517	1	0.998	1.61265e-146	Hem1
Mj-6729	#N/A	1.3096e-149	1.81201	1	0.922	3.9e-145	Hem1
Mj-6	LOW QUALITY PROTEIN: hemocytin-like [Penaeus vannamei]	2.78184e-148	1.66133	1	0.97	8.28431e-144	Hem1
Mj-2871	anoctamin-7-like isoform X5 [Penaeus vannamei]	3.75518e-148	1.74552	1	0.94	1.11829e-143	Hem1
Mj-27632	ubiquitin carboxyl-terminal hydrolase isozyme L3-like [Penaeus vannamei]	6.66339e-148	1.67942	1	0.995	1.98436e-143	Hem1
Mj-925	muscleblind-like protein [Penaeus vannamei]	2.68091e-146	1.59087	1	0.995	7.98375e-142	Hem1
Mj-25972	muscleblind-like protein [Penaeus vannamei]	5.32208e-146	1.65574	1	0.976	1.58492e-141	Hem1
Mj-27633	ubiquitin carboxyl-terminal hydrolase isozyme L3-like [Penaeus vannamei]	1.04068e-143	1.75505	1	0.942	3.09915e-139	Hem1
Mj-12728	acetyl-coenzyme A synthetase, cytoplasmic-like [Penaeus vannamei]	5.65473e-139	1.74336	1	0.925	1.68398e-134	Hem1
Mj-22024	RNA-binding protein 1-like [Penaeus vannamei]	6.63391e-139	1.45388	1	0.991	1.97558e-134	Hem1
Mj-6091	#N/A	1.65785e-138	1.52804	1	0.995	4.93708e-134	Hem1
Mj-30884	acylglycerol kinase, mitochondrial-like [Penaeus vannamei]	2.93054e-138	1.75201	1	0.947	8.72715e-134	Hem1
Mj-16125	uncharacterized protein LOC113829325 [Penaeus vannamei]	2.84286e-134	1.59895	1	0.995	8.46602e-130	Hem1
Mj-24669	uncharacterized protein DDB_G0271670-like [Penaeus vannamei]	1.4127e-127	1.62638	1	0.928	4.20703e-123	Hem1
Mj-8106	adenomatous polyposis coli protein-like isoform X1 [Penaeus vannamei]	3.79056e-124	1.78934	1	0.902	1.12883e-119	Hem1
Mj-8824	#N/A	3.98549e-124	1.91247	1	0.832	1.18688e-119	Hem1
Mj-23706	#N/A	1.23377e-119	1.71981	1	0.851	3.67418e-115	Hem1
Mj-17707	Bromodomain-containing protein 8 [Penaeus vannamei]	7.40187e-118	1.66539	1	0.885	2.20428e-113	Hem1
Mj-9218	protein held out wings-like [Penaeus vannamei]	4.23643e-116	1.73596	0.994	0.818	1.26161e-111	Hem1
Mj-10815	#N/A	1.23402e-113	1.68354	1	0.872	3.67491e-109	Hem1
Mj-17216	beta-actin [Penaeus vannamei]	1.00028e-110	1.13164	1	0.998	2.97884e-106	Hem1
Mj-11009	DNA damage-binding protein 2-like [Penaeus vannamei]	3.51055e-110	1.78261	0.988	0.747	1.04544e-105	Hem1
Mj-14846	genetic suppressor element 1-like [Penaeus vannamei]	3.65791e-110	1.56896	1	0.872	1.08933e-105	Hem1
Mj-25967	muscleblind-like protein [Penaeus vannamei]	1.28486e-105	1.59142	1	0.886	3.82631e-101	Hem1
Mj-3438	uncharacterized protein DDB_G0271670-like [Penaeus vannamei]	1.73419e-98	1.5805	1	0.818	5.16443e-94	Hem1
Mj-9865	bromodomain-containing protein DDB_G0270170-like [Penaeus vannamei]	5.51152e-97	1.62234	0.994	0.784	1.64133e-92	Hem1
Mj-13369	uncharacterized protein LOC113808203 [Penaeus vannamei]	1.03721e-96	1.40024	1	0.92	3.08882e-92	Hem1
Mj-6537	#N/A	3.99006e-95	1.61621	0.994	0.739	1.18824e-90	Hem1
Mj-27074	type 1 phosphodiesterase [Penaeus vannamei]	4.49384e-86	1.13979	0.988	0.975	1.33827e-81	Hem1
Mj-28105	hypothetical protein C7M84_000055 [Penaeus vannamei]	4.51375e-86	1.6313	0.982	0.704	1.34419e-81	Hem1
Mj-10497	#N/A	1.02257e-83	1.45338	0.988	0.776	3.04522e-79	Hem1
Mj-11828	LOW QUALITY PROTEIN: uncharacterized protein LOC113826695 [Penaeus vannamei]	4.44056e-77	1.65811	0.964	0.558	1.3224e-72	Hem1
Mj-4243	#N/A	5.13852e-77	1.7422	0.976	0.638	1.53025e-72	Hem1
Mj-9135	sin3 histone deacetylase corepressor complex component SDS3-like [Penaeus vannamei]	1.01282e-76	1.58293	0.946	0.625	3.01619e-72	Hem1
Mj-21665	putative RNA-directed DNA polymerase from mobile element jockey-like [Penaeus vannamei]	2.47632e-75	1.5593	0.958	0.586	7.37447e-71	Hem1
Mj-27070	lysine-specific demethylase 2A-like [Penaeus vannamei]	6.95882e-75	1.6427	0.958	0.594	2.07234e-70	Hem1
Mj-28199	LOW QUALITY PROTEIN: hemocytin-like [Penaeus vannamei]	1.86285e-74	1.59865	0.952	0.607	5.54758e-70	Hem1
Mj-7169	LOW QUALITY PROTEIN: zinc finger SWIM domain-containing protein 8-like [Penaeus vannamei]	1.67277e-73	1.56188	0.964	0.589	4.9815e-69	Hem1
Mj-23864	protein ABHD13-like [Penaeus vannamei]	1.4238e-69	1.48216	0.958	0.595	4.24007e-65	Hem1
Mj-14875	#N/A	1.73608e-69	1.49031	0.97	0.66	5.17004e-65	Hem1
Mj-14439	LOW QUALITY PROTEIN: bestrophin-3-like [Penaeus vannamei]	2.04344e-69	1.54196	0.952	0.569	6.08535e-65	Hem1
Mj-26350	putative anamorsin isoform X1 [Penaeus vannamei]	4.97384e-69	1.67483	0.917	0.533	1.48121e-64	Hem1
Mj-19722	#N/A	1.68419e-68	1.71181	0.952	0.606	5.01552e-64	Hem1
Mj-10473	#N/A	9.31697e-68	1.60882	0.958	0.674	2.77459e-63	Hem1
Mj-146	ubiquitin carboxyl-terminal hydrolase 7-like [Penaeus vannamei]	1.69371e-66	1.30311	0.982	0.792	5.04388e-62	Hem1
Mj-12161	#N/A	1.71527e-63	1.59329	0.905	0.525	5.10807e-59	Hem1
Mj-16731	coagulation factor IX-like [Penaeus vannamei]	2.74552e-63	1.45354	0.952	0.666	8.17616e-59	Hem1
Mj-22613	mid1-interacting protein 1-like [Penaeus vannamei]	4.36655e-62	1.35087	0.964	0.721	1.30036e-57	Hem1
Mj-22023	lysine-specific demethylase 3A-like [Penaeus vannamei]	3.96374e-59	1.3876	0.881	0.64	1.1804e-54	Hem1
Mj-24932	E3 ubiquitin-protein ligase HUWE1-like [Penaeus vannamei]	1.6224e-56	1.46511	0.893	0.492	4.83152e-52	Hem1
Mj-15628	putative myosin light chain kinase [Penaeus vannamei]	1.73566e-55	1.53617	0.875	0.432	5.1688e-51	Hem1
Mj-18057	histone deacetylase 3-like [Penaeus vannamei]	3.98798e-54	1.45661	0.881	0.541	1.18762e-49	Hem1
Mj-1917	myotubularin-related protein 2-like isoform X1 [Penaeus vannamei]	8.87944e-54	1.47661	0.821	0.409	2.6443e-49	Hem1
Mj-13087	zinc finger protein 609-like [Penaeus vannamei]	1.64448e-53	1.463	0.893	0.542	4.89726e-49	Hem1
Mj-7233	phosphatidylinositol-binding clathrin assembly protein LAP-like isoform X11 [Penaeus vannamei]	2.44541e-52	1.52463	0.863	0.424	7.28244e-48	Hem1
Mj-27585	arginine-glutamic acid dipeptide repeats protein-like isoform X2 [Penaeus vannamei]	2.98593e-52	1.34402	0.958	0.66	8.8921e-48	Hem1
Mj-1557	#N/A	3.77092e-52	1.26535	0.952	0.667	1.12298e-47	Hem1
Mj-12560	#N/A	2.84351e-51	1.49075	0.804	0.371	8.46798e-47	Hem1
Mj-18575	putative anamorsin isoform X1 [Penaeus vannamei]	5.95596e-51	1.47859	0.845	0.438	1.77369e-46	Hem1
Mj-1951	ubiquitin-conjugating enzyme E2 variant 2-like [Penaeus vannamei]	6.52337e-51	1.3308	0.893	0.536	1.94266e-46	Hem1
Mj-556	protein FAM13A-like isoform X1 [Penaeus vannamei]	2.38062e-50	1.37422	0.887	0.588	7.08948e-46	Hem1
Mj-26571	protein-tyrosine sulfotransferase-like [Penaeus vannamei]	4.29055e-50	1.61786	0.75	0.269	1.27773e-45	Hem1
Mj-19978	#N/A	5.60957e-49	1.26574	0.911	0.633	1.67053e-44	Hem1
Mj-20811	purine nucleoside phosphorylase-like isoform X1 [Penaeus vannamei]	7.06788e-49	1.42252	0.857	0.456	2.10481e-44	Hem1
Mj-13357	#N/A	7.82417e-49	1.01647	0.97	0.812	2.33004e-44	Hem1
Mj-13146	ras-related GTP-binding protein A isoform X1 [Penaeus vannamei]	1.23725e-48	1.34776	0.857	0.529	3.68452e-44	Hem1
Mj-14951	tropomyosin isoform X21 [Penaeus vannamei]	1.197e-47	1.05725	0.964	0.837	3.56465e-43	Hem1
Mj-18335	uncharacterized protein LOC113825948 [Penaeus vannamei]	3.55989e-47	1.28164	0.851	0.55	1.06014e-42	Hem1
Mj-19272	uncharacterized protein LOC113817419 [Penaeus vannamei]	5.02487e-47	1.38219	0.845	0.447	1.49641e-42	Hem1
Mj-1578	drebrin-like protein B isoform X1 [Penaeus vannamei]	1.14065e-46	1.38787	0.863	0.467	3.39687e-42	Hem1
Mj-14139	amyloid-beta-like protein isoform X1 [Penaeus vannamei]	5.01221e-46	1.02715	0.97	0.854	1.49264e-41	Hem1
Mj-11613	hypothetical protein C7M84_007304, partial [Penaeus vannamei]	2.51834e-45	1.42102	0.762	0.312	7.4996e-41	Hem1
Mj-8173	uncharacterized protein LOC113823401 [Penaeus vannamei]	3.76474e-45	1.3551	0.81	0.444	1.12114e-40	Hem1
Mj-23889	1-phosphatidylinositol 4,5-bisphosphate phosphodiesterase classes I and II-like [Penaeus vannamei]	3.88584e-44	1.32737	0.839	0.469	1.1572e-39	Hem1
Mj-29929	LOW QUALITY PROTEIN: bestrophin-3-like [Penaeus vannamei]	4.79117e-44	1.36663	0.839	0.434	1.42681e-39	Hem1
Mj-26836	titin-like [Penaeus vannamei]	5.63341e-44	1.30463	0.869	0.53	1.67763e-39	Hem1
Mj-1512	uncharacterized protein LOC113800539 [Penaeus vannamei]	1.42591e-43	1.32027	0.845	0.554	4.24637e-39	Hem1
Mj-15620	LOW QUALITY PROTEIN: probable Ras GTPase-activating protein [Penaeus vannamei]	1.68328e-43	1.33219	0.863	0.483	5.0128e-39	Hem1
Mj-22709	Cell division cycle 7-related protein kinase [Penaeus vannamei]	3.10388e-43	1.36299	0.792	0.401	9.24337e-39	Hem1
Mj-16347	hypothetical protein C7M84_005959 [Penaeus vannamei]	3.28732e-43	1.42603	0.762	0.367	9.78964e-39	Hem1
Mj-27211	uncharacterized protein LOC113820643 [Penaeus vannamei]	3.74055e-43	1.39664	0.804	0.427	1.11393e-38	Hem1
Mj-15930	synaptogyrin-like [Penaeus vannamei]	4.46879e-43	1.171	0.994	0.912	1.3308e-38	Hem1
Mj-20283	#N/A	5.0838e-43	1.474	0.774	0.412	1.51396e-38	Hem1
Mj-28902	putative phosphatase and actin regulator 4 isoform X4 [Penaeus vannamei]	7.39281e-43	1.43674	0.738	0.346	2.20158e-38	Hem1
Mj-12622	uncharacterized protein LOC113820643 [Penaeus vannamei]	2.227e-42	1.38425	0.815	0.456	6.63199e-38	Hem1
Mj-8668	eukaryotic translation initiation factor 5B-like [Penaeus vannamei]	9.72681e-42	1.41758	0.792	0.405	2.89665e-37	Hem1
Mj-2529	activating signal cointegrator 1-like [Penaeus vannamei]	1.93899e-41	1.40657	0.786	0.405	5.7743e-37	Hem1
Mj-28641	U2 snRNP-associated SURP motif-containing protein-like [Penaeus vannamei]	5.70077e-41	1.39071	0.768	0.354	1.69769e-36	Hem1
Mj-27142	LOW QUALITY PROTEIN: protein 4.1 homolog [Penaeus vannamei]	1.58559e-40	1.34726	0.81	0.411	4.72189e-36	Hem1
Mj-6249	#N/A	2.73433e-40	1.27424	0.833	0.431	8.14284e-36	Hem1
Mj-15120	uncharacterized protein LOC113817469 [Penaeus vannamei]	4.15198e-40	1.5044	0.601	0.246	1.23646e-35	Hem1
Mj-10294	#N/A	1.03256e-39	1.33963	0.78	0.417	3.07496e-35	Hem1
Mj-22708	cell division cycle 7-related protein kinase-like isoform X2 [Penaeus vannamei]	1.78142e-39	1.42735	0.72	0.353	5.30506e-35	Hem1
Mj-24812	#N/A	3.9742e-39	1.40222	0.756	0.364	1.18352e-34	Hem1
Mj-18830	hypothetical protein C7M84_002203 [Penaeus vannamei]	1.1909e-38	1.39359	0.702	0.289	3.5465e-34	Hem1
MT-COX2b	#N/A	3.7468e-38	1.00388	0.946	0.748	1.1158e-33	Hem1
Mj-23805	activating signal cointegrator 1-like [Penaeus vannamei]	5.24893e-38	1.34805	0.78	0.363	1.56313e-33	Hem1
Mj-11478	putative beclin-1-like protein isoform X1 [Penaeus vannamei]	2.76075e-37	1.30381	0.75	0.355	8.22151e-33	Hem1
Mj-23888	1-phosphatidylinositol 4,5-bisphosphate phosphodiesterase classes I and II-like [Penaeus vannamei]	7.86903e-36	1.22318	0.798	0.501	2.3434e-31	Hem1
Mj-17470	uncharacterized protein LOC113812605 [Penaeus vannamei]	1.85651e-35	1.39301	0.774	0.371	5.52869e-31	Hem1
Mj-13947	TATA element modulatory factor-like isoform X2 [Penaeus vannamei]	4.52816e-35	1.38642	0.75	0.392	1.34849e-30	Hem1
Mj-13127	mitogen-activated protein kinase kinase 4 [Penaeus vannamei]	5.47508e-35	1.34897	0.726	0.316	1.63048e-30	Hem1
Mj-24001	LOW QUALITY PROTEIN: tribbles homolog 2-like [Penaeus vannamei]	6.53906e-35	1.32777	0.69	0.251	1.94733e-30	Hem1
Mj-1222	protein kintoun-like [Penaeus vannamei]	1.11595e-34	1.08997	0.869	0.59	3.32329e-30	Hem1
Mj-25546	LOW QUALITY PROTEIN: mitogen-activated protein kinase kinase kinase 7-interacting protein 3 homolog [Penaeus vannamei]	1.2922e-34	1.26574	0.756	0.324	3.84818e-30	Hem1
Mj-13907	eukaryotic translation initiation factor 3 subunit A-like, partial [Penaeus vannamei]	4.97814e-34	1.17886	0.804	0.504	1.48249e-29	Hem1
Mj-29547	heterochromatin-associated protein HP1, partial [Penaeus vannamei]	6.12137e-34	1.3149	0.69	0.291	1.82294e-29	Hem1
Mj-16705	putative long-chain-fatty-acid--CoA ligase 4 isoform X1 [Penaeus vannamei]	6.41706e-34	1.31234	0.679	0.276	1.911e-29	Hem1
Mj-15803	excitatory amino acid transporter 3-like isoform X1 [Penaeus vannamei]	1.21215e-33	1.27922	0.72	0.4	3.60978e-29	Hem1
Mj-5414	hypothetical protein C7M84_003077 [Penaeus vannamei]	9.84344e-33	1.28691	0.661	0.267	2.93138e-28	Hem1
Mj-25685	TBC1 domain family member 2B-like [Penaeus vannamei]	4.20492e-32	1.26413	0.702	0.317	1.25222e-27	Hem1
Mj-23553	serine/threonine-protein kinase Tao-like [Penaeus vannamei]	6.09403e-32	1.28213	0.667	0.324	1.8148e-27	Hem1
Mj-18497	hypothetical protein C7M84_011283 [Penaeus vannamei]	2.90928e-31	1.28801	0.613	0.239	8.66384e-27	Hem1
Mj-13553	#N/A	3.80246e-31	1.34604	0.631	0.265	1.13237e-26	Hem1
Mj-3111	uncharacterized protein DDB_G0271670-like isoform X1 [Penaeus vannamei]	4.86872e-31	1.35093	0.607	0.239	1.44991e-26	Hem1
Mj-12440	forkhead box protein N3-like [Penaeus vannamei]	2.73909e-30	1.31812	0.649	0.297	8.15702e-26	Hem1
Mj-15875	eukaryotic translation initiation factor 3 subunit A-like, partial [Penaeus vannamei]	2.83881e-29	1.22658	0.673	0.362	8.45399e-25	Hem1
Mj-9205	#N/A	7.12141e-29	1.30995	0.565	0.232	2.12076e-24	Hem1
Mj-6250	#N/A	7.77943e-29	1.24669	0.667	0.3	2.31672e-24	Hem1
Mj-5362	#N/A	7.07342e-28	1.08032	0.75	0.403	2.10646e-23	Hem1
Mj-12431	nucleolar protein 4-like [Penaeus vannamei]	1.00533e-27	1.19751	0.667	0.279	2.99388e-23	Hem1
Mj-15545	uncharacterized protein C6orf132 homolog isoform X2 [Penaeus vannamei]	1.23737e-27	1.0126	0.798	0.509	3.68488e-23	Hem1
Mj-27882	pinin-like [Penaeus vannamei]	1.80033e-27	1.16509	0.685	0.334	5.36139e-23	Hem1
Mj-27450	hypothetical protein C7M84_016904 [Penaeus vannamei]	4.60613e-27	1.11626	0.708	0.338	1.37171e-22	Hem1
Mj-22165	#N/A	7.07649e-27	1.21447	0.53	0.178	2.10738e-22	Hem1
Mj-12473	proteoglycan 4-like isoform X4 [Penaeus monodon]	1.00702e-26	1.10182	0.679	0.323	2.99891e-22	Hem1
Mj-1026	mucin-19-like isoform X2 [Penaeus vannamei]	1.10353e-26	1.24384	0.56	0.241	3.28631e-22	Hem1
Mj-26042	protein bric-a-brac 2-like [Penaeus vannamei]	1.8906e-26	1.16478	0.637	0.286	5.63022e-22	Hem1
Mj-2230	excitatory amino acid transporter 3-like isoform X1 [Penaeus vannamei]	1.93417e-26	1.24992	0.619	0.285	5.75996e-22	Hem1
Mj-216	lysine-specific demethylase 2A-like [Penaeus vannamei]	3.2003e-26	1.17436	0.685	0.336	9.53049e-22	Hem1
Mj-16190	titin-like isoform X3 [Penaeus vannamei]	3.99854e-26	1.02366	0.744	0.493	1.19077e-21	Hem1
Mj-1513	MPN domain-containing protein-like [Penaeus vannamei]	5.96775e-26	1.23822	0.512	0.204	1.7772e-21	Hem1
Mj-21778	uncharacterized protein LOC113821262 [Penaeus vannamei]	8.42411e-26	1.15514	0.655	0.311	2.5087e-21	Hem1
Mj-16521	uncharacterized protein LOC113809601 [Penaeus vannamei]	9.56628e-26	1.08851	0.708	0.376	2.84884e-21	Hem1
Mj-15999	putative E3 ubiquitin-protein ligase TRIM32 [Penaeus vannamei]	1.10611e-25	1.22158	0.607	0.263	3.29398e-21	Hem1
Mj-13436	#N/A	1.14223e-25	1.19939	0.512	0.176	3.40156e-21	Hem1
Mj-8125	protein-methionine sulfoxide oxidase mical3a-like [Penaeus vannamei]	2.39147e-25	1.169	0.613	0.264	7.1218e-21	Hem1
Mj-10913	#N/A	4.51998e-25	1.23817	0.512	0.188	1.34605e-20	Hem1
Mj-6503	#N/A	9.49065e-25	1.07125	0.685	0.364	2.82631e-20	Hem1
Mj-14166	Gephyrin [Penaeus vannamei]	1.09157e-24	1.24752	0.506	0.197	3.25069e-20	Hem1
Mj-14395	nuclear receptor coactivator 6-like [Penaeus vannamei]	5.4246e-24	1.09496	0.655	0.35	1.61545e-19	Hem1
Mj-4364	heterochromatin-associated protein HP1, partial [Penaeus vannamei]	6.43988e-24	1.20997	0.536	0.206	1.9178e-19	Hem1
Mj-16640	LOW QUALITY PROTEIN: WW domain-containing adapter protein with coiled-coil-like [Penaeus vannamei]	1.12045e-23	1.05554	0.583	0.281	3.33671e-19	Hem1
Mj-26139	E3 ubiquitin-protein ligase [Penaeus vannamei]	1.26818e-23	1.15199	0.571	0.243	3.77663e-19	Hem1
Mj-6596	#N/A	2.25083e-23	1.11984	0.625	0.302	6.70297e-19	Hem1
Mj-6281	#N/A	3.79623e-23	1.10491	0.583	0.215	1.13052e-18	Hem1
Mj-14495	#N/A	5.35158e-23	1.18866	0.5	0.171	1.5937e-18	Hem1
Mj-23358	uncharacterized protein LOC113802423 isoform X1 [Penaeus vannamei]	1.50086e-22	1.11766	0.56	0.216	4.46956e-18	Hem1
Mj-7786	excitatory amino acid transporter 3-like isoform X1 [Penaeus vannamei]	4.50643e-22	1.14756	0.512	0.209	1.34202e-17	Hem1
Mj-3033	putative aspartate beta-hydroxylase domain-containing protein 2-like [Penaeus vannamei]	8.39316e-22	1.05325	0.571	0.253	2.49948e-17	Hem1
Mj-15476	neuron navigator 3-like [Penaeus vannamei]	1.35987e-21	1.14072	0.536	0.251	4.04969e-17	Hem1
Mj-24931	E3 ubiquitin-protein ligase HUWE1-like [Penaeus vannamei]	2.11215e-21	1.03846	0.637	0.31	6.28998e-17	Hem1
Mj-25608	putative growth hormone secretagogue receptor type 1 [Penaeus vannamei]	5.50868e-21	1.05853	0.518	0.217	1.64048e-16	Hem1
Mj-6531	#N/A	9.21672e-21	1.08536	0.56	0.25	2.74474e-16	Hem1
Mj-342	MOB kinase activator-like 2 [Penaeus vannamei]	9.4856e-21	1.08193	0.542	0.228	2.82481e-16	Hem1
Mj-22271	uncharacterized protein LOC113802182 [Penaeus vannamei]	3.54863e-20	1.11391	0.554	0.242	1.05678e-15	Hem1
Mj-4637	wiskott-Aldrich syndrome protein-like [Penaeus vannamei]	1.10272e-19	1.05973	0.542	0.238	3.2839e-15	Hem1
Mj-3402	#N/A	1.32789e-19	1.04412	0.565	0.27	3.95446e-15	Hem1
Mj-9825	ribosomal protein P1 [Penaeus vannamei]	3.14754e-19	1.01069	0.613	0.319	9.37338e-15	Hem1
Mj-27076	type 1 phosphodiesterase [Penaeus vannamei]	7.00175e-19	1.04594	0.589	0.271	2.08512e-14	Hem1
Mj-17130	protein spinster-like isoform X1 [Penaeus vannamei]	1.62091e-18	1.09538	0.542	0.266	4.82708e-14	Hem1
Mj-15508	uncharacterized protein LOC113822415 [Penaeus vannamei]	1.877e-18	1.00366	0.518	0.23	5.58969e-14	Hem1
Mj-9072	uncharacterized protein LOC113808557 [Penaeus vannamei]	2.15702e-18	1.06469	0.571	0.278	6.42361e-14	Hem1
Mj-17933	uncharacterized protein LOC113818257 [Penaeus vannamei]	3.09863e-18	1.032	0.542	0.276	9.22772e-14	Hem1
Mj-16761	nuclear receptor coactivator 6-like [Penaeus vannamei]	4.66406e-18	1.02374	0.512	0.215	1.38896e-13	Hem1
Mj-23354	uncharacterized protein LOC113802423 isoform X1 [Penaeus vannamei]	2.73228e-17	1.0238	0.53	0.249	8.13674e-13	Hem1
Mj-28259	uncharacterized protein LOC113814237 [Penaeus vannamei]	5.64381e-262	3.29361	0.812	0.337	1.68073e-257	Hem2
Mj-18442	uncharacterized protein LOC113808957 [Penaeus vannamei]	1.41888e-252	2.97571	0.76	0.244	4.22542e-248	Hem2
Mj-16280	hemocyte transglutaminase [Penaeus japonicus]	1.46559e-252	4.33103	0.689	0.218	4.36454e-248	Hem2
Mj-13402	uncharacterized protein LOC113808957 [Penaeus vannamei]	2.56806e-251	3.09154	0.758	0.196	7.64767e-247	Hem2
Mj-18851	uncharacterized protein LOC113808957 [Penaeus vannamei]	2.13276e-244	3.15306	0.756	0.181	6.35137e-240	Hem2
Mj-19542	uncharacterized protein LOC113814237 [Penaeus vannamei]	2.22871e-242	3.28512	0.765	0.196	6.6371e-238	Hem2
Mj-21219	hemocyte transglutaminase [Penaeus japonicus]	6.8197e-238	4.16711	0.66	0.188	2.03091e-233	Hem2
Mj-16290	hemocyte transglutaminase [Penaeus japonicus]	8.42016e-232	4.22265	0.647	0.155	2.50752e-227	Hem2
Mj-28260	uncharacterized protein LOC113808957 [Penaeus vannamei]	1.8824e-221	2.68479	0.713	0.205	5.60578e-217	Hem2
Mj-21255	insulin-like growth factor-binding protein 4 [Penaeus vannamei]	1.67122e-188	2.68474	0.647	0.26	4.9769e-184	Hem2
Mj-23817	phenoloxidase-activating factor 2-like [Penaeus vannamei]	5.09569e-182	2.22278	0.626	0.187	1.5175e-177	Hem2
Mj-4262	insulin-like growth factor-binding protein 4 [Penaeus vannamei]	1.39946e-179	2.63192	0.624	0.244	4.1676e-175	Hem2
Mj-18739	#N/A	2.49035e-177	1.41878	0.884	0.735	7.41626e-173	Hem2
Mj-19206	insulin-like growth factor-binding protein 4 [Penaeus vannamei]	3.20985e-165	2.55609	0.585	0.213	9.55894e-161	Hem2
Mj-13899	hypothetical protein C7M84_013126 [Penaeus vannamei]	2.12053e-142	1.39192	0.766	0.602	6.31494e-138	Hem2
Mj-25323	#N/A	4.67742e-136	1.44585	0.695	0.481	1.39294e-131	Hem2
Mj-29105	tubulin-folding cofactor B-like isoform X1 [Penaeus vannamei]	3.82971e-107	1.23611	0.588	0.391	1.14049e-102	Hem2
Mj-25326	#N/A	1.31609e-106	1.31382	0.591	0.382	3.91931e-102	Hem2
Mj-15851	phenoloxidase-activating factor 2-like [Penaeus vannamei]	2.64556e-93	1.29469	0.5	0.269	7.87849e-89	Hem2
Mj-13889	leukocyte elastase inhibitor-like [Penaeus vannamei]	1.20404e-90	1.23247	0.552	0.388	3.58563e-86	Hem2
Mj-21282	Gamma-interferon-inducible lysosomal thiol reductase [Penaeus vannamei]	1.47652e-79	1.22423	0.606	0.354	4.39707e-75	Hem2
Mj-21283	Gamma-interferon-inducible lysosomal thiol reductase [Penaeus vannamei]	5.83899e-79	1.28507	0.575	0.311	1.73885e-74	Hem2
Mj-9907	LOW QUALITY PROTEIN: otoferlin-like [Penaeus vannamei]	5.88417e-75	1.24693	0.589	0.344	1.75231e-70	Hem2
Mj-17894	uncharacterized peptidase C1-like protein F26E4.3, partial [Penaeus vannamei]	1.10794e-71	1.31956	0.702	0.645	3.29945e-67	Hem2
Mj-1602	uncharacterized peptidase C1-like protein F26E4.3, partial [Penaeus vannamei]	3.84456e-64	1.2589	0.742	0.738	1.14491e-59	Hem2
Mj-15469	cAMP-dependent protein kinase catalytic subunit 1 isoform X1 [Penaeus vannamei]	1.45352e-62	1.0211	0.513	0.356	4.32857e-58	Hem2
Mj-24745	uncharacterized peptidase C1-like protein F26E4.3, partial [Penaeus vannamei]	2.46819e-61	1.31223	0.719	0.644	7.35026e-57	Hem2
Mj-24191	single VWC domain protein 5 [Penaeus japonicus]	4.03835e-58	1.25586	0.689	0.552	1.20262e-53	Hem2
Mj-24193	single VWC domain protein 5 [Penaeus japonicus]	2.68314e-45	1.15557	0.539	0.397	7.99039e-41	Hem2
Mj-19740	hypothetical protein [Penaeus japonicus]	0	4.64309	0.985	0.422	0	Hem3
Mj-20156	hypothetical protein [Penaeus japonicus]	0	4.36208	0.992	0.567	0	Hem3
Mj-20159	hypothetical protein [Penaeus japonicus]	0	3.61036	0.921	0.152	0	Hem3
Mj-20275	hypothetical protein [Penaeus japonicus]	0	3.94374	0.867	0.093	0	Hem3
Mj-24223	hypothetical protein [Penaeus japonicus]	0	4.39823	0.992	0.454	0	Hem3
Mj-4019	hypothetical protein [Penaeus japonicus]	0	4.43696	0.996	0.59	0	Hem3
Mj-9513	hypothetical protein [Penaeus japonicus]	0	4.81365	0.917	0.253	0	Hem3
Mj-19418	hypothetical protein [Penaeus japonicus]	1.09566e-283	3.27975	0.829	0.095	3.26286e-279	Hem3
Mj-4623	hypothetical protein [Penaeus japonicus]	2.45981e-256	3.12481	0.82	0.112	7.32531e-252	Hem3
Mj-18145	hypothetical protein C7M84_004685 [Penaeus vannamei]	1.23199e-224	2.54447	0.764	0.105	3.66888e-220	Hem3
Mj-18032	#N/A	5.58141e-219	2.48268	0.797	0.132	1.66214e-214	Hem3
Mj-2289	#N/A	2.69363e-199	2.27769	0.752	0.118	8.02163e-195	Hem3
Mj-18369	hypothetical protein C7M84_004685 [Penaeus vannamei]	2.41446e-197	2.33811	0.67	0.066	7.19027e-193	Hem3
Mj-24334	vascular endothelial growth factor 3 [Penaeus vannamei]	8.7202e-197	2.75061	0.653	0.072	2.59688e-192	Hem3
Mj-26063	#N/A	1.19043e-193	2.20044	0.709	0.091	3.54509e-189	Hem3
Mj-24075	uncharacterized protein LOC113800109 isoform X1 [Penaeus vannamei]	7.50823e-189	3.21715	0.692	0.118	2.23595e-184	Hem3
Mj-3042	PDGF/VEGF-related factor 1 [Penaeus vannamei]	7.83194e-185	2.51344	0.694	0.148	2.33235e-180	Hem3
Mj-24074	uncharacterized protein LOC113800109 isoform X1 [Penaeus vannamei]	7.20056e-184	3.22142	0.692	0.125	2.14433e-179	Hem3
Mj-19051	#N/A	1.39609e-176	2.39035	0.722	0.118	4.15756e-172	Hem3
Mj-18475	hypothetical protein C7M84_004685 [Penaeus vannamei]	1.02466e-174	2.12881	0.655	0.088	3.05144e-170	Hem3
Mj-18371	#N/A	3.61306e-174	2.1273	0.587	0.049	1.07597e-169	Hem3
Mj-19535	hypothetical protein [Penaeus japonicus]	4.15346e-173	3.08649	0.679	0.136	1.2369e-168	Hem3
Mj-18900	PDGF/VEGF-related factor 1 [Penaeus vannamei]	1.66553e-164	2.32288	0.606	0.077	4.95994e-160	Hem3
Mj-19196	#N/A	1.3884e-155	2.24027	0.655	0.097	4.13465e-151	Hem3
Mj-18370	#N/A	1.4139e-144	1.91539	0.518	0.041	4.21059e-140	Hem3
Mj-4390	viral responsive protein [Penaeus japonicus]	1.29657e-124	2.2852	0.561	0.098	3.86117e-120	Hem3
Mj-11787	#N/A	2.54975e-117	1.99348	0.522	0.083	7.59317e-113	Hem3
Mj-23779	ALF-A1 [Penaeus japonicus]	8.07216e-117	2.3488	0.568	0.101	2.40389e-112	Hem3
Mj-3895	#N/A	7.64277e-114	1.8793	0.615	0.175	2.27602e-109	Hem3
Mj-2645	arginine kinase [Penaeus japonicus]	2.27049e-103	1.41646	0.887	0.5	6.76152e-99	Hem3
Mj-22189	arginine kinase [Penaeus japonicus]	8.29838e-88	1.3624	0.816	0.418	2.47126e-83	Hem3
Mj-21390	calponin/transgelin [Penaeus vannamei]	8.3177e-86	1.19283	0.886	0.567	2.47701e-81	Hem3
Mj-2940	calponin/transgelin [Penaeus vannamei]	1.56634e-70	1.11402	0.846	0.523	4.66457e-66	Hem3
Mj-19322	ALF-A1 [Penaeus japonicus]	9.75036e-57	1.13992	0.694	0.4	2.90366e-52	Hem3
Mj-1407	nucleolin-like [Penaeus vannamei]	8.0546e-48	1.84026	0.529	0.282	2.39866e-43	Hem3
Mj-7056	immediate early response gene 5 protein-like [Penaeus vannamei]	3.68791e-43	1.06947	0.552	0.261	1.09826e-38	Hem3
Mj-11947	transcription factor ATF-b [Penaeus vannamei]	2.66887e-34	1.0194	0.636	0.376	7.94789e-30	Hem3
Mj-18958	hypothetical protein [Penaeus japonicus]	1.45138275488453e-316	4.68041	0.839	0.168	4.32221784404612e-312	Hem3
Mj-20968	penaeidin-II [Penaeus japonicus]	4.14741e-232	1.51212	0.998	0.814	1.2351e-227	Hem4
Mj-1437	Tubulin beta-1 chain [Penaeus vannamei]	6.40247e-219	1.50803	0.998	0.756	1.90666e-214	Hem4
Mj-19281	penaeidin-II [Penaeus japonicus]	2.16526e-214	1.44875	0.989	0.762	6.44813e-210	Hem4
Mj-3213	glutathione peroxidase-like [Penaeus vannamei]	4.03697e-158	1.81009	0.947	0.556	1.20221e-153	Hem4
Mj-7049	anti-lipopolysaccharide factor like protein [Penaeus japonicus]	8.66605e-117	2.31488	0.767	0.316	2.58075e-112	Hem4
Mj-13898	hypothetical protein C7M84_015033 [Penaeus vannamei]	2.39397e-89	1.37268	0.861	0.421	7.12923e-85	Hem4
Mj-7220	#N/A	6.61786e-89	1.46578	0.709	0.248	1.9708e-84	Hem4
Mj-4478	#N/A	1.68982e-87	2.00639	0.741	0.314	5.03229e-83	Hem4
Mj-20087	cysteine-rich motor neuron 1 protein-like [Penaeus vannamei]	1.62186e-83	1.22545	0.868	0.455	4.8299e-79	Hem4
Mj-19599	uncharacterized protein LOC113827641 [Penaeus vannamei]	1.78201e-83	1.27498	0.902	0.528	5.30681e-79	Hem4
Mj-30781	cysteine-rich motor neuron 1 protein-like [Penaeus vannamei]	2.14926e-83	1.21686	0.876	0.492	6.4005e-79	Hem4
Mj-19602	LOW QUALITY PROTEIN: ovoinhibitor-like [Penaeus vannamei]	7.72301e-82	1.91566	0.688	0.255	2.29991e-77	Hem4
Mj-21267	LOW QUALITY PROTEIN: ovoinhibitor-like [Penaeus vannamei]	1.1273e-81	1.94251	0.699	0.271	3.35709e-77	Hem4
Mj-9552	hypothetical protein C7M84_011043 [Penaeus vannamei]	2.5078e-81	1.80635	0.517	0.121	7.46822e-77	Hem4
Mj-20967	#N/A	1.7144e-77	1.18287	0.788	0.319	5.10547e-73	Hem4
Mj-21270	LOW QUALITY PROTEIN: ovoinhibitor-like [Penaeus vannamei]	3.20626e-76	1.81153	0.684	0.255	9.54823e-72	Hem4
Mj-20057	LOW QUALITY PROTEIN: ovoinhibitor-like [Penaeus vannamei]	4.93144e-76	1.83788	0.618	0.222	1.46858e-71	Hem4
Mj-21278	LOW QUALITY PROTEIN: ovoinhibitor-like [Penaeus vannamei]	9.0605e-76	1.83302	0.654	0.241	2.69822e-71	Hem4
Mj-19212	cysteine-rich motor neuron 1 protein-like [Penaeus vannamei]	1.85162e-72	1.13793	0.859	0.472	5.51412e-68	Hem4
Mj-19279	uncharacterized protein LOC113827641 [Penaeus vannamei]	6.46495e-71	1.13395	0.9	0.611	1.92526e-66	Hem4
Mj-5103	uncharacterized protein LOC113827641 [Penaeus vannamei]	1.56613e-66	1.0517	0.891	0.572	4.66394e-62	Hem4
Mj-20100	cysteine-rich motor neuron 1 protein-like [Penaeus vannamei]	1.06774e-65	1.18884	0.718	0.307	3.17973e-61	Hem4
Mj-30785	cysteine-rich motor neuron 1 protein-like [Penaeus vannamei]	2.73208e-63	1.22215	0.705	0.316	8.13615e-59	Hem4
Mj-823	uncharacterized protein LOC113805459 [Penaeus vannamei]	1.34443e-61	1.21285	0.765	0.382	4.00371e-57	Hem4
Mj-8395	elongation factor 2-like isoform X2 [Penaeus vannamei]	3.11522e-60	1.02114	0.814	0.482	9.27713e-56	Hem4
Mj-17955	uncharacterized protein LOC113813800 [Penaeus vannamei]	1.11486e-59	1.19276	0.609	0.236	3.32006e-55	Hem4
Mj-20067	cysteine-rich motor neuron 1 protein-like [Penaeus vannamei]	4.22748e-57	1.17609	0.626	0.247	1.25894e-52	Hem4
Mj-3187	hypothetical protein C7M84_011043 [Penaeus vannamei]	2.41807e-53	1.28789	0.579	0.22	7.201e-49	Hem4
Mj-28225	triose-phosphate isomerase [Penaeus vannamei]	4.27821e-52	1.12149	0.65	0.283	1.27405e-47	Hem4
Mj-2645	arginine kinase [Penaeus japonicus]	4.4437e-52	1.00205	0.85	0.52	1.32333e-47	Hem4
Mj-10040	ML protein [Penaeus japonicus]	9.59134e-49	1.16186	0.598	0.243	2.8563e-44	Hem4
Mj-18199	uncharacterized protein LOC113808796 [Penaeus vannamei]	1.70655e-48	1.11845	0.673	0.315	5.08211e-44	Hem4
Mj-10863	uncharacterized protein LOC113820575 [Penaeus vannamei]	2.73279e-47	1.14891	0.538	0.209	8.13824e-43	Hem4
Mj-18245	penaeidin-II [Penaeus japonicus]	4.13459e-46	1.01073	0.613	0.258	1.23128e-41	Hem4
Mj-21466	crustacean hematopoietic factor-like protein [Penaeus vannamei]	5.24449e-46	1.08964	0.583	0.244	1.56181e-41	Hem4
Mj-21116	uncharacterized protein LOC113808796 [Penaeus vannamei]	5.84889e-41	1.07344	0.615	0.296	1.7418e-36	Hem4
Mj-18353	uncharacterized protein LOC113808796 [Penaeus vannamei]	5.81119e-36	1.02284	0.556	0.25	1.73057e-31	Hem4
Mj-25913	hypothetical protein C7M84_005490 [Penaeus vannamei]	3.77875e-89	2.89042	0.903	0.227	1.12531e-84	Hem5
Mj-25911	hypothetical protein C7M84_005490 [Penaeus vannamei]	5.73912e-82	2.82492	0.881	0.189	1.70911e-77	Hem5
Mj-1856	c-type lysozyme [Penaeus japonicus]	7.92694e-75	1.54868	0.993	0.79	2.36064e-70	Hem5
Mj-18296	#N/A	1.34877e-69	2.43171	0.769	0.125	4.01662e-65	Hem5
Mj-18305	hemocyte kazal-type proteinase inhibitor [Penaeus vannamei]	4.0997e-67	1.62567	0.993	0.539	1.22089e-62	Hem5
Mj-18360	LOW QUALITY PROTEIN: ovoinhibitor-like [Penaeus vannamei]	1.48217e-64	1.523	0.993	0.475	4.41391e-60	Hem5
Mj-17263	hemocyte kazal-type proteinase inhibitor [Penaeus vannamei]	2.01117e-63	1.59331	0.993	0.462	5.98927e-59	Hem5
Mj-18295	#N/A	1.56568e-60	2.34515	0.731	0.122	4.66259e-56	Hem5
Mj-18742	#N/A	3.48377e-57	1.40931	0.978	0.422	1.03747e-52	Hem5
Mj-18293	hypothetical protein C7M84_005490 [Penaeus vannamei]	1.45527e-56	1.94888	0.746	0.171	4.33379e-52	Hem5
Mj-28767	stylicin protein [Penaeus japonicus]	5.34978e-56	1.60439	0.963	0.482	1.59316e-51	Hem5
Mj-18294	#N/A	1.08581e-55	2.32347	0.679	0.109	3.23354e-51	Hem5
Mj-24303	hemocyte kazal-type proteinase inhibitor [Penaeus vannamei]	4.6604e-55	1.4374	0.985	0.438	1.38787e-50	Hem5
Mj-7095	alpha2-macroglobulin homolog [Penaeus japonicus]	1.27895e-49	1.57188	0.918	0.357	3.80871e-45	Hem5
Mj-3041	#N/A	2.01813e-49	1.49299	0.925	0.34	6.01e-45	Hem5
Mj-4542	#N/A	2.98822e-48	1.53196	0.948	0.544	8.89891e-44	Hem5
Mj-18731	#N/A	1.4391e-46	1.43707	0.933	0.366	4.28565e-42	Hem5
Mj-21032	alpha2-macroglobulin homolog [Penaeus japonicus]	1.41887e-45	1.56025	0.873	0.301	4.22538e-41	Hem5
Mj-17408	stylicin protein [Penaeus japonicus]	1.63473e-44	1.64191	0.843	0.311	4.86823e-40	Hem5
Mj-19371	#N/A	3.9984e-42	1.36088	0.91	0.322	1.19072e-37	Hem5
Mj-3141	hemocyte kazal-type proteinase inhibitor [Penaeus vannamei]	5.45215e-40	1.33334	0.821	0.259	1.62365e-35	Hem5
Mj-8087	#N/A	2.27328e-39	1.75232	0.724	0.243	6.76983e-35	Hem5
Mj-15960	transglutaminase, partial [Penaeus japonicus]	7.92858e-38	1.51778	0.761	0.241	2.36113e-33	Hem5
Mj-22477	#N/A	1.94834e-37	1.49423	0.769	0.216	5.80215e-33	Hem5
Mj-3245	#N/A	8.0896e-37	1.41645	0.843	0.289	2.40908e-32	Hem5
Mj-1653	hypothetical protein C7M84_003331 [Penaeus vannamei]	1.6542e-31	1.19025	0.978	0.678	4.92622e-27	Hem5
Mj-1973	late cornified envelope-like proline-rich protein 1 [Penaeus vannamei]	3.76671e-31	1.27441	0.799	0.303	1.12173e-26	Hem5
Mj-19309	superoxide dismutase [Cu-Zn]-like [Penaeus vannamei]	1.45695e-28	1.5681	0.664	0.226	4.33881e-24	Hem5
Mj-26396	hypothetical protein C7M84_016428 [Penaeus vannamei]	7.20084e-27	1.29838	0.754	0.297	2.14441e-22	Hem5
Mj-9527	superoxide dismutase [Cu-Zn]-like [Penaeus vannamei]	8.2078e-27	1.51555	0.649	0.217	2.44428e-22	Hem5
Mj-19726	#N/A	4.09606e-26	1.35667	0.716	0.266	1.21981e-21	Hem5
Mj-2121	c-type lysozyme [Penaeus japonicus]	2.05541e-25	1.32975	0.791	0.353	6.12102e-21	Hem5
Mj-21221	transglutaminase, partial [Penaeus japonicus]	2.85112e-25	1.2878	0.604	0.183	8.49064e-21	Hem5
Mj-15451	myosin heavy chain, non-muscle-like [Penaeus vannamei]	1.0107e-24	1.01184	0.918	0.621	3.00987e-20	Hem5
Mj-2328	prophenoloxidase activating factor [Penaeus vannamei]	1.12615e-21	1.40063	0.627	0.266	3.35367e-17	Hem5
Mj-30846	hypothetical protein C7M84_016241 [Penaeus vannamei]	6.53442e-21	1.62537	0.634	0.292	1.94595e-16	Hem5
Mj-16137	#N/A	5.0487e-19	1.0956	0.515	0.157	1.5035e-14	Hem5
Mj-21141	prophenoloxidase activating factor [Penaeus vannamei]	5.08924e-19	1.24427	0.597	0.226	1.51558e-14	Hem5
Mj-21138	LOW QUALITY PROTEIN: phenoloxidase-activating factor 2-like [Penaeus vannamei]	3.24102e-18	1.2423	0.612	0.282	9.65177e-14	Hem5
Mj-17639	prophenoloxidase activating factor [Penaeus vannamei]	9.43351e-18	1.21218	0.56	0.214	2.8093e-13	Hem5
Mj-1121	#N/A	5.36337e-17	1.05124	0.56	0.254	1.59721e-12	Hem5
Mj-10633	LOW QUALITY PROTEIN: protein phosphatase 1 regulatory subunit 37-like [Penaeus vannamei]	2.65077e-14	1.00182	0.522	0.215	7.894e-10	Hem5
Mj-17263	hemocyte kazal-type proteinase inhibitor [Penaeus vannamei]	0	3.08279	0.993	0.393	0	Hem6
Mj-18305	hemocyte kazal-type proteinase inhibitor [Penaeus vannamei]	0	3.14231	0.993	0.48	0	Hem6
Mj-18360	LOW QUALITY PROTEIN: ovoinhibitor-like [Penaeus vannamei]	0	3.09813	0.99	0.408	0	Hem6
Mj-19606	venom protein 302-like [Penaeus vannamei]	0	4.77863	0.944	0.312	0	Hem6
Mj-19618	venom protein 302-like [Penaeus vannamei]	0	4.71457	0.927	0.197	0	Hem6
Mj-21130	venom protein 302-like [Penaeus vannamei]	0	4.70572	0.925	0.188	0	Hem6
Mj-24303	hemocyte kazal-type proteinase inhibitor [Penaeus vannamei]	0	2.99481	0.983	0.368	0	Hem6
Mj-18742	#N/A	2.55577e-298	3.01863	0.985	0.349	7.61107e-294	Hem6
Mj-18731	#N/A	2.65304e-281	2.88877	0.976	0.285	7.90076e-277	Hem6
Mj-20968	penaeidin-II [Penaeus japonicus]	8.29426e-277	1.77956	0.995	0.819	2.47003e-272	Hem6
Mj-3041	#N/A	9.32843e-270	2.81901	0.978	0.255	2.77801e-265	Hem6
Mj-1437	Tubulin beta-1 chain [Penaeus vannamei]	4.67168e-268	1.77846	0.995	0.763	1.39123e-263	Hem6
Mj-24226	#N/A	7.18915e-267	3.56941	0.818	0.065	2.14093e-262	Hem6
Mj-1653	hypothetical protein C7M84_003331 [Penaeus vannamei]	1.1e-262	2.61252	0.993	0.637	3.27581e-258	Hem6
Mj-15987	prickle planar cell polarity protein 3-like [Penaeus vannamei]	6.25873e-262	3.36314	0.845	0.273	1.86385e-257	Hem6
Mj-7095	alpha2-macroglobulin homolog [Penaeus japonicus]	2.68464e-256	2.9089	0.971	0.275	7.99487e-252	Hem6
Mj-19371	#N/A	1.8008e-244	2.69607	0.954	0.237	5.36279e-240	Hem6
Mj-19281	penaeidin-II [Penaeus japonicus]	2.84688e-236	1.74929	0.998	0.766	8.47802e-232	Hem6
Mj-21032	alpha2-macroglobulin homolog [Penaeus japonicus]	5.99478e-232	2.79894	0.932	0.216	1.78524e-227	Hem6
Mj-1856	c-type lysozyme [Penaeus japonicus]	6.80666e-219	1.77808	0.995	0.763	2.02702e-214	Hem6
Mj-18414	regucalcin-like [Penaeus vannamei]	3.58551e-214	2.65521	0.801	0.094	1.06776e-209	Hem6
Mj-7203	crustin-like protein [Penaeus japonicus]	7.01195e-208	3.85253	0.717	0.071	2.08816e-203	Hem6
Mj-19757	crustin-like protein [Penaeus japonicus]	7.38964e-206	3.81334	0.719	0.073	2.20064e-201	Hem6
Mj-5658	single WAP domain-containing protein [Penaeus vannamei]	4.27533e-201	2.58086	0.949	0.385	1.27319e-196	Hem6
Mj-3245	#N/A	1.63376e-196	2.70744	0.903	0.205	4.86534e-192	Hem6
Mj-9167	uncharacterized protein CG1161-like [Penaeus vannamei]	1.43806e-190	3.37004	0.688	0.072	4.28254e-186	Hem6
Mj-20224	single WAP domain-containing protein [Penaeus vannamei]	3.38888e-190	1.76461	0.985	0.81	1.00921e-185	Hem6
Mj-22477	#N/A	2.91527e-187	2.35219	0.828	0.133	8.68169e-183	Hem6
Mj-3141	hemocyte kazal-type proteinase inhibitor [Penaeus vannamei]	2.33948e-185	2.84118	0.828	0.185	6.96698e-181	Hem6
Mj-21342	crustin-like protein [Penaeus japonicus]	1.10606e-177	3.27769	0.63	0.05	3.29385e-173	Hem6
Mj-511	dolichyl-diphosphooligosaccharide--protein glycosyltransferase subunit STT3B-like [Penaeus vannamei]	6.95686e-173	2.40384	0.7	0.101	2.07175e-168	Hem6
Mj-3787	double WAP domain-containing protein [Penaeus japonicus]	9.83042e-172	2.31078	0.889	0.238	2.9275e-167	Hem6
Mj-21138	LOW QUALITY PROTEIN: phenoloxidase-activating factor 2-like [Penaeus vannamei]	3.96334e-171	2.17235	0.857	0.192	1.18028e-166	Hem6
Mj-28767	stylicin protein [Penaeus japonicus]	1.03077e-168	1.82052	0.973	0.418	3.06964e-164	Hem6
Mj-19338	double WAP domain-containing protein [Penaeus japonicus]	1.79332e-163	2.22659	0.86	0.204	5.34052e-159	Hem6
Mj-18094	regucalcin-like [Penaeus vannamei]	1.22556e-162	3.03227	0.794	0.152	3.64973e-158	Hem6
Mj-19726	#N/A	8.94395e-161	2.99049	0.811	0.19	2.66351e-156	Hem6
Mj-18870	#N/A	9.14096e-160	2.18385	0.666	0.071	2.72218e-155	Hem6
Mj-18000	SAP30-binding protein-like [Penaeus vannamei]	1.62464e-157	3.14249	0.591	0.104	4.83819e-153	Hem6
Mj-18340	hemocyte kazal-type proteinase inhibitor [Penaeus vannamei]	1.00584e-153	2.05294	0.705	0.093	2.99538e-149	Hem6
Mj-5718	venom protein 302-like [Penaeus vannamei]	6.79627e-150	4.05527	0.586	0.068	2.02393e-145	Hem6
Mj-2328	prophenoloxidase activating factor [Penaeus vannamei]	1.39851e-149	2.0806	0.814	0.183	4.16475e-145	Hem6
Mj-26562	putative arginase-2, mitochondrial-like [Penaeus vannamei]	1.67429e-145	1.87815	0.729	0.115	4.98603e-141	Hem6
Mj-10499	vesicle-associated membrane protein 3-like isoform X1 [Penaeus vannamei]	4.1645e-145	1.99764	0.855	0.257	1.24019e-140	Hem6
Mj-8290	piggyBac transposable element-derived protein 4-like [Penaeus vannamei]	2.82034e-144	2.17371	0.835	0.229	8.39898e-140	Hem6
Mj-17279	regucalcin-like [Penaeus vannamei]	1.83854e-142	2.86404	0.741	0.165	5.47519e-138	Hem6
Mj-16137	#N/A	1.13644e-131	1.96904	0.637	0.088	3.3843e-127	Hem6
Mj-4542	#N/A	2.77215e-129	1.53659	0.944	0.492	8.25546e-125	Hem6
Mj-21141	prophenoloxidase activating factor [Penaeus vannamei]	3.26945e-128	1.93453	0.729	0.152	9.73643e-124	Hem6
Mj-24302	Kazal-type proteinase inhibitor [Penaeus vannamei]	1.14963e-126	1.73949	0.663	0.098	3.42361e-122	Hem6
Mj-17639	prophenoloxidase activating factor [Penaeus vannamei]	2.39912e-125	1.80194	0.714	0.139	7.14459e-121	Hem6
Mj-28125	double WAP domain-containing protein [Penaeus japonicus]	1.63492e-122	2.11668	0.743	0.19	4.86878e-118	Hem6
Mj-17408	stylicin protein [Penaeus japonicus]	1.00047e-121	1.65082	0.833	0.244	2.97941e-117	Hem6
Mj-21042	crustin-like peptide type 2 [Penaeus japonicus]	4.85555e-121	3.51926	0.504	0.065	1.44598e-116	Hem6
Mj-2121	c-type lysozyme [Penaeus japonicus]	4.30685e-120	1.53042	0.877	0.28	1.28258e-115	Hem6
Mj-18339	#N/A	3.52792e-113	1.71332	0.557	0.066	1.05062e-108	Hem6
Mj-4244	hypothetical protein C7M84_019554 [Penaeus vannamei]	6.46418e-113	1.85752	0.828	0.312	1.92503e-108	Hem6
Mj-20967	#N/A	1.04422e-112	1.52399	0.877	0.314	3.10969e-108	Hem6
Mj-21435	#N/A	6.90092e-112	1.6682	0.564	0.069	2.05509e-107	Hem6
Mj-19067	double WAP domain-containing protein [Penaeus japonicus]	8.05314e-105	1.78946	0.644	0.128	2.39822e-100	Hem6
Mj-19716	#N/A	2.1453e-102	1.70766	0.593	0.1	6.38871e-98	Hem6
Mj-21434	#N/A	5.55853e-102	1.59461	0.538	0.069	1.65533e-97	Hem6
Mj-30846	hypothetical protein C7M84_016241 [Penaeus vannamei]	9.73139e-102	2.4719	0.678	0.239	2.89801e-97	Hem6
Mj-1973	late cornified envelope-like proline-rich protein 1 [Penaeus vannamei]	2.8398e-99	1.48207	0.787	0.242	8.45694e-95	Hem6
Mj-4478	#N/A	1.88547e-97	1.31749	0.84	0.306	5.61493e-93	Hem6
Mj-3507	#N/A	8.70163e-97	1.53156	0.535	0.077	2.59135e-92	Hem6
Mj-19309	superoxide dismutase [Cu-Zn]-like [Penaeus vannamei]	2.43232e-95	1.45172	0.688	0.165	7.24345e-91	Hem6
Mj-9527	superoxide dismutase [Cu-Zn]-like [Penaeus vannamei]	9.76168e-95	1.49873	0.673	0.156	2.90703e-90	Hem6
Mj-21267	LOW QUALITY PROTEIN: ovoinhibitor-like [Penaeus vannamei]	3.20729e-94	1.30816	0.797	0.263	9.5513e-90	Hem6
Mj-2631	hypothetical protein C7M84_021013 [Penaeus vannamei]	3.13374e-91	1.27379	0.893	0.451	9.33227e-87	Hem6
Mj-3220	putative arginase-2, mitochondrial-like [Penaeus vannamei]	3.68789e-89	1.43314	0.695	0.203	1.09825e-84	Hem6
Mj-5103	uncharacterized protein LOC113827641 [Penaeus vannamei]	1.75221e-86	1.28616	0.952	0.569	5.21807e-82	Hem6
Mj-16308	prophenoloxidase [Penaeus japonicus]	2.69835e-86	1.57134	0.63	0.155	8.03569e-82	Hem6
Mj-16919	LOW QUALITY PROTEIN: phenoloxidase 3-like [Penaeus vannamei]	6.13634e-86	1.64639	0.712	0.237	1.8274e-81	Hem6
Mj-21096	regucalcin-like [Penaeus vannamei]	5.31625e-79	1.54429	0.76	0.612	1.58318e-74	Hem6
Mj-9304	#N/A	5.81652e-79	1.21871	0.84	0.403	1.73216e-74	Hem6
Mj-19602	LOW QUALITY PROTEIN: ovoinhibitor-like [Penaeus vannamei]	9.16621e-79	1.26479	0.748	0.254	2.7297e-74	Hem6
Mj-21270	LOW QUALITY PROTEIN: ovoinhibitor-like [Penaeus vannamei]	2.13555e-78	1.28063	0.748	0.254	6.35967e-74	Hem6
Mj-20057	LOW QUALITY PROTEIN: ovoinhibitor-like [Penaeus vannamei]	3.5794e-78	1.13145	0.697	0.216	1.06595e-73	Hem6
Mj-823	uncharacterized protein LOC113805459 [Penaeus vannamei]	6.19619e-77	1.29706	0.835	0.379	1.84523e-72	Hem6
Mj-26396	hypothetical protein C7M84_016428 [Penaeus vannamei]	1.4647e-76	1.37154	0.717	0.245	4.36189e-72	Hem6
Mj-28241	hypothetical protein C7M84_021013 [Penaeus vannamei]	2.36233e-76	1.1751	0.845	0.387	7.03502e-72	Hem6
Mj-21278	LOW QUALITY PROTEIN: ovoinhibitor-like [Penaeus vannamei]	4.72317e-73	1.20912	0.714	0.24	1.40656e-68	Hem6
Mj-15960	transglutaminase, partial [Penaeus japonicus]	6.07894e-71	1.27516	0.646	0.195	1.81031e-66	Hem6
Mj-8382	putative protein unc-45-like B [Penaeus vannamei]	1.18078e-70	1.79782	0.569	0.221	3.51636e-66	Hem6
Mj-18245	penaeidin-II [Penaeus japonicus]	1.48756e-70	1.22106	0.712	0.248	4.42995e-66	Hem6
Mj-21221	transglutaminase, partial [Penaeus japonicus]	1.52732e-67	1.16978	0.557	0.137	4.54835e-63	Hem6
Mj-16712	prophenoloxidase [Penaeus japonicus]	5.84758e-64	1.32821	0.559	0.163	1.74141e-59	Hem6
Mj-18199	uncharacterized protein LOC113808796 [Penaeus vannamei]	7.52995e-64	1.22797	0.751	0.309	2.24242e-59	Hem6
Mj-19599	uncharacterized protein LOC113827641 [Penaeus vannamei]	3.45103e-62	1.09195	0.906	0.537	1.02772e-57	Hem6
Mj-991	serine/threonine-protein kinase 26-like [Penaeus vannamei]	3.8378e-62	1.33033	0.538	0.15	1.1429e-57	Hem6
Mj-19279	uncharacterized protein LOC113827641 [Penaeus vannamei]	5.74327e-62	1.06246	0.93	0.613	1.71035e-57	Hem6
Mj-13898	hypothetical protein C7M84_015033 [Penaeus vannamei]	1.77108e-60	1.00176	0.857	0.433	5.27427e-56	Hem6
Mj-9528	#N/A	2.63476e-57	1.17954	0.547	0.158	7.84633e-53	Hem6
Mj-16869	LOW QUALITY PROTEIN: phenoloxidase 3-like [Penaeus vannamei]	1.05541e-55	1.34021	0.508	0.146	3.14301e-51	Hem6
Mj-10633	LOW QUALITY PROTEIN: protein phosphatase 1 regulatory subunit 37-like [Penaeus vannamei]	5.6885e-55	1.12333	0.554	0.169	1.69403e-50	Hem6
Mj-21116	uncharacterized protein LOC113808796 [Penaeus vannamei]	2.12081e-54	1.11224	0.692	0.29	6.31578e-50	Hem6
Mj-18353	uncharacterized protein LOC113808796 [Penaeus vannamei]	7.47587e-49	1.1963	0.62	0.245	2.22631e-44	Hem6
Mj-21115	uncharacterized protein LOC113808796 [Penaeus vannamei]	4.88172e-44	1.1746	0.576	0.223	1.45378e-39	Hem6
Mj-21110	uncharacterized protein LOC113808796 [Penaeus vannamei]	2.5989e-36	1.08777	0.586	0.269	7.73954e-32	Hem6
Mj-3187	hypothetical protein C7M84_011043 [Penaeus vannamei]	5.8901e-36	1.0014	0.559	0.233	1.75407e-31	Hem6
Mj-19617	venom protein 302-like [Penaeus vannamei]	2.05224493903891e-318	4.57065	0.908	0.172	6.11158542845788e-314	Hem6
