# Supplementary material for: Single-cell RNA-seq analysis reveals penaeid shrimp hemocyte subpopulations and cell differentiation process
Source: eLife. 2021 Jun 16;10:e66954. doi: 10.7554/eLife.66954 (PMC8266392; doi:10.7554/eLife.66954)
Supplement: Supplementary file 3. [file elife-66954-supp3.xlsx]

## Sheet: Supplementary file 3
Table representing Blastx researching of assembled genes against Drosophila cell cycle markers.
Single-cell RNA-seq analysis reveals penaeid shrimp hemocyte subpopulations and cell differentiation process
Keiichiro Koiwai a, b, *, Takashi Koyama c, d, Soichiro Tsuda e, Atsushi Toyoda f, Kiyoshi Kikuchi c, Hiroaki Suzuki g, Ryuji Kawano a
a Department of Biotechnology and Life Science, Tokyo University of Agriculture and Technology, Koganei, Tokyo 184-8588, Japan
b Laboratory of Genome Science, Tokyo University of Marine Science and Technology, Minato, Tokyo, 108-8477, Japan
c Fisheries Laboratory, Graduate School of Agricultural and Life Sciences, The University of Tokyo, Hamamatsu, Shizuoka 431-0214, Japan
d Graduate School of Fisheries and Environmental Sciences, Nagasaki University, Bunkyo-machi, Nagasaki, Nagasaki 852-8521, Japan
e bitBiome Inc., Waseda University Incubation Center, Nishiwaseda, Shinjuku, Tokyo 169-0051, Japan
f Advanced Genomics Center, National Institute of Genetics, Mishima, Shizuoka 411-8540, Japan
g Department of Precision Mechanics, Faculty of Science and Engineering, Chuo University, Bunkyo, Tokyo 112-8551, Japan
*To whom correspondence should be addressed. Email: koiwai@kaiyodai.ac.jp
Query	accession No.	Identity	e-value	Bit Score	celltype	Gene Symbol
Mj-1	FBpp0310031	52.38	3e-19	90.5	G2/M	pigs
Mj-97	FBpp0079641	28.12	6e-09	53.1	G2/M	Cdk1
Mj-294	FBpp0310031	53.17	8e-110	370	G2/M	pigs
Mj-370	FBpp0081957	28.01	6e-20	87.8	G2/M	aurA
Mj-842	FBpp0088320	65.91	7e-73	243	G2/M	Dsp1
Mj-991	FBpp0071094	29.18	6e-28	114	G2/M	Nek2
Mj-1020	FBpp0076588	24.12	4e-13	66.6	G2/M	CTCF
Mj-1218	FBpp0076588	34.52	9e-08	49.3	G2/M	CTCF
Mj-1951	FBpp0075690	25.29	3e-07	44.7	G2/M	vih
Mj-4364	FBpp0079252	45.28	6e-12	57	G2/M	Su(var)205
Mj-7069	FBpp0079641	33.56	1e-49	171	G2/M	Cdk1
Mj-7287	FBpp0086002	72.73	2e-61	207	G2/M	Mapmodulin
Mj-7569	FBpp0075690	35.86	6e-25	94.7	G2/M	vih
Mj-7584	FBpp0076487	25.24	2e-08	52.8	G2/M	pbl
Mj-7635	FBpp0079641	30.93	3e-38	142	G2/M	Cdk1
Mj-8173	FBpp0076489	28.46	1e-11	63.5	G2/M	pbl
Mj-8768	FBpp0081957	29.78	6e-29	113	G2/M	aurA
Mj-9001	FBpp0071094	31.27	8e-28	115	G2/M	Nek2
Mj-9922	FBpp0306890	37.97	2e-66	226	G2/M	stg
Mj-10514	FBpp0081957	30.17	5e-30	119	G2/M	aurA
Mj-10536	FBpp0079641	28.68	4e-21	91.3	G2/M	Cdk1
Mj-13127	FBpp0071094	27.56	1e-22	97.8	G2/M	Nek2
Mj-13141	FBpp0291019	56.49	2e-49	167	G2/M	HP1b
Mj-13381	FBpp0081957	32.7	6e-43	159	G2/M	aurA
Mj-13878	FBpp0076588	27.94	3e-32	128	G2/M	CTCF
Mj-14657	FBpp0071094	28.46	6e-28	114	G2/M	Nek2
Mj-14729	FBpp0075690	40	3e-24	95.5	G2/M	vih
Mj-14904	FBpp0076588	28.89	3e-27	108	G2/M	CTCF
Mj-15313	FBpp0071094	29.82	4e-31	126	G2/M	Nek2
Mj-15346	FBpp0076487	25.24	2e-08	52.8	G2/M	pbl
Mj-15369	FBpp0081957	30.8	2e-32	127	G2/M	aurA
Mj-15421	FBpp0081957	30.17	5e-30	119	G2/M	aurA
Mj-15431	FBpp0079641	69.79	2e-143	445	G2/M	Cdk1
Mj-15469	FBpp0081957	33.45	2e-40	152	G2/M	aurA
Mj-15526	FBpp0071094	29.13	6e-26	109	G2/M	Nek2
Mj-15554	FBpp0081957	32.7	5e-43	159	G2/M	aurA
Mj-15628	FBpp0081957	31.1	4e-31	122	G2/M	aurA
Mj-16160	FBpp0081957	30.71	8e-32	124	G2/M	aurA
Mj-16265	FBpp0071094	31.58	1e-32	129	G2/M	Nek2
Mj-16604	FBpp0071094	28.46	9e-28	114	G2/M	Nek2
Mj-16634	FBpp0306890	37.97	4e-66	226	G2/M	stg
Mj-16885	FBpp0076588	25.13	3e-24	102	G2/M	CTCF
Mj-20837	FBpp0088320	67.25	1e-72	242	G2/M	Dsp1
Mj-21604	FBpp0082911	26.23	4e-10	57	G2/M	Mps1
Mj-22380	FBpp0081957	30.63	1e-20	88.6	G2/M	aurA
Mj-22708	FBpp0082911	30.91	9e-12	62.8	G2/M	Mps1
Mj-22709	FBpp0082911	30.91	1e-11	62.8	G2/M	Mps1
Mj-23553	FBpp0071094	32.25	8e-29	115	G2/M	Nek2
Mj-23554	FBpp0071094	31.27	8e-28	115	G2/M	Nek2
Mj-25919	FBpp0082849	37.04	2e-11	57.8	G2/M	Det
Mj-26331	FBpp0076488	23	4e-09	54.3	G2/M	pbl
Mj-28111	FBpp0081957	29.73	1e-28	115	S	aurA
Mj-9611	FBpp0087402	24.54	8e-09	52	S	Caf1-105
Mj-10252	FBpp0081910	28.33	2e-09	54.7	S	Blm
Mj-13329	FBpp0087402	27.41	4e-09	52.8	S	Caf1-105
Mj-13362	FBpp0081910	22.97	5e-09	51.2	S	Blm
Mj-17013	FBpp0081910	32.79	7e-07	45.1	S	Blm
Mj-17931	FBpp0087402	29.9	2e-08	49.3	S	Caf1-105
Mj-21006	FBpp0081910	22.87	5e-14	67.8	S	Blm
Mj-25132	FBpp0081910	28.33	1e-09	54.7	S	Blm
Mj-28152	FBpp0081910	22.97	2e-08	50.4	S	Blm
