# Supplementary material for: Single-cell RNA-seq analysis reveals penaeid shrimp hemocyte subpopulations and cell differentiation process
Source: eLife. 2021 Jun 16;10:e66954. doi: 10.7554/eLife.66954 (PMC8266392; doi:10.7554/eLife.66954)
Supplement: Supplementary file 4. [file elife-66954-supp4.xlsx]

## Sheet: Supplementary file 4
Table representing Blastx researching of assembled genes against Drosophila cell type markers.
Single-cell RNA-seq analysis reveals penaeid shrimp hemocyte subpopulations and cell differentiation process
Keiichiro Koiwai a, b, *, Takashi Koyama c, d, Soichiro Tsuda e, Atsushi Toyoda f, Kiyoshi Kikuchi c, Hiroaki Suzuki g, Ryuji Kawano a
a Department of Biotechnology and Life Science, Tokyo University of Agriculture and Technology, Koganei, Tokyo 184-8588, Japan
b Laboratory of Genome Science, Tokyo University of Marine Science and Technology, Minato, Tokyo, 108-8477, Japan
c Fisheries Laboratory, Graduate School of Agricultural and Life Sciences, The University of Tokyo, Hamamatsu, Shizuoka 431-0214, Japan
d Graduate School of Fisheries and Environmental Sciences, Nagasaki University, Bunkyo-machi, Nagasaki, Nagasaki 852-8521, Japan
e bitBiome Inc., Waseda University Incubation Center, Nishiwaseda, Shinjuku, Tokyo 169-0051, Japan
f Advanced Genomics Center, National Institute of Genetics, Mishima, Shizuoka 411-8540, Japan
g Department of Precision Mechanics, Faculty of Science and Engineering, Chuo University, Bunkyo, Tokyo 112-8551, Japan
*To whom correspondence should be addressed. Email: koiwai@kaiyodai.ac.jp
Query	accession No.	Identity	e-value	Bit Score	celltype	Gene Symbol
Mj-7095	FBpp0303746	29.62	9e-75	266	Prohemocyte	Tep4
Mj-7615	FBpp0071475	24.43	1e-21	94.4	Prohemocyte	shg
Mj-1020	FBpp0077246	39.68	9e-10	53.1	Prohemocyte	odd
Mj-1218	FBpp0077246	41	1e-13	65.1	Prohemocyte	odd
Mj-13878	FBpp0077246	34.17	9e-20	84.7	Prohemocyte	odd
Mj-14904	FBpp0077246	30.56	5e-16	70.9	Prohemocyte	odd
Mj-15356	FBpp0074525	22	2e-26	110	Prohemocyte	dome
Mj-16885	FBpp0077246	48.28	6e-20	84.3	Prohemocyte	odd
Mj-21032	FBpp0303746	29.62	1e-74	266	Prohemocyte	Tep4
Mj-6	FBpp0305234	38.51	0	971	Plasmatocyte	Hml
Mj-248	FBpp0306700	36.11	2e-08	52.4	Plasmatocyte	bon
Mj-331	FBpp0089216	28.73	3e-54	202	Plasmatocyte	Pxn
Mj-442	FBpp0292320	60.34	1e-41	157	Plasmatocyte	ttk
Mj-1214	FBpp0077228	26.83	5e-10	54.7	Plasmatocyte	lectin-24A
Mj-7034	FBpp0088656	84.68	1e-60	216	Plasmatocyte	pnt
Mj-13402	FBpp0075495	31.72	2e-14	68.6	Plasmatocyte	Hml
Mj-14846	FBpp0292933	60.38	2e-16	77	Plasmatocyte	chinmo
Mj-15628	FBpp0089216	20.92	4e-14	70.9	Plasmatocyte	Pxn
Mj-15663	FBpp0292934	28.45	2e-11	61.2	Plasmatocyte	chinmo
Mj-15730	FBpp0088656	84.68	1e-60	216	Plasmatocyte	pnt
Mj-15894	FBpp0089216	28.73	2e-54	202	Plasmatocyte	Pxn
Mj-18851	FBpp0305234	31.72	2e-14	68.6	Plasmatocyte	Hml
Mj-23288	FBpp0306701	36.49	2e-08	51.6	Plasmatocyte	bon
Mj-23298	FBpp0306701	36	2e-08	51.6	Plasmatocyte	bon
Mj-26042	FBpp0292320	49.58	8e-35	134	Plasmatocyte	ttk
Mj-1	FBpp0308015	38.27	8e-33	135	Lamellocyte	cher
Mj-370	FBpp0072830	25.61	4e-13	67.8	Lamellocyte	msn
Mj-714	FBpp0088478	25.47	7e-07	47	Lamellocyte	cher
Mj-991	FBpp0305555	44.26	7e-65	233	Lamellocyte	msn
Mj-7034	FBpp0088656	84.68	2e-60	216	Lamellocyte	pnt
Mj-7069	FBpp0305555	29.81	9e-19	84.3	Lamellocyte	msn
Mj-7635	FBpp0072830	31.1	4e-18	84.3	Lamellocyte	msn
Mj-7880	FBpp0099539	88.11	3e-153	444	Lamellocyte	14-3-3zeta
Mj-7881	FBpp0089338	88.46	6e-27	105	Lamellocyte	14-3-3zeta
Mj-8768	FBpp0089312	25.08	3e-18	82.4	Lamellocyte	msn
Mj-9001	FBpp0305555	39.37	6e-60	220	Lamellocyte	msn
Mj-10514	FBpp0089312	38.25	1e-59	219	Lamellocyte	msn
Mj-10536	FBpp0072830	26.51	2e-13	69.7	Lamellocyte	msn
Mj-11119	FBpp0292427	61.46	0	2734	Lamellocyte	cher
Mj-11183	FBpp0089312	25	6e-08	50.4	Lamellocyte	msn
Mj-12440	FBpp0089344	40.45	2e-15	72.8	Lamellocyte	foxo
Mj-13127	FBpp0305554	31.65	6e-30	122	Lamellocyte	msn
Mj-13381	FBpp0305557	25.41	3e-17	81.6	Lamellocyte	msn
Mj-14653	FBpp0305557	23.98	3e-09	55.8	Lamellocyte	msn
Mj-14657	FBpp0072830	38.34	2e-46	174	Lamellocyte	msn
Mj-15313	FBpp0305554	45.7	1e-72	264	Lamellocyte	msn
Mj-15365	FBpp0088478	31.6	1e-27	116	Lamellocyte	cher
Mj-15369	FBpp0072830	31.48	3e-22	99	Lamellocyte	msn
Mj-15421	FBpp0089312	38.25	1e-59	219	Lamellocyte	msn
Mj-15431	FBpp0089312	28.44	8e-20	90.5	Lamellocyte	msn
Mj-15469	FBpp0089312	26.94	2e-15	76.3	Lamellocyte	msn
Mj-15526	FBpp0089312	76.02	0	691	Lamellocyte	msn
Mj-15554	FBpp0072830	26.07	6e-17	80.9	Lamellocyte	msn
Mj-15589	FBpp0086503	32.39	1e-41	160	Lamellocyte	ItgaPS4
Mj-15628	FBpp0072830	26.7	3e-14	72	Lamellocyte	msn
Mj-15663	FBpp0088656	38.46	1e-08	52.8	Lamellocyte	pnt
Mj-15730	FBpp0088656	84.68	2e-60	216	Lamellocyte	pnt
Mj-16160	FBpp0305554	26.37	3e-15	74.3	Lamellocyte	msn
Mj-16265	FBpp0305555	42.14	1e-70	251	Lamellocyte	msn
Mj-16604	FBpp0072830	38.34	3e-46	174	Lamellocyte	msn
Mj-17224	FBpp0089338	89.78	2e-78	251	Lamellocyte	14-3-3zeta
Mj-21312	FBpp0309123	40.66	0	592	Lamellocyte	mys
Mj-1020	FBpp0303113	25.36	2e-08	48.9	Crystalcell	klu
Mj-1218	FBpp0303113	43.42	3e-14	67.8	Crystalcell	klu
Mj-13878	FBpp0303113	24.38	1e-14	69.7	Crystalcell	klu
Mj-14904	FBpp0303113	25.27	8e-11	54.7	Crystalcell	klu
Mj-16308	FBpp0291497	39.92	2e-50	182	Crystalcell	PPO1
Mj-16712	FBpp0291497	37.95	2e-150	460	Crystalcell	PPO1
Mj-16869	FBpp0291497	37.94	9e-160	483	Crystalcell	PPO1
Mj-16885	FBpp0303113	35.8	3e-15	71.2	Crystalcell	klu
Mj-16919	FBpp0291497	38.88	3e-158	478	Crystalcell	PPO1
